# Supplementary material for: Enantioselective phosphonation of isoquinolines via chiral phosphoric acid-catalyzed dearomatization
Source: Royal Society of Chemistry journal article supplement (doi:10.1039/d2cc02811e), 2022-01-01
Supplement: d2cc02811e1.pdf [file d2cc02811e1.pdf]

# Enantioselective Phosphonation of Isoquinolines via Chiral Phosphoric Acid-Catalyzed Dearomatization

Zhenhua Gao; Yongbiao Guo\*

*State Key Laboratory of NBC Protection for Civilian, Beijing, P.R. China.*

\*Corresponding author (van87120@126.com)

## Supporting Information

### Table of Contents

|                                                                                                          |     |
|----------------------------------------------------------------------------------------------------------|-----|
| 1. Experimental Section and compound characterization .....                                              | 2   |
| 2. NMR spectrum of 1,2-dihydroisoquinoline-1-ylphosphonates 4 .....                                      | 22  |
| 3. NMR spectrum of 1,2-dihydroisoquinoline-1-ylphenylphosphine oxides 6 .....                            | 48  |
| 4. HPLC of 1,2-dihydroisoquinoline-1-ylphosphonates 4.....                                               | 69  |
| 5. HPLC of 1,2-dihydroisoquinoline-1-ylphenylphosphine oxides 6 .....                                    | 86  |
| 6. NMR spectrum and HPLC of diethyl ( <i>S</i> )-(1,2,3,4-tetrahydroisoquinolin-1-yl)phosphonate 8 ..... | 100 |
| 7. NMR spectrum of tert-butyl 1-(tert-butoxy)isoquinoline-2(1H)-carboxylate A. ....                      | 103 |

## 1. Experimental Section and compound characterization

**1.1 General information:** Reagents and solvents were purchased from common commercial suppliers and were used without further purification. Column chromatography was generally performed on silica gel (200-300 mesh). Melting points were determined with a Büchi B-545 melting-point apparatus. 600MHz <sup>1</sup>H NMR and 151MHz <sup>13</sup>C NMR spectra were recorded on Varian VMS-600 spectrometers, respectively. The chemical shifts are reported in ppm ( $\delta$  scale) relative to internal tetramethylsilane, and coupling constants are reported in hertz (Hz). High-resolution mass spectra (HRMS) were obtained on Agilent 6502 Q-TOF HPLC and mass spectrometry.

### 1.2 Reaction conditions optimization for the enantioselective dearomatization of 1,2-dihydroisoquinoline-1-ylphosphonates 4:

#### Further screening of aromatic and ether solvents<sup>a</sup>

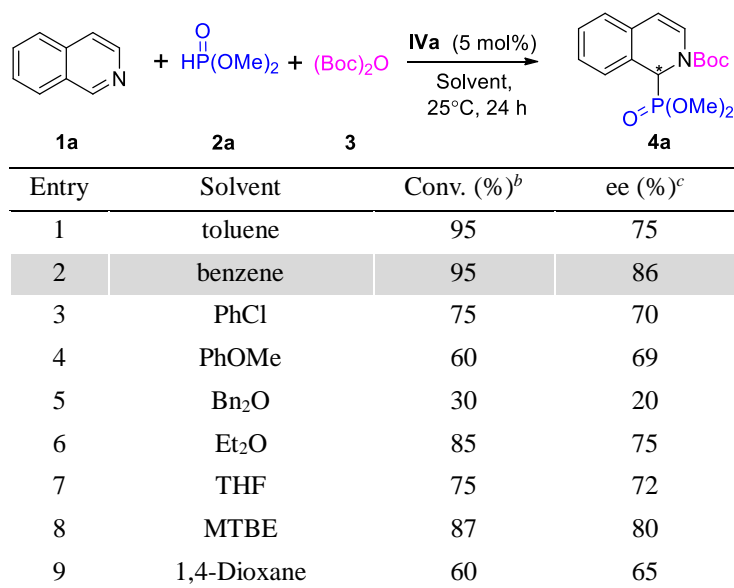

<sup>a</sup>Reaction conditions: **1a** (0.2 mmol), **2a** (0.4 mmol), **3** (0.4 mmol) and **IVa** (5 mol%) in solvent (4 mL). <sup>b</sup>Yield was determined by HPLC analysis. <sup>c</sup>Determined by HPLC (Chiralcel OD-RH).

#### Additional efforts at reaction optimization (temperature, additive, catalyst loading and concentration)<sup>a</sup>

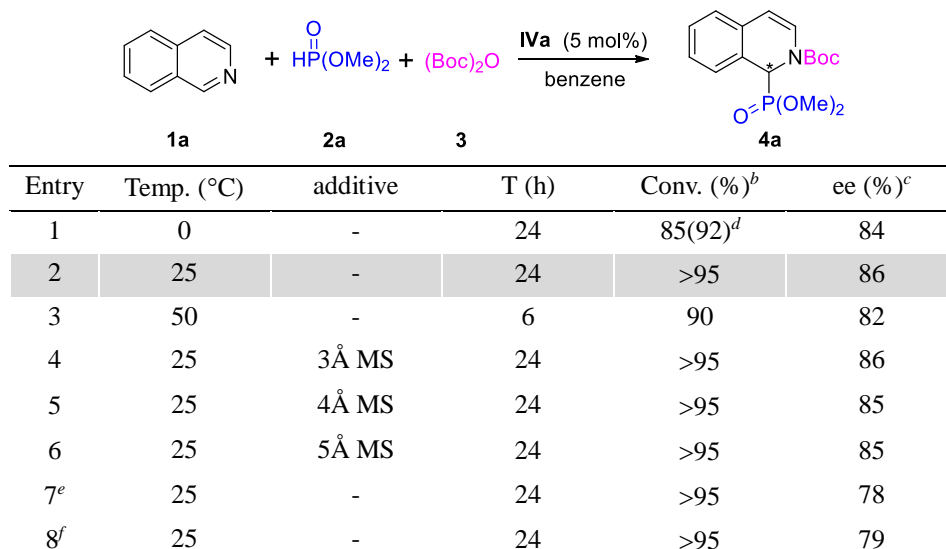

<sup>a</sup>Reaction conditions: **1a** (0.2 mmol), **2a** (0.4 mmol), **3** (0.4 mmol) and **IVa** (5 mol%) in benzene (4 mL). <sup>b</sup>Yield was determined by HPLC analysis. <sup>c</sup>Determined by HPLC (Chiralcel OD-RH). <sup>d</sup>48 h. <sup>e</sup> benzene (2 mL) was used. <sup>f</sup>**IVa** (2.5 mol%) was used. <sup>g</sup>**IVa** (10 mol%) was used.

**1.3 Procedure for the preparation of 1,2-dihydroisoquinoline-1-ylphosphonates 4.** A mixture of isoquinoline **1** (0.2 mmol), catalyst BINOL-CPAs **IVa** (5 mol%), (Boc)<sub>2</sub>O **3** (0.4mmol) and benzene (4 mL) was stirred at room temperature for 3~5 h. Then dimethyl phosphonate **2** (0.4mmol) was added and the reaction was stirred at room temperature for 20 h. The reaction mixture was concentrated under reduced pressure. The residue was purified by flash column chromatography with PE/EA (2/1) to obtain 1,2-dihydroisoquinoline-1-ylphosphonates **4** as a light yellow oil.

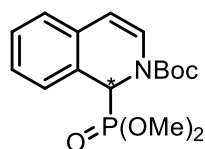

**4aa**

**Tert-butyl 1-(dimethoxyphosphoryl)isoquinoline-2(1H)-carboxylate (4aa).** Light yellow oil 64 mg, yield 95%; <sup>1</sup>H NMR(600 MHz, CDCl<sub>3</sub>): The compound exists as a 2:1 mixture of carbamate rotamers. Signals corresponding to the major rotamer:  $\delta$  7.26-7.22 (m, 2H), 7.20 (d,  $J = 7.1$  Hz, 1H), 7.04 (d,  $J = 6.9$  Hz, 1H), 6.83 (d,  $J = 7.7$  Hz, 1H), 5.90 (d,  $J = 8.1$  Hz, 1H), 5.81 (d,  $J = 7.8$  Hz, 1H), 3.68 (d,  $J = 10.6$  Hz, 3H), 3.55 (d,  $J = 10.5$  Hz, 3H), 1.53 (s, 9H); Signals corresponding to the minor rotamer:  $\delta$  7.24-7.20 (m, 2H), 7.19 (d,  $J = 7.4$  Hz, 1H), 7.06 (d,  $J = 7.1$  Hz, 1H), 7.01 (d,  $J = 7.9$  Hz, 1H), 5.91 (d,  $J = 7.8$  Hz, 1H), 5.72 (d,  $J = 15.6$  Hz, 1H), 3.67 (d,  $J = 10.6$  Hz, 3H), 3.46 (d,  $J = 10.4$  Hz, 3H), 1.55 (s, 9H); <sup>13</sup>C NMR (151 MHz, CDCl<sub>3</sub>) Signals corresponding to the major rotamer:  $\delta$  151.35, 131.34 (d,  $J = 3.8$  Hz), 128.59 (d,  $J = 3.4$  Hz), 127.61 (d,  $J = 5.5$  Hz), 127.25 (d,  $J = 2.8$  Hz), 125.65, 125.35, 124.74(d,  $J = 3.2$  Hz), 108.58, 82.23, 53.46 (d,  $J = 6.0$  Hz), 53.34 (d,  $J = 7.1$  Hz), 52.65 (d,  $J = 15.14$  Hz), 28.15; Signals corresponding to the minor rotamer:  $\delta$  151.56, 131.71 (d,  $J = 3.6$  Hz), 128.81 (d,  $J = 3.3$  Hz), 127.45 (d,  $J = 5.5$  Hz), 127.04 (d,  $J = 2.8$  Hz), 125.79, 125.15, 124.87 (d,  $J = 2.9$  Hz), 108.58, 82.36, 54.55 (d,  $J = 150.2$  Hz), 53.65 (d,  $J = 7.2$  Hz), 52.97 (d,  $J = 7.3$  Hz), 28.11; <sup>31</sup>P NMR (243 MHz, CDCl<sub>3</sub>):  $\delta$  22.32 (for major rotamer), 21.65 (for minor rotamer); HRMS (m/z) calcd for C<sub>16</sub>H<sub>22</sub>NO<sub>5</sub>PNa [M+Na]<sup>+</sup> 362.1128, found 362.1127; [ $\alpha$ ]<sub>D</sub><sup>25</sup> = +292.8 (c = 0.20, CHCl<sub>3</sub>); The *ee* was determined by HPLC analysis (Chiralpak OD-RH, CH<sub>3</sub>CN/H<sub>2</sub>O = 40/60, v/v, 1.0 mL/min, 305 nm,  $t_R$  (major) = 6.3 min,  $t_R$  (minor) = 7.1 min), 86% *ee*.

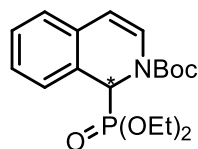

**4ab**

**Tert-butyl 1-(diethoxyphosphoryl)isoquinoline-2(1H)-carboxylate (4ab).** Light yellow oil 66 mg, yield 90%; <sup>1</sup>H NMR(600 MHz, CDCl<sub>3</sub>): The compound exists as a 1.8:1 mixture of carbamate rotamers. Signals corresponding to the major rotamer:  $\delta$  7.25-7.20 (m, 2H), 7.18 (d,  $J = 7.3$  Hz, 1H), 7.03 (d,  $J = 7.1$  Hz, 1H), 6.82 (d,  $J = 7.7$  Hz, 1H), 5.87 (d,  $J = 16.2$  Hz, 1H), 5.79 (d,  $J = 7.8$  Hz, 1H), 4.10-3.98 (m, 2H), 3.97-3.75 (m, 2H), 1.52 (s, 9H), 1.29-1.19 (m, 6H); Signals corresponding to the minor rotamer:  $\delta$

7.26-7.20 (m, 2H), 7.17 (d,  $J = 7.4$  Hz, 1H), 7.04 (d,  $J = 6.8$  Hz, 1H), 7.00 (d,  $J = 7.8$  Hz, 1H), 5.87 (d,  $J = 7.9$  Hz, 1H), 5.68 (d,  $J = 15.7$  Hz, 1H), 4.11-3.98 (m, 2H), 3.89-3.65 (m, 2H), 1.55 (s, 9H), 1.18-1.07 (m, 6H);  $^{13}\text{C}$  NMR (151 MHz,  $\text{CDCl}_3$ ) Signals corresponding to the major rotamer:  $\delta$  151.32, 131.46 (d,  $J = 3.8$  Hz), 128.45 (d,  $J = 3.4$  Hz), 127.67 (d,  $J = 5.4$  Hz), 127.12 (d,  $J = 2.8$  Hz), 125.75, 125.66, 124.63 (d,  $J = 3.0$  Hz), 108.78, 82.00, 62.84 (dd,  $J = 26.3, 6.8$  Hz), 52.92 (d,  $J = 151.6$  Hz), 28.18, 16.35 (t,  $J = 5.5$  Hz); Signals corresponding to the minor rotamer:  $\delta$  151.67, 131.79 (d,  $J = 3.9$  Hz), 128.64 (d,  $J = 3.3$  Hz), 127.44 (d,  $J = 5.4$  Hz), 126.91 (d,  $J = 2.7$  Hz), 125.88, 125.53, 124.77 (d,  $J = 2.9$  Hz), 108.91, 82.25, 62.80 (dd,  $J = 87.9, 7.3$  Hz), 54.84 (d,  $J = 150.4$  Hz), 28.14, 16.46 (dd,  $J = 10.0, 5.4$  Hz);  $^{31}\text{P}$  NMR (243 MHz,  $\text{CDCl}_3$ ):  $\delta$  19.60 (for major rotamer), 19.63 (for minor rotamer); HRMS (m/z) calcd for  $\text{C}_{18}\text{H}_{26}\text{NO}_5\text{PNa}$   $[\text{M}+\text{Na}]^+$  390.1441, found 390.1445;  $[\alpha]_{\text{D}}^{25} = +228.4$  ( $c = 0.20$ ,  $\text{CHCl}_3$ ); The *ee* was determined by HPLC analysis (Chiralpak OD-RH,  $\text{CH}_3\text{CN}/\text{H}_2\text{O} = 40/60$ , v/v, 1.0 mL/min, 305 nm,  $t_{\text{R}}$  (major) = 9.6 min,  $t_{\text{R}}$  (minor) = 11.3 min), 79% *ee*.

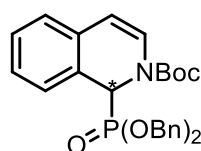

**4ac**

**Tert-butyl 1-(bis(benzyloxy)phosphoryl)isoquinoline-2(1H)-carboxylate 4ac.** Light yellow oil 86 mg, yield 88%;  $^1\text{H}$ -NMR (600 MHz,  $\text{CDCl}_3$ ): The compound exists as a 1.8:1 mixture of carbamate rotamers. Signals corresponding to the major rotamer:  $\delta$  7.31-7.14 (m, 13H), 7.04-6.99 (m, 1H), 6.80 (d,  $J = 7.8$  Hz, 1H), 6.02 (d,  $J = 16.1$  Hz, 1H), 5.76 (d,  $J = 7.8$  Hz, 1H), 4.99 (dd,  $J = 11.8, 6.8$  Hz, 1H), 4.94-4.85 (m, 2H), 4.72 (dd,  $J = 11.9, 8.3$  Hz, 1H), 1.45 (s, 9H); Signals corresponding to the minor rotamer:  $\delta$  7.31-7.14 (m, 13H), 7.04-6.99 (m, 2H), 5.85 (d,  $J = 7.8$  Hz, 1H), 5.79 (d,  $J = 15.5$  Hz, 1H), 4.94-4.85 (m, 2H), 4.79 (dd,  $J = 11.7, 7.2$  Hz, 1H), 4.54 (dd,  $J = 11.7, 8.3$  Hz, 1H), 1.42 (s, 9H);  $^{13}\text{C}$ -NMR (151 MHz,  $\text{CDCl}_3$ ): Signals corresponding to both rotamers:  $\delta$  151.53, 151.35, 136.39-136.26 (m), 136.13 (d,  $J = 5.9$  Hz), 136.04 (d,  $J = 6.0$  Hz), 131.86 (d,  $J = 3.7$  Hz), 131.51 (d,  $J = 3.8$  Hz), 128.78 (d,  $J = 3.4$  Hz), 128.58 (d,  $J = 3.4$  Hz), 128.41 (d,  $J = 2.7$  Hz), 128.31 (d,  $J = 2.9$  Hz), 128.12-128.01 (m), 127.93, 127.71 (d,  $J = 10.3$  Hz), 127.54 (d,  $J = 5.5$  Hz), 127.20 (d,  $J = 2.7$  Hz), 126.98 (d,  $J = 2.6$  Hz), 125.91, 125.77, 125.32 (d,  $J = 1.2$  Hz), 125.20 (d,  $J = 1.4$  Hz), 124.92 (d,  $J = 2.8$  Hz), 124.79 (d,  $J = 3.0$  Hz), 109.00, 108.82, 82.39, 82.15, 68.30 (d,  $J = 7.4$  Hz), 67.92 (d,  $J = 7.7$  Hz), 67.85, 67.78 (d,  $J = 7.4$  Hz), 55.01 (d,  $J = 149.6$  Hz), 53.19 (d,  $J = 151.1$  Hz), 28.12, 27.97;  $^{31}\text{P}$  NMR (243 MHz,  $\text{CDCl}_3$ ):  $\delta$  20.53 (for major rotamer), 20.39 (for minor rotamer); HRMS (m/z) calcd for  $\text{C}_{26}\text{H}_{26}\text{NO}_5\text{PNa}$   $[\text{M}+\text{Na}]^+$  486.1441, found 486.1444;  $[\alpha]_{\text{D}}^{25} = +206.8$  ( $c = 0.20$ ,  $\text{CHCl}_3$ ); The *ee* was determined by HPLC analysis (Chiralpak OD-RH,  $\text{CH}_3\text{CN}/\text{H}_2\text{O} = 60/40$ , v/v, 1.0 mL/min, 305 nm,  $t_{\text{R}}$  (major) = 8.7 min,  $t_{\text{R}}$  (minor) = 12.1 min), 80% *ee*.

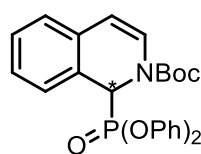

**4ad**

**Tert-butyl 1-(diphenoxyphosphoryl)isoquinoline-2(1H)-carboxylate (4ad).** Light yellow oil 83 mg, yield 90%;  $^1\text{H}$  NMR(600 MHz,  $\text{CDCl}_3$ ): The compound exists as a 1.3:1 mixture of carbamate rotamers.

Signals corresponding to the major rotamer:  $\delta$  7.33 (d,  $J = 7.5$  Hz, 1H), 7.27-7.18 (m, 4H), 7.16-7.08 (m, 3H), 7.07-6.99 (m, 4H), 6.93 (d,  $J = 8.5$  Hz, 1H), 6.88 (d,  $J = 7.8$  Hz, 1H), 6.71 (d,  $J = 8.5$  Hz, 1H), 6.33 (d,  $J = 16.0$  Hz, 1H), 5.84 (d,  $J = 7.8$  Hz, 1H), 1.50 (s, 9H); Signals corresponding to the minor rotamer:  $\delta$  7.34 (d,  $J = 7.6$  Hz, 1H), 7.28-7.18 (m, 4H), 7.16-7.08 (m, 3H), 7.08-6.99 (m, 5H), 6.93 (d,  $J = 8.5$  Hz, 1H), 6.71 (d,  $J = 8.5$  Hz, 1H), 6.11 (d,  $J = 14.2$  Hz, 1H), 5.89 (d,  $J = 7.9$  Hz, 1H), 1.51 (s, 9H);  $^{13}\text{C}$  NMR (151 MHz,  $\text{CDCl}_3$ ) Signals corresponding to the major rotamer:  $\delta$  151.47 (d,  $J = 29.7$  Hz), 150.37 (d,  $J = 10.5$  Hz), 131.73 (d,  $J = 4.0$  Hz), 129.61, 129.44, 128.94 (d,  $J = 3.7$  Hz), 127.88 (d,  $J = 5.7$  Hz), 127.35 (d,  $J = 2.8$  Hz), 125.70 (d,  $J = 3.3$  Hz), 125.01 (d,  $J = 3.2$  Hz), 124.88, 124.53, 120.45 (d,  $J = 4.4$  Hz), 120.09 (d,  $J = 4.5$  Hz), 109.28, 82.49, 53.87 (d,  $J = 154.5$  Hz), 28.16; Signals corresponding to the minor rotamer:  $\delta$  150.60 (d,  $J = 10.5$  Hz), 150.10 (d,  $J = 11.3$  Hz), 132.09 (d,  $J = 4.1$  Hz), 129.47, 129.12 (d,  $J = 3.7$  Hz), 127.77 (d,  $J = 5.6$  Hz), 127.13 (d,  $J = 2.9$  Hz), 125.16 (d,  $J = 3.3$  Hz), 125.11, 124.76, 124.30, 120.54 (d,  $J = 4.3$  Hz), 120.06 (d,  $J = 4.4$  Hz), 109.21, 82.81, 55.35 (d,  $J = 151.4$  Hz), 28.09;  $^{31}\text{P}$  NMR (243 MHz,  $\text{CDCl}_3$ ):  $\delta$  11.62 (for major rotamer), 11.50 (for minor rotamer); HRMS (m/z) calcd for  $\text{C}_{28}\text{H}_{30}\text{NO}_5\text{PNa}$   $[\text{M}+\text{Na}]^+$  514.1754, found 514.1751;  $[\alpha]_{\text{D}}^{25} = +233.5$  (c = 0.20,  $\text{CHCl}_3$ ); The *ee* was determined by HPLC analysis (Chiralpak OD-RH,  $\text{CH}_3\text{CN}/\text{H}_2\text{O} = 60/40$ , v/v, 1.0 mL/min, 305 nm,  $t_{\text{R}}$  (major) = 7.4 min,  $t_{\text{R}}$  (minor) = 8.8 min), 72% *ee*.

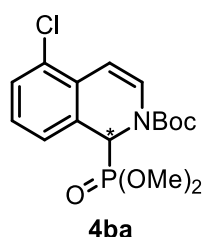

**Tert-butyl 5-chloro-1-(dimethoxyphosphoryl)isoquinoline-2(1H)-carboxylate (4ba).** Light yellow oil 62 mg, yield 84%;  $^1\text{H}$  NMR(600 MHz,  $\text{CDCl}_3$ ): The compound exists as a 2:1 mixture of carbamate rotamers. Signals corresponding to the major rotamer:  $\delta$  7.32-7.27 (m, 1H), 7.17-7.07 (m, 2H), 6.92 (d,  $J = 8.0$  Hz, 1H), 6.19 (d,  $J = 8.0$  Hz, 1H), 5.88 (d,  $J = 16.3$  Hz, 1H), 3.70 (d,  $J = 10.6$  Hz, 3H), 3.57 (d,  $J = 10.7$  Hz, 3H), 1.53 (s, 9H); Signals corresponding to the minor rotamer:  $\delta$  7.27-7.25 (m, 1H), 7.17-7.06 (m, 3H), 6.26 (d,  $J = 8.1$  Hz, 1H), 5.68 (d,  $J = 15.7$  Hz, 1H), 3.68 (d,  $J = 10.6$  Hz, 3H), 3.50 (d,  $J = 10.5$  Hz, 3H), 1.55 (s, 9H);  $^{13}\text{C}$  NMR (151 MHz,  $\text{CDCl}_3$ ) Signals corresponding to the major rotamer:  $\delta$  151.13, 129.96 (d,  $J = 3.6$  Hz), 129.57 (d,  $J = 3.3$  Hz), 129.37 (d,  $J = 3.3$  Hz), 127.74 (d,  $J = 2.9$  Hz), 127.37, 127.15, 126.15 (d,  $J = 5.5$  Hz), 104.74, 82.65, 53.54 (d,  $J = 6.1$  Hz), 53.34 (d,  $J = 7.1$  Hz), 52.66 (d,  $J = 151.5$  Hz), 28.12; Signals corresponding to the minor rotamer:  $\delta$  151.28, 130.07 (d,  $J = 3.6$  Hz), 129.72 (d,  $J = 3.5$  Hz), 129.34 (d,  $J = 3.0$  Hz), 127.51 (d,  $J = 3.0$  Hz), 127.37, 127.15, 125.97 (d,  $J = 5.6$  Hz), 104.75, 82.76, 54.58 (d,  $J = 150.6$  Hz), 53.68 (d,  $J = 7.3$  Hz), 53.08 (d,  $J = 7.3$  Hz), 28.07;  $^{31}\text{P}$  NMR (243 MHz,  $\text{CDCl}_3$ ):  $\delta$  21.75 (for major rotamer), 21.15 (for minor rotamer); HRMS (m/z) calcd for  $\text{C}_{16}\text{H}_{21}\text{ClNO}_5\text{PNa}$   $[\text{M}+\text{Na}]^+$  396.0738, found 396.0737;  $[\alpha]_{\text{D}}^{25} = +275.4$  (c = 0.20,  $\text{CHCl}_3$ ); The *ee* was determined by HPLC analysis (Chiralpak OD-RH,  $\text{CH}_3\text{CN}/\text{H}_2\text{O} = 50/50$ , v/v, 1.0 mL/min, 305 nm,  $t_{\text{R}}$  (major) = 11.6 min,  $t_{\text{R}}$  (minor) = 13.4 min), 81% *ee*.

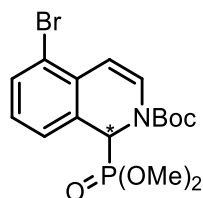

**4ca**

**Tert-butyl 5-bromo-1-(dimethoxyphosphoryl)isoquinoline-2(1H)-carboxylate (4ba).** Light yellow oil 75 mg, yield 90%;  $^1\text{H}$  NMR(600 MHz,  $\text{CDCl}_3$ ): The compound exists as a 2:1 mixture of carbamate rotamers. Signals corresponding to the major rotamer:  $\delta$  7.45 (d,  $J = 9.0$  Hz, 1H), 7.18 (d,  $J = 9.1$  Hz, 1H), 7.04 (d,  $J = 7.8$  Hz, 1H), 6.91 (d,  $J = 8.0$  Hz, 1H), 6.16 (d,  $J = 8.0$  Hz, 1H), 5.86 (d,  $J = 16.4$  Hz, 1H), 3.70 (d,  $J = 10.6$  Hz, 3H), 3.57 (d,  $J = 10.6$  Hz, 3H), 1.53 (s, 9H); Signals corresponding to the minor rotamer:  $\delta$  7.46 (d,  $J = 8.0$  Hz, 1H), 7.16 (d,  $J = 4.9$  Hz, 1H), 7.10 (d,  $J = 8.1$  Hz, 1H), 7.02 (d,  $J = 7.8$  Hz, 1H), 6.24 (d,  $J = 8.1$  Hz, 1H), 5.67 (d,  $J = 15.8$  Hz, 1H), 3.68 (d,  $J = 10.5$  Hz, 3H), 3.50 (d,  $J = 10.5$  Hz, 3H), 1.55 (s, 9H);  $^{13}\text{C}$  NMR (151 MHz,  $\text{CDCl}_3$ ) Signals corresponding to the major rotamer:  $\delta$  151.08, 132.66 (d,  $J = 3.6$  Hz), 130.98 (d,  $J = 3.7$  Hz), 128.04 (d,  $J = 2.7$  Hz), 127.44, 127.40, 126.86 (d,  $J = 5.5$  Hz), 120.31 (d,  $J = 3.4$  Hz), 107.27, 82.67, 53.54 (d,  $J = 6.1$  Hz), 53.35 (d,  $J = 7.1$  Hz), 52.79 (d,  $J = 15.1$  Hz), 28.11; Signals corresponding to the minor rotamer:  $\delta$  151.24, 132.87 (d,  $J = 3.5$  Hz), 131.36 (d,  $J = 3.5$  Hz), 127.81 (d,  $J = 2.8$  Hz), 127.63, 127.18, 126.67 (d,  $J = 5.7$  Hz), 120.41 (d,  $J = 3.5$  Hz), 107.27, 82.78, 54.71 (d,  $J = 15.5$  Hz), 53.69 (d,  $J = 7.1$  Hz), 53.08 (d,  $J = 7.2$  Hz), 28.07;  $^{31}\text{P}$  NMR (243 MHz,  $\text{CDCl}_3$ ):  $\delta$  21.77 (for major rotamer), 21.17 (for minor rotamer); HRMS (m/z) calcd for  $\text{C}_{16}\text{H}_{21}\text{BrNO}_5\text{PNa}$   $[\text{M}+\text{Na}]^+$  440.0233, found 440.0232;  $[\alpha]_{\text{D}}^{25} = +248.2$  (c = 0.20,  $\text{CHCl}_3$ ); The *ee* was determined by HPLC analysis (Chiralpak OD-RH,  $\text{CH}_3\text{CN}/\text{H}_2\text{O} = 50/50$ , v/v, 1.0 mL/min, 305 nm,  $t_{\text{R}}$  (major) = 13.6 min,  $t_{\text{R}}$  (minor) = 15.8 min), 82% *ee*.

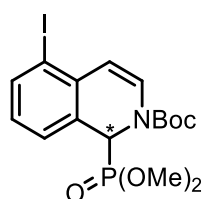

**4da**

**Tert-butyl 1-(dimethoxyphosphoryl)-5-iodoisoquinoline-2(1H)-carboxylate (4da).** Light yellow oil 88 mg, yield 95%;  $^1\text{H}$  NMR(600 MHz,  $\text{CDCl}_3$ ): The compound exists as a 2:1 mixture of carbamate rotamers. Signals corresponding to the major rotamer:  $\delta$  7.72 (d,  $J = 9.0$  Hz, 1H), 7.20 (d,  $J = 7.4$  Hz, 1H), 6.91-6.84 (m, 2H), 6.04 (d,  $J = 8.0$  Hz, 1H), 5.82 (d,  $J = 16.3$  Hz, 1H), 3.69 (d,  $J = 10.5$  Hz, 3H), 3.56 (d,  $J = 10.6$  Hz, 3H), 1.52 (s, 9H); Signals corresponding to the minor rotamer:  $\delta$  7.74 (d,  $J = 8.1$  Hz, 1H), 7.19 (d,  $J = 6.1$  Hz, 1H), 7.06 (d,  $J = 8.0$  Hz, 1H), 6.88 (d,  $J = 7.6$  Hz, 1H), 6.11 (d,  $J = 8.1$  Hz, 1H), 5.62 (d,  $J = 15.7$  Hz, 1H), 3.67 (d,  $J = 10.2$  Hz, 3H), 3.49 (d,  $J = 10.5$  Hz, 3H), 1.55 (s, 9H);  $^{13}\text{C}$  NMR (151 MHz,  $\text{CDCl}_3$ ) Signals corresponding to the major rotamer:  $\delta$  151.02, 139.32 (d,  $J = 3.5$  Hz), 134.07 (d,  $J = 3.7$  Hz), 128.38 (d,  $J = 2.8$  Hz), 127.85 (d,  $J = 5.5$  Hz), 127.72, 126.74, 112.14, 95.99 (d,  $J = 3.8$  Hz), 82.67, 53.53 (d,  $J = 6.1$  Hz), 53.37 (d,  $J = 7.0$  Hz), 53.01 (d,  $J = 15.1$  Hz), 28.11; Signals corresponding to the minor rotamer:  $\delta$  151.20, 139.53 (d,  $J = 3.5$  Hz), 134.46 (d,  $J = 3.8$  Hz), 128.14 (d,  $J = 3.0$  Hz), 127.97, 127.67 (d,  $J = 5.7$  Hz), 126.48, 112.17, 96.07 (d,  $J = 3.8$  Hz), 82.78, 54.93 (d,  $J = 15.4$  Hz), 53.71 (d,  $J = 7.1$  Hz), 53.06 (d,  $J = 7.2$  Hz), 28.07;  $^{31}\text{P}$  NMR (243 MHz,  $\text{CDCl}_3$ ):  $\delta$  21.79 (for major rotamer), 21.18 (for minor rotamer); HRMS (m/z) calcd for  $\text{C}_{16}\text{H}_{21}\text{INO}_5\text{PNa}$   $[\text{M}+\text{Na}]^+$  488.0094,

found 488.0090;  $[\alpha]_{\text{D}}^{25} = +235.1$  ( $c = 0.20$ ,  $\text{CHCl}_3$ ); The *ee* was determined by HPLC analysis (Chiralpak OD-RH,  $\text{CH}_3\text{CN}/\text{H}_2\text{O} = 50/50$ , v/v, 1.0 mL/min, 305 nm,  $t_{\text{R}}$  (major) = 17.2 min,  $t_{\text{R}}$  (minor) = 20.1 min), 78% *ee*.

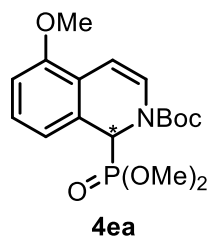

**Tert-butyl 1-(dimethoxyphosphoryl)-5-methoxyisoquinoline-2(1H)-carboxylate (4ea).** Light yellow oil 72 mg, yield 98%;  $^1\text{H}$  NMR(600 MHz,  $\text{CDCl}_3$ ): The compound exists as a 1.7:1 mixture of carbamate rotamers. Signals corresponding to the major rotamer:  $\delta$ 7.15 (d,  $J = 7.9$  Hz, 1H), 6.88-6.84 (m, 1H), 6.80 (d,  $J = 8.0$  Hz, 1H), 6.78 (d,  $J = 7.9$  Hz, 1H), 6.19 (d,  $J = 7.9$  Hz, 1H), 5.88 (d,  $J = 16.2$  Hz, 1H), 3.83 (s, 3H), 3.68 (d,  $J = 10.5$  Hz, 3H), 3.56 (d,  $J = 10.6$  Hz, 3H), 1.52 (s, 9H); Signals corresponding to the minor rotamer:  $\delta$ 7.16 (d,  $J = 8.0$  Hz, 1H), 6.98 (d,  $J = 8.0$  Hz, 1H), 6.90-6.83 (m, 1H), 6.80 (d,  $J = 8.0$  Hz, 1H), 6.26 (d,  $J = 8.0$  Hz, 1H), 5.69 (d,  $J = 15.6$  Hz, 1H), 3.83 (s, 3H), 3.67 (d,  $J = 10.2$  Hz, 3H), 3.49 (d,  $J = 10.4$  Hz, 3H), 1.55 (s, 9H);  $^{13}\text{C}$  NMR (151 MHz,  $\text{CDCl}_3$ ) Signals corresponding to the major rotamer:  $\delta$ 153.87 (d,  $J = 3.1$  Hz), 151.46, 127.96 (d,  $J = 2.6$  Hz), 126.73, 124.76, 120.53 (d,  $J = 4.1$  Hz), 119.95 (d,  $J = 5.1$  Hz), 110.38 (d,  $J = 3.0$  Hz), 103.29, 82.07, 55.52, 53.43 (d,  $J = 6.1$  Hz), 53.29 (d,  $J = 7.1$  Hz), 52.53 (d,  $J = 150.5$  Hz), 28.15; Signals corresponding to the minor rotamer:  $\delta$ 153.94 (d,  $J = 3.3$  Hz), 151.61, 127.75 (d,  $J = 2.7$  Hz), 126.47, 124.88, 120.91 (d,  $J = 4.1$  Hz), 119.74 (d,  $J = 5.1$  Hz), 110.58 (d,  $J = 3.2$  Hz), 103.33, 82.21, 55.56, 54.46 (d,  $J = 149.5$  Hz), 53.58 (d,  $J = 7.2$  Hz), 52.97 (d,  $J = 7.2$  Hz), 28.11;  $^{31}\text{P}$  NMR (243 MHz,  $\text{CDCl}_3$ ):  $\delta$ 22.43 (for major rotamer), 21.82 (for minor rotamer); HRMS (m/z) calcd for  $\text{C}_{17}\text{H}_{24}\text{NO}_6\text{PNa}$   $[\text{M}+\text{Na}]^+ 392.1233$ , found 392.1233;  $[\alpha]_{\text{D}}^{25} = +296.8$  ( $c = 0.20$ ,  $\text{CHCl}_3$ ); The *ee* was determined by HPLC analysis (Chiralpak OD-RH,  $\text{CH}_3\text{CN}/\text{H}_2\text{O} = 40/60$ , v/v, 1.0 mL/min, 305 nm,  $t_{\text{R}}$  (major) = 7.4 min,  $t_{\text{R}}$  (minor) = 8.4 min), 74% *ee*.

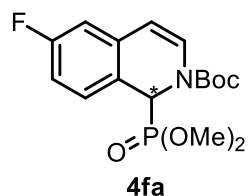

**Tert-butyl 1-(dimethoxyphosphoryl)-6-fluoroisoquinoline-2(1H)-carboxylate (4fa).** Light yellow oil 70 mg, yield 98%;  $^1\text{H}$  NMR(600 MHz,  $\text{CDCl}_3$ ): The compound exists as a 1.7:1 mixture of carbamate rotamers. Signals corresponding to the major rotamer:  $\delta$  7.24-7.16 (m, 1H), 6.91-6.83 (m, 2H), 6.75 (dd,  $J = 9.2, 2.6$  Hz, 1H), 5.88 (d,  $J = 15.5$  Hz, 1H), 5.75 (d,  $J = 7.9$  Hz, 1H), 3.69 (d,  $J = 10.5$  Hz, 3H), 3.57 (d,  $J = 10.6$  Hz, 3H), 1.53 (s, 9H); Signals corresponding to the minor rotamer:  $\delta$  7.22-7.17 (m, 1H), 7.07 (d,  $J = 7.8$  Hz, 1H), 6.92-6.88 (m, 1H), 6.79-6.76 (m, 1H), 5.84 (d,  $J = 7.9$  Hz, 1H), 5.69 (d,  $J = 15.0$  Hz, 1H), 3.68 (d,  $J = 10.4$  Hz, 3H), 3.50 (d,  $J = 10.5$  Hz, 3H), 1.55 (s, 9H);  $^{13}\text{C}$  NMR (151 MHz,  $\text{CDCl}_3$ ) Signals corresponding to the major rotamer:  $\delta$  162.89 (dd,  $J = 246.6, 3.5$  Hz), 151.21, 133.46 (dd,  $J = 8.7, 3.4$  Hz), 129.13 (dd,  $J = 8.7, 5.4$  Hz), 126.77, 120.97 (d,  $J = 2.1$  Hz), 113.79 (dd,  $J = 22.1, 2.6$  Hz), 111.46 (dd,  $J = 22.7, 3.1$  Hz), 107.68 (d,  $J = 2.3$  Hz), 82.57, 53.51 (d,  $J = 6.1$  Hz), 53.35 (d,  $J = 7.1$  Hz), 52.14 (d,  $J = 152.6$  Hz), 28.15; Signals corresponding to the minor rotamer:  $\delta$  163.00 (dd,  $J = 246.9, 3.7$

(Hz), 151.42, 133.90 (dd,  $J = 8.9, 3.2$  Hz), 128.97 (dd,  $J = 8.7, 5.4$  Hz), 126.98, 120.77, 113.57 (dd,  $J = 22.1, 2.4$  Hz), 111.57 (dd,  $J = 22.6, 2.9$  Hz), 107.79 (d,  $J = 2.0$  Hz), 82.68, 54.05 (d,  $J = 151.7$  Hz), 53.69 (d,  $J = 7.2$  Hz), 53.02 (d,  $J = 7.3$  Hz), 28.10;  $^{31}\text{P}$  NMR (243 MHz,  $\text{CDCl}_3$ ):  $\delta$  22.01(d,  $J = 5.9$  Hz) (for major rotamer), 21.39 (d,  $J = 6.3$  Hz)(for minor rotamer); HRMS (m/z) calcd for  $\text{C}_{16}\text{H}_{21}\text{FNO}_5\text{PNa}$   $[\text{M}+\text{Na}]^+$  380.1034, found 380.1038;  $[\alpha]_{\text{D}}^{25} = +275.4$  ( $c = 0.20$ ,  $\text{CHCl}_3$ ); The *ee* was determined by HPLC analysis (Chiralpak OD-RH,  $\text{CH}_3\text{CN}/\text{H}_2\text{O} = 40/60$ , v/v, 1.0 mL/min, 305 nm,  $t_{\text{R}}$  (major) = 7.3 min,  $t_{\text{R}}$  (minor) = 8.0 min), 83% *ee*.

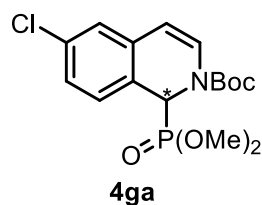

**Tert-butyl 6-chloro-1-(dimethoxyphosphoryl)isoquinoline-2(1H)-carboxylate (4ga).** Light yellow oil 72 mg, yield 96%;  $^1\text{H}$  NMR(600 MHz,  $\text{CDCl}_3$ ): The compound exists as a 1.7:1 mixture of carbamate rotamers. Signals corresponding to the major rotamer:  $\delta$  7.19-7.13 (m, 2H), 7.03 (d,  $J = 6.0$  Hz, 1H), 6.86 (d,  $J = 7.8$  Hz, 1H), 5.86 (d,  $J = 16.1$  Hz, 1H), 5.73 (d,  $J = 7.8$  Hz, 1H), 3.69 (d,  $J = 10.7$  Hz, 3H), 3.57 (d,  $J = 10.6$  Hz, 3H), 1.52 (s, 9H); Signals corresponding to the minor rotamer:  $\delta$  7.19-7.13 (m, 2H), 7.06 (d,  $J = 7.8$  Hz, 1H), 7.03 (d,  $J = 6.0$  Hz, 1H), 5.82 (d,  $J = 7.9$  Hz, 1H), 5.67 (d,  $J = 15.6$  Hz, 1H), 3.67 (d,  $J = 11.6$  Hz, 3H), 3.51 (d,  $J = 10.5$  Hz, 3H), 1.55 (s, 9H);  $^{13}\text{C}$  NMR (151 MHz,  $\text{CDCl}_3$ ) Signals corresponding to the major rotamer:  $\delta$  151.18, 134.38 (d,  $J = 4.2$  Hz), 133.05 (d,  $J = 3.5$  Hz), 128.78 (d,  $J = 5.4$  Hz), 126.98 (d,  $J = 2.7$  Hz), 126.84, 124.53 (d,  $J = 2.9$  Hz), 123.69, 107.36, 82.61, 53.44 (dd,  $J = 25.6, 6.6$  Hz), 52.21 (d,  $J = 152.0$  Hz), 28.12; Signals corresponding to the minor rotamer:  $\delta$  151.35, 134.60 (d,  $J = 4.3$  Hz), 133.44 (d,  $J = 3.4$  Hz), 128.60 (d,  $J = 5.5$  Hz), 127.07, 126.77 (d,  $J = 2.7$  Hz), 124.62 (d,  $J = 2.9$  Hz), 123.51, 107.48, 82.72, 54.12 (d,  $J = 151.2$  Hz), 53.37 (dd,  $J = 94.3, 7.3$  Hz), 28.07;  $^{31}\text{P}$  NMR (243 MHz,  $\text{CDCl}_3$ ):  $\delta$  21.78 (for major rotamer), 21.20(for minor rotamer); HRMS (m/z) calcd for  $\text{C}_{16}\text{H}_{21}\text{ClNO}_5\text{PNa}$   $[\text{M}+\text{Na}]^+$  396.0738, found 396.0737;  $[\alpha]_{\text{D}}^{25} = +241.1$  ( $c = 0.20$ ,  $\text{CHCl}_3$ ); The *ee* was determined by HPLC analysis (Chiralpak OD-RH,  $\text{CH}_3\text{CN}/\text{H}_2\text{O} = 50/50$ , v/v, 1.0 mL/min, 305 nm,  $t_{\text{R}}$  (major) = 11.3 min,  $t_{\text{R}}$  (minor) = 13.0 min), 82% *ee*.

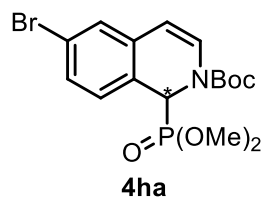

**Tert-butyl 6-bromo-1-(dimethoxyphosphoryl)isoquinoline-2(1H)-carboxylate (4ha).** Light yellow oil 79 mg, yield 95%;  $^1\text{H}$  NMR(600 MHz,  $\text{CDCl}_3$ ): The compound exists as a 1.8:1 mixture of carbamate rotamers. Signals corresponding to the major rotamer:  $\delta$  7.30 (dd,  $J = 8.1, 2.0$  Hz, 1H), 7.18 (dd,  $J = 6.4, 1.9$  Hz, 1H), 7.10 (dd,  $J = 8.0, 2.6$  Hz, 1H), 6.86 (d,  $J = 7.8$  Hz, 1H), 5.84 (d,  $J = 16.2$  Hz, 1H), 5.72 (d,  $J = 7.8$  Hz, 1H), 3.69 (d,  $J = 10.9$  Hz, 3H), 3.58 (d,  $J = 10.6$  Hz, 3H), 1.52 (s, 9H); Signals corresponding to the minor rotamer:  $\delta$  7.30 (dd,  $J = 8.1, 2.0$  Hz, 1H), 7.18 (dd,  $J = 6.4, 1.9$  Hz, 1H), 7.08 (d,  $J = 2.5$  Hz, 1H), 7.05 (d,  $J = 7.8$  Hz, 1H), 5.81 (d,  $J = 7.9$  Hz, 1H), 5.65 (d,  $J = 15.7$  Hz, 1H), 3.67 (d,  $J = 11.5$  Hz, 3H), 3.52 (d,  $J = 10.5$  Hz, 3H), 1.55 (s, 9H);  $^{13}\text{C}$  NMR (151 MHz,  $\text{CDCl}_3$ ) Signals corresponding to the major rotamer:  $\delta$  151.17, 133.36 (d,  $J = 3.3$  Hz), 129.91 (d,  $J = 2.8$  Hz), 129.05 (d,  $J = 5.4$  Hz), 127.42



(d,  $J = 3.0$  Hz), 126.87, 124.21, 122.49 (d,  $J = 4.3$  Hz), 107.22, 82.62, 53.54 (d,  $J = 6.1$  Hz), 53.36 (d,  $J = 7.2$  Hz), 52.27 (d,  $J = 152.1$  Hz), 28.12; Signals corresponding to the minor rotamer:  $\delta$  151.34, 133.74 (d,  $J = 3.7$  Hz), 129.70 (d,  $J = 2.8$  Hz), 128.86 (d,  $J = 5.5$  Hz), 127.51 (d,  $J = 3.0$  Hz), 127.09, 124.03, 122.71 (d,  $J = 4.5$  Hz), 107.35, 82.74, 54.18 (d,  $J = 152.5$  Hz), 53.69 (d,  $J = 6.8$  Hz), 53.08 (d,  $J = 7.3$  Hz), 28.07;  $^{31}\text{P}$  NMR (243 MHz,  $\text{CDCl}_3$ ):  $\delta$  21.62 (for major rotamer), 21.04 (for minor rotamer); HRMS (m/z) calcd for  $\text{C}_{16}\text{H}_{21}\text{BrNO}_5\text{PNa}$   $[\text{M}+\text{Na}]^+$  440.0233, found 440.0232;  $[\alpha]_{\text{D}}^{25} = +215.2$  ( $c = 0.20$ ,  $\text{CHCl}_3$ ); The *ee* was determined by HPLC analysis (Chiralpak OD-RH,  $\text{CH}_3\text{CN}/\text{H}_2\text{O} = 50/50$ , v/v, 1.0 mL/min, 305 nm,  $t_{\text{R}}$  (major) = 13.2 min,  $t_{\text{R}}$  (minor) = 15.4 min), 81% *ee*.

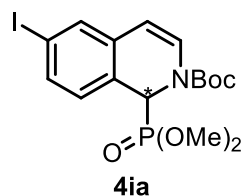

**Tert-butyl 1-(dimethoxyphosphoryl)-6-iodoisoquinoline-2(1H)-carboxylate (4ia).** Light yellow oil 91 mg, yield 98%;  $^1\text{H}$  NMR(600 MHz,  $\text{CDCl}_3$ ): The compound exists as a 2:1 mixture of carbamate rotamers. Signals corresponding to the major rotamer:  $\delta$  7.50 (d,  $J = 8.0$  Hz, 1H), 7.38 (d,  $J = 4.7$  Hz, 1H), 6.96 (dd,  $J = 8.0, 2.6$  Hz, 1H), 6.84 (d,  $J = 7.8$  Hz, 1H), 5.83 (d,  $J = 16.3$  Hz, 1H), 5.70 (d,  $J = 7.8$  Hz, 1H), 3.69 (d,  $J = 10.8$  Hz, 3H), 3.57 (d,  $J = 10.6$  Hz, 3H), 1.52 (s, 9H); Signals corresponding to the minor rotamer:  $\delta$  7.50 (d,  $J = 8.0$  Hz, 1H), 7.38 (d,  $J = 4.7$  Hz, 1H), 7.03 (d,  $J = 7.9$  Hz, 1H), 6.95 (dd,  $J = 8.0, 2.6$  Hz, 1H), 5.79 (d,  $J = 7.9$  Hz, 1H), 5.63 (d,  $J = 15.7$  Hz, 1H), 3.67 (d,  $J = 11.8$  Hz, 3H), 3.52 (d,  $J = 10.5$  Hz, 3H), 1.54 (s, 9H);  $^{13}\text{C}$  NMR (151 MHz,  $\text{CDCl}_3$ ) Signals corresponding to the major rotamer:  $\delta$  151.16, 135.90 (d,  $J = 2.8$  Hz), 133.47 (d,  $J = 3.5$  Hz), 133.30 (d,  $J = 2.9$  Hz), 129.17 (d,  $J = 5.5$  Hz), 126.74, 124.89, 107.04, 94.11 (d,  $J = 4.5$  Hz), 82.60, 53.53 (d,  $J = 6.0$  Hz), 53.36 (d,  $J = 7.1$  Hz), 52.32 (d,  $J = 151.8$  Hz), 28.11; Signals corresponding to the minor rotamer:  $\delta$  151.16, 135.90 (d,  $J = 2.8$  Hz), 133.47 (d,  $J = 3.5$  Hz), 133.30 (d,  $J = 2.9$  Hz), 129.17 (d,  $J = 5.5$  Hz), 126.74, 124.89, 107.04, 94.11 (d,  $J = 4.5$  Hz), 82.60, 53.53 (d,  $J = 6.0$  Hz), 53.36 (d,  $J = 7.1$  Hz), 52.32 (d,  $J = 151.8$  Hz), 28.11;  $^{31}\text{P}$  NMR (243 MHz,  $\text{CDCl}_3$ ):  $\delta$  21.62 (for major rotamer), 21.06 (for minor rotamer); HRMS (m/z) calcd for  $\text{C}_{16}\text{H}_{21}\text{INO}_5\text{PNa}$   $[\text{M}+\text{Na}]^+$  488.0094, found 488.0095;  $[\alpha]_{\text{D}}^{25} = +224.1$  ( $c = 0.20$ ,  $\text{CHCl}_3$ ); The *ee* was determined by HPLC analysis (Chiralpak OD-RH,  $\text{CH}_3\text{CN}/\text{H}_2\text{O} = 50/50$ , v/v, 1.0 mL/min, 305 nm,  $t_{\text{R}}$  (major) = 17.1 min,  $t_{\text{R}}$  (minor) = 20.5 min), 85% *ee*.

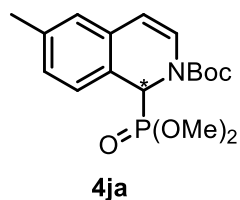

**Tert-butyl 1-(dimethoxyphosphoryl)-6-methylisoquinoline-2(1H)-carboxylate (4ja).** Light yellow oil 64 mg, yield 90%;  $^1\text{H}$  NMR(600 MHz,  $\text{CDCl}_3$ ): The compound exists as a 1.7:1 mixture of carbamate rotamers. Signals corresponding to the major rotamer:  $\delta$  7.12 (d,  $J = 7.8$  Hz, 1H), 7.00 (d,  $J = 7.3$  Hz, 1H), 6.86 (d,  $J = 6.1$  Hz, 1H), 6.81 (d,  $J = 7.7$  Hz, 1H), 5.86 (d,  $J = 15.6$  Hz, 1H), 5.76 (d,  $J = 7.8$  Hz, 1H), 3.68 (d,  $J = 10.6$  Hz, 3H), 3.55 (d,  $J = 10.5$  Hz, 3H), 2.30 (s, 3H), 1.52 (s, 9H); Signals corresponding to the minor rotamer:  $\delta$  7.13 (d,  $J = 7.8$  Hz, 1H), 7.01 (d,  $J = 7.3$  Hz, 1H), 6.99 (d,  $J = 7.3$  Hz, 1H), 6.86 (d,  $J = 5.8$  Hz, 2H), 5.85 (d,  $J = 7.7$  Hz, 2H), 5.68 (d,  $J = 15.1$  Hz, 1H), 3.66 (d,  $J = 8.8$  Hz, 3H), 3.47 (d,

$J = 10.4$  Hz, 3H), 2.30 (s, 3H), 1.54 (s, 9H);  $^{13}\text{C}$  NMR (151 MHz,  $\text{CDCl}_3$ ) Signals corresponding to the major rotamer:  $\delta$  151.38, 138.33 (d,  $J = 3.3$  Hz), 131.14 (d,  $J = 3.6$  Hz), 127.97 (d,  $J = 2.7$  Hz), 127.42 (d,  $J = 5.3$  Hz), 125.56, 125.48 (d,  $J = 3.0$  Hz), 122.38, 108.66, 82.13, 53.41 (d,  $J = 6.1$  Hz), 53.32 (d,  $J = 7.0$  Hz), 52.91, 51.90, 28.15, 21.16; Signals corresponding to the minor rotamer:  $\delta$  151.61, 138.57 (d,  $J = 3.5$  Hz), 127.75 (d,  $J = 2.7$  Hz), 127.25 (d,  $J = 5.2$  Hz), 125.69, 125.60 (d,  $J = 3.0$  Hz), 122.20, 108.80, 82.25, 54.80, 53.80, 53.62 (d,  $J = 7.2$  Hz), 52.93 (d,  $J = 8.8$  Hz), 28.11, 21.16;  $^{31}\text{P}$  NMR (243 MHz,  $\text{CDCl}_3$ ):  $\delta$  22.53 (for major rotamer), 21.89 (for minor rotamer); HRMS (m/z) calcd for  $\text{C}_{17}\text{H}_{24}\text{NO}_5\text{PNa}$   $[\text{M}+\text{Na}]^+$  376.1284, found 376.1285;  $[\alpha]_{\text{D}}^{25} = +210.8$  (c = 0.20,  $\text{CHCl}_3$ ); The *ee* was determined by HPLC analysis (Chiralpak OD-RH,  $\text{CH}_3\text{CN}/\text{H}_2\text{O} = 40/60$ , v/v, 1.0 mL/min, 305 nm,  $t_{\text{R}}$  (major) = 8.4 min,  $t_{\text{R}}$  (minor) = 9.7 min), 84% *ee*.

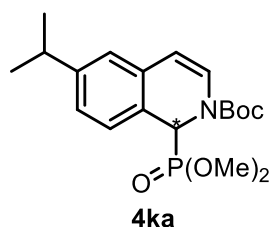

**Tert-butyl 1-(dimethoxyphosphoryl)-6-isopropylisoquinoline-2(1H)-carboxylate (4ka).** Light yellow oil 72 mg, yield 95%;  $^1\text{H}$  NMR(600 MHz,  $\text{CDCl}_3$ ): The compound exists as a 1.7:1 mixture of carbamate rotamers. Signals corresponding to the major rotamer:  $\delta$  7.16 (d,  $J = 7.8$  Hz, 1H), 7.06 (d,  $J = 7.8$  Hz, 1H), 6.91 (d,  $J = 4.6$  Hz, 1H), 6.81 (d,  $J = 7.8$  Hz, 1H), 5.87 (d,  $J = 11.7$  Hz, 1H), 5.80 (d,  $J = 7.8$  Hz, 1H), 3.68 (d,  $J = 10.6$  Hz, 3H), 3.55 (d,  $J = 10.5$  Hz, 3H), 2.89-2.82 (m, 1H), 1.51 (s, 9H), 1.22 (d,  $J = 6.9$  Hz, 6H); Signals corresponding to the minor rotamer:  $\delta$  7.16 (d,  $J = 7.8$  Hz, 1H), 7.06 (d,  $J = 7.8$  Hz, 1H), 6.99 (d,  $J = 7.8$  Hz, 1H), 6.91 (d,  $J = 4.6$  Hz, 1H), 5.89 (d,  $J = 3.8$  Hz, 1H), 5.69 (d,  $J = 15.2$  Hz, 1H), 3.66 (d,  $J = 10.6$  Hz, 3H), 3.46 (d,  $J = 10.4$  Hz, 3H), 2.91-2.79 (m, 1H), 1.54 (s, 9H), 1.22 (d,  $J = 6.9$  Hz, 6H);  $^{13}\text{C}$  NMR (151 MHz,  $\text{CDCl}_3$ ) Signals corresponding to the major rotamer:  $\delta$  151.37, 149.38 (d,  $J = 3.9$  Hz), 131.15 (d,  $J = 3.8$  Hz), 127.51 (d,  $J = 5.3$  Hz), 125.47, 122.91 (d,  $J = 3.1$  Hz), 122.71, 108.93, 82.08, 53.41 (d,  $J = 6.0$  Hz), 53.31 (d,  $J = 6.9$  Hz), 52.35 (d,  $J = 151.5$  Hz), 33.84, 28.15, 23.84; Signals corresponding to the minor rotamer:  $\delta$  151.59, 149.68 (d,  $J = 3.7$  Hz), 131.53 (d,  $J = 3.8$  Hz), 127.36 (d,  $J = 5.4$  Hz), 125.60, 125.22 (d,  $J = 2.8$  Hz), 123.05 (d,  $J = 3.2$  Hz), 122.51 (d,  $J = 1.9$  Hz), 109.06, 82.21, 54.28 (d,  $J = 150.7$  Hz), 53.63 (d,  $J = 7.2$  Hz), 52.92 (d,  $J = 7.5$  Hz), 33.84, 28.12, 23.84;  $^{31}\text{P}$  NMR (243 MHz,  $\text{CDCl}_3$ ):  $\delta$  22.47 (for major rotamer), 21.79 (for minor rotamer); HRMS (m/z) calcd for  $\text{C}_{19}\text{H}_{28}\text{NO}_5\text{PNa}$   $[\text{M}+\text{Na}]^+$  404.1597, found 404.1601;  $[\alpha]_{\text{D}}^{25} = +204.2$  (c = 0.20,  $\text{CHCl}_3$ ); The *ee* was determined by HPLC analysis (Chiralpak OD-RH,  $\text{CH}_3\text{CN}/\text{H}_2\text{O} = 50/50$ , v/v, 1.0 mL/min, 305 nm,  $t_{\text{R}}$  (major) = 15.0 min,  $t_{\text{R}}$  (minor) = 17.1 min), 80% *ee*.

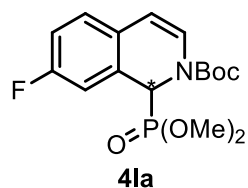

**Tert-butyl 1-(dimethoxyphosphoryl)-7-fluoroisoquinoline-2(1H)-carboxylate (4la).** Light yellow oil 40 mg, yield 56%;  $^1\text{H}$  NMR(600 MHz,  $\text{CDCl}_3$ ): The compound exists as a 1.8:1 mixture of carbamate rotamers. Signals corresponding to the major rotamer:  $\delta$  7.05-6.95 (m, 2H), 6.95-6.90 (m, 1H), 6.79 (d,  $J = 7.7$  Hz, 1H), 5.86 (d,  $J = 17.3$  Hz, 1H), 5.78 (d,  $J = 7.8$  Hz, 1H), 3.70 (d,  $J = 10.8$  Hz, 3H), 3.59 (d,  $J$

= 10.6 Hz, 3H), 1.52 (s, 9H); Signals corresponding to the minor rotamer:  $\delta$  7.05-6.95 (m, 3H), 6.95-6.90 (m, 1H), 5.86 (d,  $J$  = 10.2 Hz, 1H), 5.66 (d,  $J$  = 16.2 Hz, 1H), 3.68 (d,  $J$  = 11.3 Hz, 3H), 3.54 (d,  $J$  = 10.5 Hz, 3H), 1.55 (s, 9H);  $^{13}\text{C}$  NMR (151 MHz,  $\text{CDCl}_3$ ) Signals corresponding to the major rotamer:  $\delta$  161.70 (dd,  $J$  = 247.3, 3.1 Hz), 151.34, 127.63 (t,  $J$  = 3.6 Hz), 127.52 (dd,  $J$  = 7.5, 1.5 Hz), 126.14 (dd,  $J$  = 8.3, 3.2 Hz), 124.99 (d,  $J$  = 2.5 Hz), 115.42 (dd,  $J$  = 21.6, 3.3 Hz), 114.91 (dd,  $J$  = 23.4, 5.2 Hz), 107.79, 82.42, 53.51 (d,  $J$  = 6.1 Hz), 53.37 (d,  $J$  = 7.2 Hz), 52.51 (dd,  $J$  = 151.8, 2.2 Hz), 28.13; Signals corresponding to the minor rotamer:  $\delta$  161.57 (dd,  $J$  = 247.6, 3.0 Hz), 151.45, 127.97 (t,  $J$  = 3.4 Hz), 127.30 (dd,  $J$  = 7.7, 1.5 Hz), 126.22 (dd,  $J$  = 9.0, 3.0 Hz), 125.18 (d,  $J$  = 2.1 Hz), 115.57 (dd,  $J$  = 24.0, 3.4 Hz), 114.78 (dd,  $J$  = 23.5, 5.1 Hz), 107.95, 82.56, 54.40 (dd,  $J$  = 150.8, 1.7 Hz), 53.63 (d,  $J$  = 7.2 Hz), 53.09 (d,  $J$  = 7.2 Hz), 28.09;  $^{31}\text{P}$  NMR (243 MHz,  $\text{CDCl}_3$ ):  $\delta$  21.70 (for major rotamer), 21.20 (for minor rotamer); HRMS ( $m/z$ ) calcd for  $\text{C}_{16}\text{H}_{21}\text{FNO}_5\text{PNa}$   $[\text{M}+\text{Na}]^+$  380.1034, found 380.1033;  $[\alpha]_{\text{D}}^{25} = +342.4$  ( $c$  = 0.20,  $\text{CHCl}_3$ ); The  $ee$  was determined by HPLC analysis (Chiralpak OD-3R,  $\text{CH}_3\text{CN}/\text{H}_2\text{O}$  = 40/60, v/v, 0.6 mL/min, 305 nm,  $t_{\text{R}}$  (major) = 11.4 min,  $t_{\text{R}}$  (minor) = 12.3 min), 80%  $ee$ .

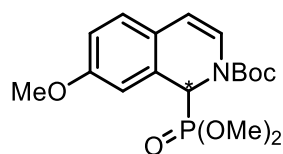

**4ma**

**Tert-butyl 1-(dimethoxyphosphoryl)-7-methoxyisoquinoline-2(1H)-carboxylate (4ma).** Light yellow oil 35 mg, yield 48%;  $^1\text{H}$  NMR(600 MHz,  $\text{CDCl}_3$ ): The compound exists as a 1.9:1 mixture of carbamate rotamers. Signals corresponding to the major rotamer:  $\delta$  6.98 (d,  $J$  = 8.0 Hz, 1H), 6.83-6.79 (m, 1H), 6.79-6.76 (m, 1H), 6.72 (d,  $J$  = 7.7 Hz, 1H), 5.86 (d,  $J$  = 16.5 Hz, 1H), 5.78 (d,  $J$  = 7.8 Hz, 1H), 3.80 (s, 3H), 3.69 (d,  $J$  = 10.6 Hz, 3H), 3.55 (d,  $J$  = 10.6 Hz, 3H), 1.52 (s, 9H); Signals corresponding to the minor rotamer:  $\delta$  6.99 (d,  $J$  = 7.7 Hz, 1H), 6.90 (d,  $J$  = 7.8 Hz, 1H), 6.83-6.79 (m, 1H), 6.79-6.76 (m, 1H), 5.87 (d,  $J$  = 7.9 Hz, 1H), 5.67 (d,  $J$  = 15.9 Hz, 1H), 3.81 (s, 3H), 3.67 (d,  $J$  = 10.5 Hz, 3H), 3.48 (d,  $J$  = 10.5 Hz, 3H), 1.55 (s, 9H);  $^{13}\text{C}$  NMR (151 MHz,  $\text{CDCl}_3$ ) Signals corresponding to the major rotamer:  $\delta$  158.91 (d,  $J$  = 2.8 Hz), 151.53, 126.94, 125.94 (d,  $J$  = 3.2 Hz), 124.31 (d,  $J$  = 4.1 Hz), 123.46, 114.22 (d,  $J$  = 4.0 Hz), 113.22 (d,  $J$  = 5.1 Hz), 108.46, 82.06, 55.44, 53.45 (d,  $J$  = 6.0 Hz), 53.37 (d,  $J$  = 7.1 Hz), 52.79 (d,  $J$  = 150.4 Hz), 28.17; Signals corresponding to the minor rotamer:  $\delta$  158.78 (d,  $J$  = 2.8 Hz), 151.64, 126.71, 126.05 (d,  $J$  = 3.2 Hz), 124.63 (d,  $J$  = 4.0 Hz), 123.59, 114.25 (d,  $J$  = 4.8 Hz), 113.22 (d,  $J$  = 5.1 Hz), 108.61, 82.21, 55.44, 54.70 (d,  $J$  = 149.3 Hz), 53.69 (d,  $J$  = 7.2 Hz), 52.96 (d,  $J$  = 7.2 Hz), 28.14;  $^{31}\text{P}$  NMR (243 MHz,  $\text{CDCl}_3$ ):  $\delta$  22.36 (for major rotamer), 21.72 (for minor rotamer); HRMS ( $m/z$ ) calcd for  $\text{C}_{17}\text{H}_{24}\text{NO}_6\text{PNa}$   $[\text{M}+\text{Na}]^+$  392.1233, found 392.1231;  $[\alpha]_{\text{D}}^{25} = +226.2$  ( $c$  = 0.20,  $\text{CHCl}_3$ ); The  $ee$  was determined by HPLC analysis (Chiralpak OD-3R,  $\text{CH}_3\text{CN}/\text{H}_2\text{O}$  = 40/60, v/v, 0.6 mL/min, 305 nm,  $t_{\text{R}}$  (major) = 10.4 min,  $t_{\text{R}}$  (minor) = 11.2 min), 84%  $ee$ .

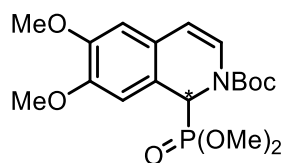

**4na**

**Tert-butyl 1-(dimethoxyphosphoryl)-6,7-dimethoxyisoquinoline-2(1H)-carboxylate (4na).** Light yellow oil 24 mg, yield 30%;  $^1\text{H}$  NMR(600 MHz,  $\text{CDCl}_3$ ): The compound exists as a 1.7:1 mixture of

carbamate rotamers. Signals corresponding to the major rotamer:  $\delta$  6.79 (s, 1H), 6.74 (d,  $J = 7.7$  Hz, 1H), 6.59 (d,  $J = 5.8$  Hz, 1H), 5.83 (d,  $J = 15.3$  Hz, 1H), 5.74 (d,  $J = 7.7$  Hz, 1H), 3.88 (s, 3H), 3.86 (s, 3H), 3.70 (d,  $J = 9.8$  Hz, 3H), 3.54 (d,  $J = 10.5$  Hz, 3H), 1.52 (s, 9H); Signals corresponding to the minor rotamer:  $\delta$  6.92 (d,  $J = 7.8$  Hz, 1H), 6.79 (s, 1H), 6.59 (d,  $J = 5.8$  Hz, 1H), 5.82 (d,  $J = 5.5$  Hz, 1H), 5.66 (d,  $J = 14.6$  Hz, 1H), 3.90 (s, 3H), 3.87 (s, 3H), 3.69 (d,  $J = 10.4$  Hz, 3H), 3.47 (d,  $J = 10.4$  Hz, 3H), 1.55 (s, 9H);  $^{13}\text{C}$  NMR (151 MHz,  $\text{CDCl}_3$ ) Signals corresponding to the major rotamer:  $\delta$  151.49, 149.04 (d,  $J = 3.7$  Hz), 148.21 (d,  $J = 2.6$  Hz), 124.43 (d,  $J = 4.5$  Hz), 124.00, 117.46, 111.03 (d,  $J = 4.7$  Hz), 108.49, 108.09 (d,  $J = 3.4$  Hz), 82.09, 56.19, 55.93, 53.40, 53.36 (d,  $J = 2.0$  Hz), 52.25 (d,  $J = 151.6$  Hz), 28.15; Signals corresponding to the minor rotamer:  $\delta$  151.64, 149.18 (d,  $J = 3.6$  Hz), 148.03 (d,  $J = 2.7$  Hz), 124.83 (d,  $J = 4.8$  Hz), 124.15, 117.10, 110.92 (d,  $J = 4.7$  Hz), 108.59, 108.13 (d,  $J = 3.5$  Hz), 82.23, 56.19, 55.93, 54.22 (d,  $J = 139.3$  Hz), 53.70 (d,  $J = 4.3$  Hz), 52.86 (d,  $J = 7.4$  Hz), 28.13  $^{31}\text{P}$  NMR (243 MHz,  $\text{CDCl}_3$ ):  $\delta$  22.43 (for major rotamer), 21.69 (for minor rotamer); HRMS ( $m/z$ ) calcd for  $\text{C}_{18}\text{H}_{26}\text{NO}_7\text{PNa}$   $[\text{M}+\text{Na}]^+$  422.1339, found 422.1339;  $[\alpha]_{\text{D}}^{25} = +165.6$  ( $c = 0.20$ ,  $\text{CHCl}_3$ ); The *ee* was determined by HPLC analysis (Chiralpak OD-3R,  $\text{CH}_3\text{CN}/\text{H}_2\text{O} = 40/60$ , v/v, 0.6 mL/min, 305 nm,  $t_{\text{R}}$  (major) = 6.9 min,  $t_{\text{R}}$  (minor) = 7.5 min), 55% *ee*.

## 1.4 Reaction conditions optimization for the enantioselective dearomatization of 1,2-dihydroisoquinoline-1-ylphenylphosphine oxides **6**:

### Further screening of solvents and additives<sup>a</sup>

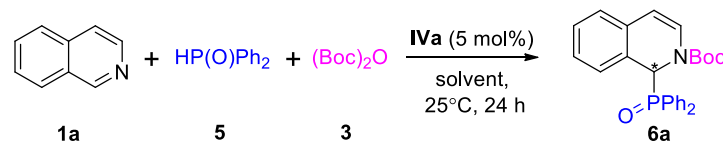

| Entry           | Solvent           | Conv. (%) <sup>b</sup> | ee (%) <sup>c</sup> |
|-----------------|-------------------|------------------------|---------------------|
| 1               | toluene           | >95                    | 59                  |
| 2               | benzene           | >95                    | 63                  |
| 3               | xylene            | 35                     | 21                  |
| 4               | PhOMe             | 90                     | 53                  |
| 5               | MTBE              | 87                     | 51                  |
| 6               | Et <sub>2</sub> O | 85                     | 46                  |
| 7               | THF               | 92                     | 14                  |
| 8               | 1,4-Dioxane       | >95                    | 23                  |
| 9 <sup>d</sup>  | benzene           | >95                    | 73                  |
| 10 <sup>e</sup> | benzene           | >95                    | 75                  |
| 11 <sup>f</sup> | benzene           | >95                    | 74                  |

<sup>a</sup>Reaction conditions: **1a** (0.2 mmol), **5** (0.4 mmol), **3** (0.4 mmol), and **IVa** (5 mol%) in solvent (4 mL) for 24 h (25 °C). <sup>b</sup>Yield was determined by HPLC analysis. <sup>c</sup>Determined by HPLC (Chiralcel OD-RH). <sup>d</sup>3Å MS (50mg) was used. <sup>e</sup>4Å MS (50mg) was used. <sup>f</sup>5Å MS (50mg) was used.

### Evaluation of Acylating Reagent

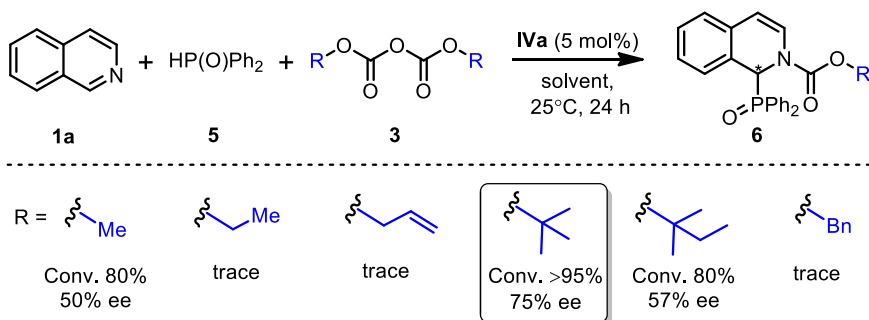

**Synthesis of 1,2-dihydroisoquinoline-1-ylphenylphosphine oxides **6**.** A mixture of isoquinoline **1** (0.2mmol), catalyst BINOL-CPAs **IVa** (5mol%), (Boc)<sub>2</sub>O **3** (0.4mmol) and benzene (4 mL) was stirred at room temperature for 2h. Then diphenylphosphine oxide **5** (0.4mmol) and 4Å MS (50mg) was added and the reaction was stirred at room temperature for 20 h. The reaction mixture was concentrated under reduced pressure. The residue was purified by flash column chromatography with PE/EA (1/2) to obtain 1,2-dihydroisoquinoline-1-ylphosphonates **6** as a white solid.

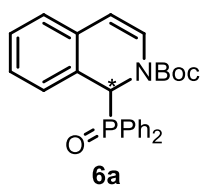

**Tert-butyl 1-(diphenylphosphoryl)isoquinoline-2(1H)-carboxylate 6a.** White solid 84 mg, yield 98%; m.p. 125-130°C; <sup>1</sup>H-NMR (600 MHz, C<sub>6</sub>D<sub>6</sub>): The compound exists as a 2:1 mixture of carbamate rotamers. Signals corresponding to the major rotamer: δ 8.15-8.09 (m, 2H), 8.00-7.94 (m, 2H), 7.07-6.95 (m, 6H), 6.90 (t, *J* = 7.5 Hz, 1H), 6.77 (dd, *J* = 15.8, 7.5 Hz, 2H), 6.71-6.67 (m, 2H), 6.52 (d, *J* = 7.5 Hz, 1H), 5.60 (d, *J* = 7.7 Hz, 1H), 1.23 (s, 9H); Signals corresponding to the minor rotamer: δ 7.85-7.79 (m, 2H), 7.77-7.72 (m, 2H), 7.31 (d, *J* = 7.8 Hz, 1H), 7.07-6.95 (m, 6H), 6.90 (t, *J* = 7.5 Hz, 1H), 6.82 (t, *J* = 7.5 Hz, 1H), 6.73-6.70 (m, 1H), 6.50 (d, *J* = 7.4 Hz, 1H), 6.38 (d, *J* = 10.0 Hz, 1H), 5.25 (d, *J* = 7.8 Hz, 1H), 1.36 (s, 9H); <sup>13</sup>C-NMR (151 MHz, C<sub>6</sub>D<sub>6</sub>): Signals corresponding to both rotamers: δ 151.94, 151.70, 133.34, 132.97, 132.95, 132.93, 132.86, 132.80, 132.73, 132.65, 132.59, 132.46, 132.40, 131.99, 131.93, 131.88, 131.56, 131.54, 131.52, 131.50, 131.45, 131.43, 131.29, 127.31, 127.28, 127.00, 126.98, 126.95, 126.90, 126.68, 126.62, 126.30, 125.24, 125.23, 110.84, 109.62, 81.95, 81.48, 60.62 (d, *J* = 67.2 Hz), 58.59 (d, *J* = 68.8 Hz), 28.00, 27.88; <sup>31</sup>P NMR (243 MHz, C<sub>6</sub>D<sub>6</sub>): δ 28.70 (for major rotamer), 25.71 (for minor rotamer); HRMS (*m/z*) calcd for C<sub>26</sub>H<sub>26</sub>NO<sub>3</sub>PNa [M+Na]<sup>+</sup> 454.1543, found 454.1541; [α]<sub>D</sub><sup>25</sup> = +255.9 (*c* = 0.20, CHCl<sub>3</sub>); The *ee* was determined by HPLC analysis (Chiralpak OD-RH, CH<sub>3</sub>CN/H<sub>2</sub>O = 50/50, v/v, 1.0 mL/min, 305 nm, *t<sub>R</sub>* (major) = 6.4 min, *t<sub>R</sub>* (minor) = 7.8 min), 75% *ee*.

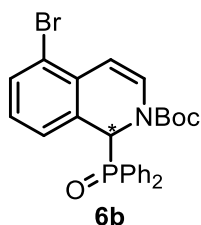

**Tert-butyl 5-bromo-1-(diphenylphosphoryl)isoquinoline-2(1H)-carboxylate 6b.** White solid 75 mg, yield 74%; m.p. 140-144°C; <sup>1</sup>H-NMR (600 MHz, C<sub>6</sub>D<sub>6</sub>): The compound exists as a 2.4:1 mixture of carbamate rotamers. Signals corresponding to the major rotamer: δ 8.09-7.99 (m, 2H), 7.99-7.89 (m, 2H), 7.12 (dt, *J* = 7.8, 1.4 Hz, 1H), 7.07-6.97 (m, 6H), 6.75 (dd, *J* = 7.9, 1.0 Hz, 1H), 6.55 (d, *J* = 4.4 Hz, 1H), 6.32 (d, *J* = 7.6 Hz, 1H), 6.30-6.26 (m, 1H), 6.14 (d, *J* = 7.9 Hz, 1H), 1.23 (s, 9H); Signals corresponding to the minor rotamer: δ 7.78-7.67 (m, 4H), 7.28 (d, *J* = 8.2 Hz, 1H), 7.07-6.97 (m, 6H), 6.96-6.92 (m, 1H), 6.69 (d, *J* = 7.5 Hz, 1H), 6.32 (d, *J* = 7.6 Hz, 1H), 6.24 (d, *J* = 10.4 Hz, 1H), 5.78 (d, *J* = 8.0 Hz, 1H), 1.34 (s, 9H); <sup>13</sup>C-NMR (151 MHz, C<sub>6</sub>D<sub>6</sub>): Signals corresponding to both rotamers: δ 151.55, 151.41, 132.88, 132.73, 132.68, 132.62, 132.59, 132.54, 132.44, 132.42, 132.40, 132.34, 132.26, 131.89, 131.83, 131.80, 131.76, 131.74, 131.62, 131.60, 131.44, 130.84, 128.68, 128.37, 126.38, 126.35, 126.10, 126.07, 120.92, 120.90, 120.81, 120.79, 109.39, 108.05, 82.33, 81.88, 60.81 (d, *J* = 66.3 Hz), 58.80 (d, *J* = 68.0 Hz), 27.94, 27.82; <sup>31</sup>P NMR (243 MHz, C<sub>6</sub>D<sub>6</sub>): δ 28.88 (for major rotamer), 26.14 (for minor rotamer); HRMS (*m/z*) calcd for C<sub>26</sub>H<sub>25</sub>BrNO<sub>3</sub>PNa [M+Na]<sup>+</sup> 532.0648, found 532.0648; [α]<sub>D</sub><sup>25</sup> = +216.7 (*c* = 0.20, CHCl<sub>3</sub>); The *ee* was determined by HPLC analysis (Chiralpak OD-RH, CH<sub>3</sub>CN/H<sub>2</sub>O = 50/50, v/v, 1.0 mL/min, 305 nm, *t<sub>R</sub>* (major) = 12.0 min, *t<sub>R</sub>* (minor) = 16.0 min), 78% *ee*.

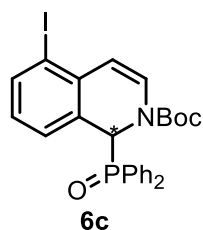

**Tert-butyl 1-(diphenylphosphoryl)-5-iodoisoquinoline-2(1H)-carboxylate 6c.** White solid 106 mg, yield 95%; m.p. 165-168°C; <sup>1</sup>H-NMR (600 MHz, C<sub>6</sub>D<sub>6</sub>): The compound exists as a 2:1 mixture of carbamate rotamers. Signals corresponding to the major rotamer: δ 8.08-7.98 (m, 2H), 7.95-7.86 (m, 2H), 7.39 (d, *J* = 8.0 Hz, 1H), 6.71 (d, *J* = 7.9 Hz, 1H), 6.51 (d, *J* = 4.7 Hz, 1H), 6.34 (d, *J* = 7.4 Hz, 1H), 6.12 (t, *J* = 7.7 Hz, 1H), 6.00 (d, *J* = 7.9 Hz, 1H), 1.24 (s, 9H); Signals corresponding to the minor rotamer: δ 7.77-7.71 (m, 2H), 7.70-7.64 (m, 2H), 7.34 (d, *J* = 7.9 Hz, 1H), 7.22 (d, *J* = 8.0 Hz, 1H), 6.96-6.93 (m, 1H), 6.69 (s, 1H), 6.19 (d, *J* = 10.4 Hz, 1H), 5.64 (d, *J* = 8.0 Hz, 1H), 1.34 (s, 9H); <sup>13</sup>C-NMR (151 MHz, C<sub>6</sub>D<sub>6</sub>): Signals corresponding to both rotamers: δ 151.53, 151.37, 139.09, 139.07, 135.57, 135.55, 132.90, 132.74, 132.68, 132.61, 132.55, 132.40, 132.33, 132.28, 131.89, 131.83, 131.79, 131.77, 131.73, 131.71, 131.61, 131.60, 131.37, 130.78, 128.99, 128.41, 127.05, 127.02, 114.22, 112.95, 96.68, 96.66, 82.33, 81.87, 61.07 (d, *J* = 66.3 Hz), 59.04 (d, *J* = 67.8 Hz), 27.95, 27.82; <sup>31</sup>P NMR (243 MHz, C<sub>6</sub>D<sub>6</sub>): δ 28.75 (for major rotamer), 26.09 (for minor rotamer); HRMS (m/z) calcd for C<sub>26</sub>H<sub>25</sub>INO<sub>3</sub>PNa [M+Na]<sup>+</sup> 580.0509, found 580.0509; [α]<sub>D</sub><sup>25</sup> = +223.6 (c = 0.20, CHCl<sub>3</sub>); The *ee* was determined by HPLC analysis (Chiralpak OD-RH, CH<sub>3</sub>CN/H<sub>2</sub>O = 60/40, v/v, 1.0 mL/min, 305 nm, t<sub>R</sub> (major) = 6.9 min, t<sub>R</sub> (minor) = 8.8 min), 77% *ee*.

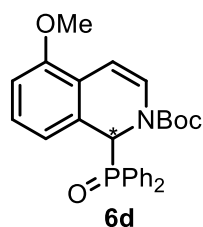

**Tert-butyl 1-(diphenylphosphoryl)-5-methoxyisoquinoline-2(1H)-carboxylate 6d.** White solid 76 mg, yield 82%; m.p. 163-165°C; <sup>1</sup>H-NMR (600 MHz, C<sub>6</sub>D<sub>6</sub>): The compound exists as a 2.3:1 mixture of carbamate rotamers. Signals corresponding to the major rotamer: δ 8.17-8.11 (m, 2H), 8.10-8.05 (m, 2H), 7.06-6.95 (m, 6H), 6.81 (dd, *J* = 7.8, 1.0 Hz, 1H), 6.73 (d, *J* = 3.6 Hz, 1H), 6.71-6.65 (m, 1H), 6.44 (d, *J* = 7.9 Hz, 1H), 6.28 (t, *J* = 9.2 Hz, 2H), 3.19 (s, 3H), 1.20 (s, 9H); Signals corresponding to the minor rotamer: δ 7.90-7.80 (m, 4H), 7.36 (dd, *J* = 8.0, 1.1 Hz, 1H), 7.06-6.95 (m, 6H), 6.72-6.70 (m, 1H), 6.70-6.66 (m, 1H), 6.42 (s, 1H), 6.24 (d, *J* = 8.1 Hz, 1H), 6.09 (d, *J* = 8.0 Hz, 1H), 3.12 (s, 3H), 1.32 (s, 9H); <sup>13</sup>C-NMR (151 MHz, C<sub>6</sub>D<sub>6</sub>): Signals corresponding to both rotamers: δ 154.63 (d, *J* = 2.7 Hz), 154.54 (d, *J* = 2.3 Hz), 151.91, 151.82, 133.50, 132.89, 132.83, 132.77, 132.65, 132.59, 132.46, 132.40, 132.24, 131.99, 131.93, 131.65, 131.55, 131.54, 131.46, 131.44, 131.38, 131.36, 125.97, 125.41, 122.38, 122.36, 122.20, 122.18, 119.86, 119.83, 119.45, 119.43, 110.48, 110.46, 105.80, 104.49, 81.79, 81.32, 60.71 (d, *J* = 67.0 Hz), 58.67 (d, *J* = 68.5 Hz), 55.07, 54.99, 27.99, 27.85; <sup>31</sup>P NMR (243 MHz, C<sub>6</sub>D<sub>6</sub>): δ 29.18 (for major rotamer), 26.53 (for minor rotamer); HRMS (m/z) calcd for C<sub>27</sub>H<sub>28</sub>NO<sub>4</sub>PNa [M+Na]<sup>+</sup> 484.1648, found 484.1652; [α]<sub>D</sub><sup>25</sup> = +203.1 (c = 0.20, CHCl<sub>3</sub>); The *ee* was determined by HPLC analysis (Chiralpak OD-RH, CH<sub>3</sub>CN/H<sub>2</sub>O = 50/50, v/v, 1.0 mL/min, 305 nm, t<sub>R</sub> (major) = 7.1 min, t<sub>R</sub> (minor) = 9.2 min), 78% *ee*.

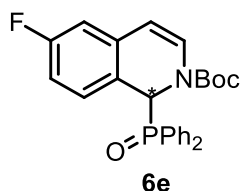

**Tert-butyl 1-(diphenylphosphoryl)-6-fluoroisoquinoline-2(1H)-carboxylate 6e.** White solid 80 mg, yield 90%; m.p. 130-133°C; <sup>1</sup>H-NMR (600 MHz, C<sub>6</sub>D<sub>6</sub>): The compound exists as a 2:1 mixture of carbamate rotamers. Signals corresponding to the major rotamer: δ 8.11-8.06 (m, 2H), 7.97-7.92 (m, 2H), 7.06-6.94 (m, 6H), 6.76 (d, *J* = 7.7 Hz, 1H), 6.57 (d, *J* = 3.2 Hz, 1H), 6.46 (dd, *J* = 9.2, 2.6 Hz, 1H), 6.39-6.32 (m, 1H), 6.30-6.25 (m, 1H), 5.39 (d, *J* = 7.7 Hz, 1H), 1.22 (s, 9H); Signals corresponding to the minor rotamer: δ 7.80-7.75 (m, 2H), 7.74-7.69 (m, 2H), 7.30-7.25 (m, 1H), 7.04-6.95 (m, 6H), 6.68-6.64 (m, 1H), 6.39-6.35 (m, 1H), 6.30-6.25 (m, 1H), 6.19 (dd, *J* = 9.2, 2.6 Hz, 1H), 5.03 (d, *J* = 7.8 Hz, 1H), 1.34 (s, 9H); <sup>13</sup>C-NMR (151 MHz, C<sub>6</sub>D<sub>6</sub>): Signals corresponding to both rotamers: δ 164.00 (d, *J* = 3.2 Hz), 162.38 (d, *J* = 3.1 Hz), 151.77, 151.54, 135.01, 133.06, 132.76, 132.70, 132.55, 132.50, 132.43, 132.37, 131.94, 131.88, 131.68, 131.67, 131.55, 131.53, 131.09, 127.55, 127.26, 122.16, 122.14, 113.40 (dd, *J* = 22.2, 1.9 Hz), 113.07 (dd, *J* = 22.2, 2.0 Hz), 111.93 (dd, *J* = 22.4, 2.0 Hz), 111.71 (d, *J* = 2.1 Hz), 109.90 (d, *J* = 2.2 Hz), 108.64 (d, *J* = 2.0 Hz), 82.22, 81.77, 60.02 (d, *J* = 67.7 Hz), 57.97 (d, *J* = 69.3 Hz), 27.95, 27.83; HRMS (*m/z*) calcd for C<sub>26</sub>H<sub>25</sub>FNO<sub>3</sub>PNa [M+Na]<sup>+</sup> 472.1448, found 472.1448; [α]<sub>D</sub><sup>25</sup> = +238.7 (*c* = 0.20, CHCl<sub>3</sub>); The *ee* was determined by HPLC analysis (Chiralpak OD-RH, CH<sub>3</sub>CN/H<sub>2</sub>O = 50/50, v/v, 1.0 mL/min, 305 nm, *t<sub>R</sub>* (major) = 7.3 min, *t<sub>R</sub>* (minor) = 8.4 min), 76% *ee*.

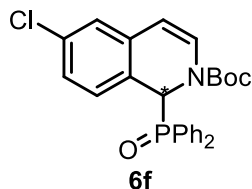

**Tert-butyl 6-chloro-1-(diphenylphosphoryl)isoquinoline-2(1H)-carboxylate 6f.** White solid 91 mg, yield 98%; m.p. 95-97°C; <sup>1</sup>H-NMR (600 MHz, C<sub>6</sub>D<sub>6</sub>): The compound exists as a 2:1 mixture of carbamate rotamers. Signals corresponding to the major rotamer: δ 8.11-8.04 (m, 2H), 7.97-7.91 (m, 2H), 7.05-6.94 (m, 6H), 6.76 (d, *J* = 2.1 Hz, 1H), 6.73 (dd, *J* = 7.7, 1.0 Hz, 1H), 6.64 (dd, *J* = 8.1, 2.2 Hz, 1H), 6.53 (d, *J* = 3.4 Hz, 1H), 6.22 (dd, *J* = 8.1, 1.9 Hz, 1H), 5.37 (d, *J* = 7.7 Hz, 1H), 1.21 (s, 9H); Signals corresponding to the minor rotamer: δ 7.80-7.73 (m, 2H), 7.73-7.67 (m, 2H), 7.25 (dd, *J* = 7.8, 1.1 Hz, 1H), 7.05-6.94 (m, 6H), 6.67 (dd, *J* = 8.1, 2.1 Hz, 1H), 6.58 (dd, *J* = 8.1, 2.1 Hz, 1H), 6.49 (d, *J* = 2.1 Hz, 1H), 6.23 (d, *J* = 8.6 Hz, 1H), 5.01 (d, *J* = 7.8 Hz, 1H), 1.34 (s, 9H); <sup>13</sup>C-NMR (151 MHz, C<sub>6</sub>D<sub>6</sub>): Signals corresponding to both rotamers: δ 151.71, 151.50, 134.64, 134.62, 134.31, 134.28, 132.90, 132.76, 132.71, 132.54, 132.48, 132.43, 132.37, 132.28, 131.94, 131.88, 131.75, 131.73, 131.71, 131.59, 131.57, 131.54, 130.95, 128.16, 128.00, 127.84, 127.32, 126.74, 126.72, 125.09, 125.07, 124.96, 124.91, 124.84, 109.66, 108.37, 82.27, 81.81, 60.07 (d, *J* = 67.2 Hz), 58.06 (d, *J* = 68.8 Hz), 27.94, 27.83; <sup>31</sup>P NMR (243 MHz, C<sub>6</sub>D<sub>6</sub>): δ 28.59 (for major rotamer), 25.36 (for minor rotamer); HRMS (*m/z*) calcd for C<sub>26</sub>H<sub>25</sub>ClNO<sub>3</sub>PNa [M+Na]<sup>+</sup> 488.1153, found 488.1155; [α]<sub>D</sub><sup>25</sup> = +219.0 (*c* = 0.20, CHCl<sub>3</sub>); The *ee* was determined by HPLC analysis (Chiralpak OD-RH, CH<sub>3</sub>CN/H<sub>2</sub>O = 50/50, v/v, 1.0 mL/min, 305 nm, *t<sub>R</sub>* (major) = 10.5 min, *t<sub>R</sub>* (minor) = 12.3 min), 76% *ee*.



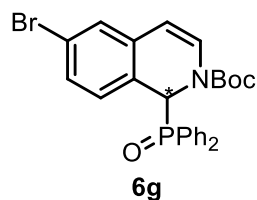

**Tert-butyl 6-bromo-1-(diphenylphosphoryl)isoquinoline-2(1H)-carboxylate 6g.** White solid 97 mg, yield 95%; m.p. 150-153°C; <sup>1</sup>H-NMR (600 MHz, C<sub>6</sub>D<sub>6</sub>): The compound exists as a 2.5:1 mixture of carbamate rotamers. Signals corresponding to the major rotamer: δ 8.10-8.05 (m, 2H), 7.96-7.91 (m, 2H), 7.05-6.94 (m, 6H), 6.92 (d, *J* = 2.0 Hz, 1H), 6.78 (dd, *J* = 8.0, 1.9 Hz, 1H), 6.74-6.71 (m, 1H), 6.51 (d, *J* = 3.6 Hz, 1H), 6.15 (dd, *J* = 8.1, 2.1 Hz, 1H), 5.35 (d, *J* = 7.7 Hz, 1H), 1.21 (s, 9H); Signals corresponding to the minor rotamer: δ 7.78-7.72 (m, 2H), 7.71-7.66 (m, 2H), 7.24 (d, *J* = 7.8 Hz, 1H), 7.05-6.94 (m, 6H), 6.82-6.80 (m, 1H), 6.65 (d, *J* = 2.0 Hz, 1H), 6.51 (d, *J* = 3.6 Hz, 1H), 6.21 (d, *J* = 9.6 Hz, 1H), 4.99 (d, *J* = 7.8 Hz, 1H), 1.34 (s, 9H); <sup>13</sup>C-NMR (151 MHz, C<sub>6</sub>D<sub>6</sub>): Signals corresponding to both rotamers: δ 151.70, 151.49, 134.94, 134.92, 132.87, 132.76, 132.70, 132.54, 132.48, 132.43, 132.40, 132.36, 132.25, 131.94, 131.88, 131.75, 131.73, 131.72, 131.60, 131.58, 131.49, 130.90, 129.67, 129.66, 129.33, 128.64, 128.62, 127.33, 125.36, 125.30, 122.48, 122.45, 122.42, 109.54, 108.24, 82.27, 81.82, 60.11 (d, *J* = 67.2 Hz), 58.11 (d, *J* = 68.6 Hz), 27.94, 27.82; <sup>31</sup>P NMR (243 MHz, C<sub>6</sub>D<sub>6</sub>): δ 28.49 (for major rotamer), 25.21 (for minor rotamer); HRMS (*m/z*) calcd for C<sub>26</sub>H<sub>25</sub>BrNO<sub>3</sub>PNa [M+Na]<sup>+</sup> 532.0648, found 532.0647; [α]<sub>D</sub><sup>25</sup> = +204.6 (*c* = 0.20, CHCl<sub>3</sub>); The *ee* was determined by HPLC analysis (Chiralpak OD-RH, CH<sub>3</sub>CN/H<sub>2</sub>O = 50/50, v/v, 1.0 mL/min, 305 nm, *t<sub>R</sub>* (major) = 11.9 min, *t<sub>R</sub>* (minor) = 14.1 min), 70% *ee*.

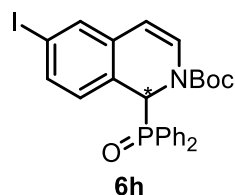

**Tert-butyl 1-(diphenylphosphoryl)-6-iodoisoquinoline-2(1H)-carboxylate 6h.** White solid 95 mg, yield 85%; m.p. 155-159°C; <sup>1</sup>H-NMR (600 MHz, C<sub>6</sub>D<sub>6</sub>): The compound exists as a 2.2:1 mixture of carbamate rotamers. Signals corresponding to the major rotamer: δ 8.11-8.03 (m, 2H), 7.96-7.89 (m, 2H), 7.12 (d, *J* = 1.5 Hz, 1H), 7.05-6.94 (m, 7H), 6.71 (d, *J* = 8.4 Hz, 1H), 6.49 (d, *J* = 3.5 Hz, 1H), 6.02 (dd, *J* = 8.0, 1.9 Hz, 1H), 5.33 (d, *J* = 7.7 Hz, 1H), 1.21 (s, 9H); Signals corresponding to the minor rotamer: δ 7.79-7.72 (m, 2H), 7.71-7.65 (m, 2H), 7.23 (d, *J* = 7.4 Hz, 1H), 7.05-6.94 (m, 7H), 6.86 (d, *J* = 1.4 Hz, 1H), 6.38 (dd, *J* = 7.9, 1.8 Hz, 1H), 6.20 (d, *J* = 9.6 Hz, 1H), 4.98 (d, *J* = 7.8 Hz, 1H), 1.34 (s, 9H); <sup>13</sup>C-NMR (151 MHz, C<sub>6</sub>D<sub>6</sub>): Signals corresponding to both rotamers: δ 151.71, 151.50, 135.71, 135.70, 135.38, 135.05, 135.04, 133.85, 133.83, 133.77, 132.91, 132.78, 132.72, 132.54, 132.49, 132.43, 132.36, 132.29, 131.95, 131.89, 131.74, 131.72, 131.69, 131.58, 131.57, 131.50, 130.91, 127.20, 125.99, 109.41, 108.11, 93.99, 93.96, 93.93, 93.90, 82.24, 81.79, 60.15 (d, *J* = 66.9 Hz), 58.17 (d, *J* = 68.6 Hz), 27.94, 27.84; <sup>31</sup>P NMR (243 MHz, C<sub>6</sub>D<sub>6</sub>): δ 28.43 (for major rotamer), 25.16 (for minor rotamer); HRMS (*m/z*) calcd for C<sub>26</sub>H<sub>25</sub>INO<sub>3</sub>PNa [M+Na]<sup>+</sup> 580.0509, found 580.0511; [α]<sub>D</sub><sup>25</sup> = +170.8 (*c* = 0.20, CHCl<sub>3</sub>); The *ee* was determined by HPLC analysis (Chiralpak OD-RH, CH<sub>3</sub>CN/H<sub>2</sub>O = 60/40, v/v, 1.0 mL/min, 305 nm, *t<sub>R</sub>* (major) = 15.0 min, *t<sub>R</sub>* (minor) = 17.1 min), 76% *ee*.

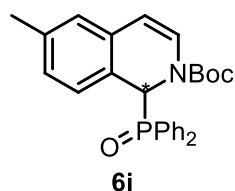

**Tert-butyl 1-(diphenylphosphoryl)-6-methylisoquinoline-2(1H)-carboxylate 6i.** White solid 71 mg, yield 80%; m.p. 155-157°C; <sup>1</sup>H-NMR (600 MHz, C<sub>6</sub>D<sub>6</sub>): The compound exists as a 2:1 mixture of carbamate rotamers. Signals corresponding to the major rotamer: δ 8.19-8.10 (m, 2H), 8.06-7.98 (m, 2H), 7.09-6.97 (m, 6H), 6.85-6.79 (m, 1H), 6.70 (d, *J* = 2.9 Hz, 1H), 6.61 (s, 1H), 6.53 (d, *J* = 7.6 Hz, 1H), 6.46 (dd, *J* = 7.7, 1.7 Hz, 1H), 5.65 (d, *J* = 7.7 Hz, 1H), 1.96 (s, 3H), 1.22 (s, 9H); Signals corresponding to the minor rotamer: δ 7.90-7.82 (m, 2H), 7.82-7.74 (m, 2H), 7.34 (d, *J* = 7.8 Hz, 1H), 7.09-6.97 (m, 6H), 6.85-6.79 (m, 1H), 6.56 (d, *J* = 7.7 Hz, 1H), 6.39 (d, *J* = 9.4 Hz, 1H), 6.35 (s, 1H), 5.29 (d, *J* = 7.8 Hz, 1H), 1.93 (s, 3H), 1.36 (s, 9H); <sup>13</sup>C-NMR (151 MHz, C<sub>6</sub>D<sub>6</sub>): Signals corresponding to both rotamers: δ 151.99, 151.73, 138.07, 137.95, 137.94, 133.64, 133.45, 132.91, 132.86, 132.83, 132.65, 132.60, 132.48, 132.42, 132.10, 132.04, 131.98, 131.54, 131.52, 131.48, 131.40, 131.38, 127.17, 127.14, 126.83, 126.80, 126.78, 126.19, 126.12, 126.10, 126.06, 123.79, 123.68, 111.09, 109.81, 81.87, 81.40, 60.42 (d, *J* = 67.7 Hz), 58.37 (d, *J* = 69.6 Hz), 28.00, 27.88, 21.04, 20.96; <sup>31</sup>P NMR (243 MHz, C<sub>6</sub>D<sub>6</sub>): δ 28.65 (for major rotamer), 25.56 (for minor rotamer); HRMS (*m/z*) calcd for C<sub>27</sub>H<sub>28</sub>NO<sub>3</sub>PNa [M+Na]<sup>+</sup> 468.1699, found 468.1698; [α]<sub>D</sub><sup>25</sup> = +225.8 (*c* = 0.20, CHCl<sub>3</sub>); The *ee* was determined by HPLC analysis (Chiralpak OD-RH, CH<sub>3</sub>CN/H<sub>2</sub>O = 50/50, v/v, 1.0 mL/min, 305 nm, *t<sub>R</sub>* (major) = 8.3 min, *t<sub>R</sub>* (minor) = 9.9 min), 75% *ee*.

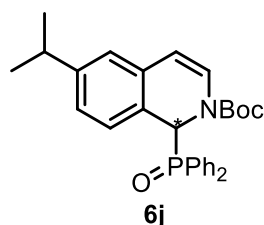

**Tert-butyl 1-(diphenylphosphoryl)-6-isopropylisoquinoline-2(1H)-carboxylate 6j.** White solid 86 mg, yield 91%; m.p. 162-165°C; <sup>1</sup>H-NMR (600 MHz, C<sub>6</sub>D<sub>6</sub>): The compound exists as a 2:1 mixture of carbamate rotamers. Signals corresponding to the major rotamer: δ 8.17-8.09 (m, 2H), 7.99-7.92 (m, 2H), 7.07-6.96 (m, 6H), 6.85 (d, *J* = 8.3 Hz, 1H), 6.72 (s, 1H), 6.61 (dd, *J* = 7.8, 1.6 Hz, 1H), 6.53 (dd, *J* = 7.8, 1.8 Hz, 1H), 5.63 (d, *J* = 7.7 Hz, 1H), 2.60-2.54 (m, 1H), 1.26 (s, 9H), 1.04 (dd, *J* = 6.9, 5.8 Hz, 6H); Signals corresponding to the minor rotamer: δ 7.86-7.79 (m, 2H), 7.77-7.71 (m, 2H), 7.35 (d, *J* = 8.3 Hz, 1H), 7.07-6.96 (m, 6H), 6.90-6.87 (m, 1H), 6.72 (d, *J* = 4.1 Hz, 1H), 6.63 (dd, *J* = 7.8, 1.5 Hz, 1H), 6.46-6.43 (m, 1H), 6.41 (d, *J* = 9.5 Hz, 1H), 5.29 (d, *J* = 7.8 Hz, 1H), 2.54-2.49 (m, 1H), 1.37 (s, 9H), 1.02 (dd, *J* = 6.9, 2.9 Hz, 6H); <sup>13</sup>C-NMR (151 MHz, C<sub>6</sub>D<sub>6</sub>): Signals corresponding to both rotamers: δ 151.71, 151.49, 149.09 (d, *J* = 3.1 Hz), 148.74 (d, *J* = 2.9 Hz), 133.46, 133.26, 132.65, 132.62, 132.57, 132.41, 132.36, 132.15, 132.09, 131.72, 131.66, 131.64, 131.14, 131.12, 131.10, 131.07, 131.05, 130.47, 129.88, 126.61, 126.59, 126.46, 125.93, 124.83, 124.81, 124.49, 124.47, 123.94, 123.92, 123.19, 123.17, 123.16, 110.74, 109.50, 81.56, 81.10, 60.06 (d, *J* = 67.5 Hz), 58.05 (d, *J* = 69.2 Hz), 33.76, 27.72, 27.58, 23.68 (d, *J* = 24.9 Hz), 23.61 (d, *J* = 17.5 Hz); <sup>31</sup>P NMR (243 MHz, C<sub>6</sub>D<sub>6</sub>): δ 28.46 (for major rotamer), 25.84 (for minor rotamer); HRMS (*m/z*) calcd for C<sub>29</sub>H<sub>32</sub>NO<sub>3</sub>PNa [M+Na]<sup>+</sup> 496.2012, found 496.2013; [α]<sub>D</sub><sup>25</sup> = +181.8 (*c* = 0.20, CHCl<sub>3</sub>); The *ee* was determined by HPLC analysis (Chiralpak OD-RH, CH<sub>3</sub>CN/H<sub>2</sub>O

= 50/50, v/v, 1.0 mL/min, 305 nm,  $t_R$  (major) = 12.2 min,  $t_R$  (minor) = 14.2 min), 72% *ee*.

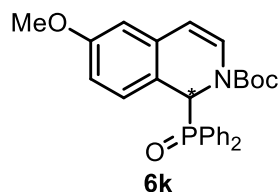

**Tert-butyl 1-(diphenylphosphoryl)-6-methoxyisoquinoline-2(1H)-carboxylate 6k.** White solid 89 mg, yield 96%; m.p. 140-144°C;  $^1\text{H-NMR}$  (600 MHz,  $\text{C}_6\text{D}_6$ ): The compound exists as a 2:1 mixture of carbamate rotamers. Signals corresponding to the major rotamer:  $\delta$  8.18-8.11 (m, 2H), 8.05-7.98 (m, 2H), 7.10-6.96 (m, 6H), 6.86-6.79 (m, 1H), 6.68 (d,  $J = 2.6$  Hz, 1H), 6.50 (d,  $J = 2.5$  Hz, 1H), 6.46 (dd,  $J = 8.3, 2.0$  Hz, 1H), 6.33 (dd,  $J = 8.3, 2.6$  Hz, 1H), 5.60 (d,  $J = 7.7$  Hz, 1H), 3.19 (s, 3H), 1.23 (s, 9H); Signals corresponding to the minor rotamer:  $\delta$  7.89-7.83 (m, 2H), 7.82-7.76 (m, 2H), 7.34 (d,  $J = 7.8$  Hz, 1H), 7.10-6.96 (m, 6H), 6.86-6.79 (m, 1H), 6.38 (d,  $J = 8.4$  Hz, 2H), 6.24 (d,  $J = 2.6$  Hz, 1H), 5.24 (d,  $J = 7.8$  Hz, 1H), 3.17 (s, 3H), 1.36 (s, 9H);  $^{13}\text{C-NMR}$  (151 MHz,  $\text{C}_6\text{D}_6$ ): Signals corresponding to both rotamers:  $\delta$  160.35 (d,  $J = 2.6$  Hz), 160.25 (d,  $J = 2.4$  Hz), 151.99, 151.70, 134.30, 134.21, 134.19, 133.70, 133.51, 132.92, 132.90, 132.86, 132.66, 132.60, 132.48, 132.42, 132.15, 132.04, 131.98, 131.56, 131.53, 131.51, 131.49, 131.39, 131.37, 127.24, 126.60, 118.75, 118.64, 112.56, 112.25, 110.93, 110.91, 110.75, 110.73, 109.63, 81.92, 81.45, 60.11 (d,  $J = 68.6$  Hz), 58.08 (d,  $J = 70.2$  Hz), 54.73, 54.67, 28.00, 27.89;  $^{31}\text{P NMR}$  (243 MHz,  $\text{C}_6\text{D}_6$ ):  $\delta$  28.43 (for major rotamer), 25.39 (for minor rotamer); HRMS ( $m/z$ ) calcd for  $\text{C}_{27}\text{H}_{28}\text{NO}_4\text{PNa}$  [ $\text{M}+\text{Na}$ ] $^+$  484.1648, found 484.1647;  $[\alpha]_D^{25} = +180.0$  ( $c = 0.20$ ,  $\text{CHCl}_3$ ); The *ee* was determined by HPLC analysis (Chiralpak OD-RH,  $\text{CH}_3\text{CN}/\text{H}_2\text{O} = 50/50$ , v/v, 1.0 mL/min, 305 nm,  $t_R$  (major) = 6.7 min,  $t_R$  (minor) = 7.5 min), 62% *ee*.

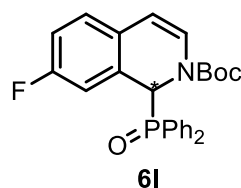

**Tert-butyl 1-(diphenylphosphoryl)-7-fluoroisoquinoline-2(1H)-carboxylate 6l.** White solid 86 mg, yield 96%; m.p. 162-165°C;  $^1\text{H-NMR}$  (600 MHz,  $\text{C}_6\text{D}_6$ ): The compound exists as a 2.3:1 mixture of carbamate rotamers. Signals corresponding to the major rotamer:  $\delta$  8.14-8.06 (m, 2H), 8.01-7.94 (m, 2H), 7.05-6.95 (m, 6H), 6.71 (d,  $J = 7.7$  Hz, 1H), 6.60-6.55 (m, 1H), 6.55-6.51 (m, 2H), 6.23-6.19 (m, 1H), 5.55 (d,  $J = 7.7$  Hz, 1H), 1.21 (s, 9H); Signals corresponding to the minor rotamer:  $\delta$  7.82-7.72 (m, 4H), 7.24 (d,  $J = 7.8$  Hz, 1H), 7.05-6.95 (m, 6H), 6.95-6.91 (m, 1H), 6.60-6.55 (m, 1H), 6.51-6.47 (m, 1H), 6.28-6.24 (m, 1H), 5.19 (d,  $J = 7.8$  Hz, 1H), 1.33 (s, 9H);  $^{13}\text{C-NMR}$  (151 MHz,  $\text{C}_6\text{D}_6$ ): Signals corresponding to both rotamers:  $\delta$  162.76 (d,  $J = 2.8$  Hz), 161.13 (d,  $J = 2.5$  Hz), 151.78, 151.63, 132.86, 132.70, 132.65, 132.43, 132.38, 132.37, 132.24, 131.88, 131.82, 131.80, 131.78, 131.69, 131.68, 131.66, 131.59, 131.57, 131.55, 131.00, 129.20, 129.18, 129.16, 128.76, 128.73, 128.71, 128.68, 128.50, 128.43, 126.59, 126.57, 126.54, 126.52, 126.48, 126.46, 126.24, 126.23, 125.56, 125.55, 115.11, 115.10, 114.97, 114.95, 114.61, 114.59, 114.46, 114.43, 114.26, 114.23, 114.10, 114.08, 82.08, 81.60, 60.45 (dd,  $J = 66.2, 2.2$  Hz), 58.40 (dd,  $J = 67.9, 2.5$  Hz), 27.95, 27.83;  $^{31}\text{P NMR}$  (243 MHz,  $\text{C}_6\text{D}_6$ ):  $\delta$  28.92 (for major rotamer), 25.84 (for minor rotamer); HRMS ( $m/z$ ) calcd for  $\text{C}_{26}\text{H}_{25}\text{FNO}_3\text{PNa}$  [ $\text{M}+\text{Na}$ ] $^+$  472.1448, found 472.1451;  $[\alpha]_D^{25} = +203.6$  ( $c = 0.20$ ,  $\text{CHCl}_3$ ); The *ee* was determined by HPLC analysis (Chiralpak OD-

3R, CH<sub>3</sub>CN/H<sub>2</sub>O = 50/50, v/v, 0.6 mL/min, 305 nm, t<sub>R</sub> (major) = 10.9 min, t<sub>R</sub> (minor) = 11.9 min), 62% *ee*.

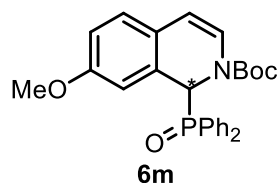

**Tert-butyl 1-(diphenylphosphoryl)-7-methoxyisoquinoline-2(1H)-carboxylate 6m.** White solid 76 mg, yield 82%; m.p. 175-178°C; <sup>1</sup>H-NMR (600 MHz, C<sub>6</sub>D<sub>6</sub>): The compound exists as a 2.4:1 mixture of carbamate rotamers. Signals corresponding to the major rotamer: δ 8.18-8.10 (m, 2H), 8.05-7.97 (m, 2H), 7.07-6.95 (m, 6H), 6.73 (dd, *J* = 7.6, 4.0 Hz, 1H), 6.67 (d, *J* = 4.2 Hz, 1H), 6.62-6.59 (m, 1H), 6.60-6.54 (m, 1H), 6.18 (s, 1H), 5.65 (d, *J* = 7.6 Hz, 1H), 3.06 (s, 3H), 1.23 (s, 9H); Signals corresponding to the minor rotamer: δ 7.87-7.80 (m, 4H), 7.23 (d, *J* = 7.8 Hz, 1H), 7.07-6.95 (m, 6H), 6.94-6.91 (m, 1H), 6.73 (dd, *J* = 7.6, 4.0 Hz, 1H), 6.48 (d, *J* = 8.3 Hz, 1H), 6.38 (d, *J* = 10.9 Hz, 1H), 5.31 (d, *J* = 7.7 Hz, 1H), 3.15 (s, 3H), 1.34 (s, 9H); <sup>13</sup>C-NMR (151 MHz, C<sub>6</sub>D<sub>6</sub>): Signals corresponding to both rotamers: δ 159.11 (d, *J* = 2.6 Hz), 159.01 (d, *J* = 2.4 Hz), 151.97, 151.90, 133.24, 132.88, 132.83, 132.66, 132.62, 132.60, 132.48, 132.42, 132.09, 131.98, 131.92, 131.60, 131.58, 131.51, 131.50, 131.45, 131.42, 131.40, 126.51, 126.49, 125.96, 125.93, 124.51, 124.06, 114.70, 114.68, 114.46, 114.44, 112.70, 112.68, 112.49, 112.46, 110.85, 109.62, 81.76, 81.30, 61.18 (d, *J* = 67.1 Hz), 58.90 (d, *J* = 68.9 Hz), 54.75, 54.58, 28.01, 27.88; <sup>31</sup>P NMR (243 MHz, C<sub>6</sub>D<sub>6</sub>): δ 28.51 (for major rotamer), 25.88 (for minor rotamer); HRMS (*m/z*) calcd for C<sub>27</sub>H<sub>28</sub>NO<sub>4</sub>PNa [M+Na]<sup>+</sup> 484.1648, found 484.1650; [α]<sub>D</sub><sup>25</sup> = +131.2 (*c* = 0.20, CHCl<sub>3</sub>); The *ee* was determined by HPLC analysis (Chiralpak OD-3R, CH<sub>3</sub>CN/H<sub>2</sub>O = 50/50, v/v, 0.6 mL/min, 305 nm, t<sub>R</sub> (major) = 9.8 min, t<sub>R</sub> (minor) = 10.8 min), 74% *ee*.

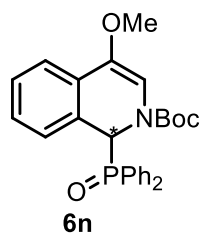

**Tert-butyl 1-(diphenylphosphoryl)-4-methoxyisoquinoline-2(1H)-carboxylate 6n.** White solid 89 mg, yield 96%; m.p. 168-170°C; <sup>1</sup>H-NMR (600 MHz, C<sub>6</sub>D<sub>6</sub>): The compound exists as a 1.5:1 mixture of carbamate rotamers. Signals corresponding to the major rotamer: δ 8.21-8.15 (m, 2H), 7.97-7.91 (m, 2H), 7.58 (d, *J* = 7.6 Hz, 1H), 7.09-6.93 (m, 7H), 6.72 (d, *J* = 8.2 Hz, 2H), 6.55 (d, *J* = 7.6 Hz, 1H), 6.25 (s, 1H), 3.29 (s, 3H), 1.32 (s, 9H); Signals corresponding to the minor rotamer: δ 7.85-7.78 (m, 4H), 7.37 (d, *J* = 7.6 Hz, 1H), 7.09-6.93 (m, 8H), 6.79 (t, *J* = 7.5 Hz, 1H), 6.73 (d, *J* = 5.4 Hz, 1H), 6.36 (d, *J* = 10.8 Hz, 1H), 3.04 (s, 3H), 1.41 (s, 9H); <sup>13</sup>C-NMR (151 MHz, C<sub>6</sub>D<sub>6</sub>): Signals corresponding to both rotamers: δ 152.40, 152.15, 145.05, 144.32, 133.42, 133.37, 132.80, 132.76, 132.74, 132.68, 132.42, 132.37, 132.31, 132.12, 131.98, 131.92, 131.53, 131.51, 131.02, 131.00, 130.94, 130.84, 126.99, 126.96, 126.71, 126.68, 121.71, 121.69, 121.60, 121.58, 104.61, 104.36, 81.39, 80.99, 60.56 (d, *J* = 65.8 Hz), 58.10 (d, *J* = 68.6 Hz), 55.46, 54.91, 28.15, 28.05; <sup>31</sup>P NMR (243 MHz, C<sub>6</sub>D<sub>6</sub>): δ 28.04 (for major rotamer), 24.79 (for minor rotamer); HRMS (*m/z*) calcd for C<sub>27</sub>H<sub>28</sub>NO<sub>4</sub>PNa [M+Na]<sup>+</sup> 484.1648, found 484.1652; [α]<sub>D</sub><sup>25</sup> = +352.1 (*c* = 0.20, CHCl<sub>3</sub>); The *ee* was determined by HPLC analysis (Chiralpak OD-

RH, CH<sub>3</sub>CN/H<sub>2</sub>O = 50/50, v/v, 1.0 mL/min, 305 nm, t<sub>R</sub> (major) = 6.4 min, t<sub>R</sub> (minor) = 8.0 min), 76% *ee*.

### 1.5 Procedure for the preparation of diethyl (*S*)-(1,2,3,4-tetrahydroisoquinolin-1-yl)phosphonate **8**:

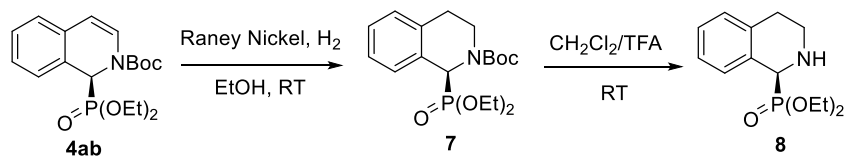

To a solution of tert-butyl 1-(diethoxyphosphoryl)isoquinoline-2(1*H*)-carboxylate **4ab** (0.1 mmol) in 5 ml EtOH was added Raney Nickel, the mixture was stirred under hydrogen atmosphere (1 atm) at room temperature for 10 h. The mixture was filtered through Celite, the solution was concentrated under reduced pressure to obtain **7**.

To a solution of **7** in 2 ml CH<sub>2</sub>Cl<sub>2</sub> was added TFA 0.1 ml, the mixture was stirred at room temperature for 3 h. The reaction mixture was concentrated under reduced pressure. The residue was purified by flash column chromatography to obtain (*S*)-(1,2,3,4-tetrahydroisoquinolin-1-yl) phosphonate **8** as a colorless oil (24 mg, 0.089 mmol; 2steps 89% yield). <sup>1</sup>H NMR (300 MHz, CDCl<sub>3</sub>) δ 7.59 – 7.43 (m, 1H), 7.14 (dt, *J* = 7.1, 4.9 Hz, 3H), 4.47 (d, *J* = 16.3 Hz, 1H), 4.20 – 3.96 (m, 3H), 3.89 (dd, *J* = 8.2, 7.1 Hz, 1H), 3.40 (ddd, *J* = 12.2, 6.1, 2.1 Hz, 1H), 3.09 – 2.93 (m, 1H), 2.83 (dt, *J* = 5.8, 2.8 Hz, 2H), 2.19 (s, 1H), 1.28 (t, *J* = 7.1 Hz, 3H), 1.15 (t, *J* = 7.1 Hz, 3H). <sup>13</sup>C NMR (75 MHz, CDCl<sub>3</sub>): δ 135.69 (d, *J* = 6.8 Hz), 129.93 (d, *J* = 3.9 Hz), 129.42 (d, *J* = 2.5 Hz), 128.00 (d, *J* = 4.1 Hz), 126.85 (d, *J* = 3.4 Hz), 125.62 (d, *J* = 3.3 Hz), 62.94 (d, *J* = 7.2 Hz), 62.18 (d, *J* = 7.3 Hz), 54.42 (d, *J* = 145.2 Hz), 40.86 (d, *J* = 5.9 Hz), 29.38, 16.43 (d, *J* = 6.3 Hz), 16.31 (d, *J* = 6.3 Hz); <sup>31</sup>P NMR (121 MHz, CDCl<sub>3</sub>): δ 24.62; The *ee* was determined by HPLC analysis (Phenomenex C-1 column, Hexane/IPA = 90/10, v/v, 1.0 mL/min, 210 nm, t<sub>R</sub> (major) = 8.6 min, t<sub>R</sub> (minor) = 15.0 min), 79% *ee*. [α]<sub>D</sub><sup>22</sup> = +23.1 (c = 1.00, CHCl<sub>3</sub>) for an enantiomerically. (The *ee* was determined by HPLC analysis (Phenomenex C-1 column, Hexane/IPA = 90/10, v/v, 1.0 mL/min, 210 nm, t<sub>R</sub> (major) = 9.2 min, t<sub>R</sub> (minor) = 13.9 min), 75% *ee*. [α]<sub>D</sub><sup>22</sup> = +19.3 (c = 1.00, CHCl<sub>3</sub>) for an enantiomerically. *Chem. Sci.* 2016, **7**, 6940-6945)

### 1.6 Procedure for the preparation of tert-butyl 1-(tert-butoxy)isoquinoline-2(1*H*)-carboxylate **A**:

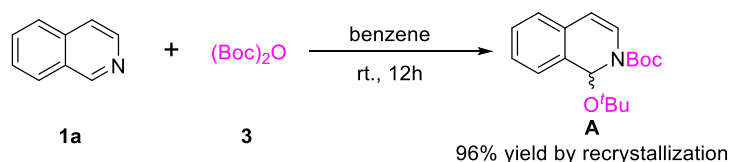

A mixture of isoquinoline (3.87 g, 30 mmol) and Boc<sub>2</sub>O (7.86g, 36 mmol) in benzene (30 mL) was stirred at room temperature for 12 h. After concentration in vacuo, the residue was purified by recrystallization from Et<sub>2</sub>O-hexane to give **A** (8.79g, 96%). <sup>1</sup>H NMR (300 MHz, Chloroform-*d*) δ 7.37 – 7.15 (m, 4H), 6.88 (dd, *J* = 7.6, 1.5 Hz, 1H), 6.66 (d, *J* = 1.5 Hz, 1H), 6.10 (d, *J* = 7.6 Hz, 1H), 1.52 (s, 9H), 1.30 (s, 9H). HRMS (m/z) calcd for C<sub>18</sub>H<sub>25</sub>NO<sub>3</sub>Na [M+Na]<sup>+</sup> 326.1732, found 326.1728.

## 2. NMR spectrum of 1,2-dihydroisoquinoline-1-ylphosphonates 4

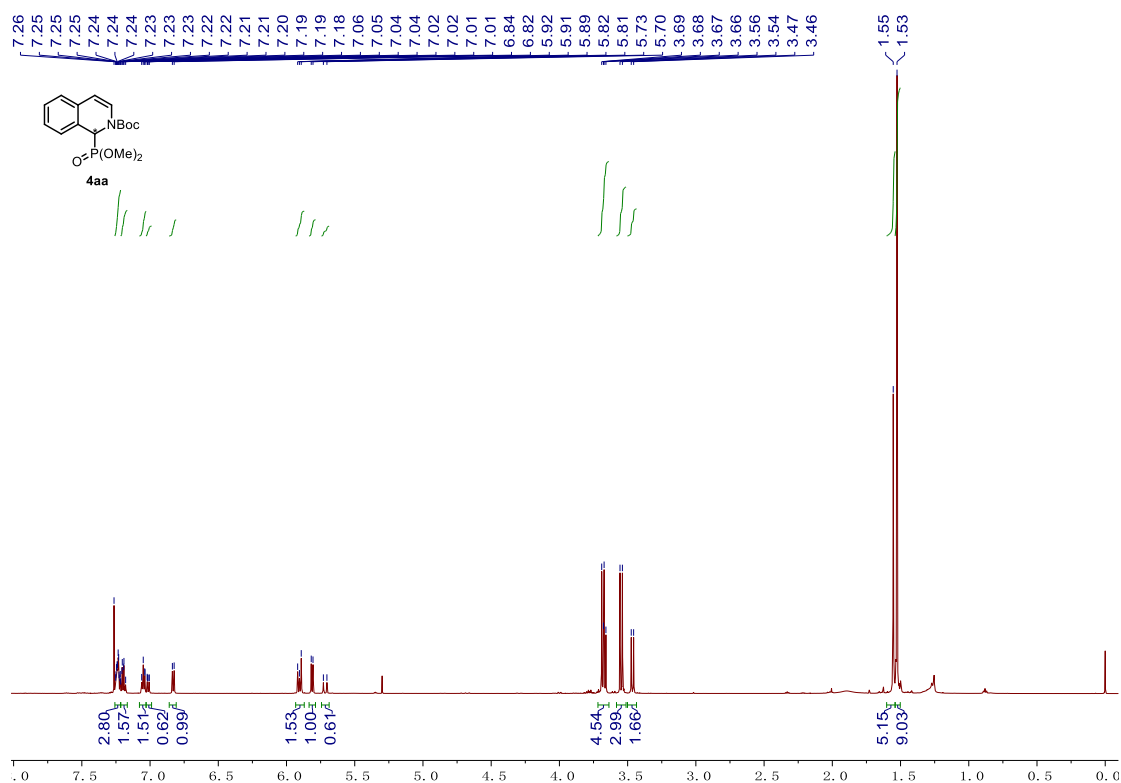

Fig.S 1 <sup>1</sup>H NMR of compound 4aa

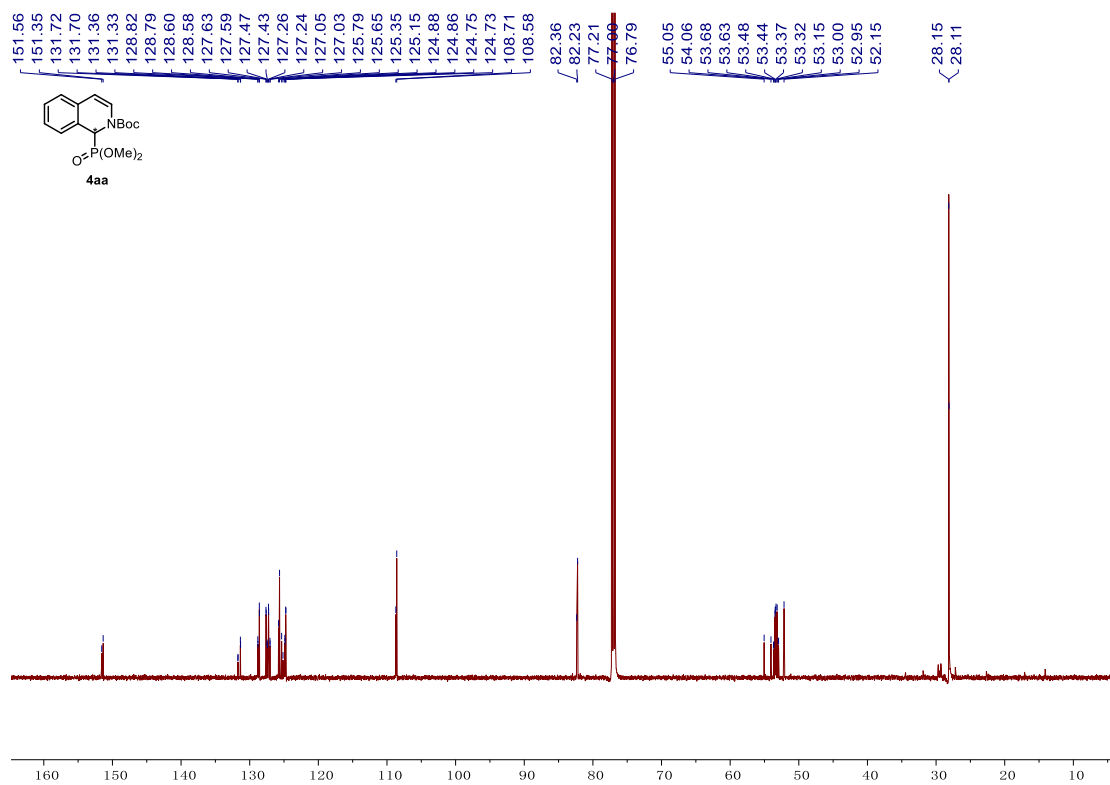

Fig.S 2 <sup>13</sup>C NMR of compound 4aa

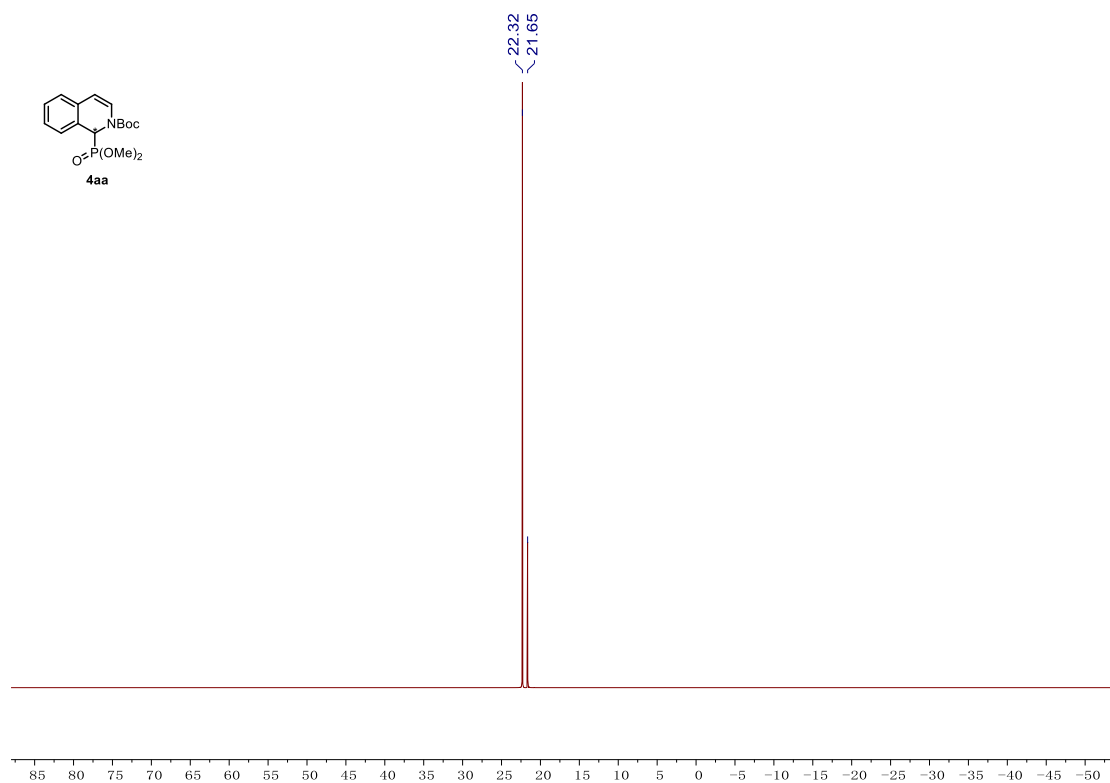

Fig.S 3  $^{31}\text{P}$  NMR of compound **4aa**

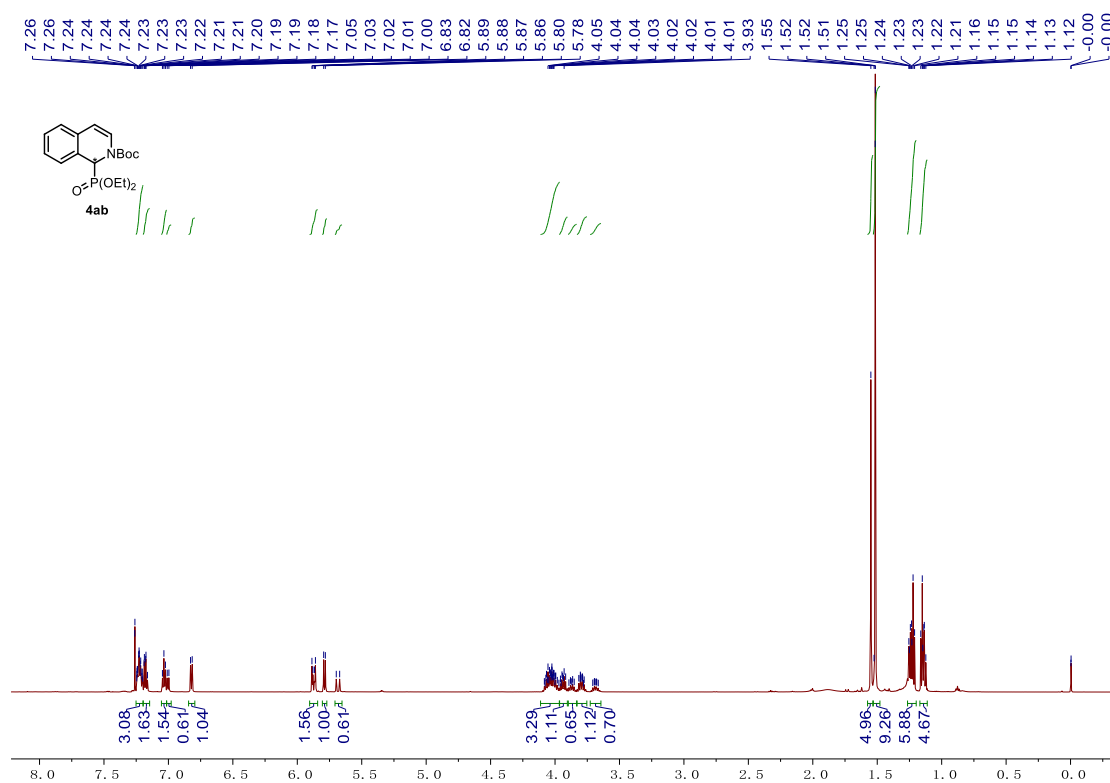

Fig.S 4  $^1\text{H}$  NMR of compound **4ab**

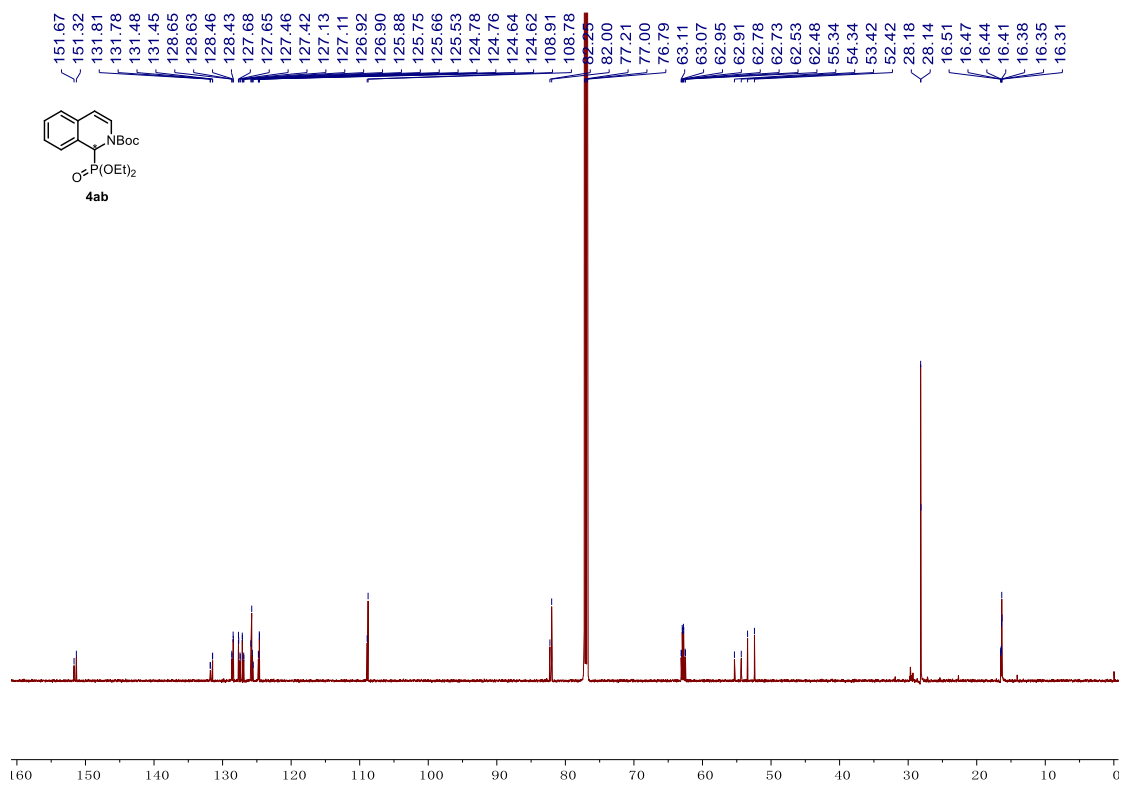

Fig.S 5  $^{13}\text{C}$  NMR of compound **4ab**

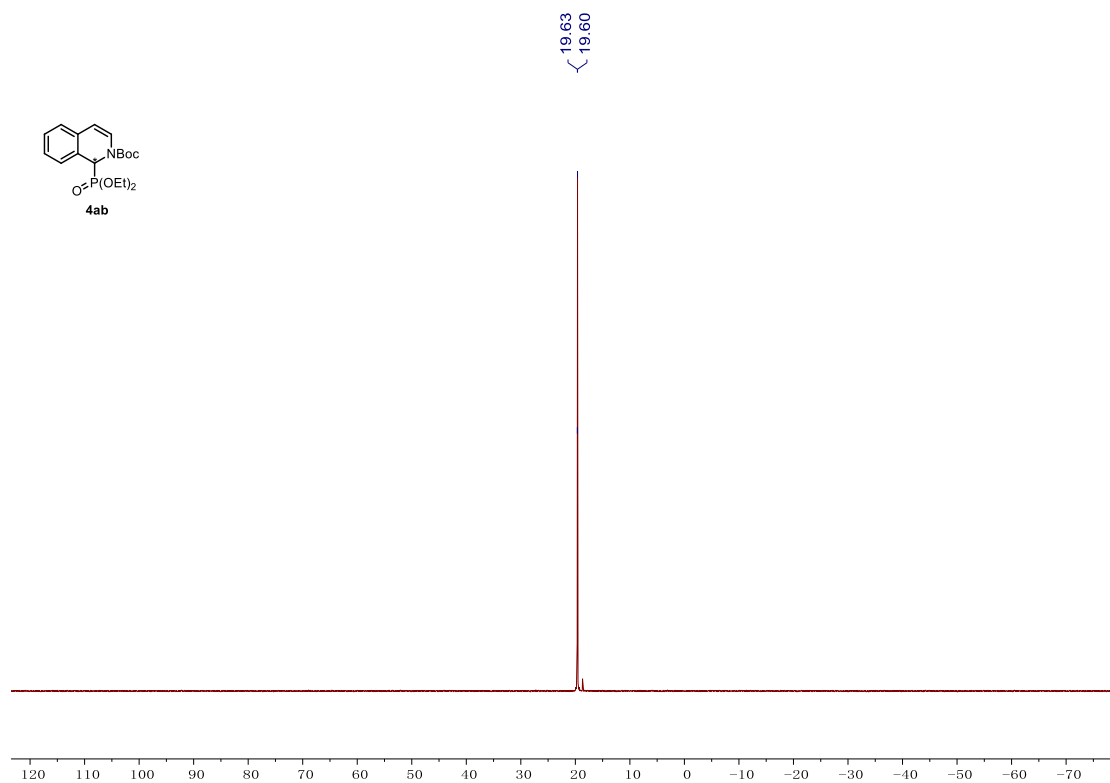

Fig.S 6  $^{31}\text{P}$  NMR of compound **4ab**



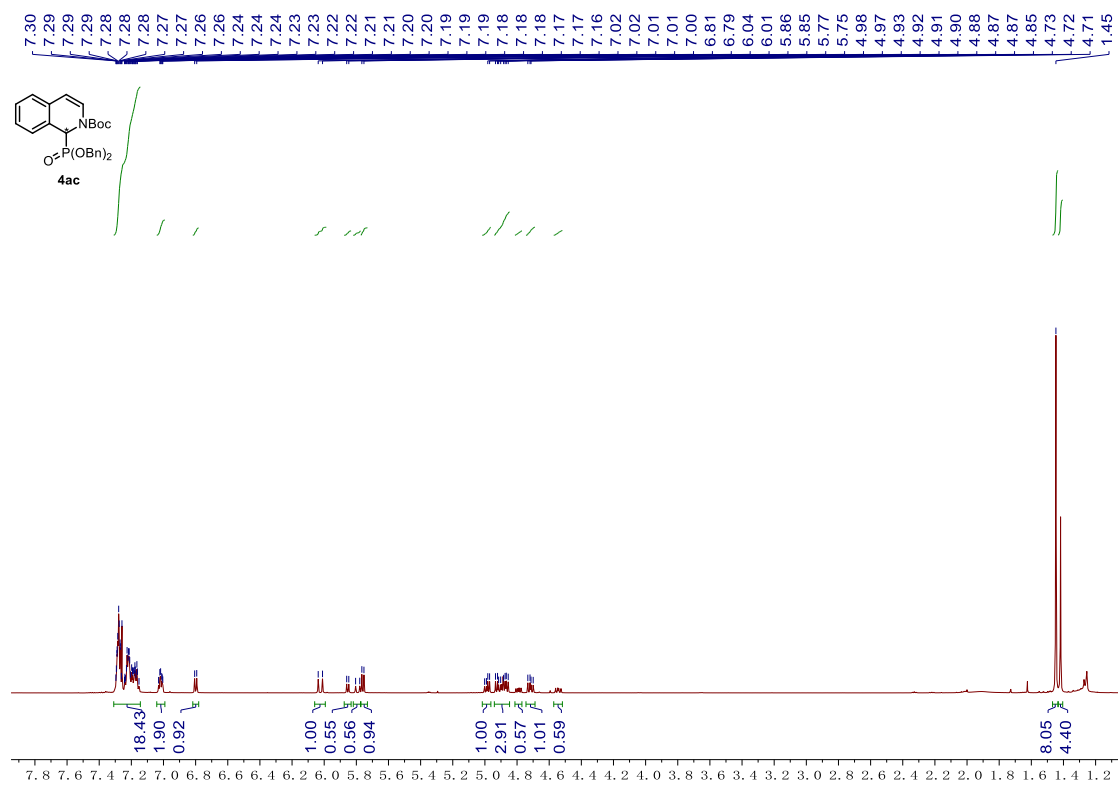

Fig.S 7 <sup>1</sup>H NMR of compound **4ac**

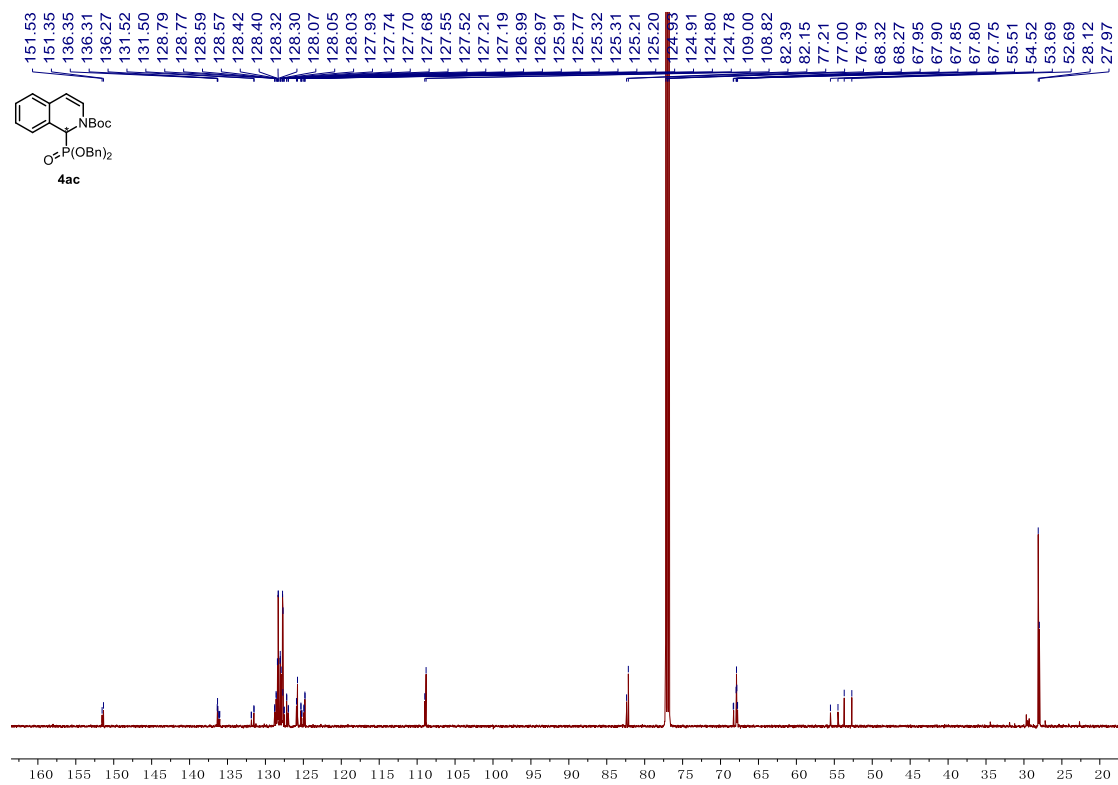

Fig.S 8 <sup>13</sup>C NMR of compound **4ac**

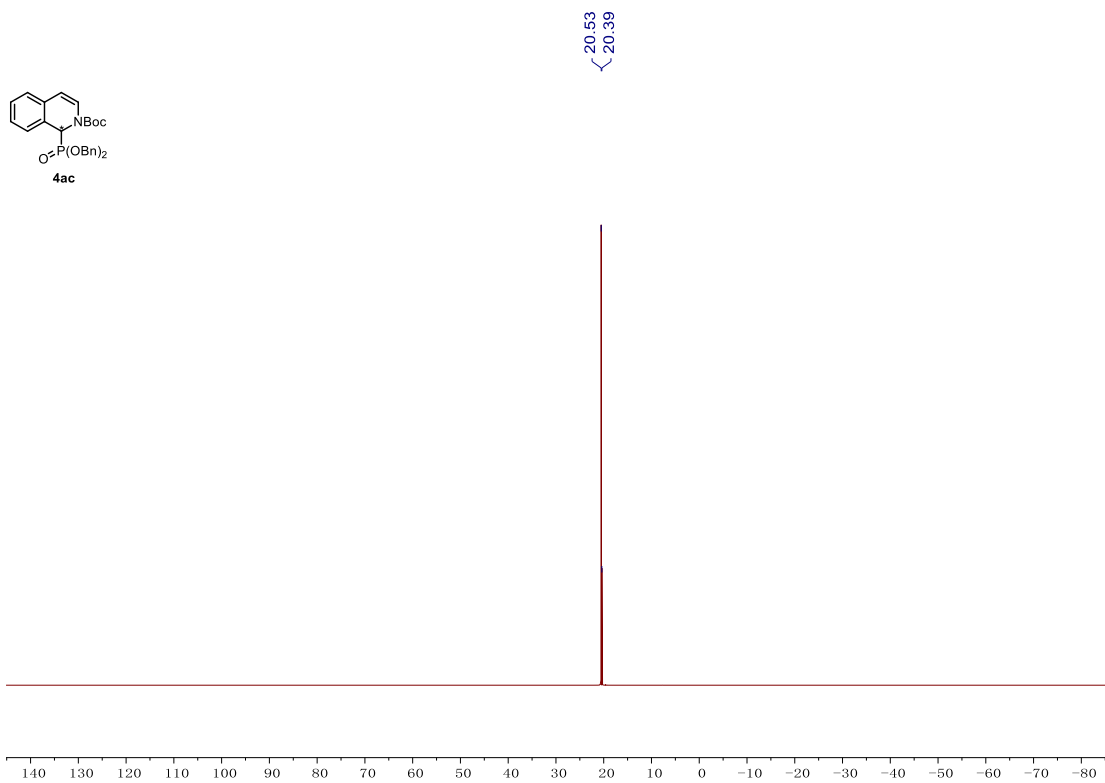

Fig.S 9  $^{31}\text{P}$  NMR of compound **4ac**

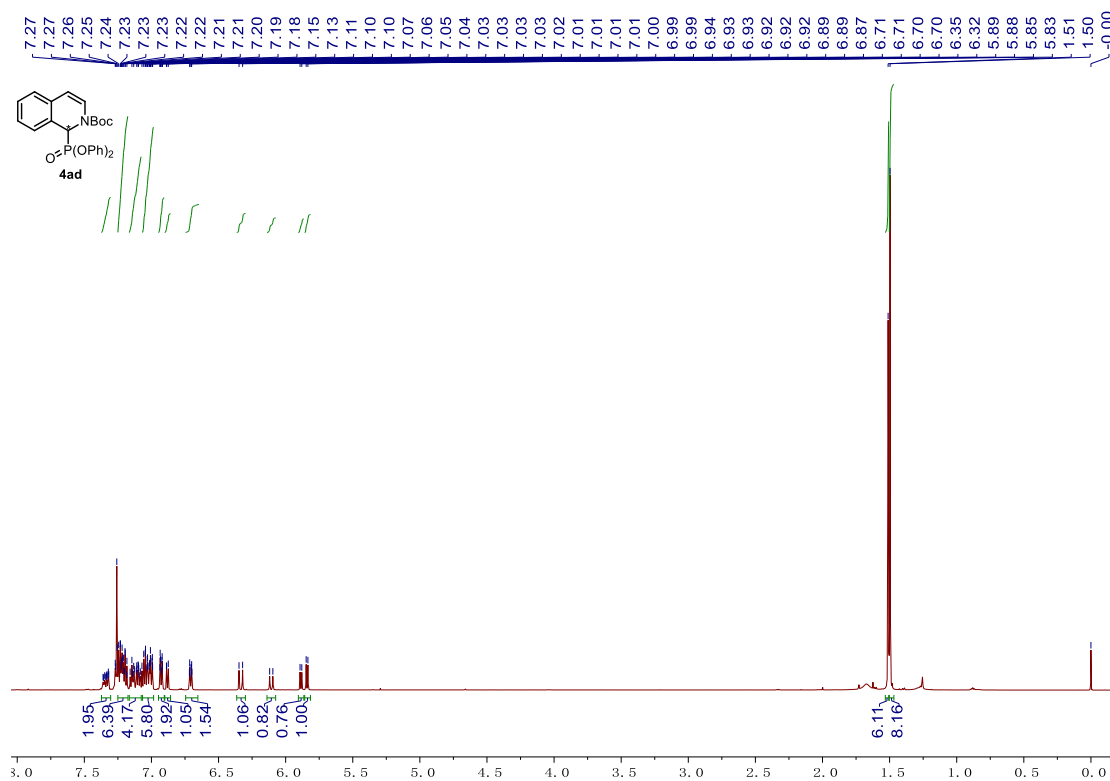

Fig.S 10  $^1\text{H}$  NMR of compound **4ad**

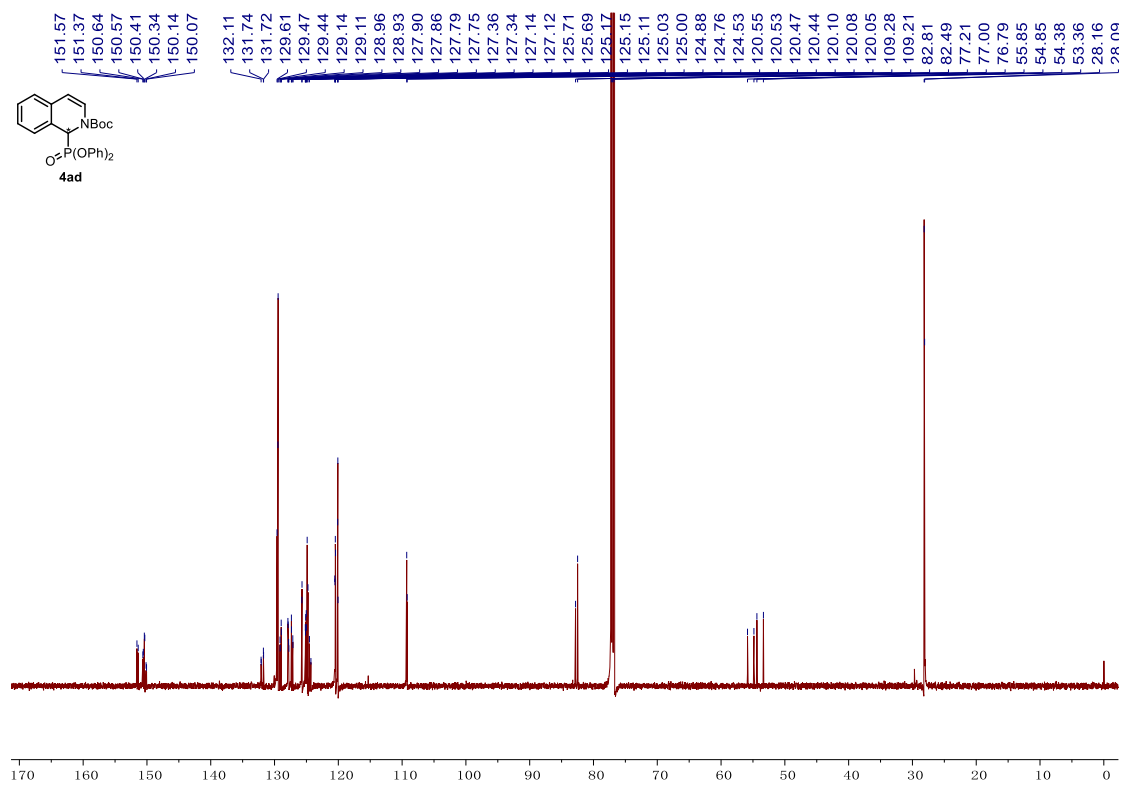

Fig.S 11 <sup>13</sup>C NMR of compound **4ad**

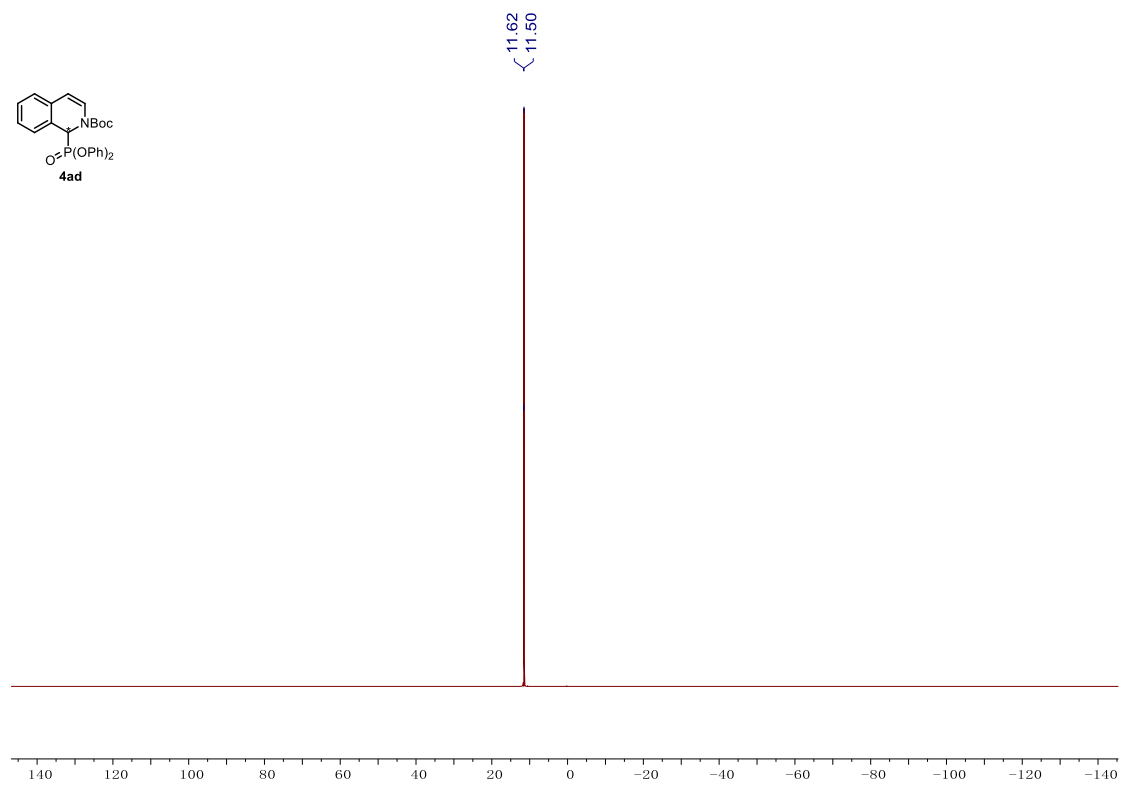

Fig.S 12 <sup>31</sup>P NMR of compound **4ad**

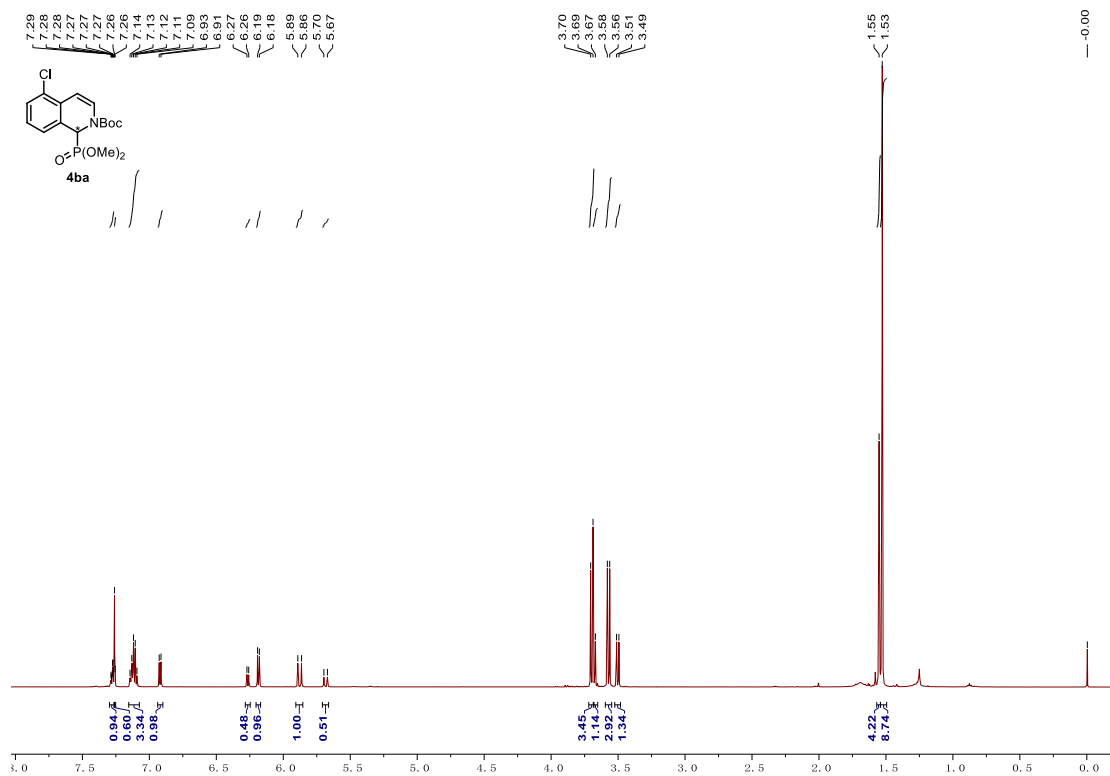

Fig.S 13 <sup>1</sup>H NMR of compound 4ba

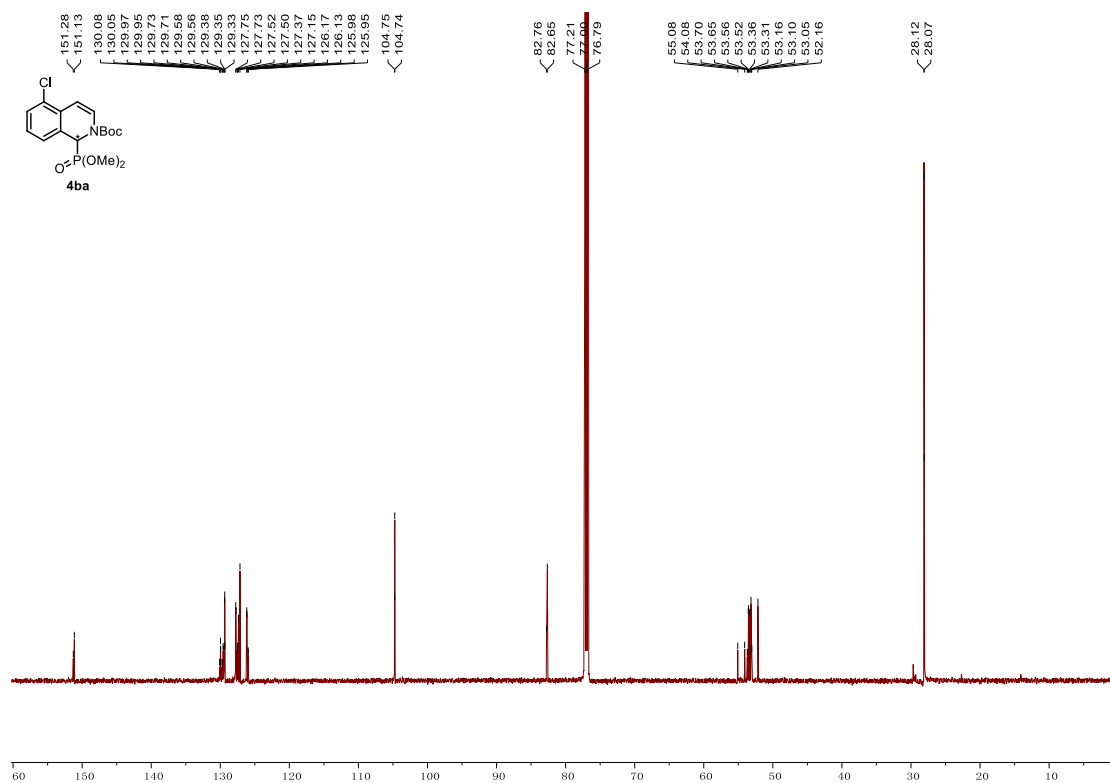

Fig.S 14 <sup>13</sup>C NMR of compound 4ba

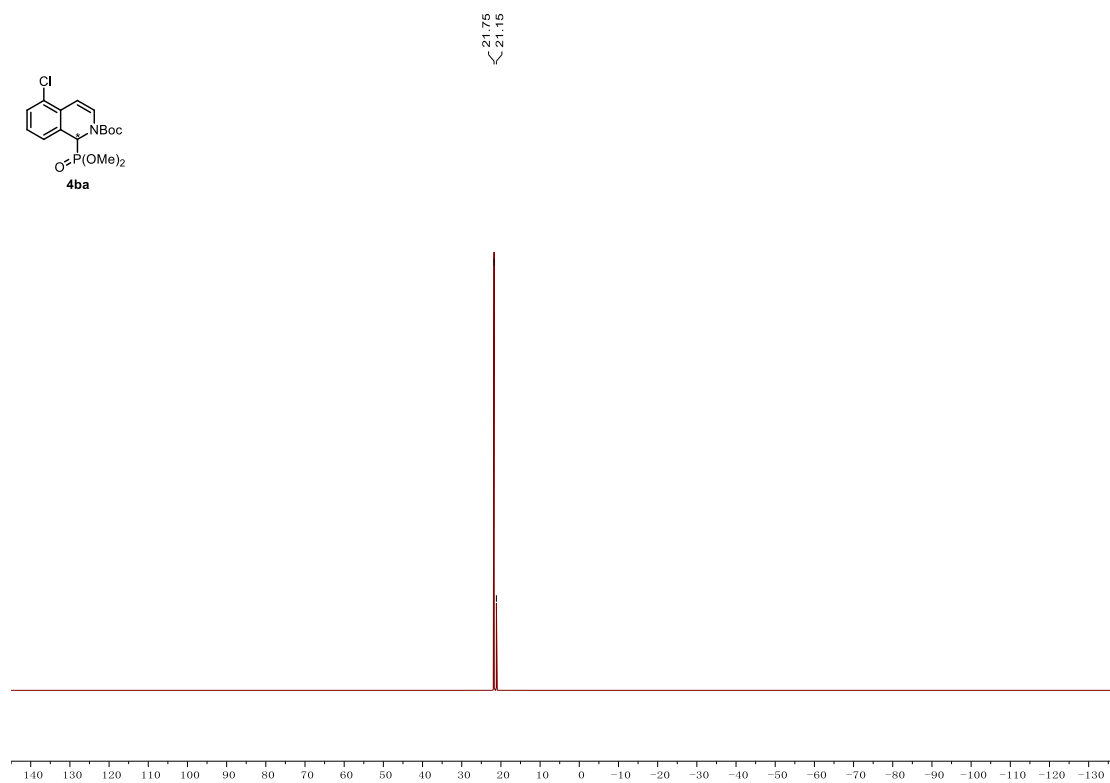

Fig.S 15  $^{31}\text{P}$  NMR of compound **4ba**

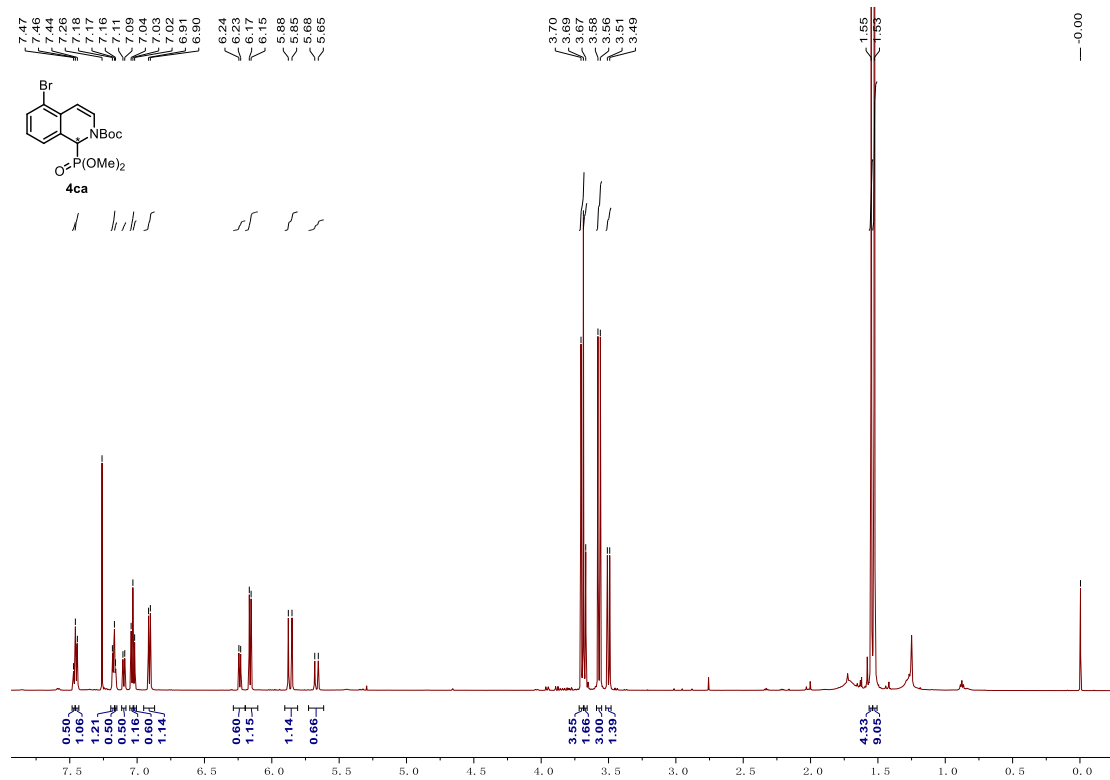

Fig.S 16  $^1\text{H}$  NMR of compound **4ca**

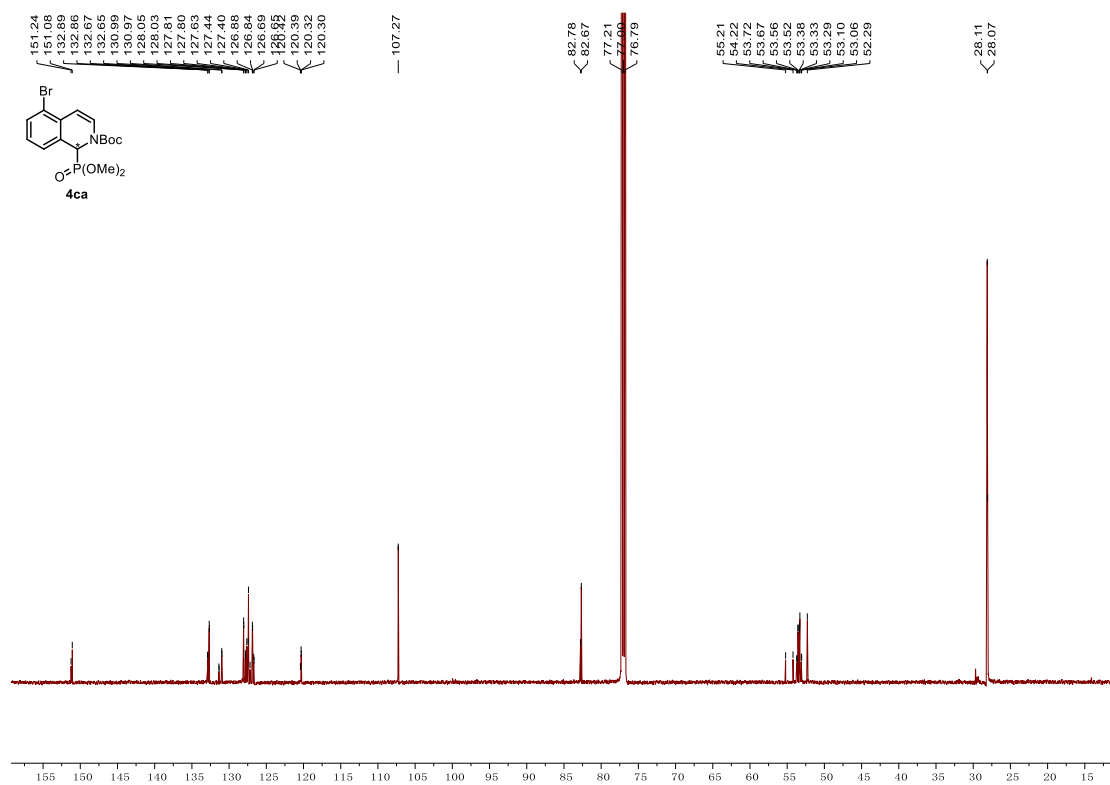

Fig.S 17 <sup>13</sup>C NMR of compound **4ca**

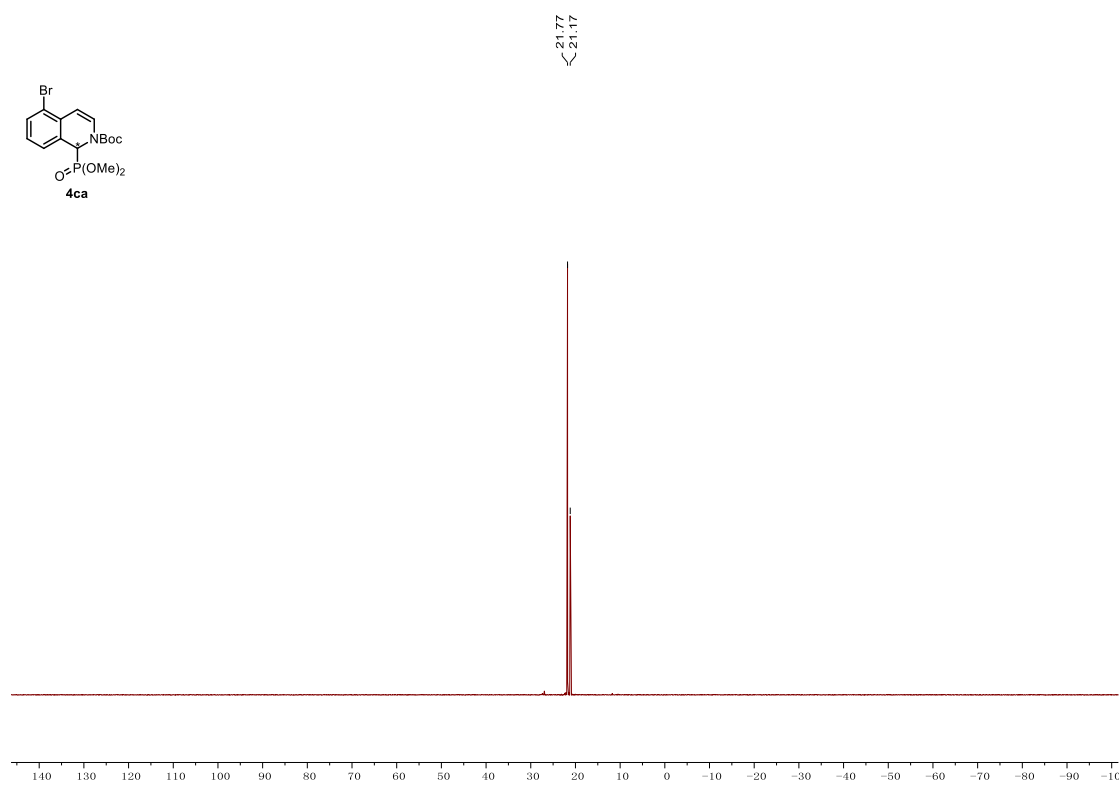

Fig.S 18 <sup>31</sup>P NMR of compound **4ca**

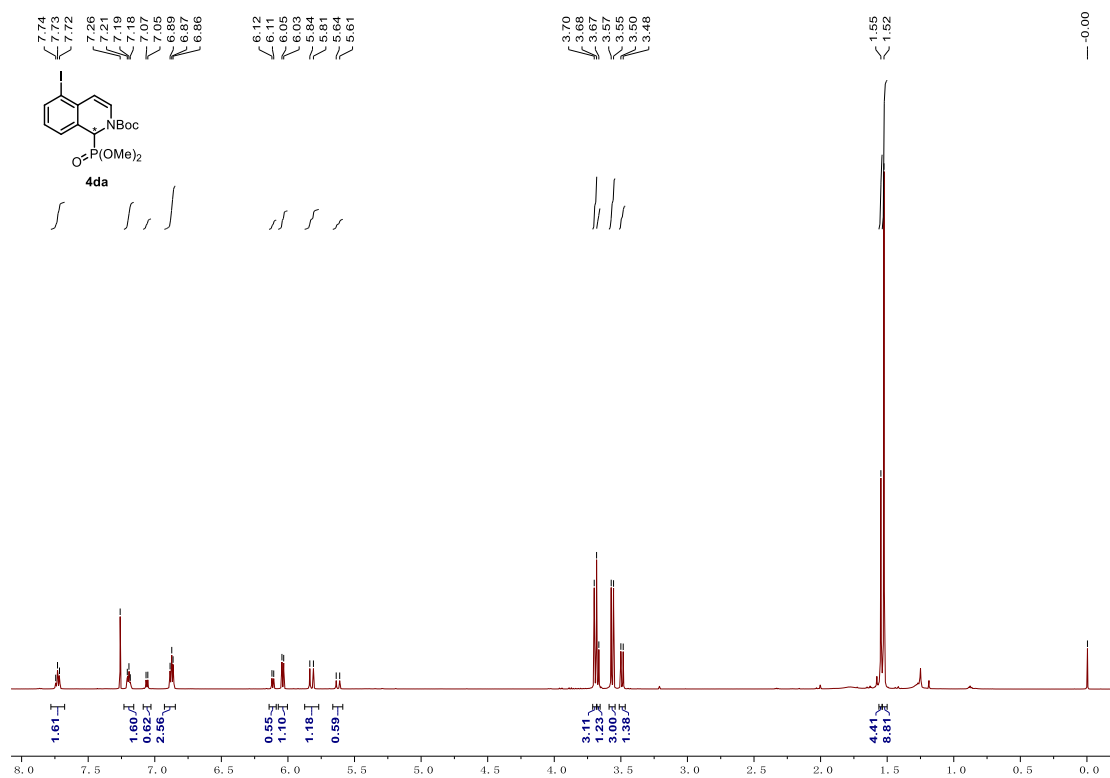

Fig.S 19  $^1\text{H}$  NMR of compound 4da

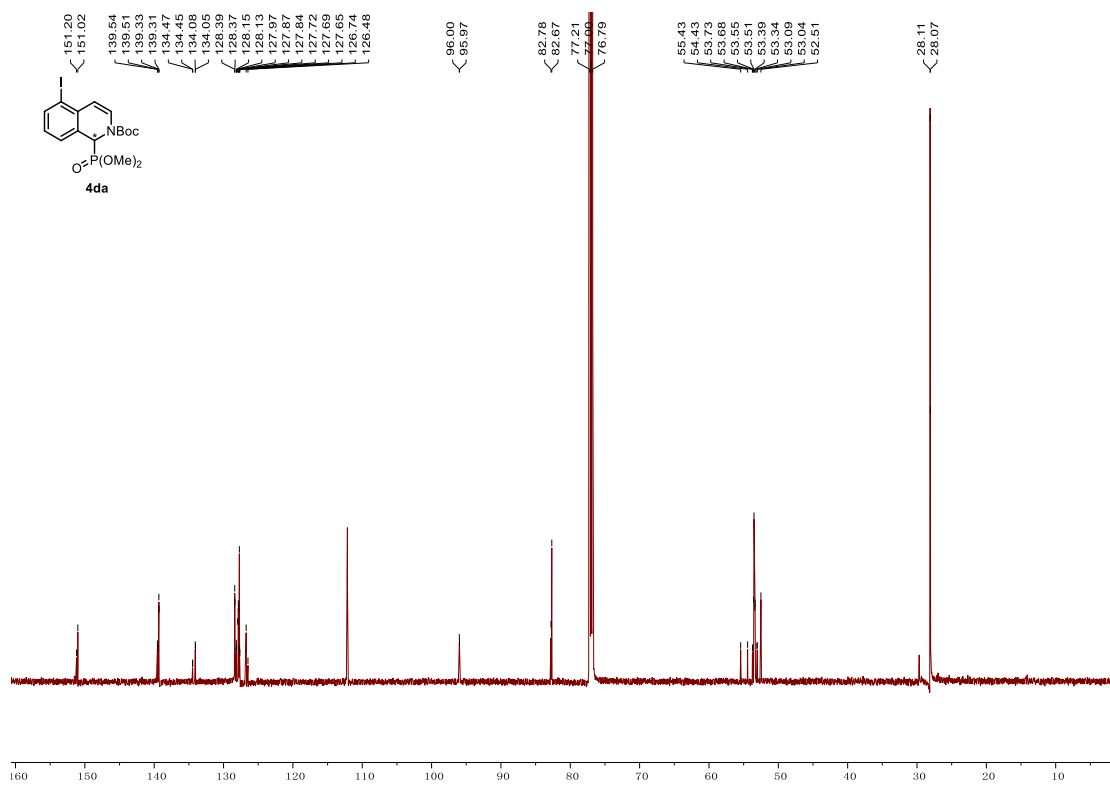

Fig.S 20  $^{13}\text{C}$  NMR of compound 4da

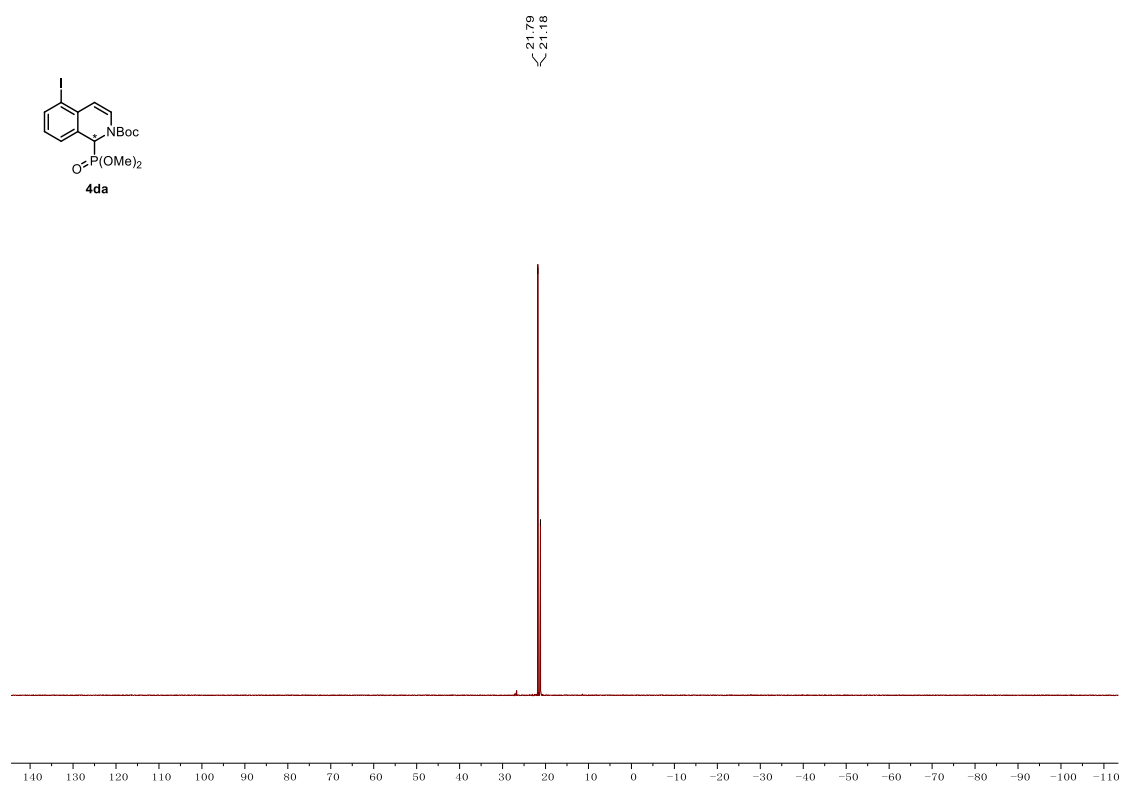

Fig.S 21  $^{31}\text{P}$  NMR of compound **4da**

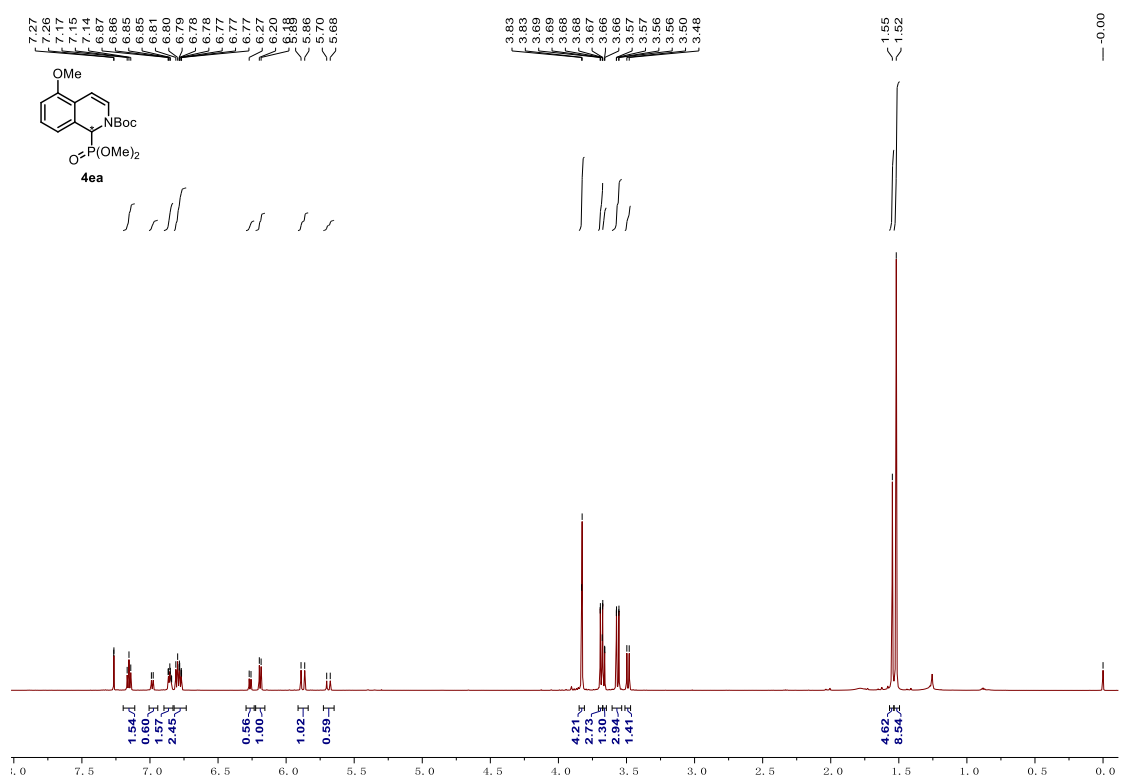

Fig.S 22  $^1\text{H}$  NMR of compound **4ea**



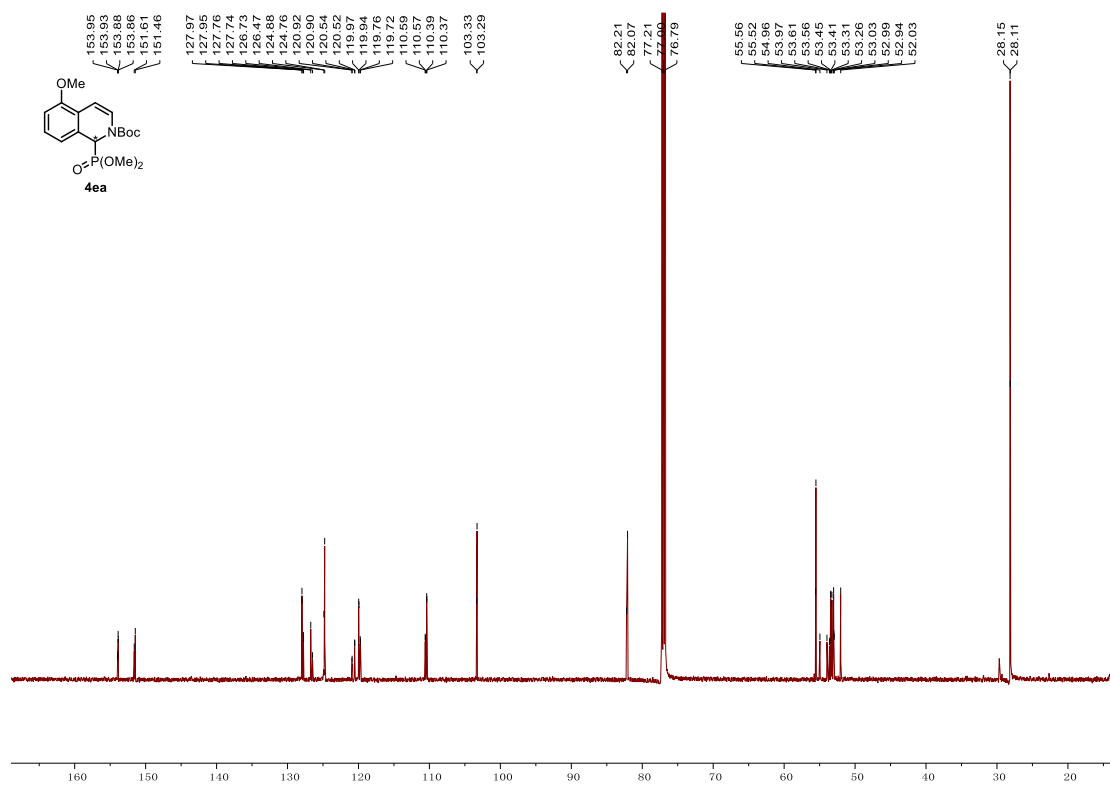

Fig.S 23  $^{13}\text{C}$  NMR of compound **4ea**

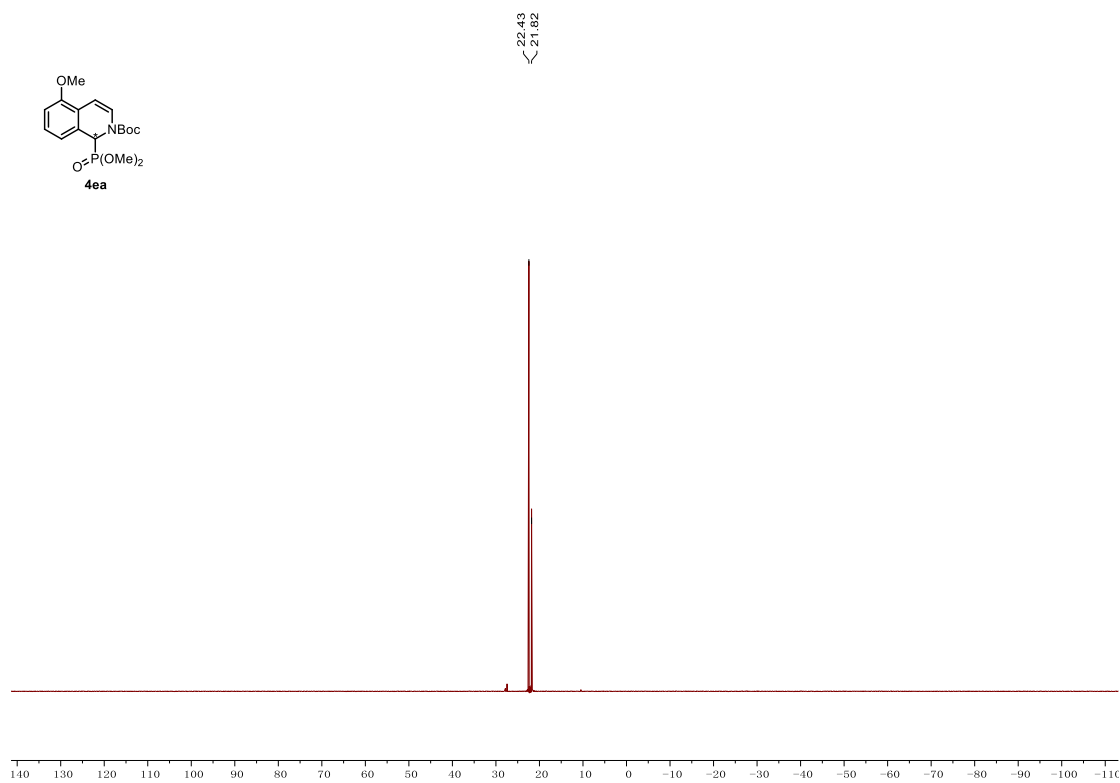

Fig.S 24  $^{31}\text{P}$  NMR of compound **4ea**

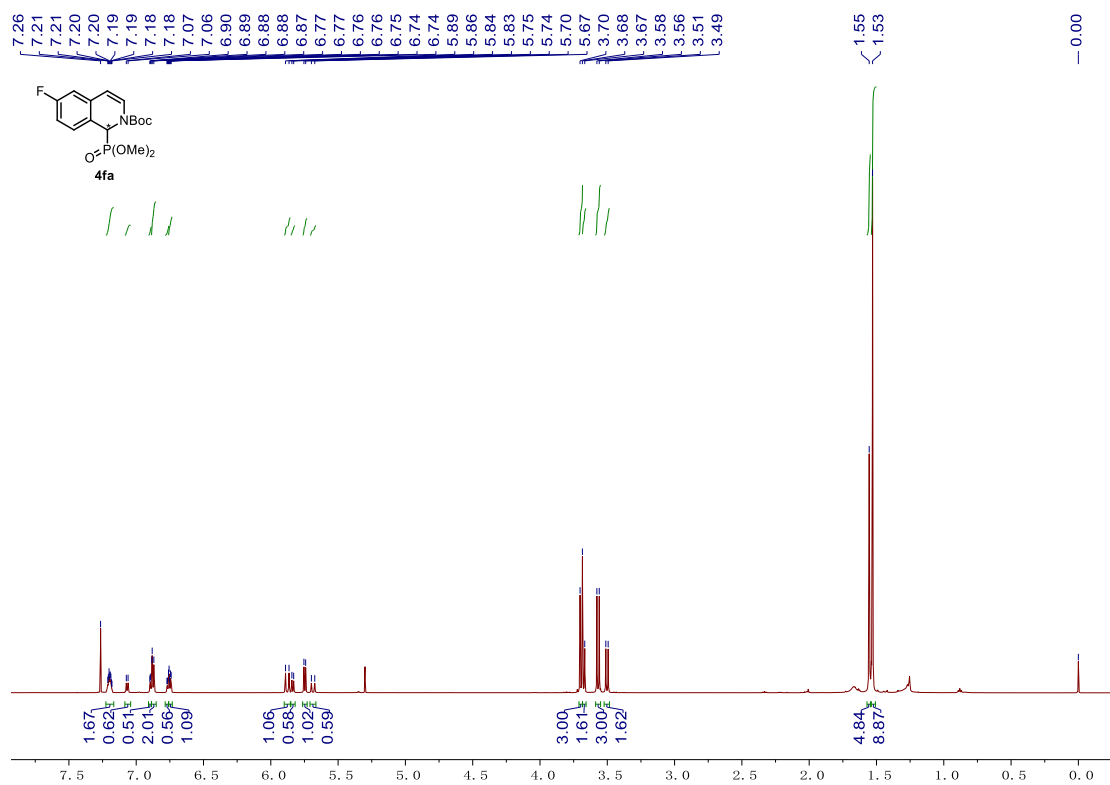

Fig.S 25  $^1\text{H}$  NMR of compound 4fa

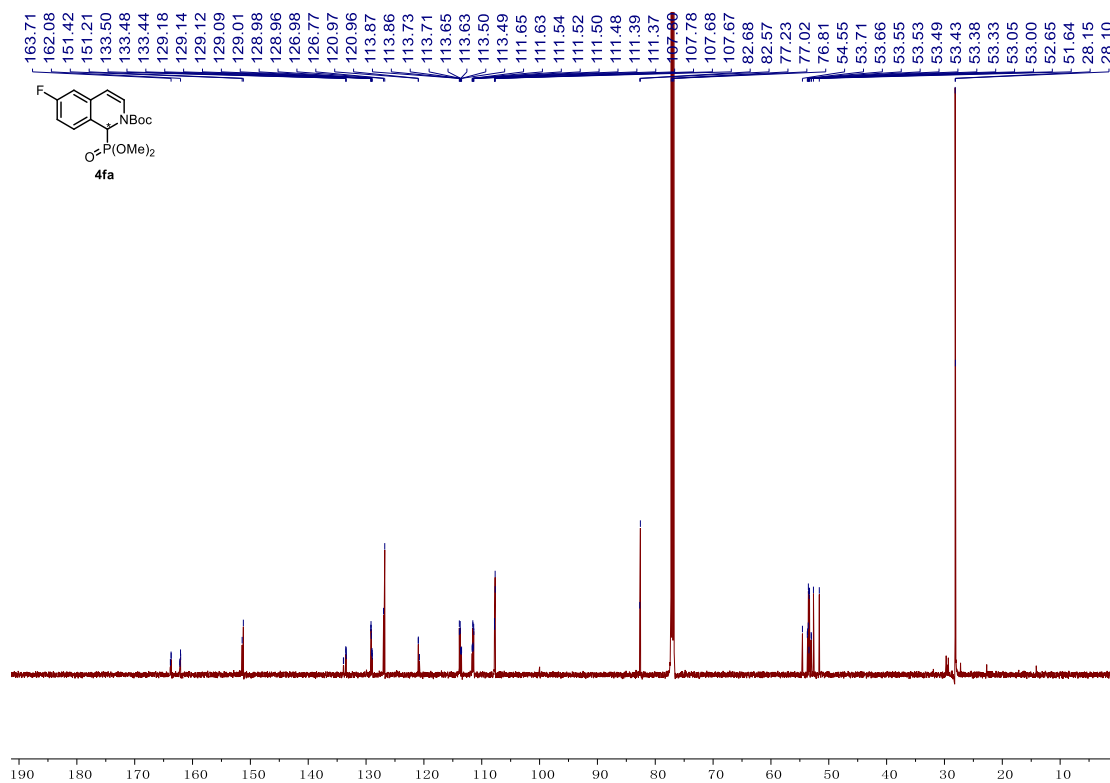

Fig.S 26  $^{13}\text{C}$  NMR of compound 4fa

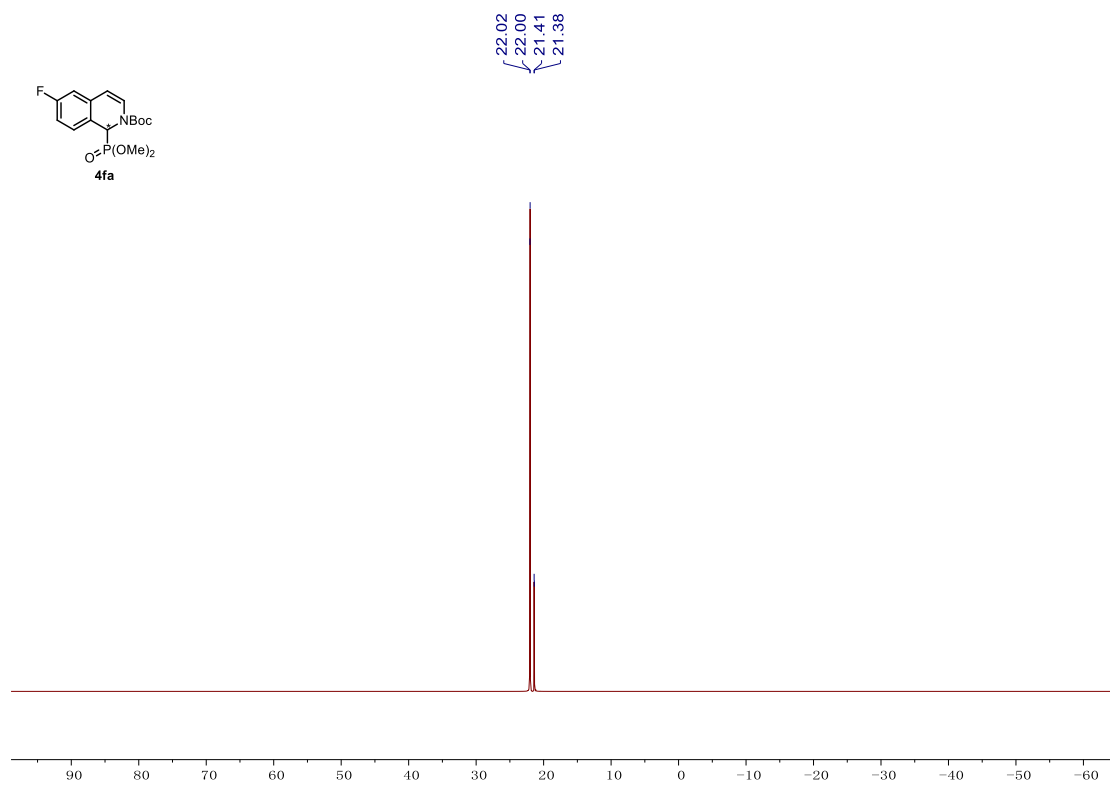

Fig.S 27  $^{31}\text{P}$  NMR of compound **4fa**

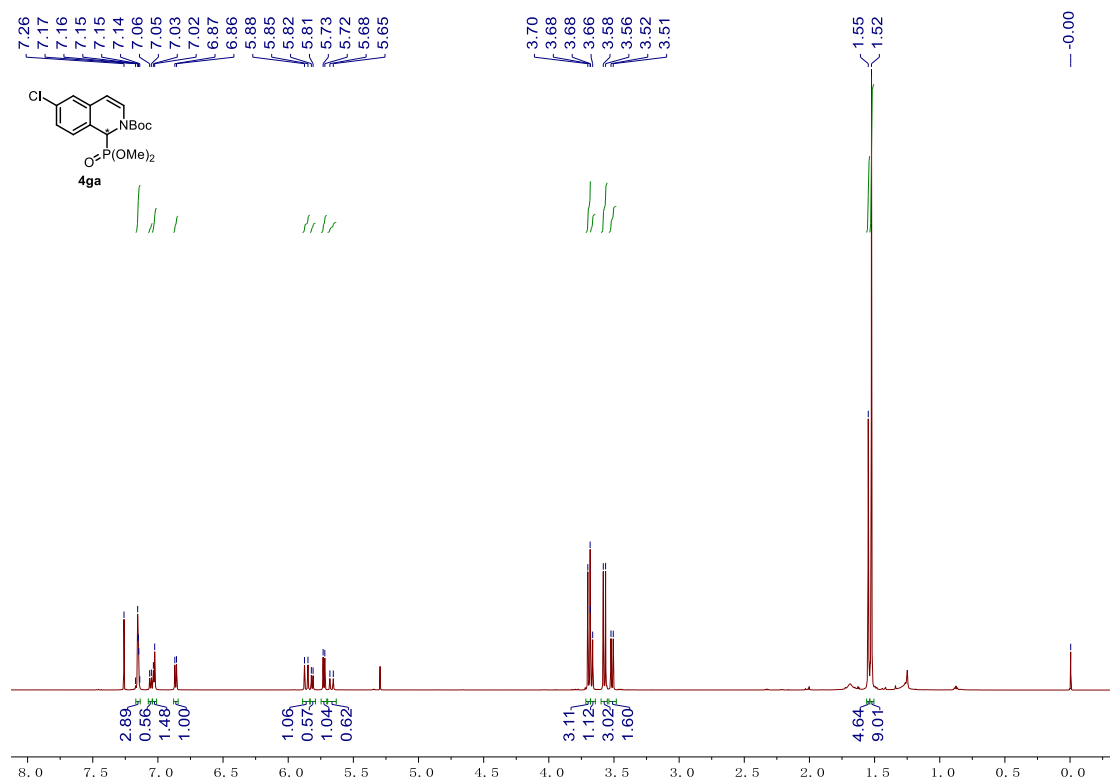

Fig.S 28  $^1\text{H}$  NMR of compound **4ga**

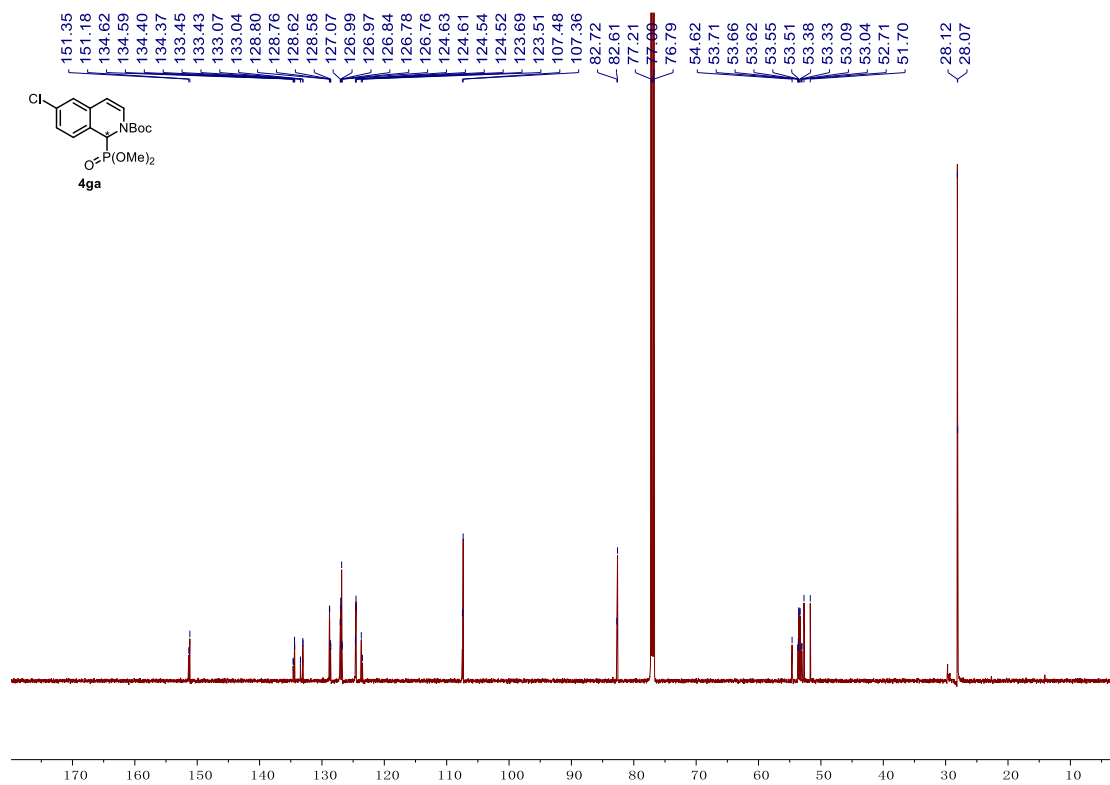

Fig.S 29  $^{13}\text{C}$  NMR of compound **4ga**

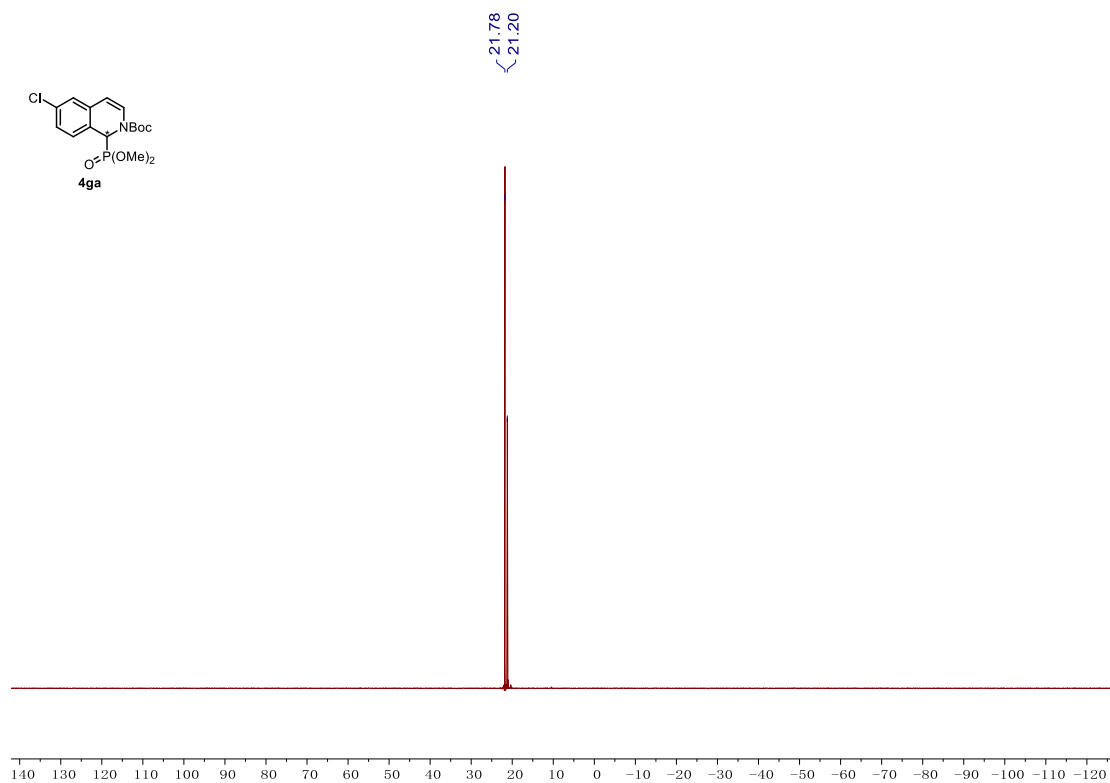

Fig.S 30  $^{31}\text{P}$  NMR of compound **4ga**

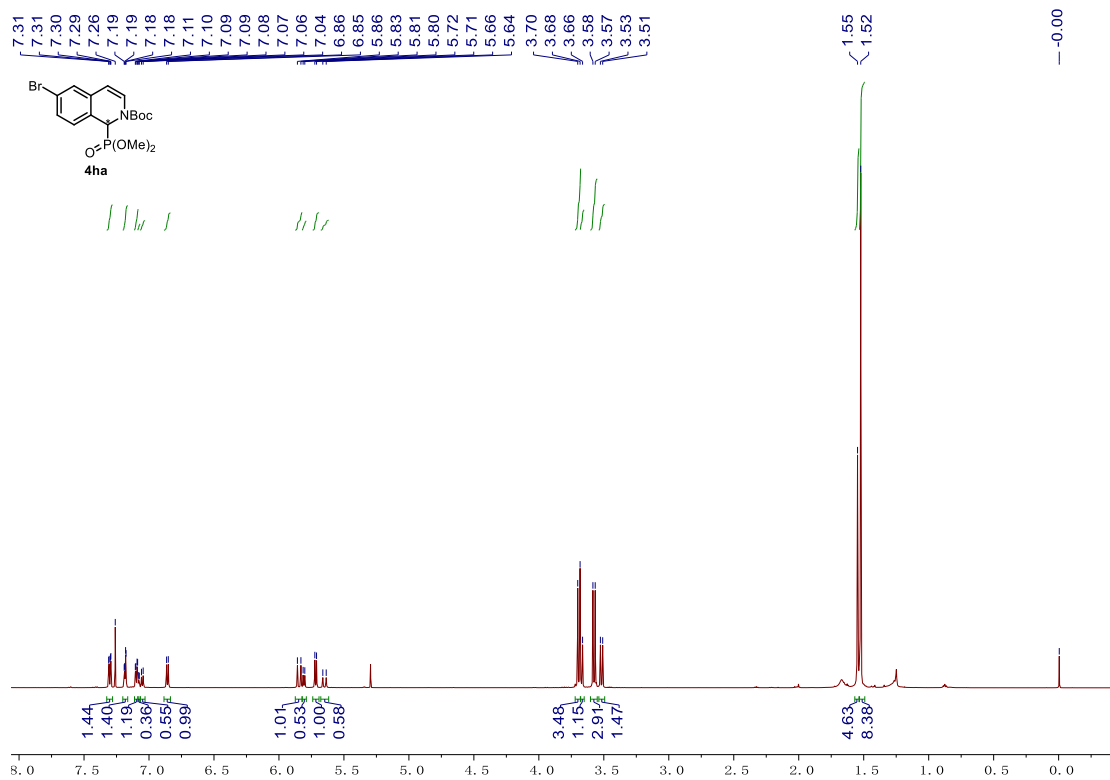

Fig.S 31 <sup>1</sup>H NMR of compound 4ha

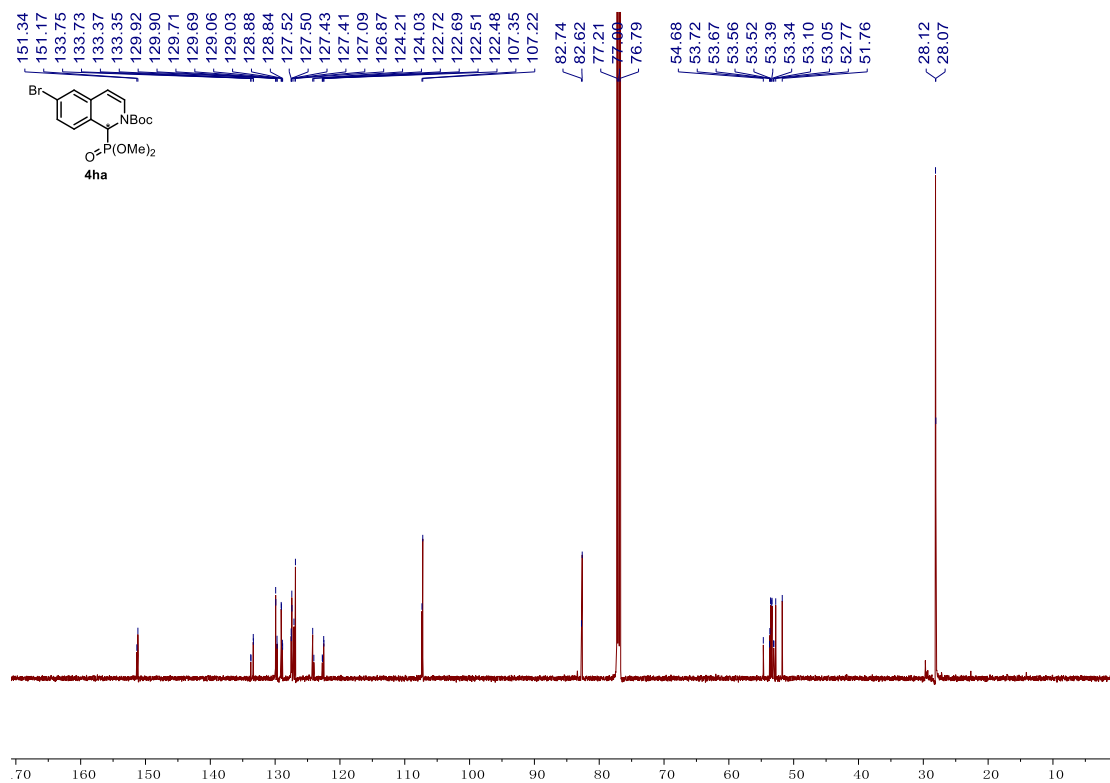

Fig.S 32 <sup>13</sup>C NMR of compound 4ha

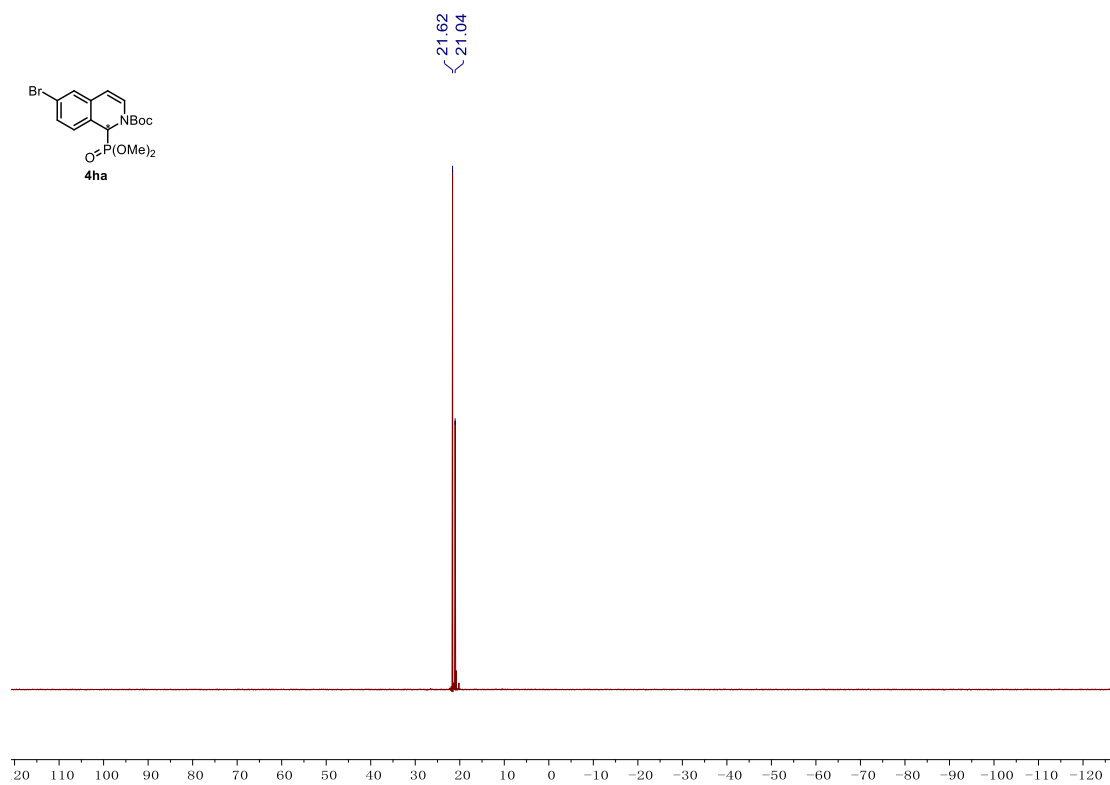

Fig.S 33  $^{31}\text{P}$  NMR of compound **4ha**

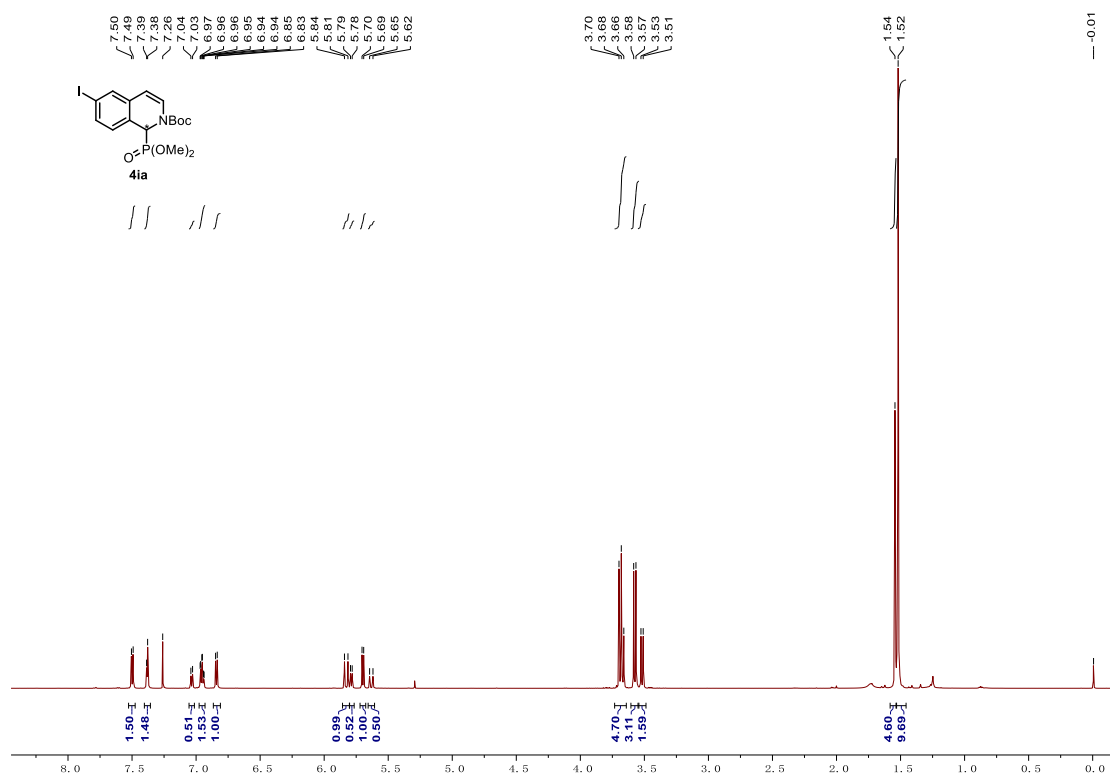

Fig.S 34  $^1\text{H}$  NMR of compound **4ia**

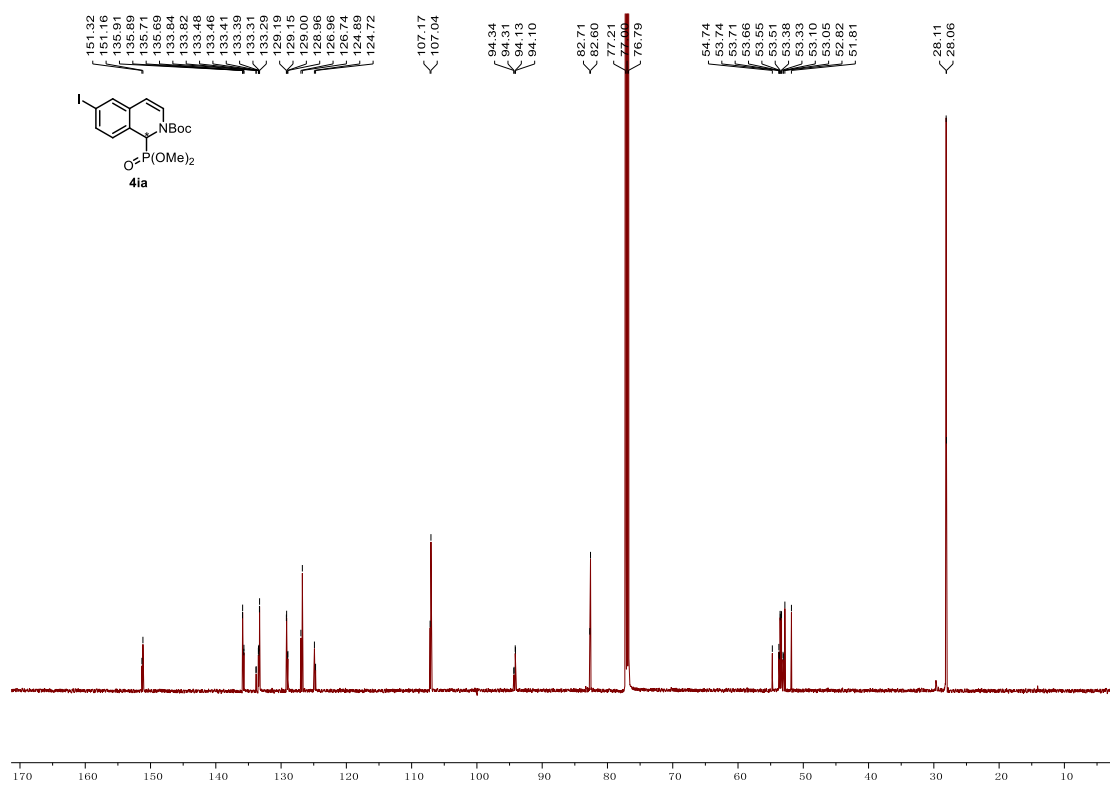

Fig.S 35 <sup>13</sup>C NMR of compound **4ia**

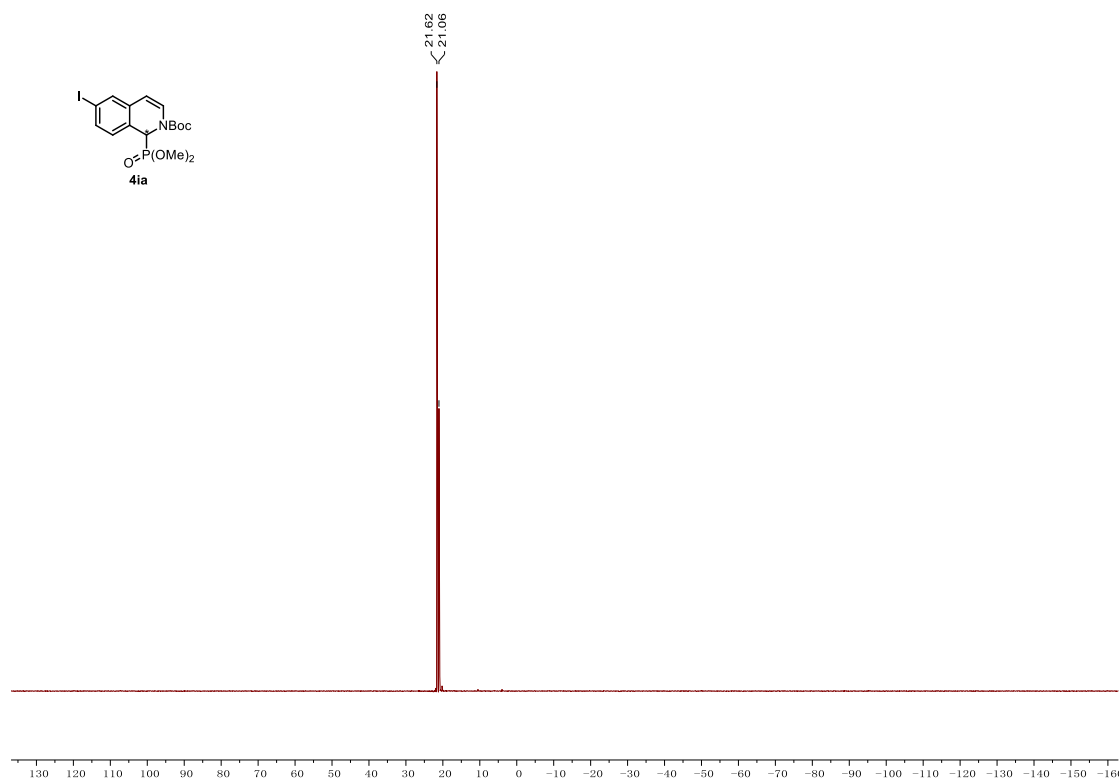

Fig.S 36 <sup>31</sup>P NMR of compound **4ia**

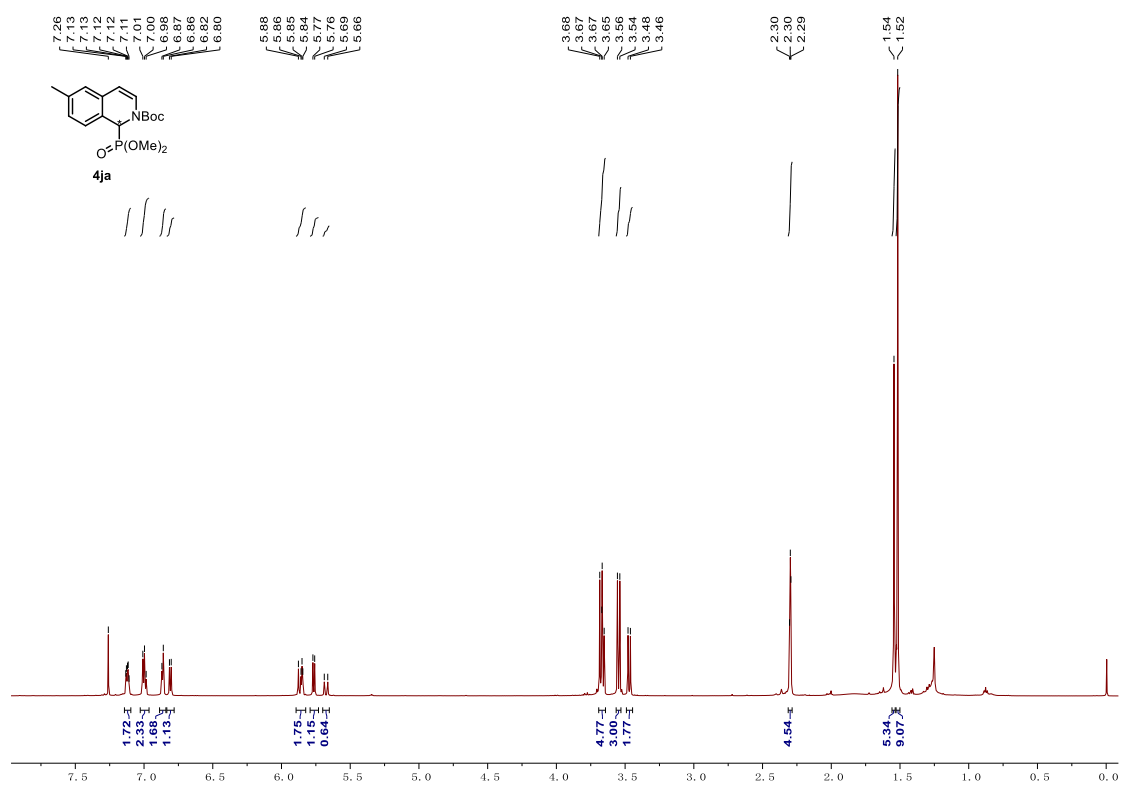

Fig.S 37 <sup>1</sup>H NMR of compound **4ja**

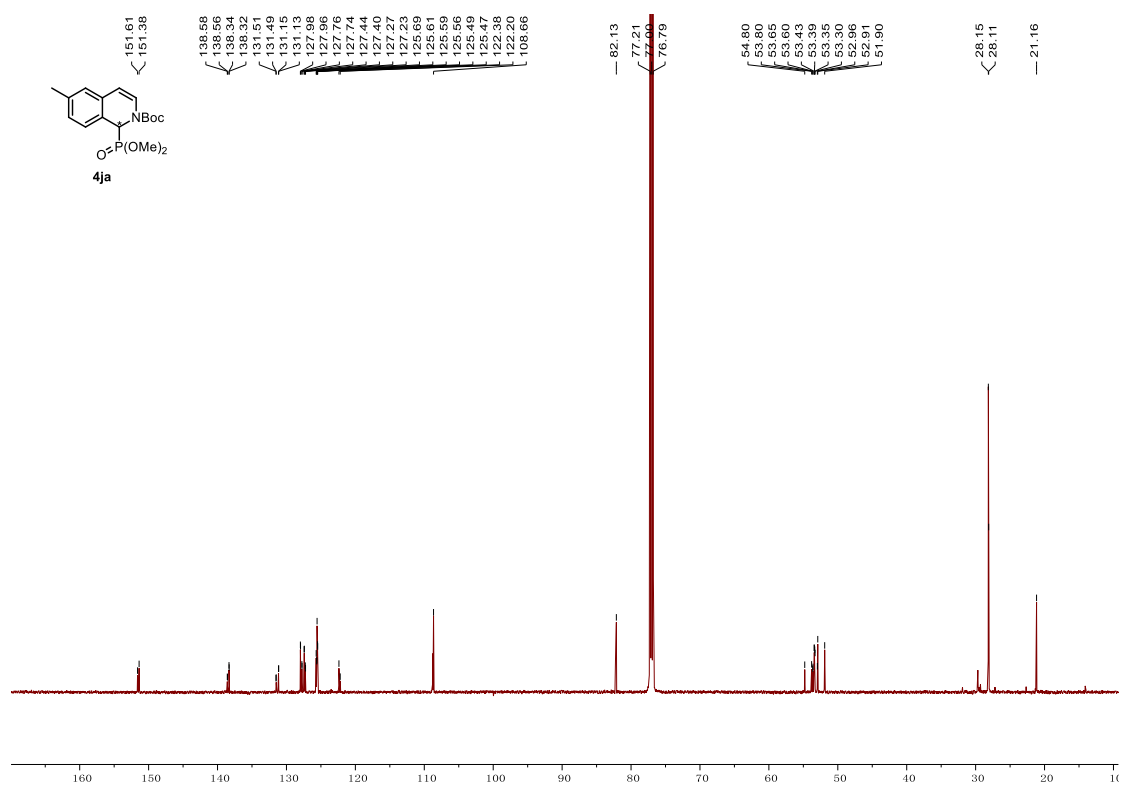

Fig.S 38 <sup>13</sup>C NMR of compound **4ja**



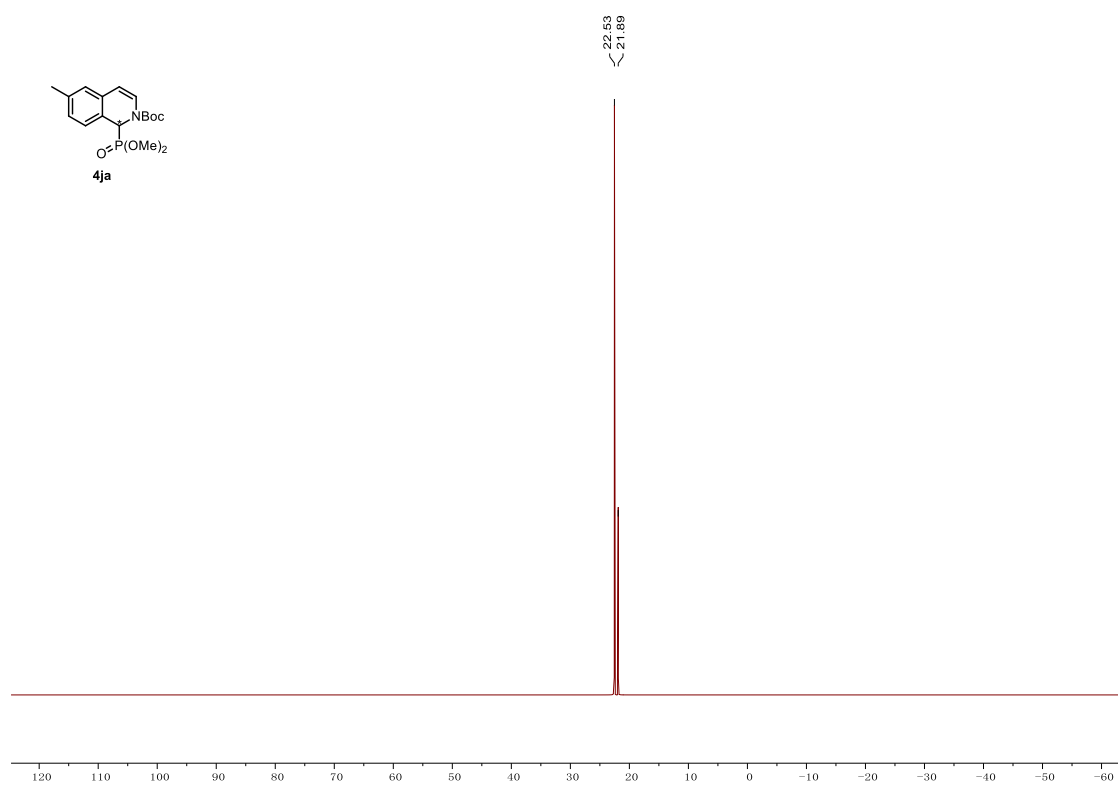

Fig.S 39  $^{31}\text{P}$  NMR of compound **4ja**

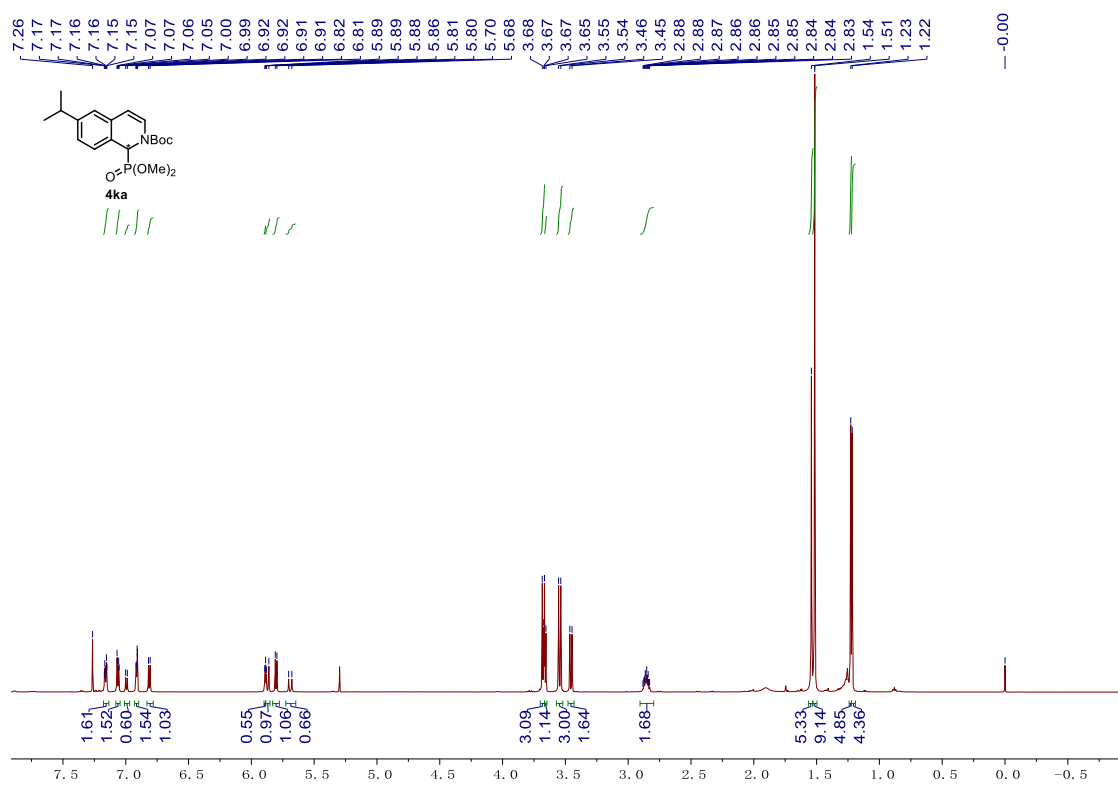

Fig.S 40  $^1\text{H}$  NMR of compound **4ka**

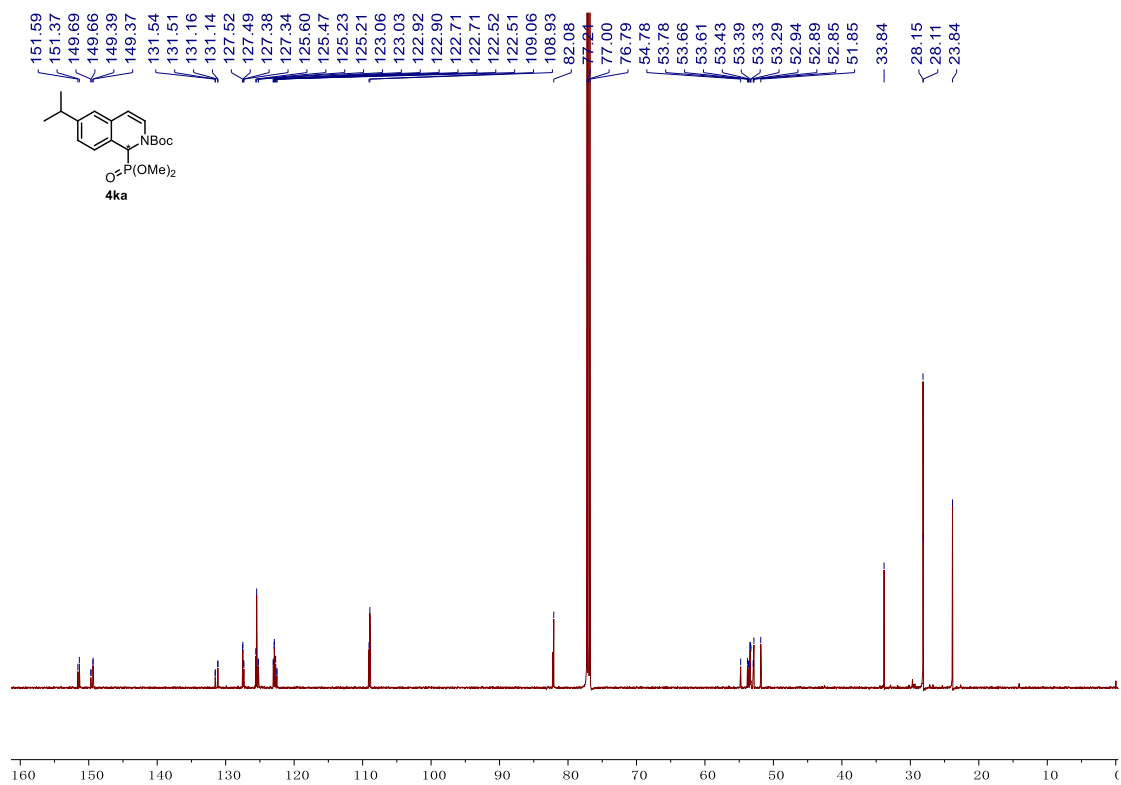

Fig.S 41 <sup>13</sup>C NMR of compound **4ka**

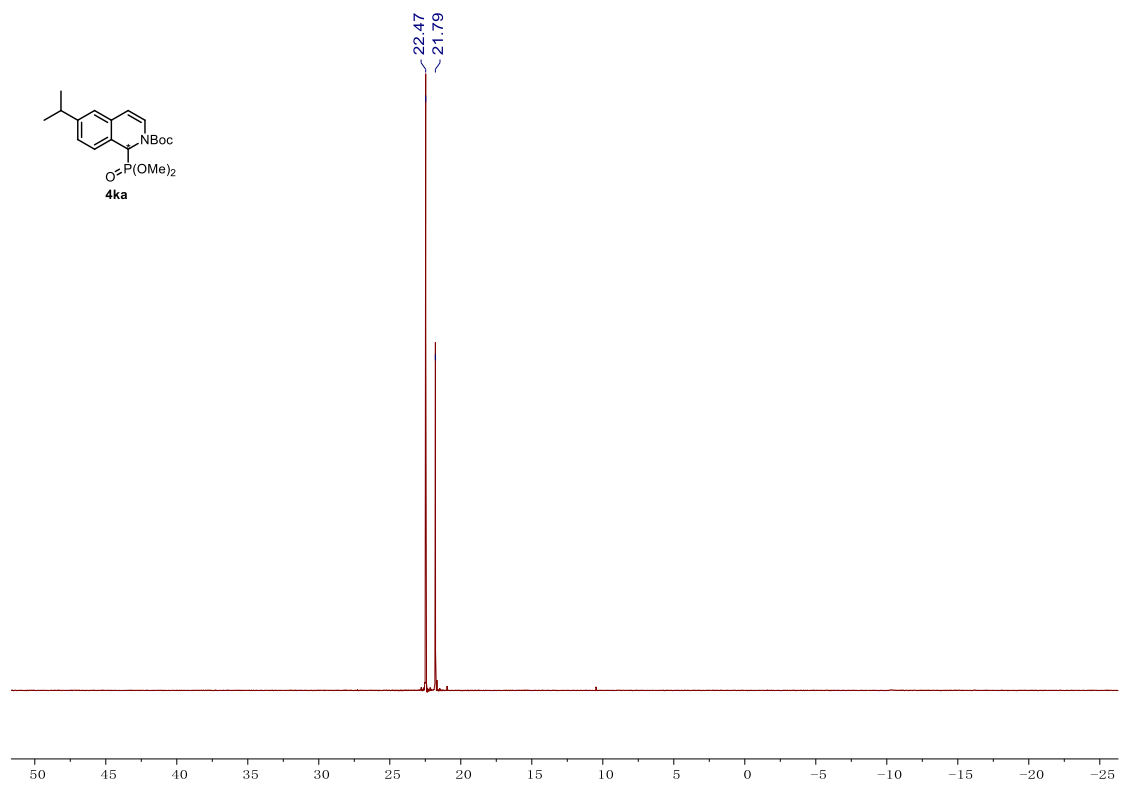

Fig.S 42 <sup>31</sup>P NMR of compound **4ka**

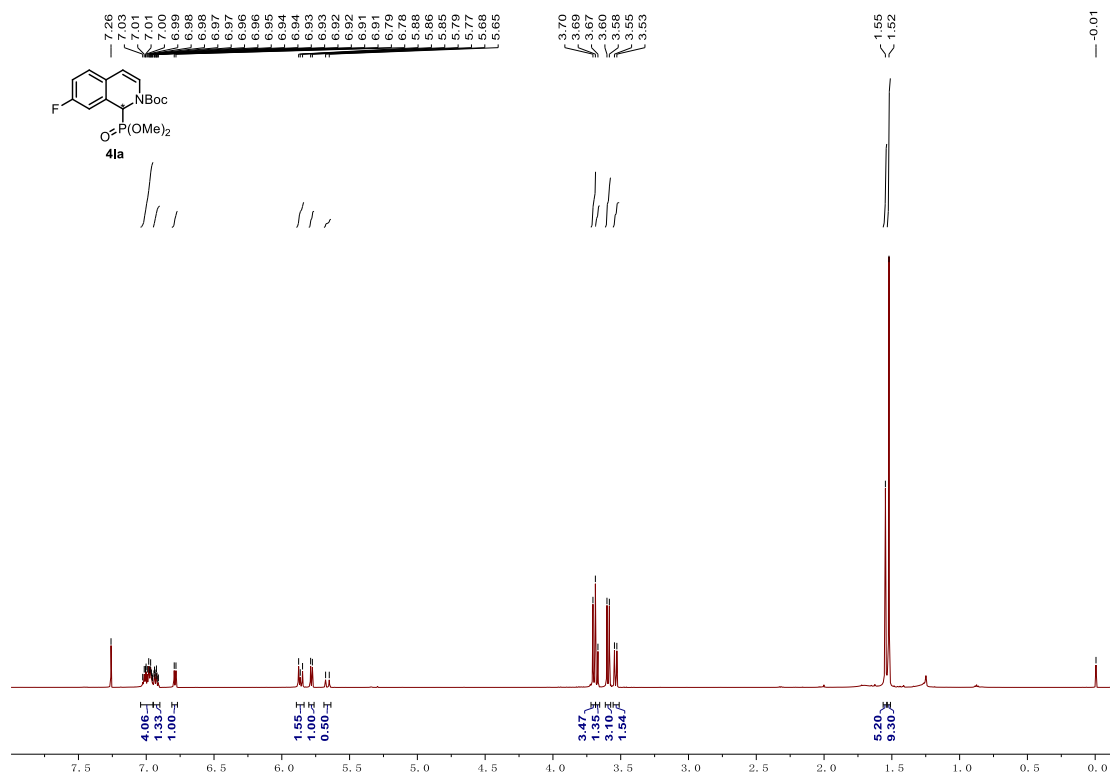

Fig.S 43 <sup>1</sup>H NMR of compound 4a

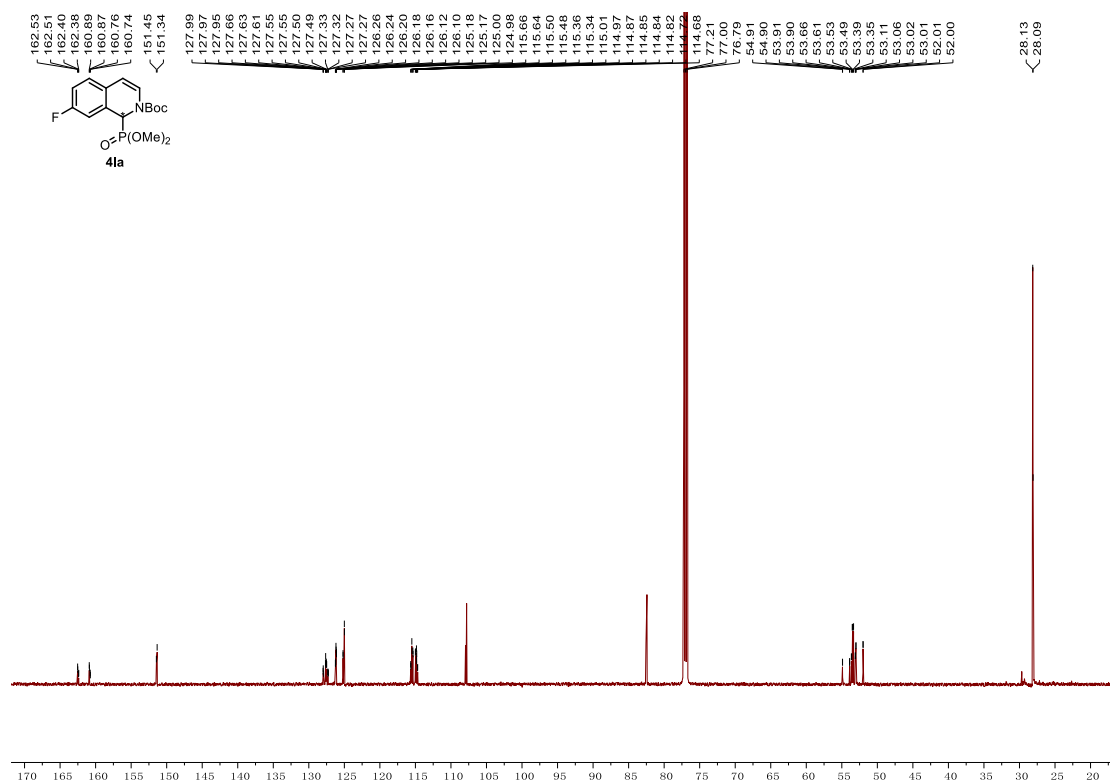

Fig.S 44 <sup>13</sup>C NMR of compound 4a

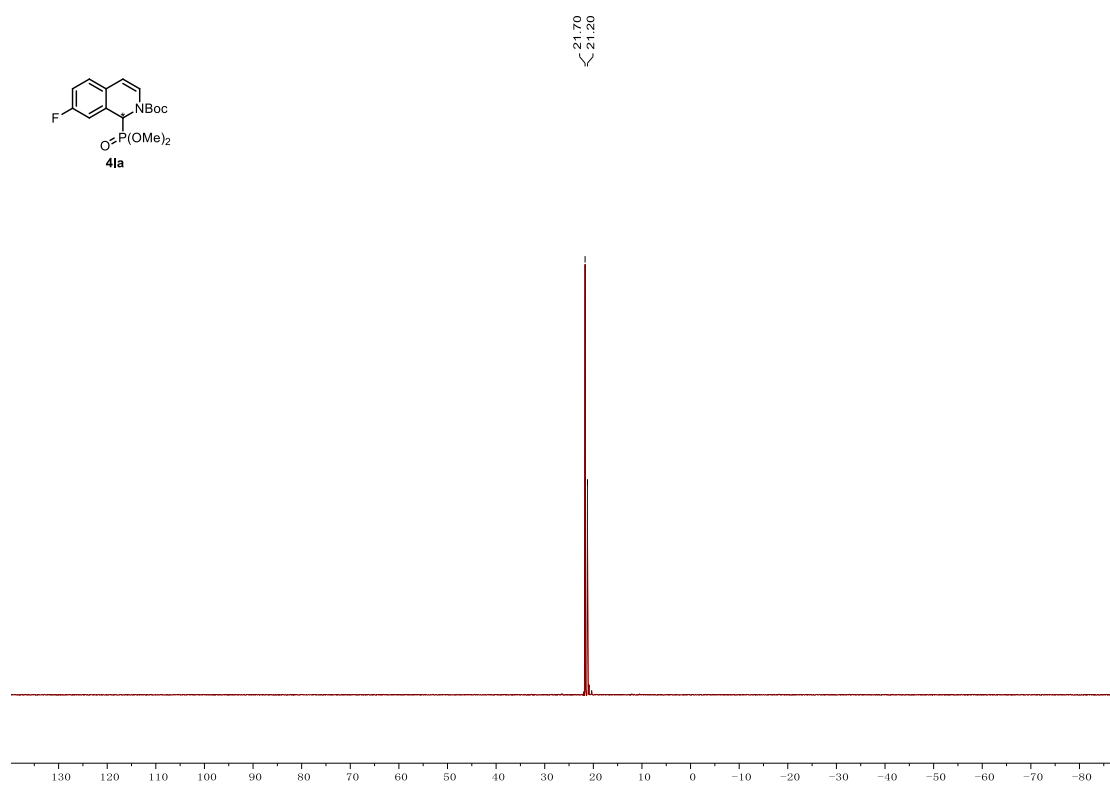

Fig.S 45  $^{31}\text{P}$  NMR of compound **4la**

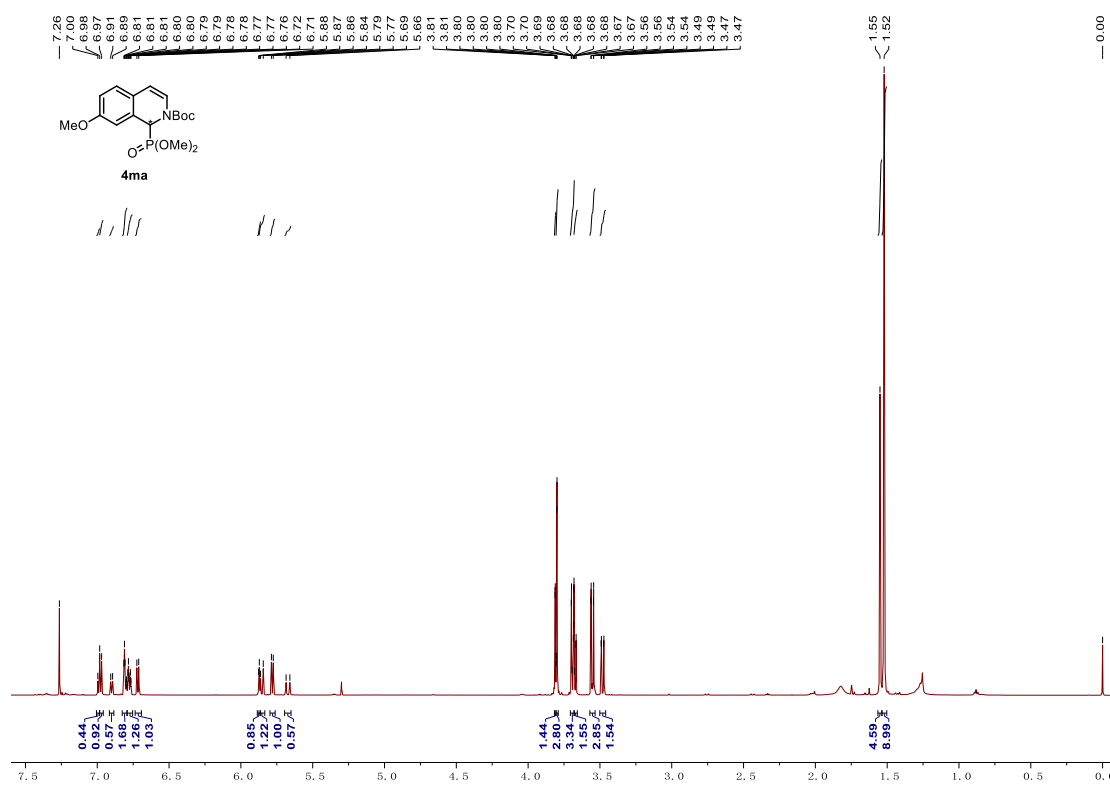

Fig.S 46  $^1\text{H}$  NMR of compound **4ma**

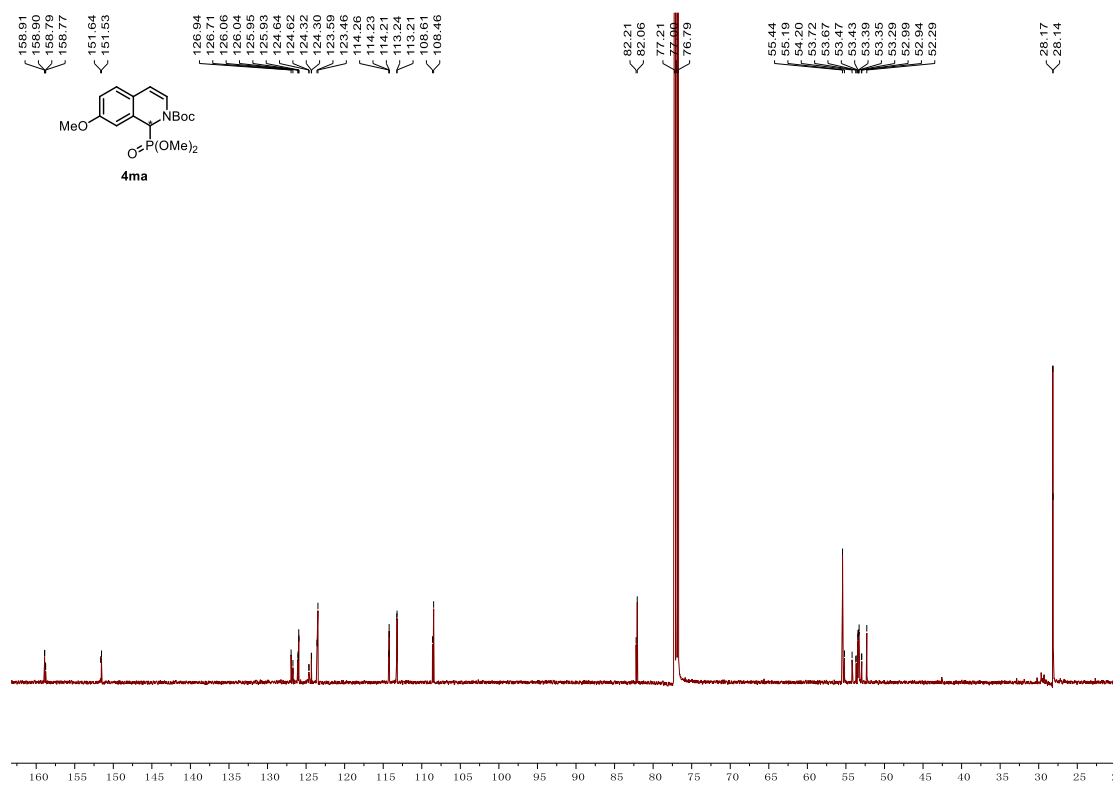

Fig.S 47 <sup>13</sup>C NMR of compound 4ma

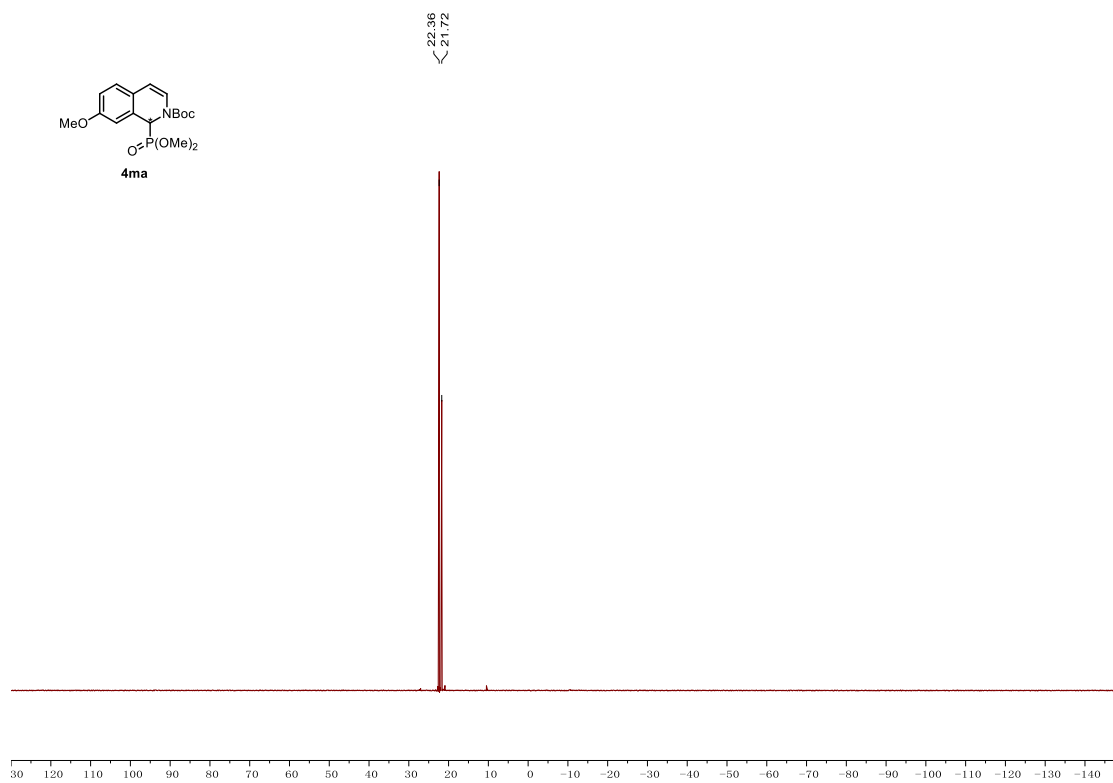

Fig.S 48 <sup>31</sup>P NMR of compound 4ma

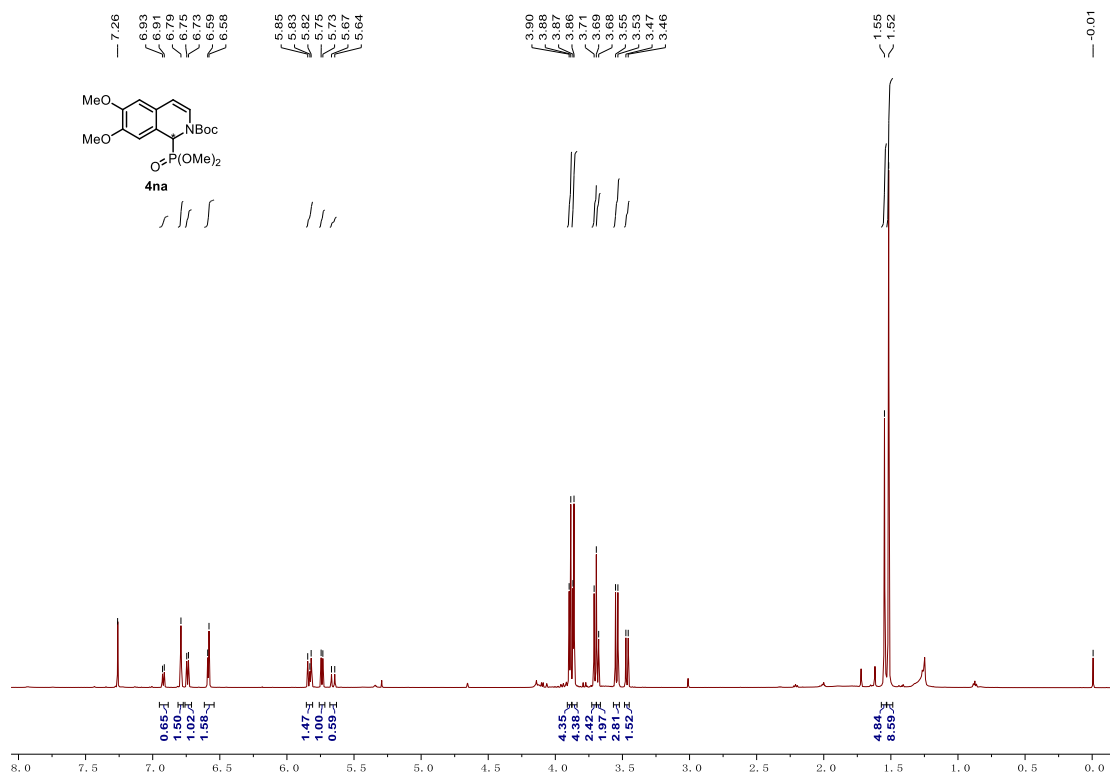

Fig.S 49 <sup>1</sup>H NMR of compound 4na

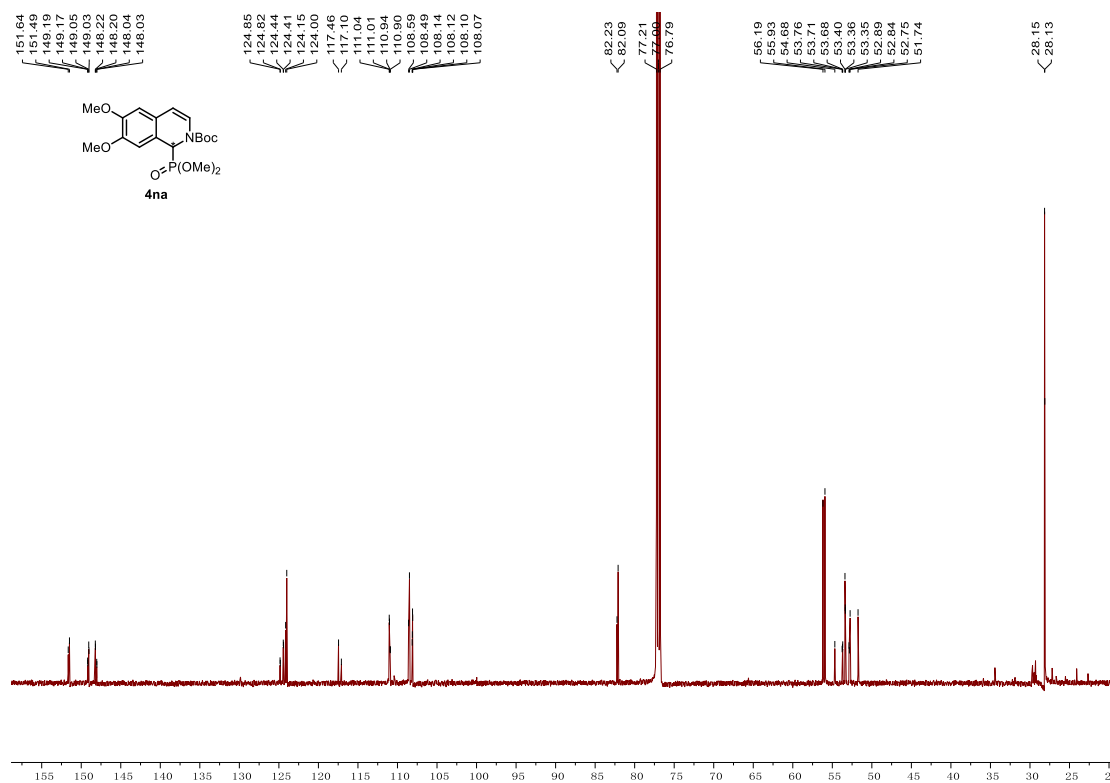

Fig.S 50 <sup>13</sup>C NMR of compound 4na

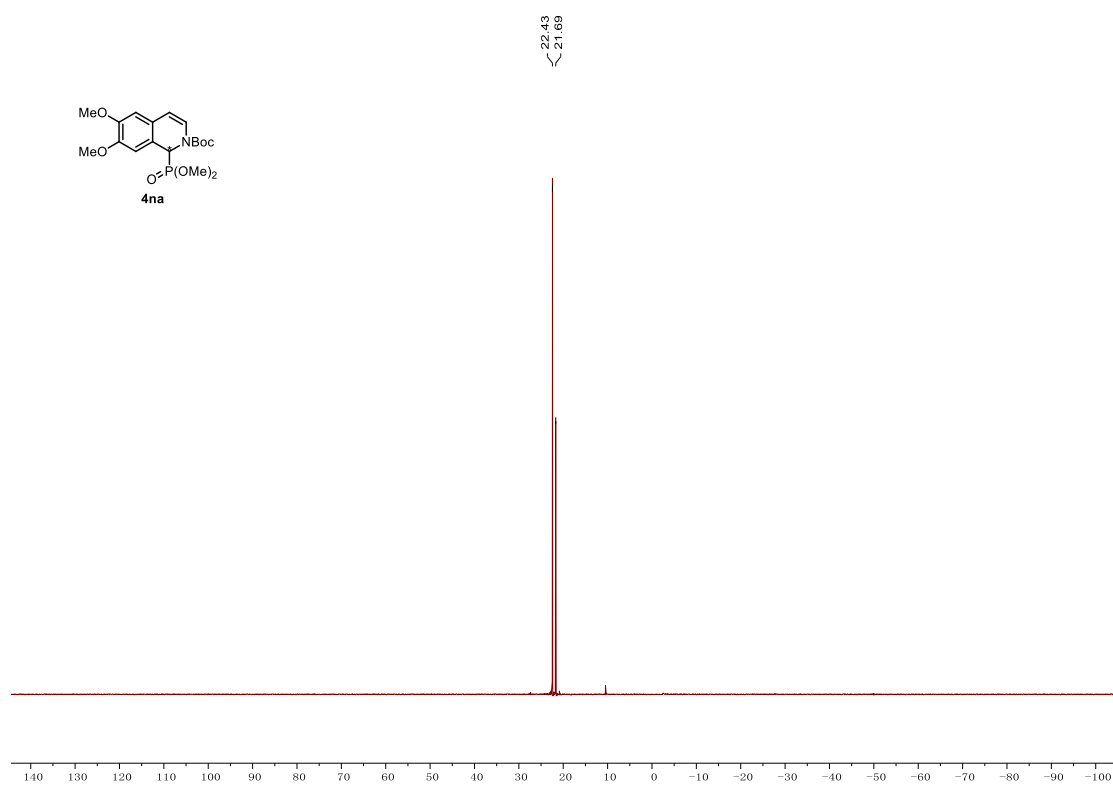

Fig.S 51 <sup>31</sup>P NMR of compound **4na**

### 3. NMR spectrum of 1,2-dihydroisoquinoline-1-ylphenylphosphine oxides 6

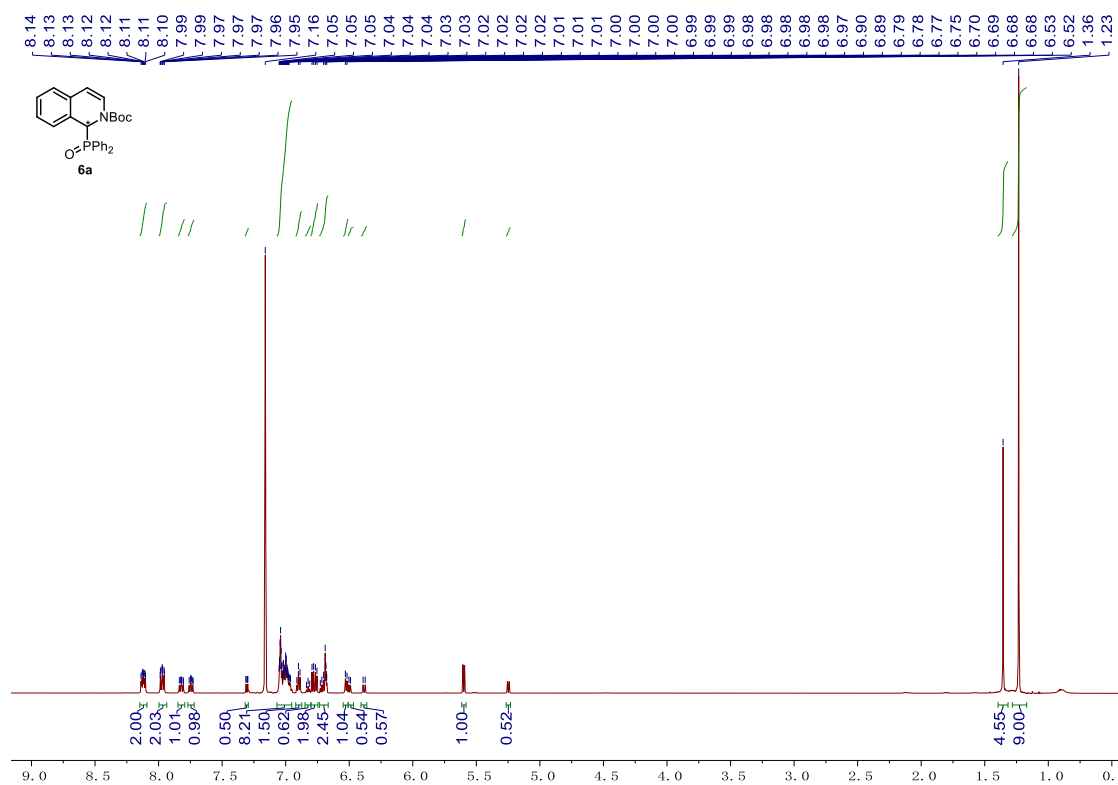

Fig.S 52 <sup>1</sup>H NMR of compound 6a

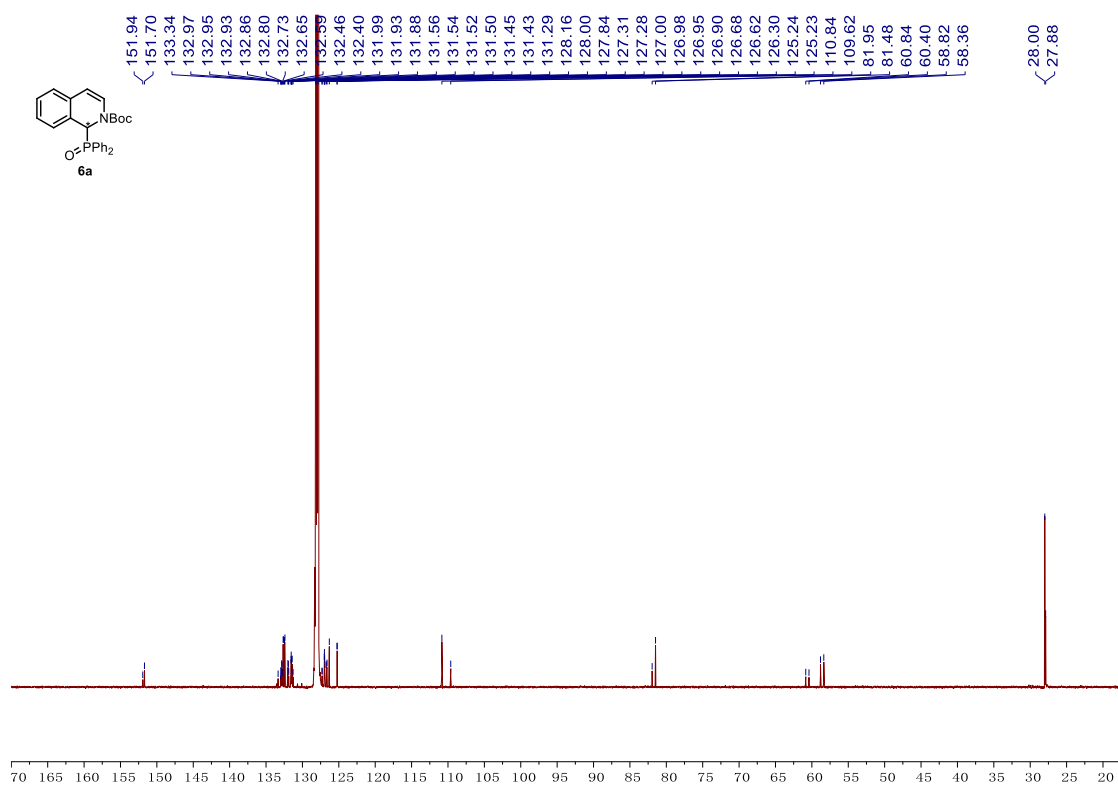

Fig.S 53 <sup>13</sup>C NMR of compound 6a



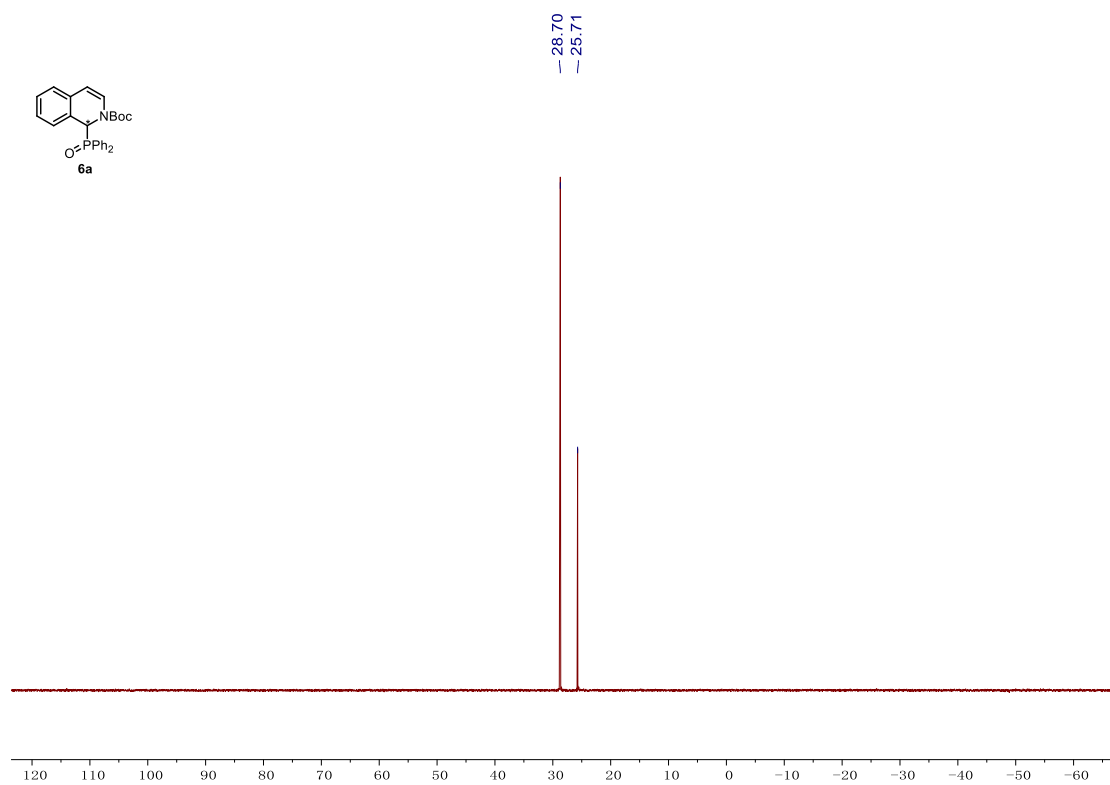

Fig.S 54  $^{31}\text{P}$  NMR of compound **6a**

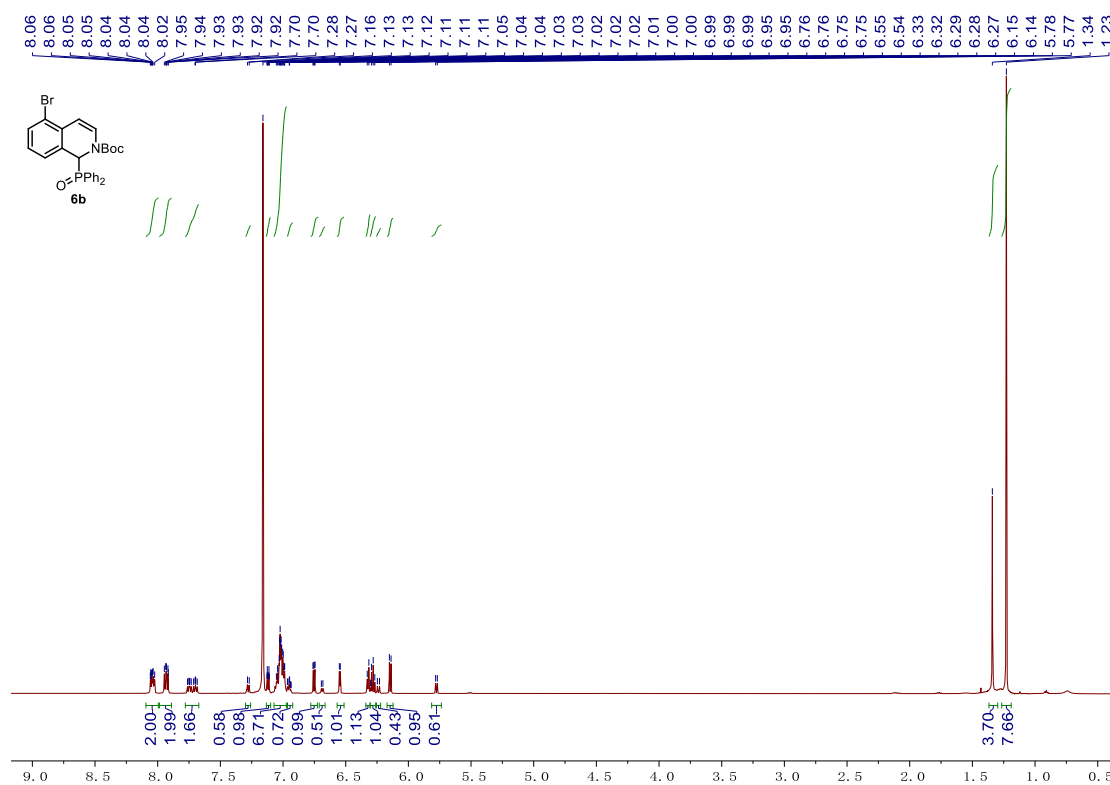

Fig.S 55  $^1\text{H}$  NMR of compound **6b**

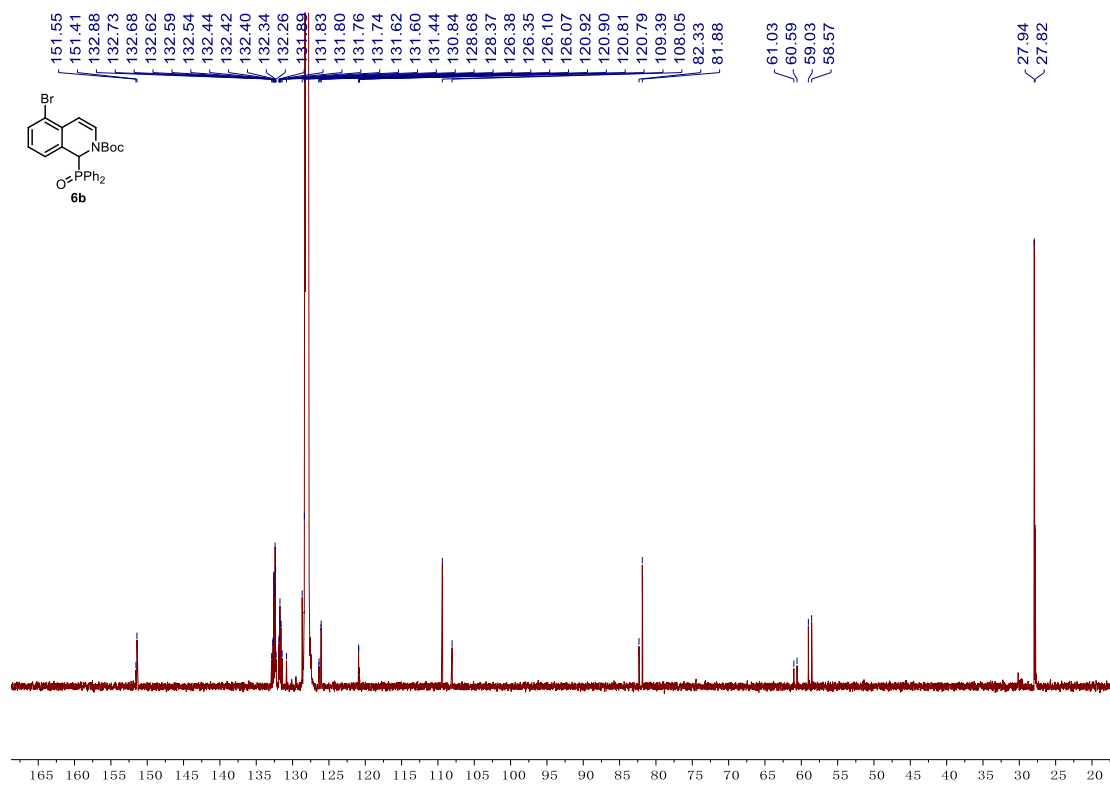

Fig.S 56  $^{13}\text{C}$  NMR of compound **6b**

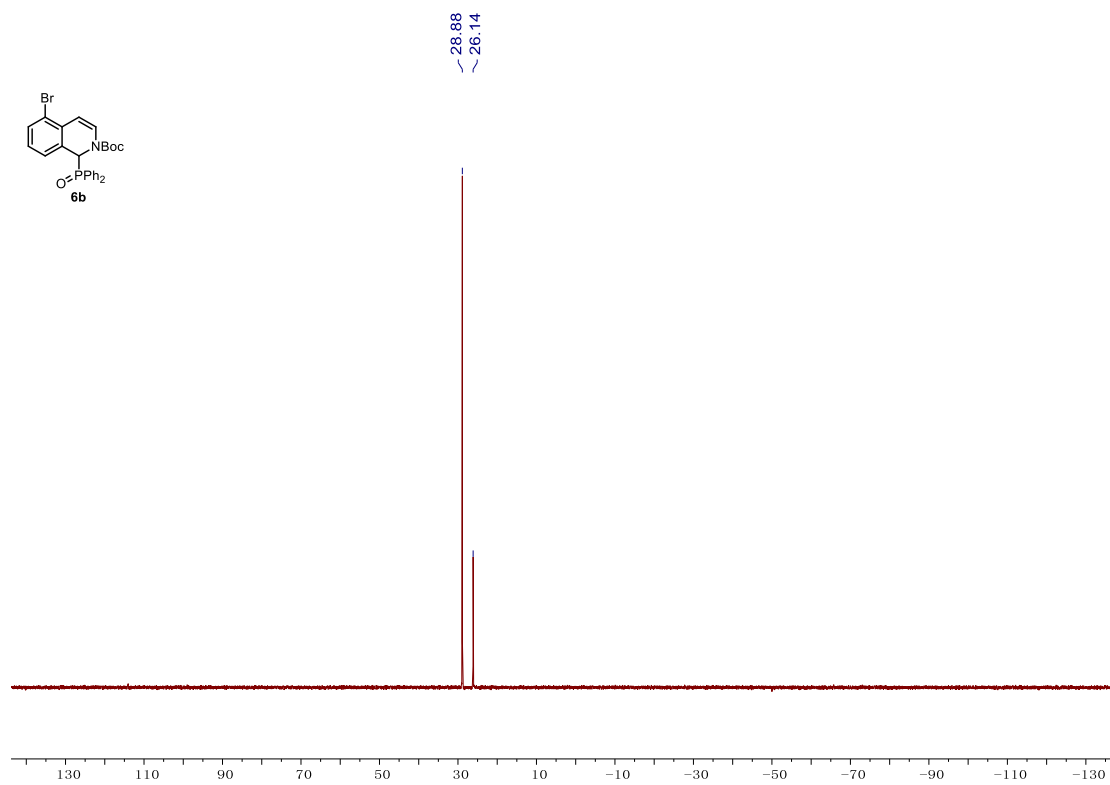

Fig.S 57  $^{31}\text{P}$  NMR of compound **6b**



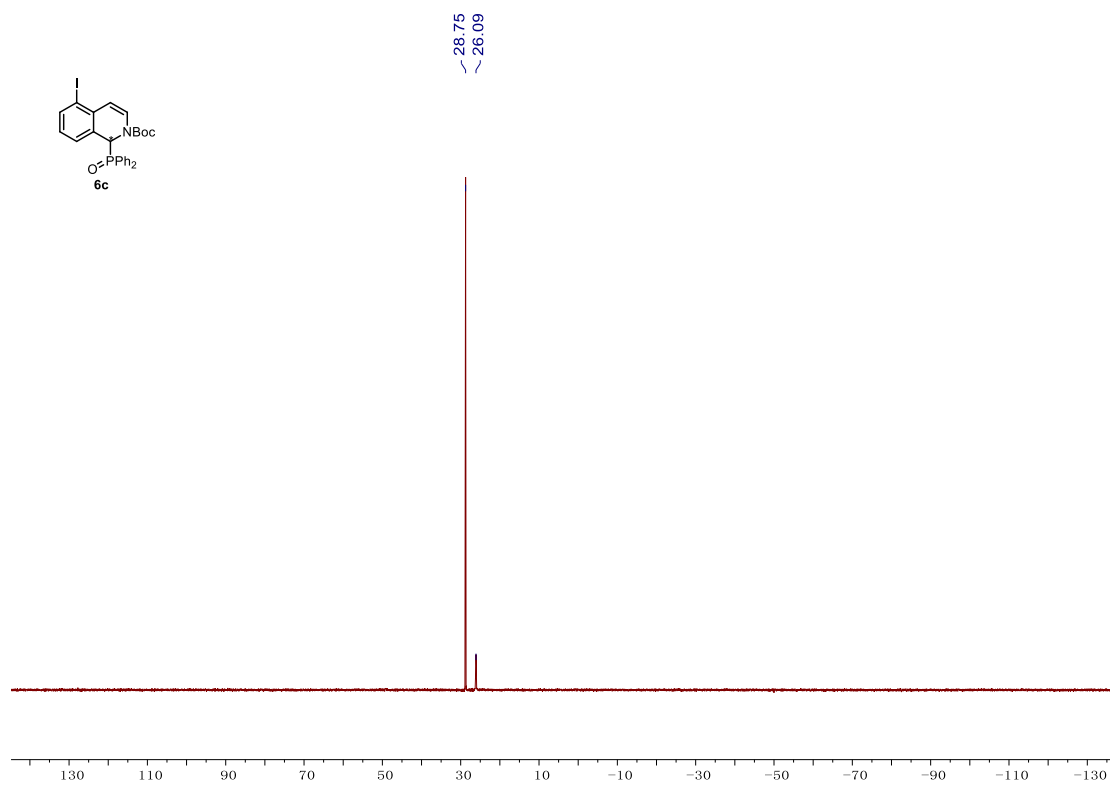

Fig.S 60  $^{31}\text{P}$  NMR of compound **6c**

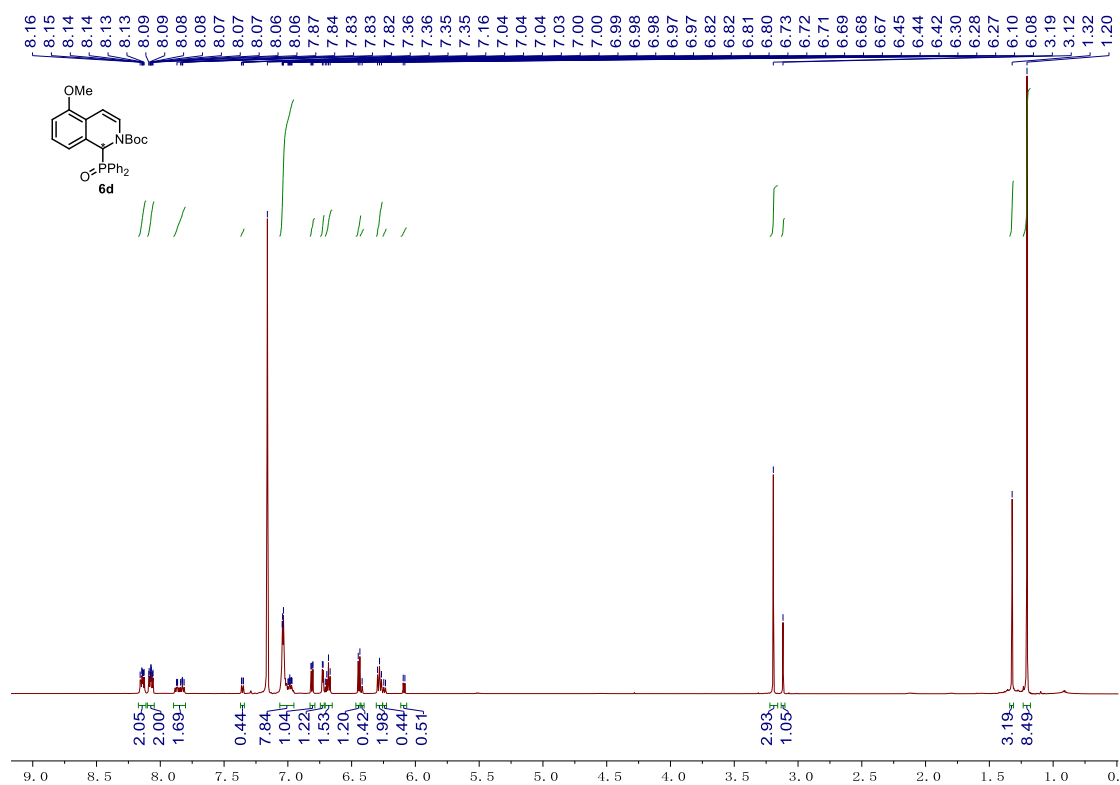

Fig.S 61  $^1\text{H}$  NMR of compound **6d**

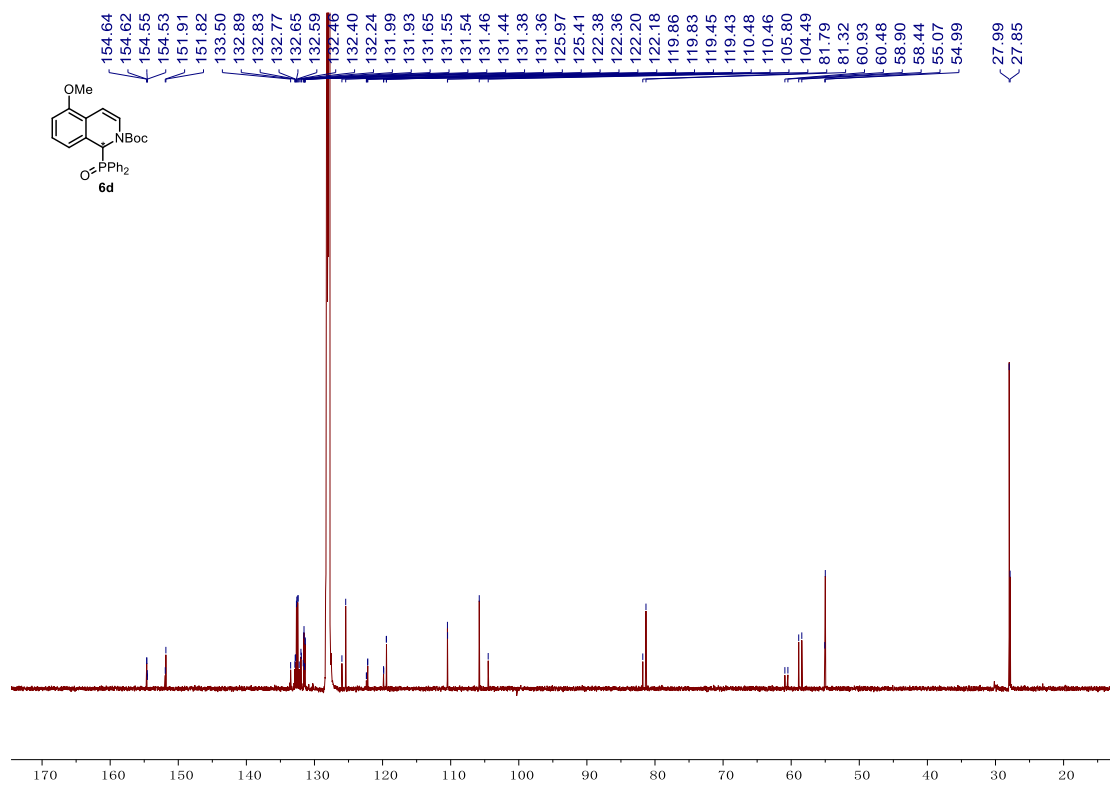

Fig.S 62 <sup>13</sup>C NMR of compound **6d**

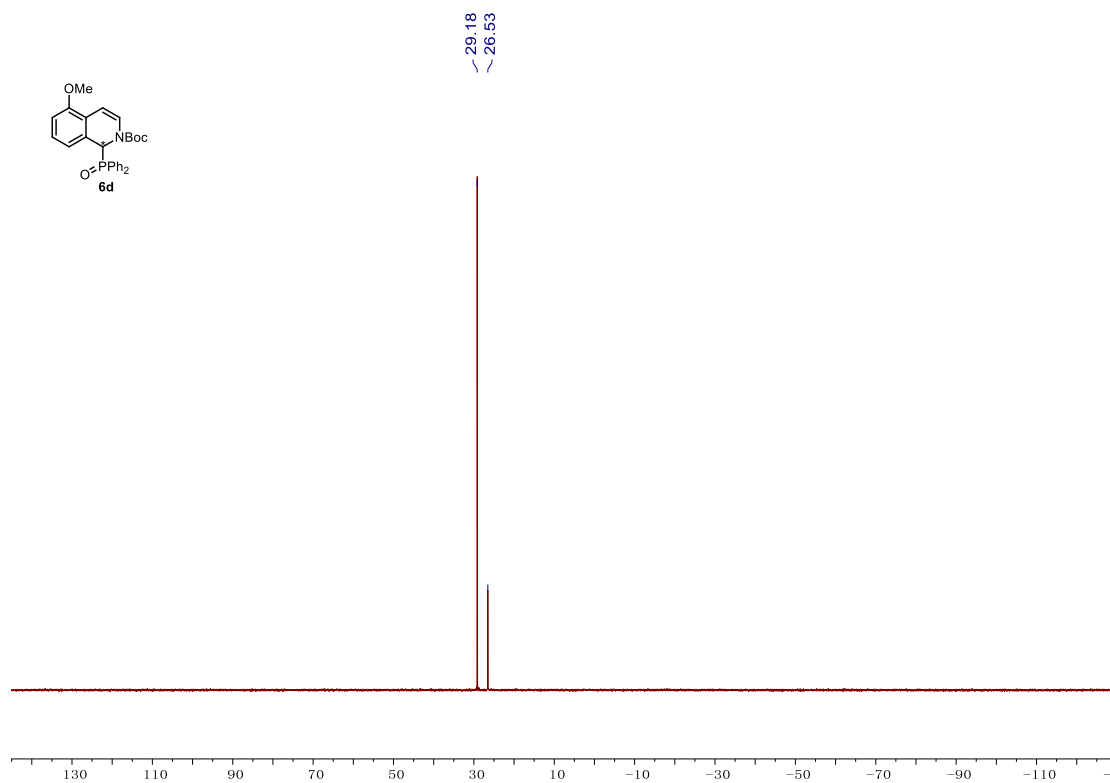

Fig.S 63 <sup>31</sup>P NMR of compound **6d**

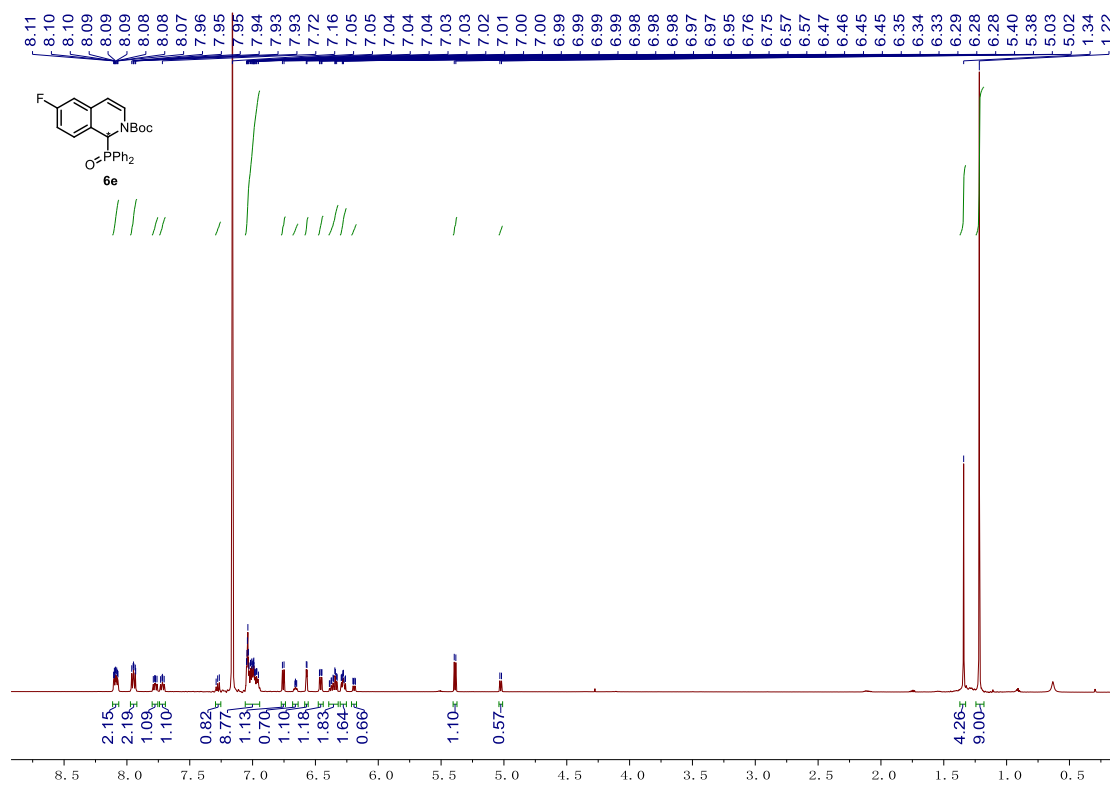

Fig.S 64  $^1\text{H}$  NMR of compound **6e**

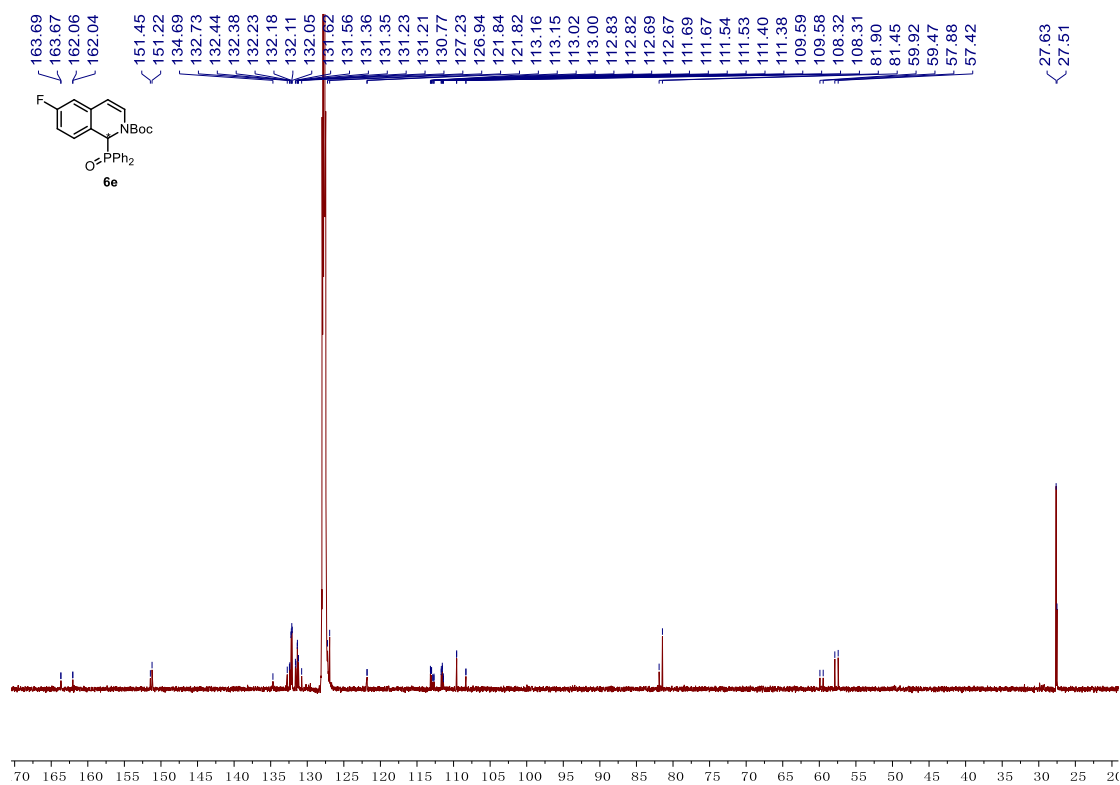

Fig.S 65  $^{13}\text{C}$  NMR of compound **6e**

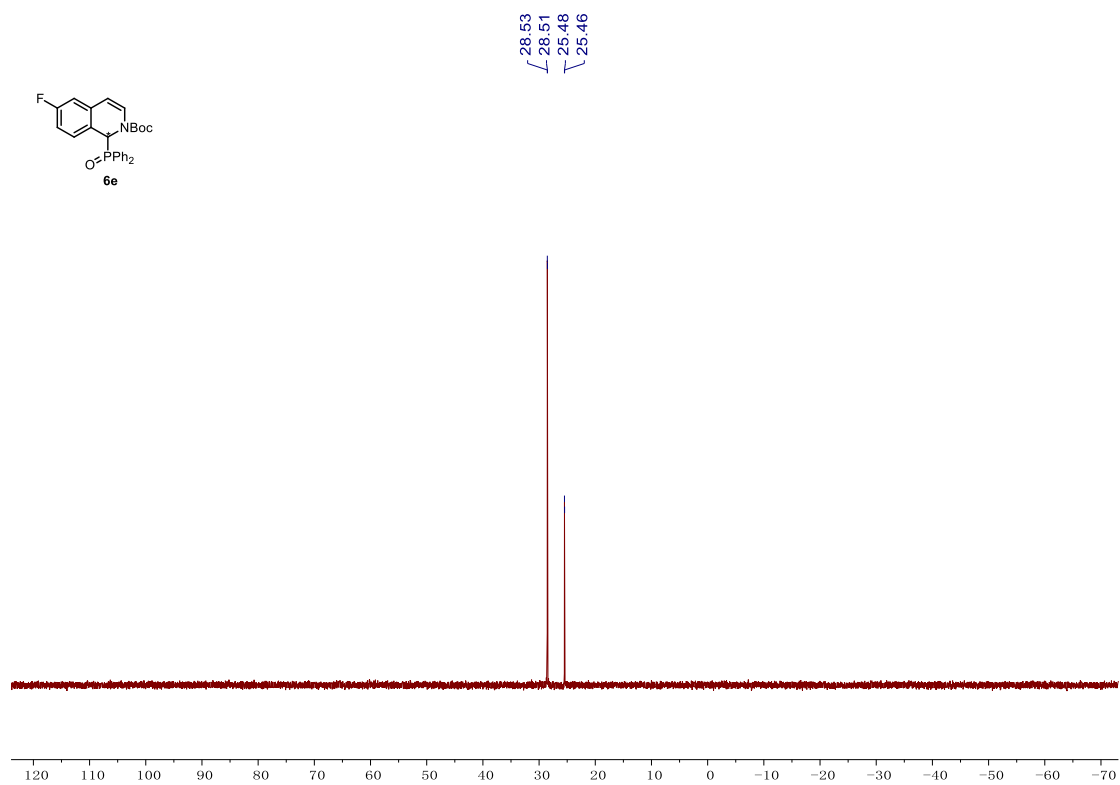

Fig.S 66  $^{31}\text{P}$  NMR of compound **6e**

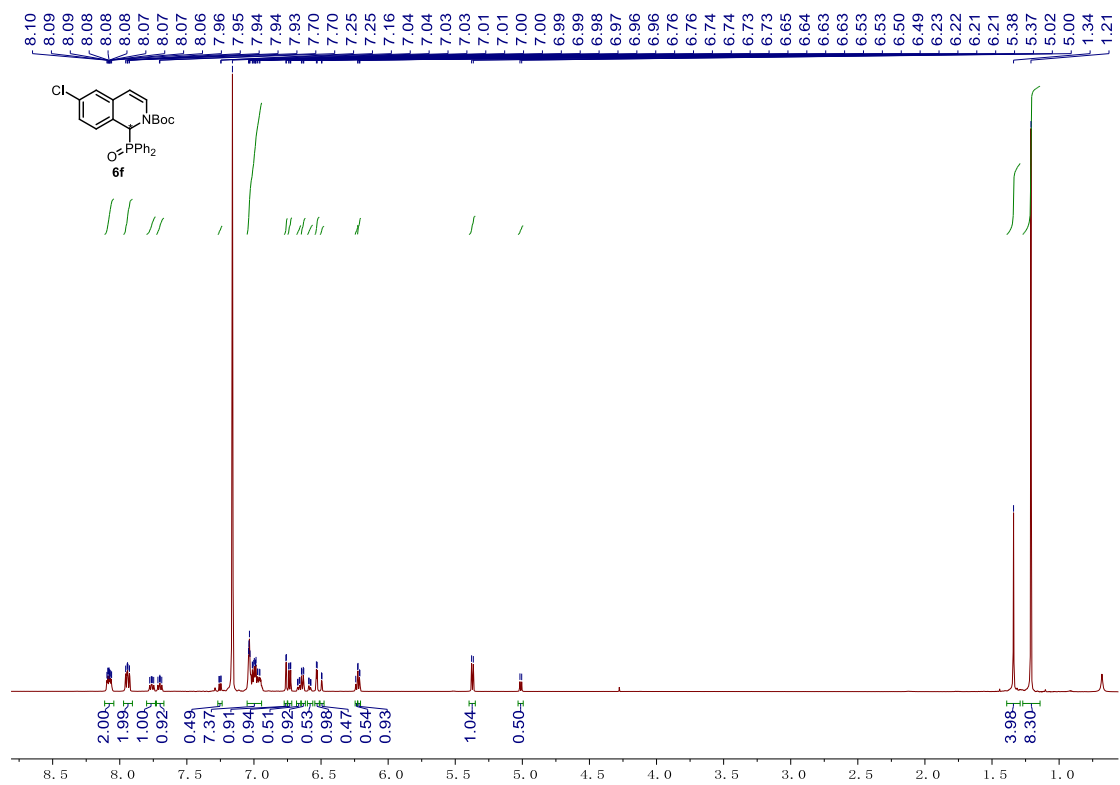

Fig.S 67  $^1\text{H}$  NMR of compound **6f**

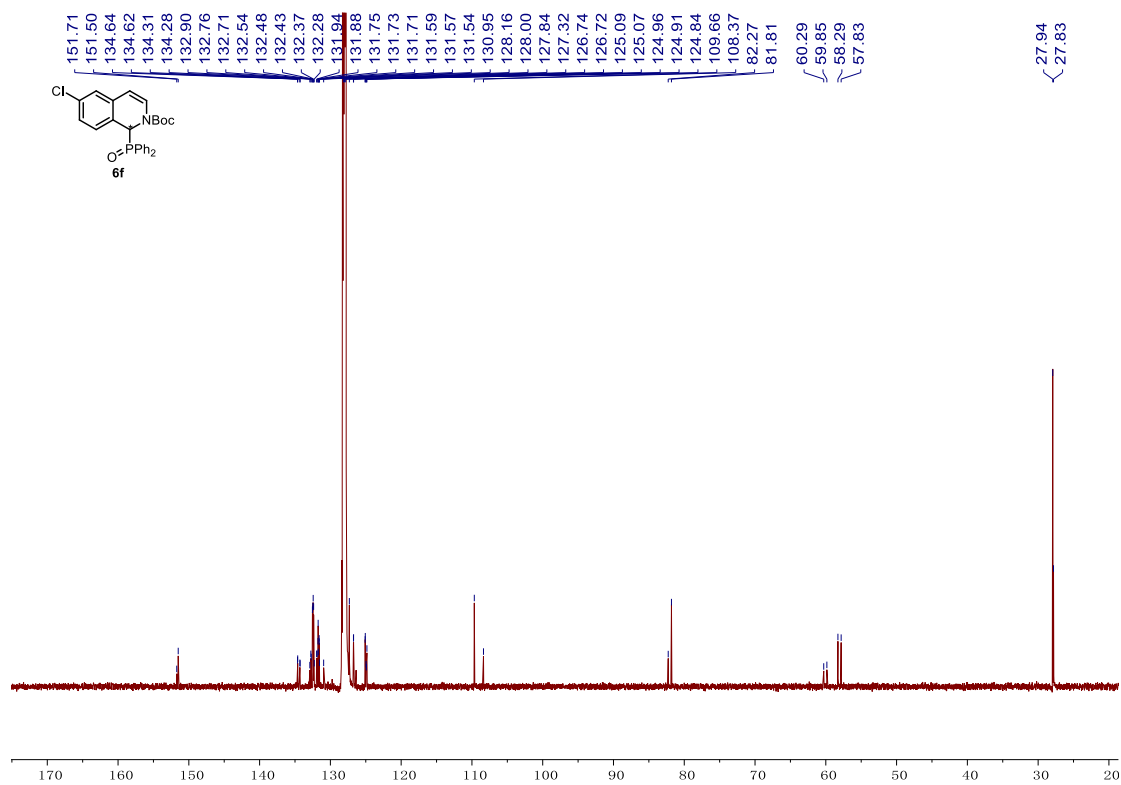

Fig.S 68 <sup>13</sup>C NMR of compound **6f**

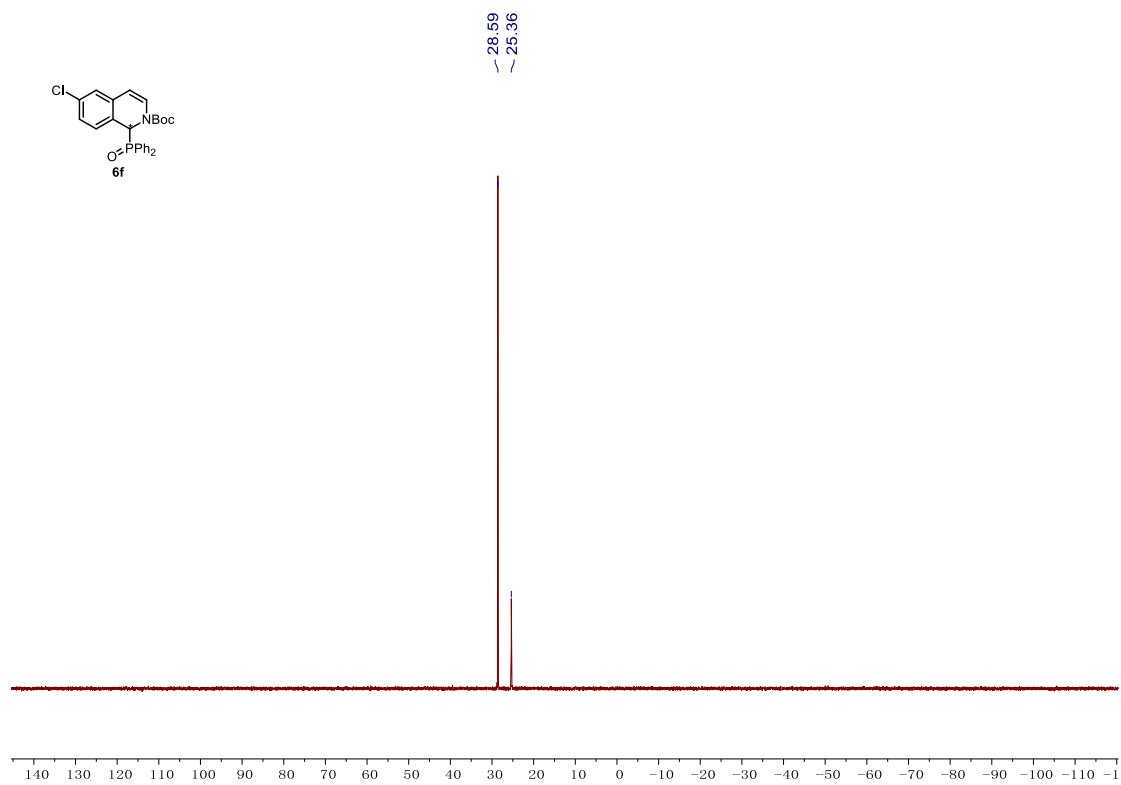

Fig.S 69 <sup>31</sup>P NMR of compound **6f**



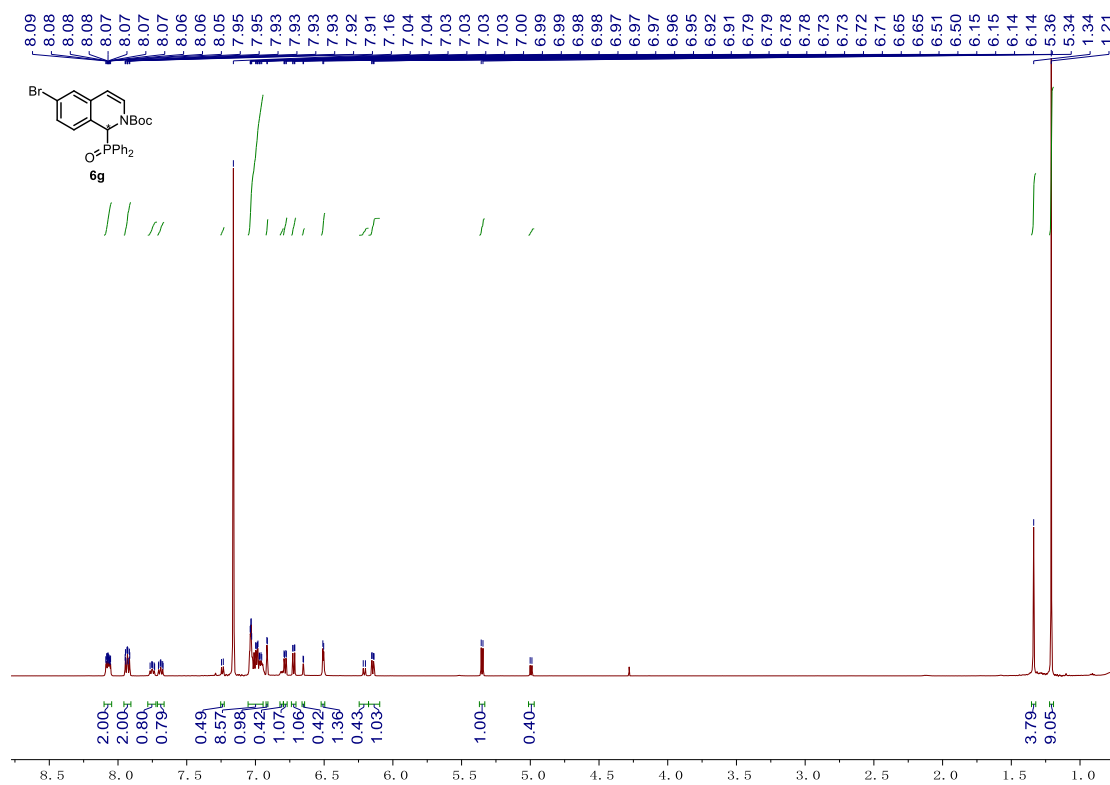

Fig.S 70  $^1\text{H}$  NMR of compound **6g**

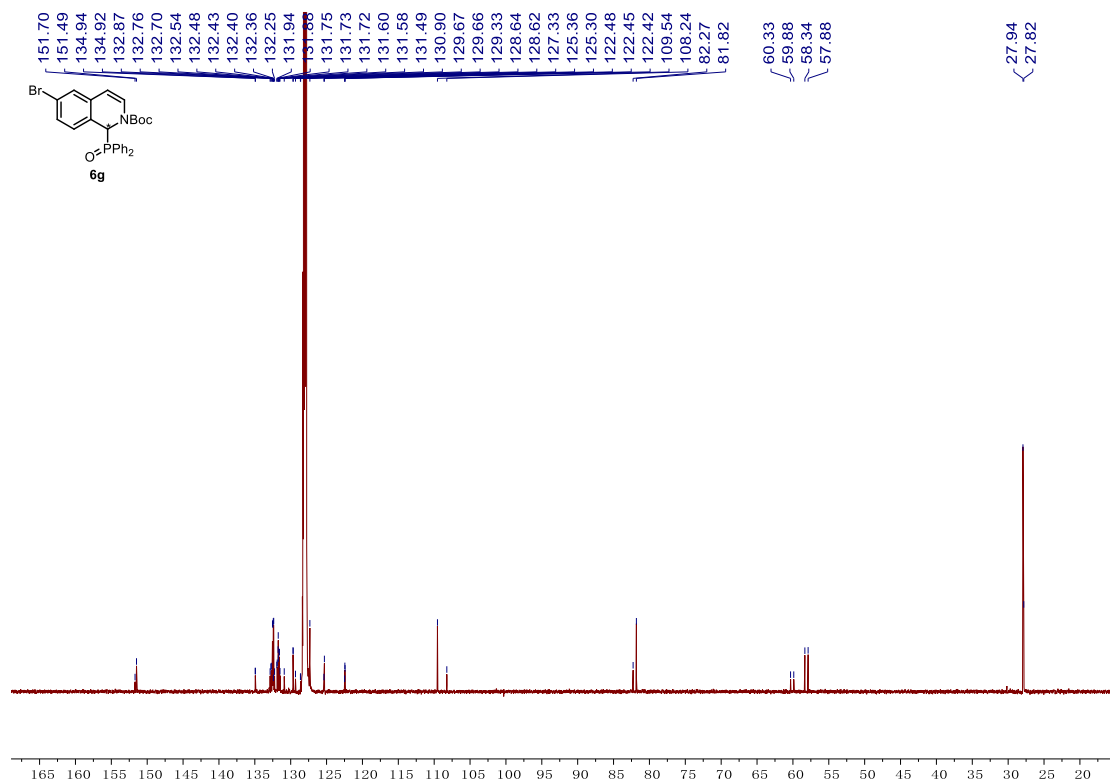

Fig.S 71  $^{13}\text{C}$  NMR of compound **6g**

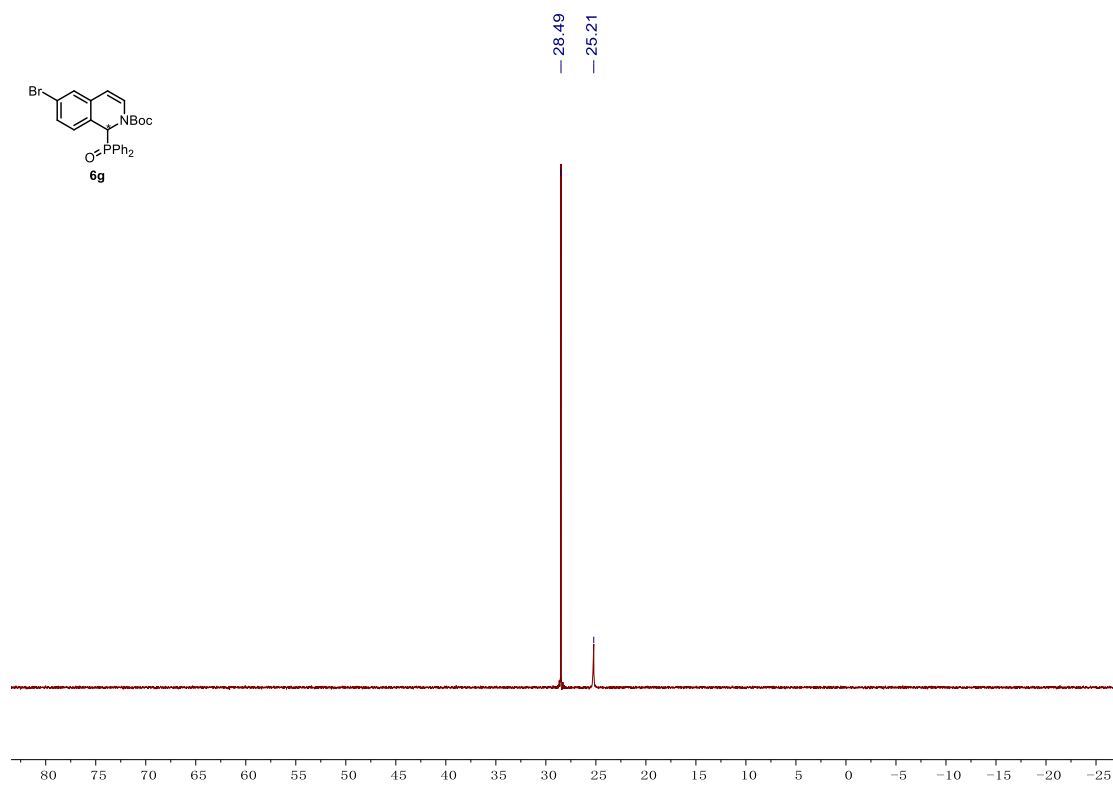

Fig.S 72  $^{31}\text{P}$  NMR of compound **6g**

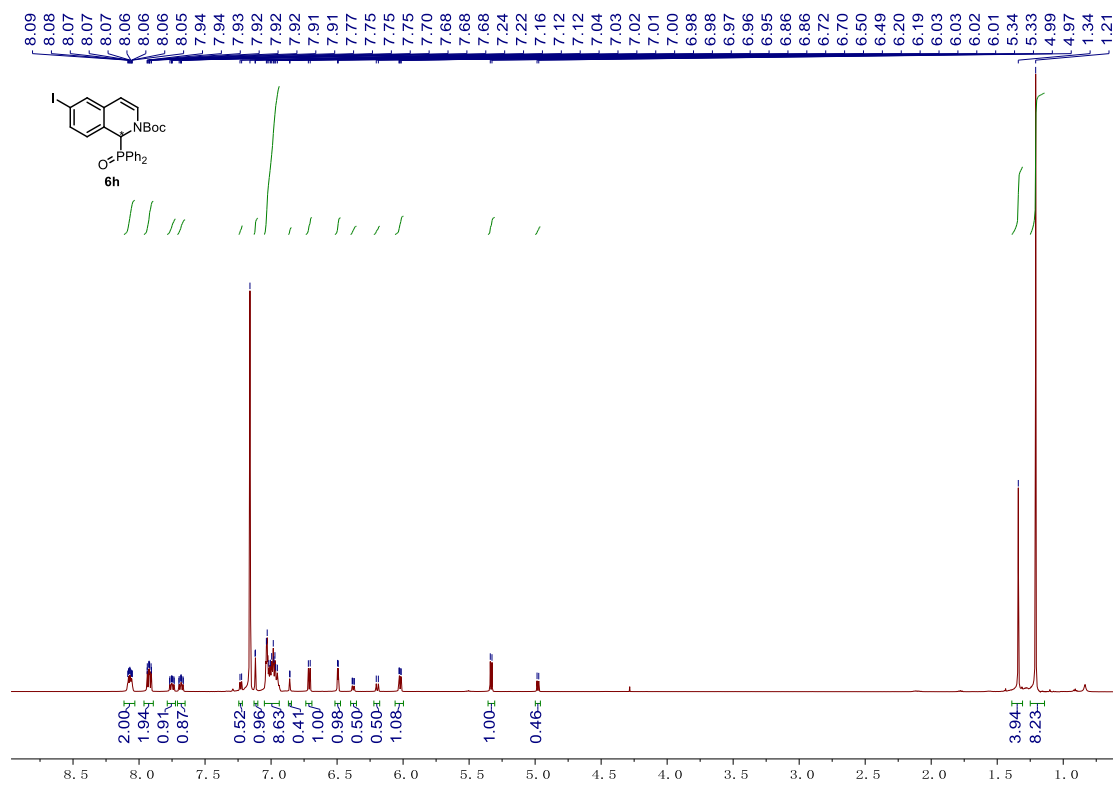

Fig.S 73  $^1\text{H}$  NMR of compound **6h**

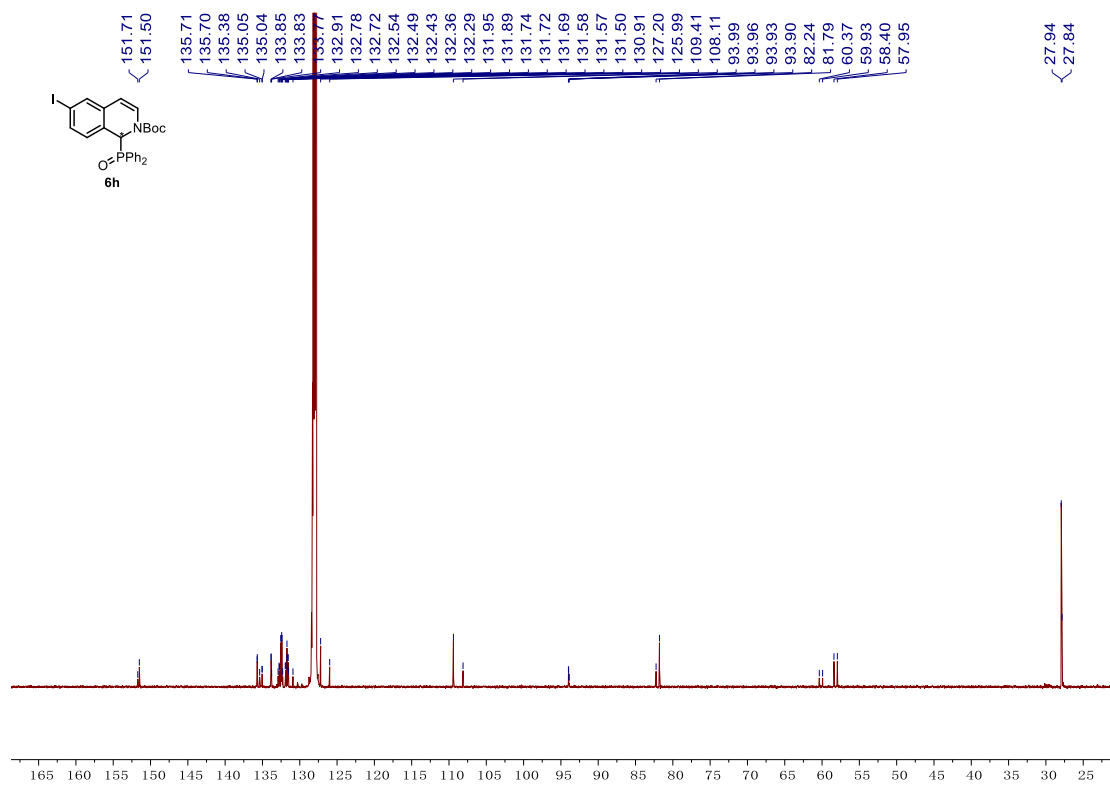

Fig.S 74 <sup>13</sup>C NMR of compound **6h**

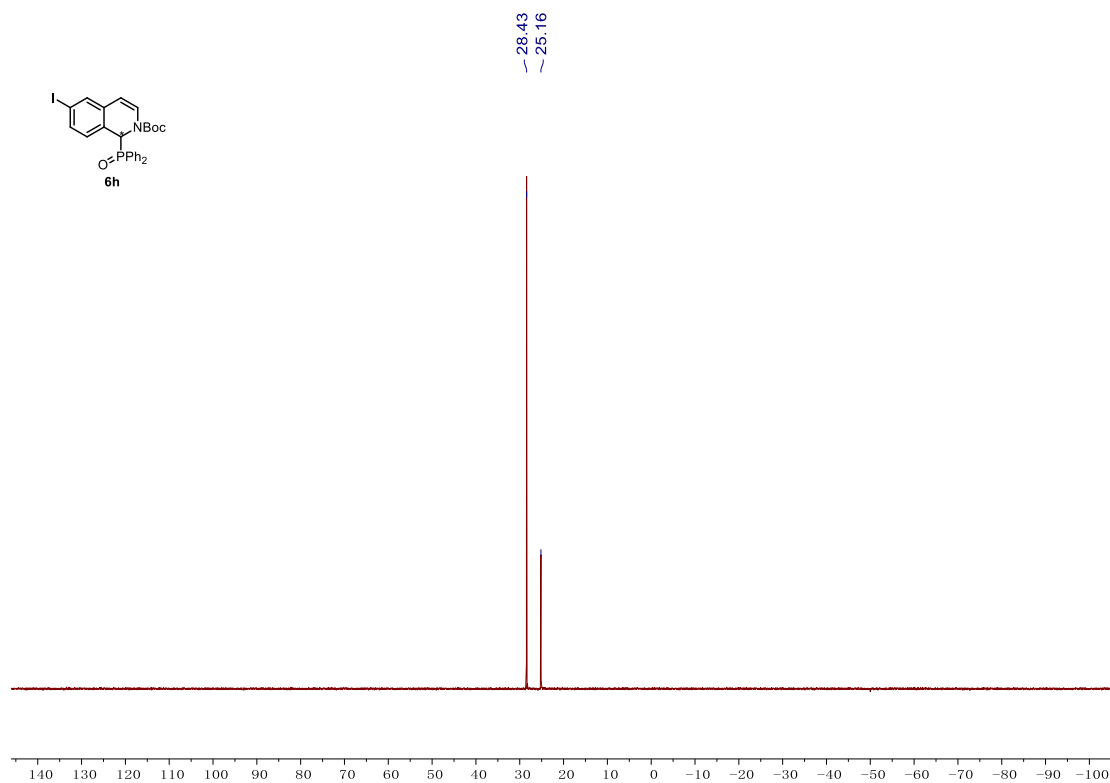

Fig.S 75 <sup>31</sup>P NMR of compound **6h**



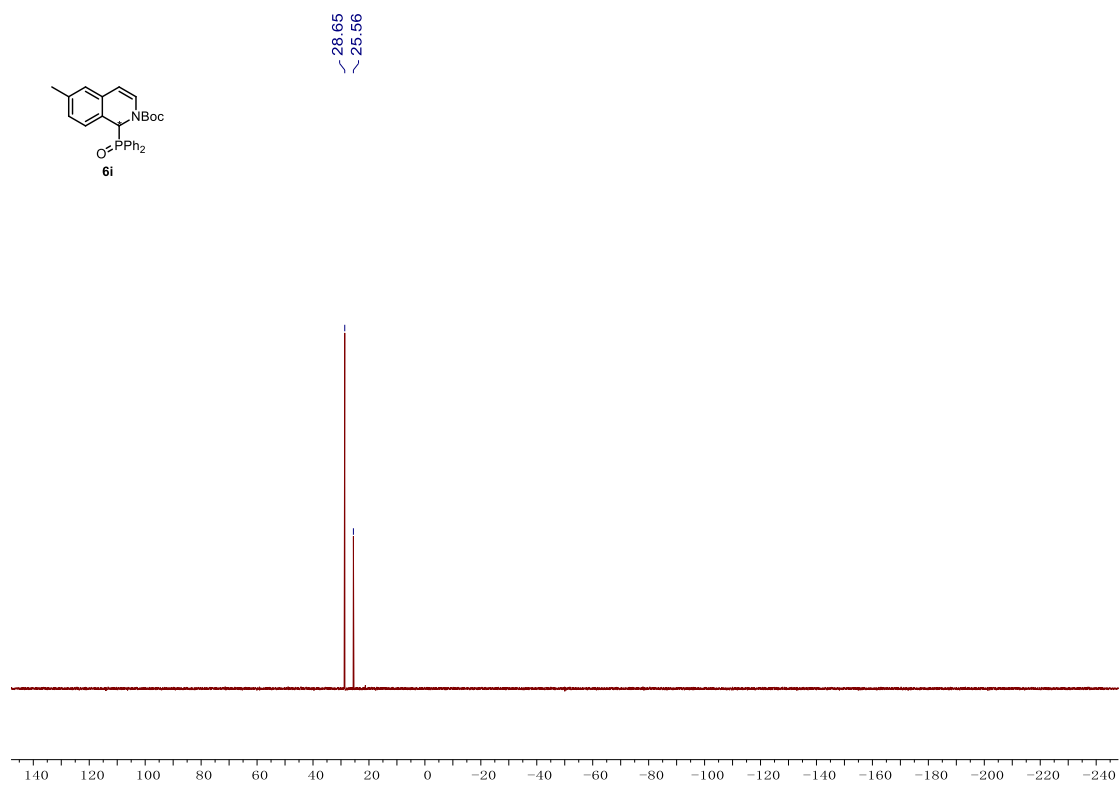

Fig.S 78  $^{31}\text{P}$  NMR of compound **6i**

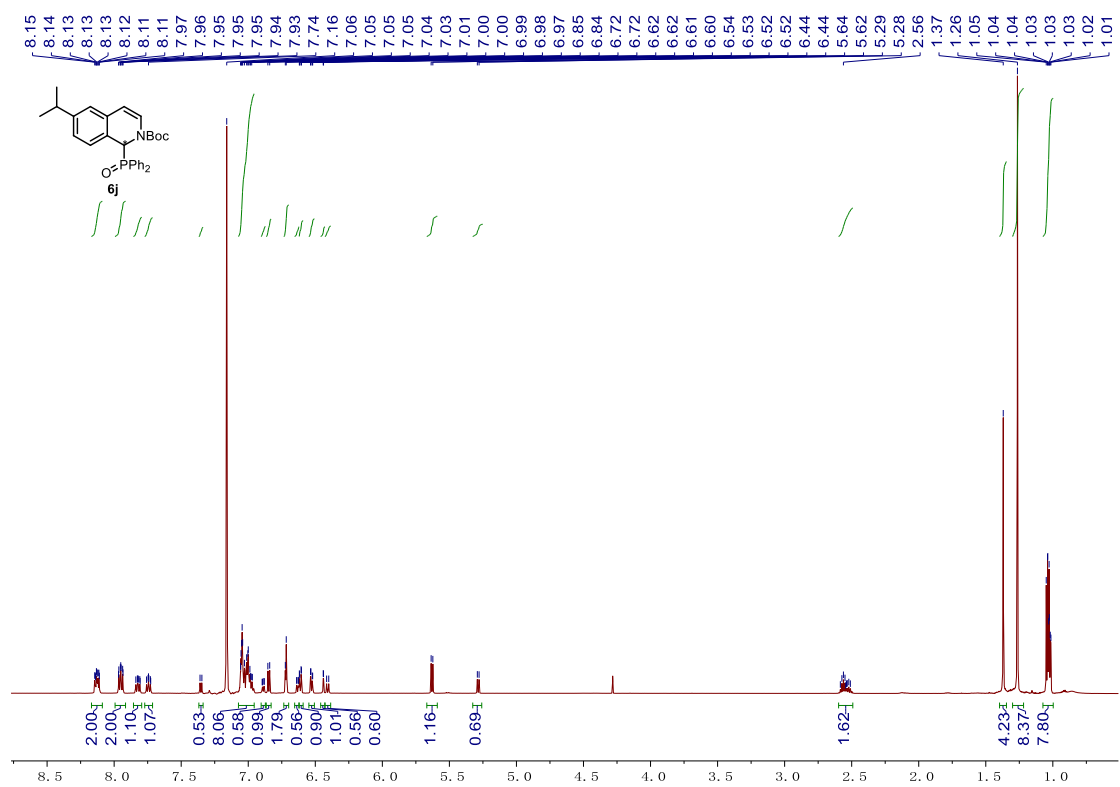

Fig.S 79  $^1\text{H}$  NMR of compound **6j**

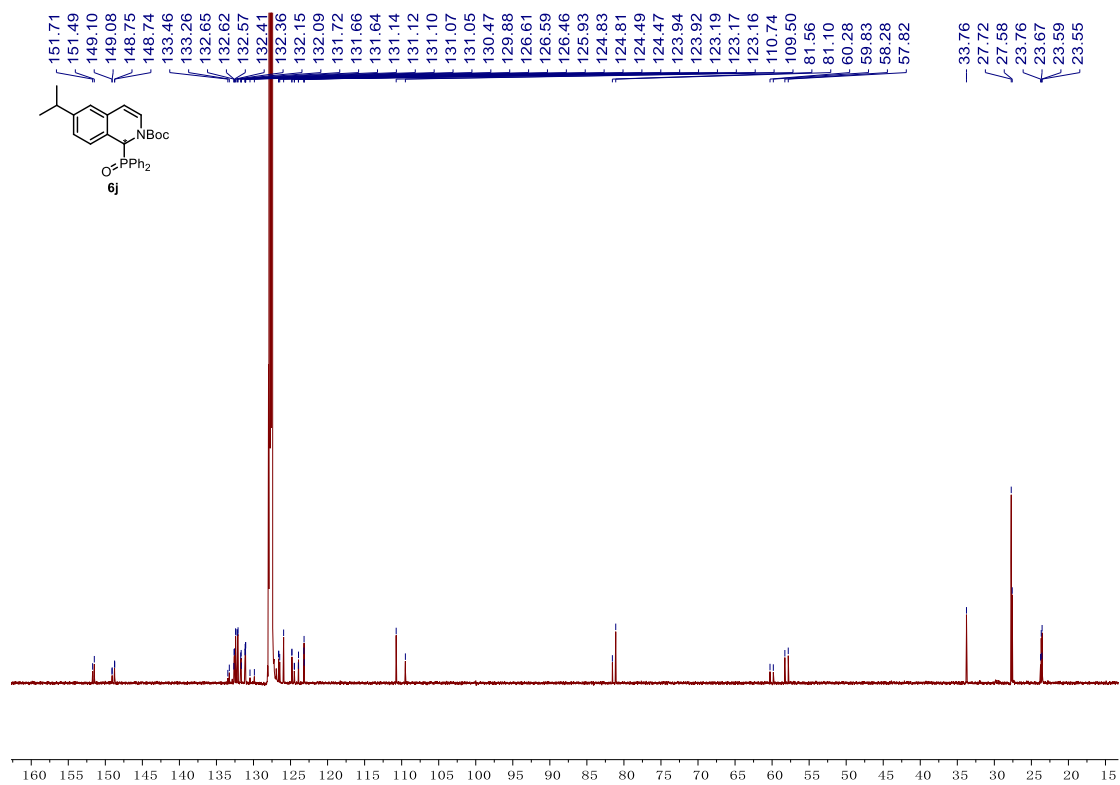

Fig.S 80 <sup>13</sup>C NMR of compound **6j**

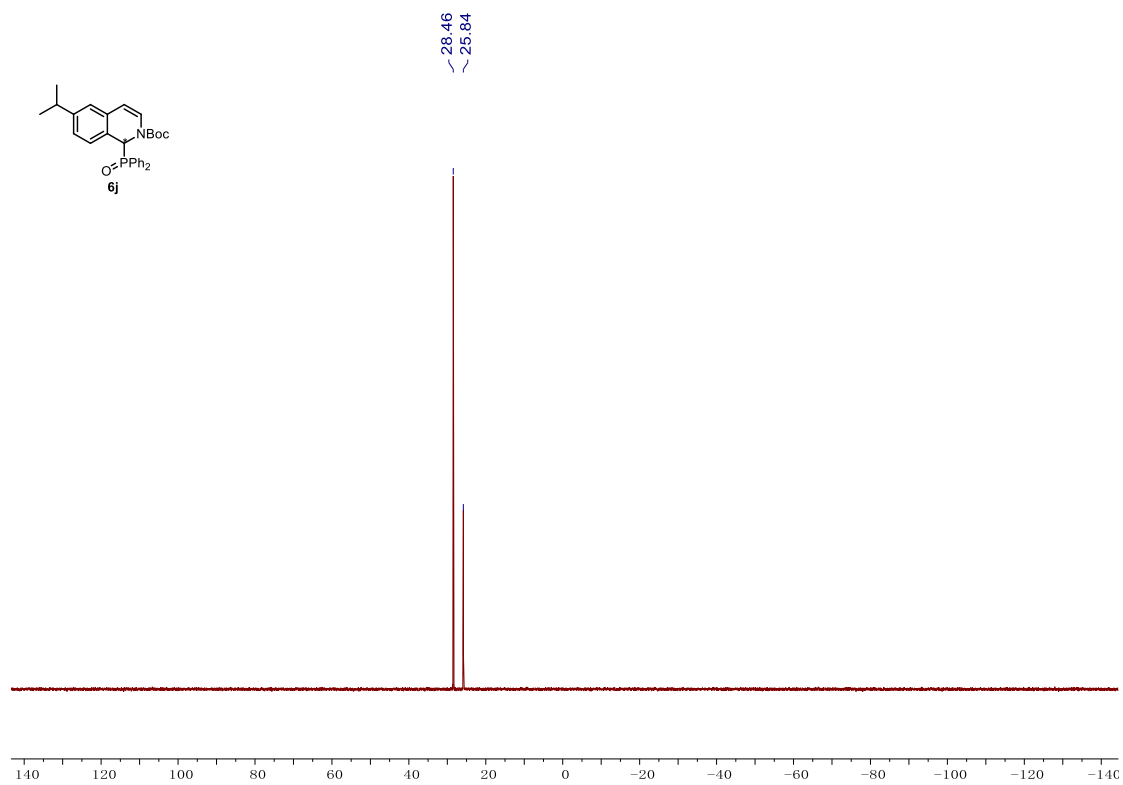

Fig.S 81 <sup>31</sup>P NMR of compound **6j**



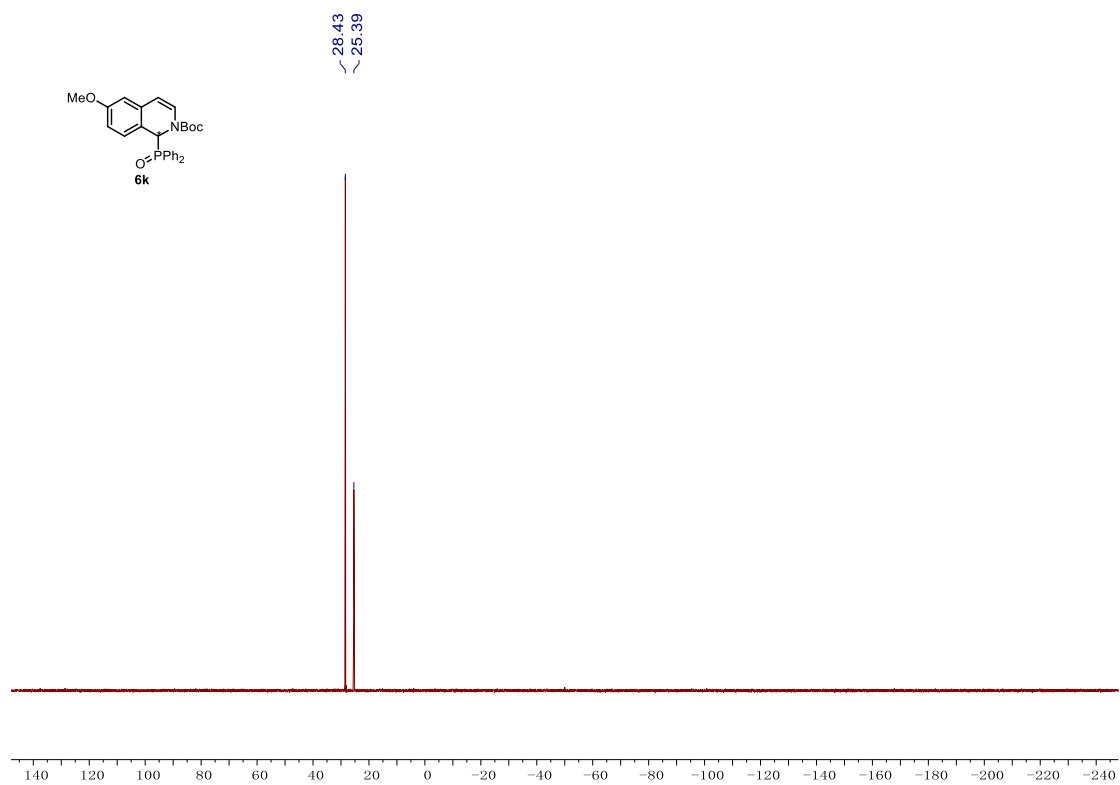

Fig.S 84  $^{31}\text{P}$  NMR of compound **6k**

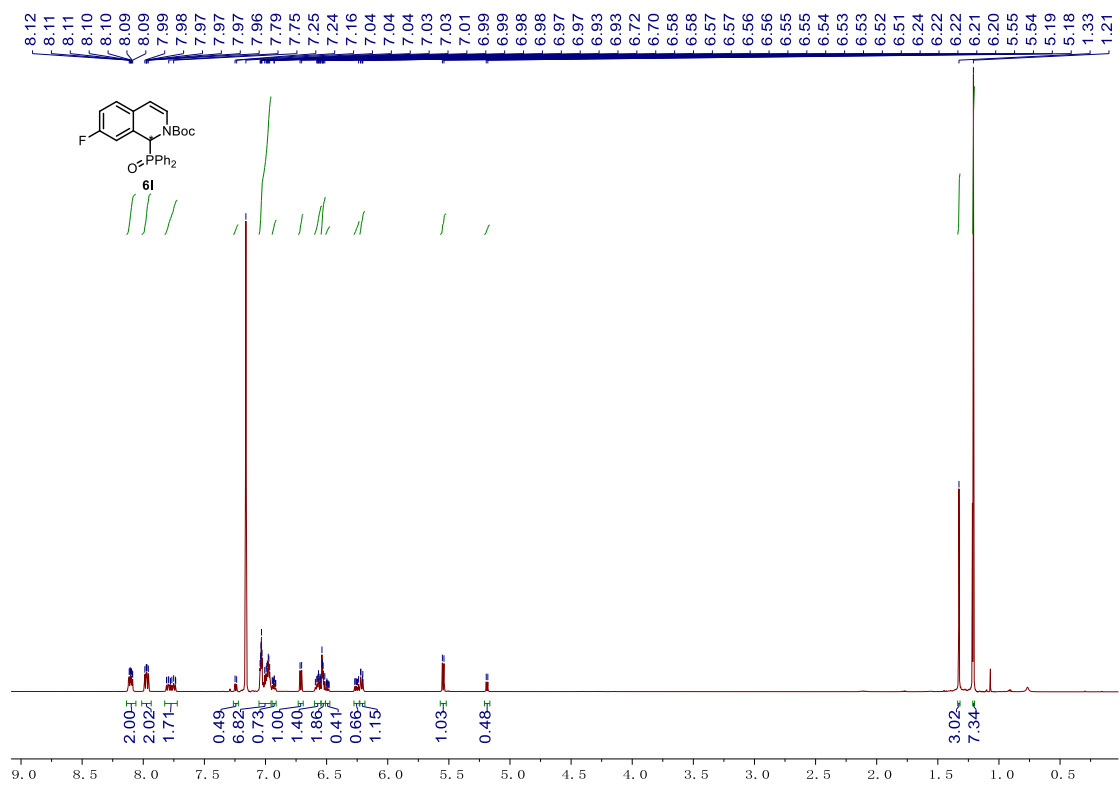

Fig.S 85  $^1\text{H}$  NMR of compound **6l**



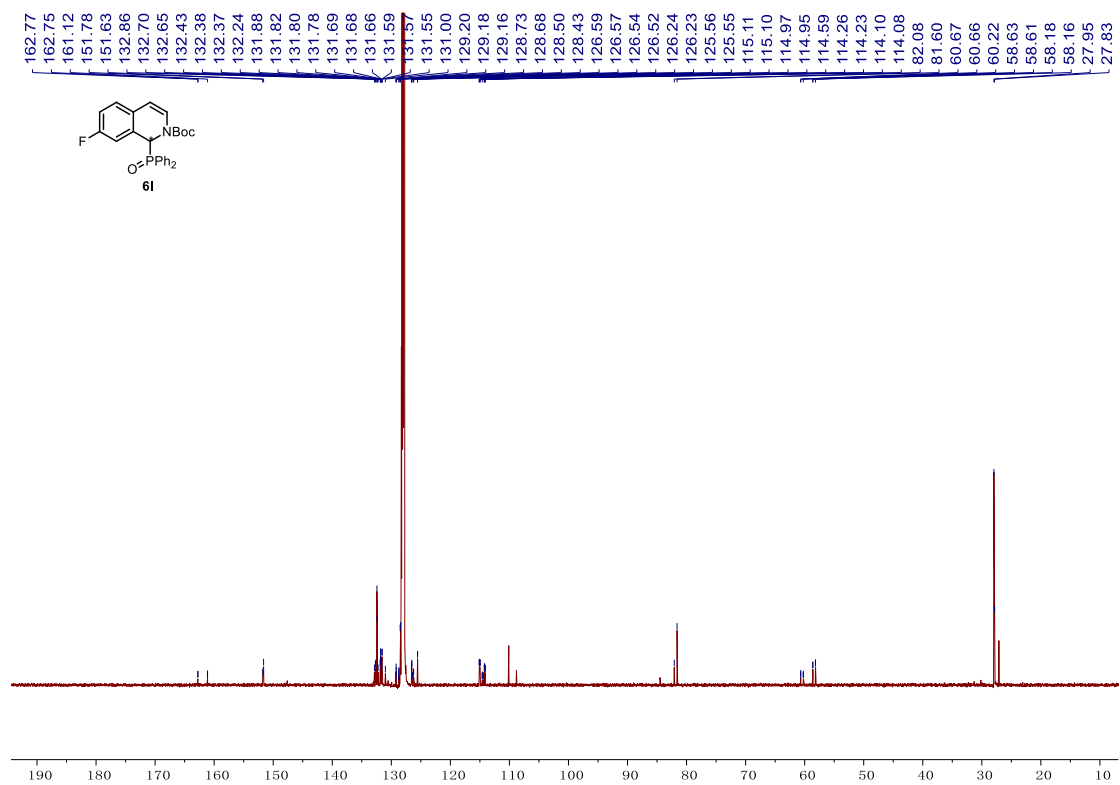

Fig.S 86 <sup>13</sup>C NMR of compound **6l**

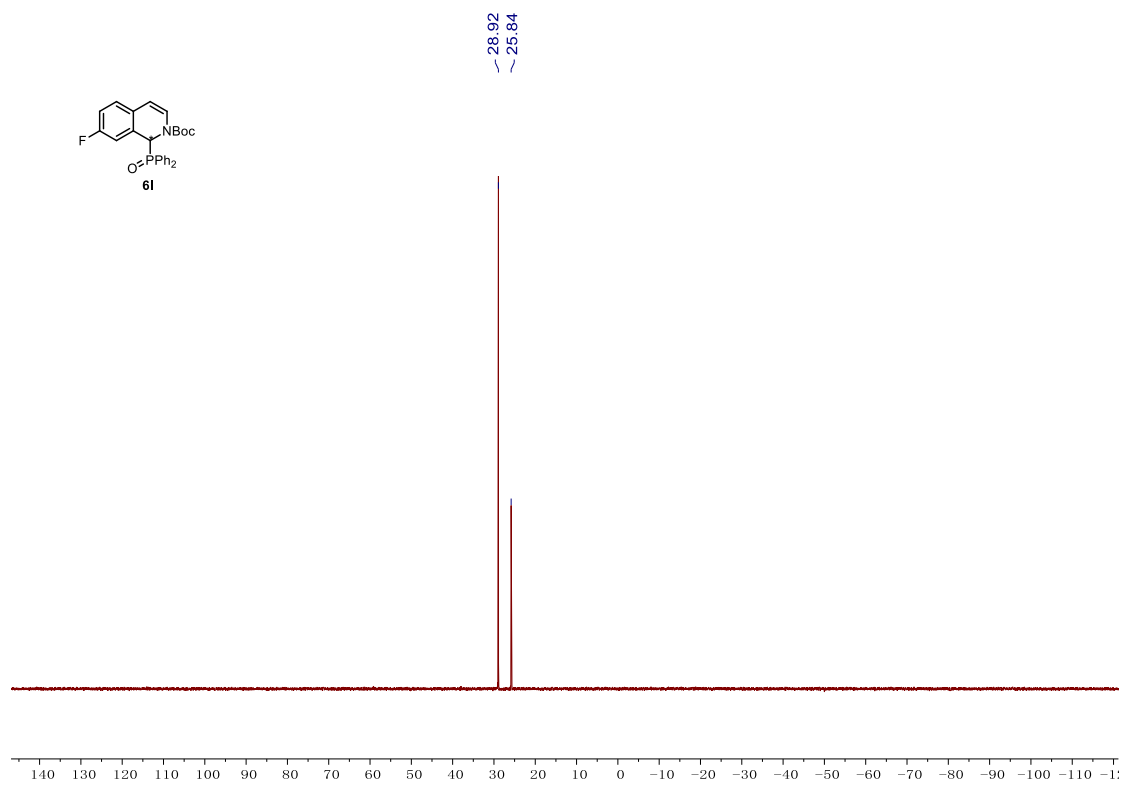

Fig.S 87 <sup>31</sup>P NMR of compound **6l**

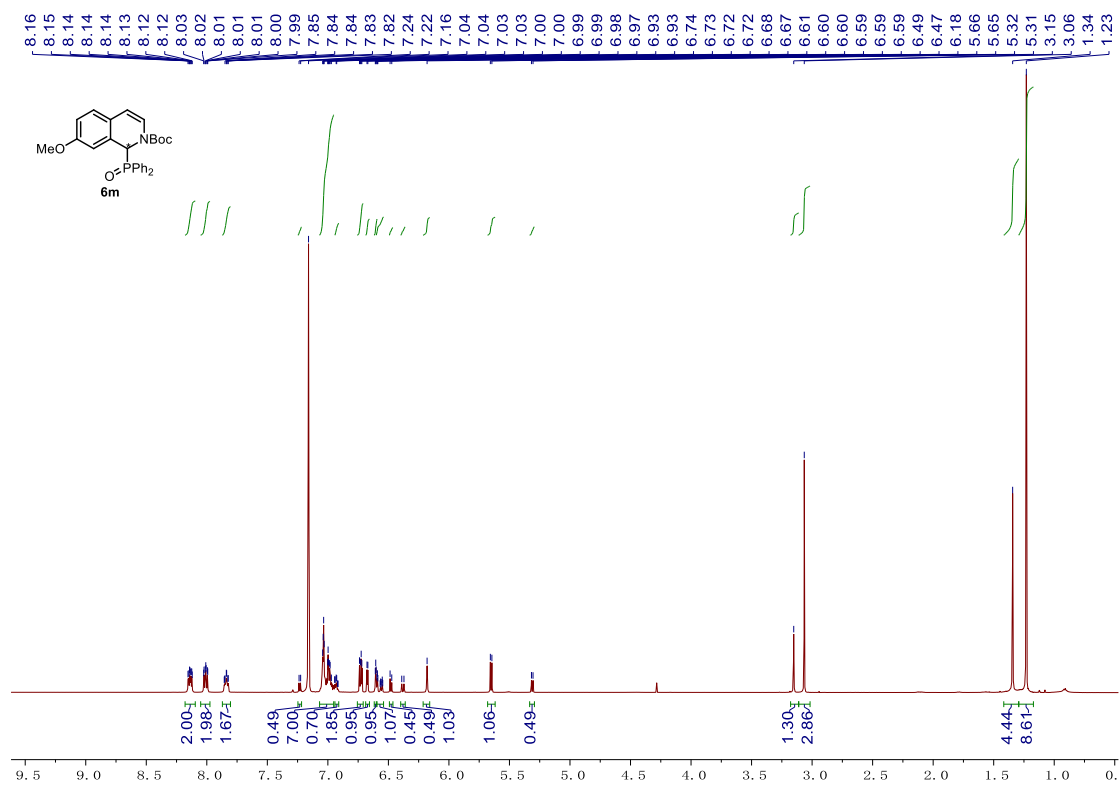

Fig.S 88 <sup>1</sup>H NMR of compound **6m**

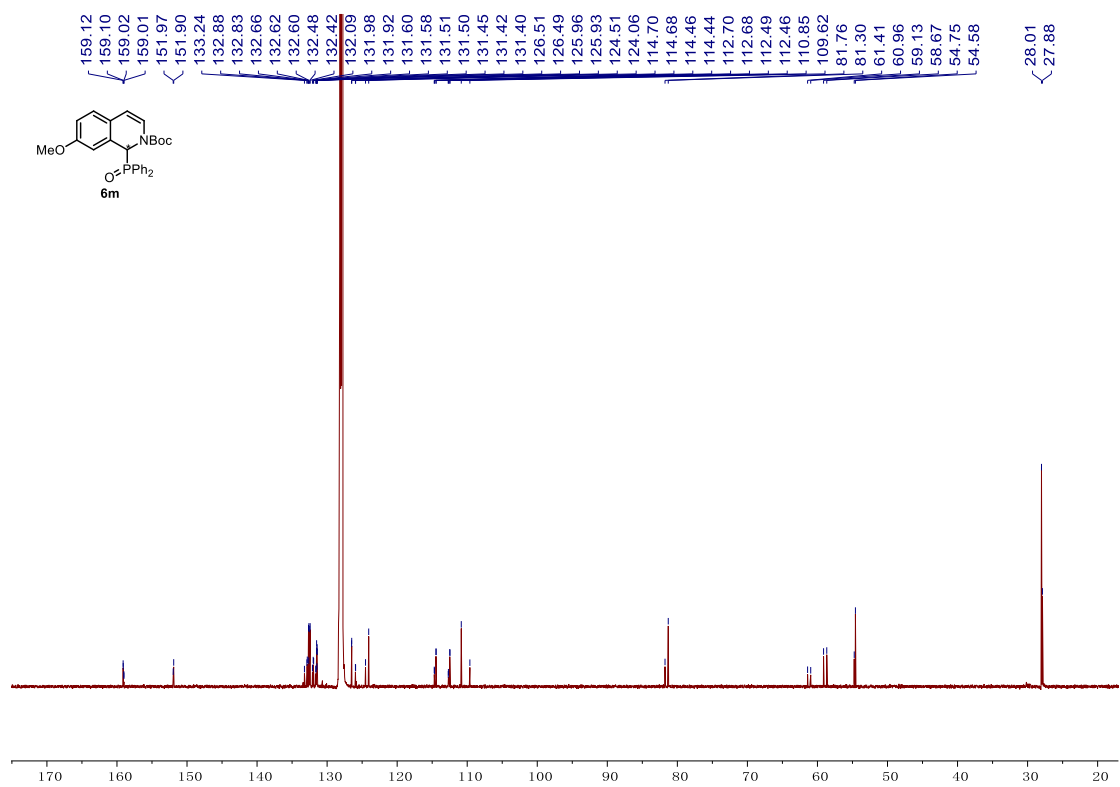

Fig.S 89 <sup>13</sup>C NMR of compound **6m**

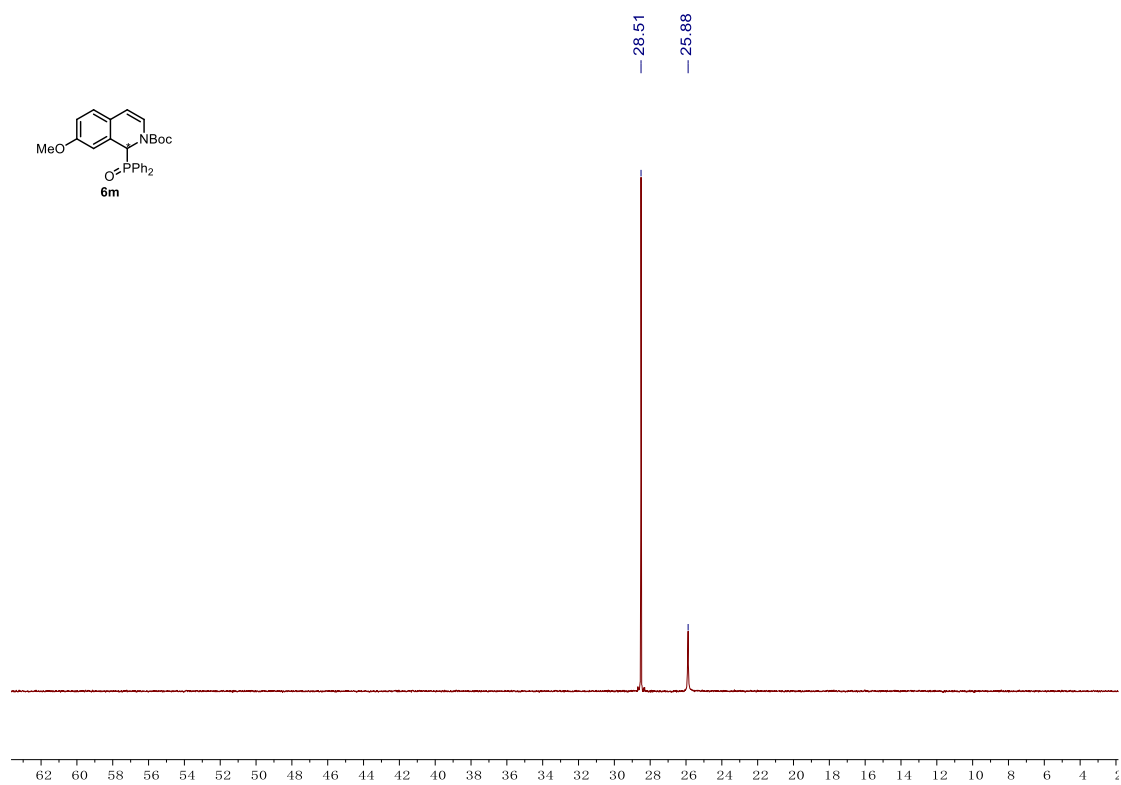

Fig.S 90  $^{31}\text{P}$  NMR of compound **6m**

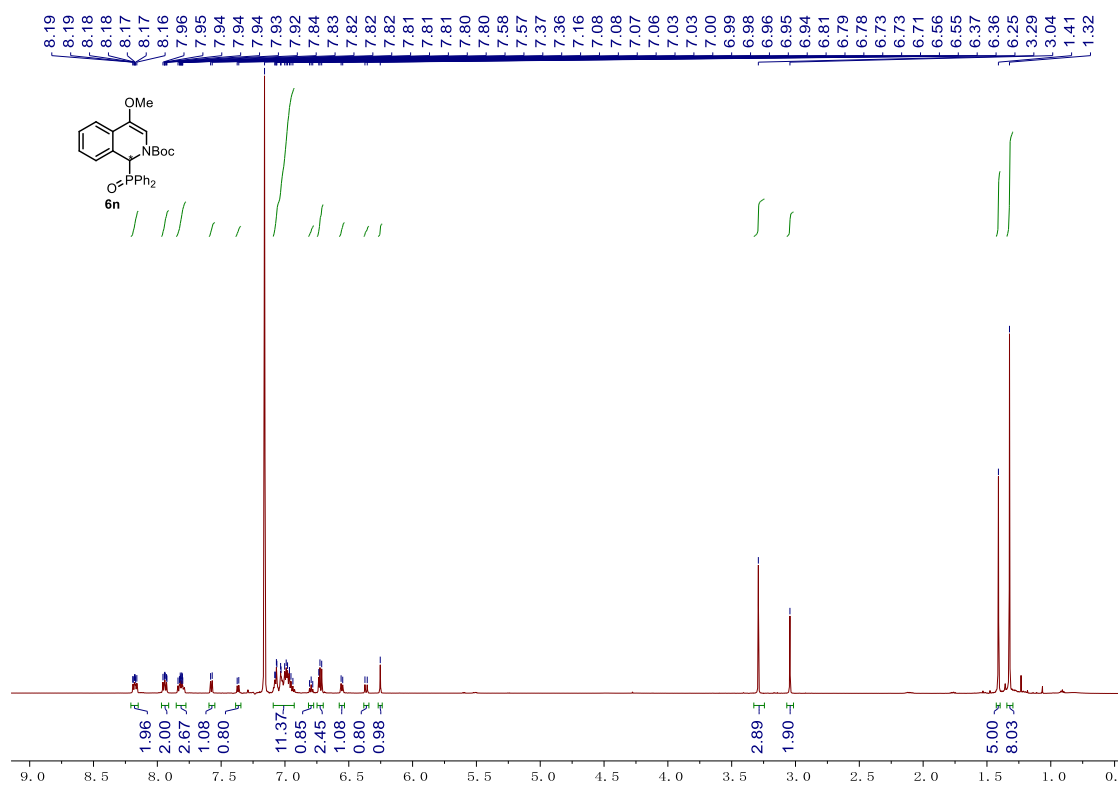

Fig.S 91  $^1\text{H}$  NMR of compound **6n**

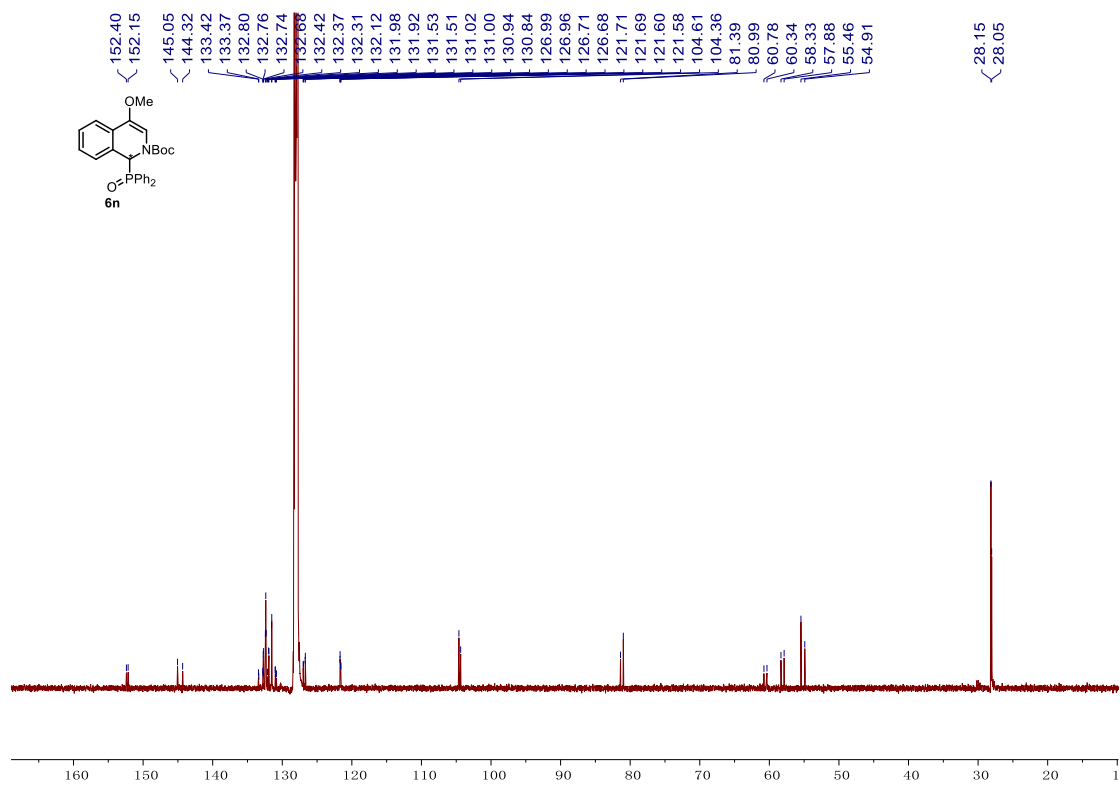

Fig.S 92 <sup>13</sup>C NMR of compound **6n**

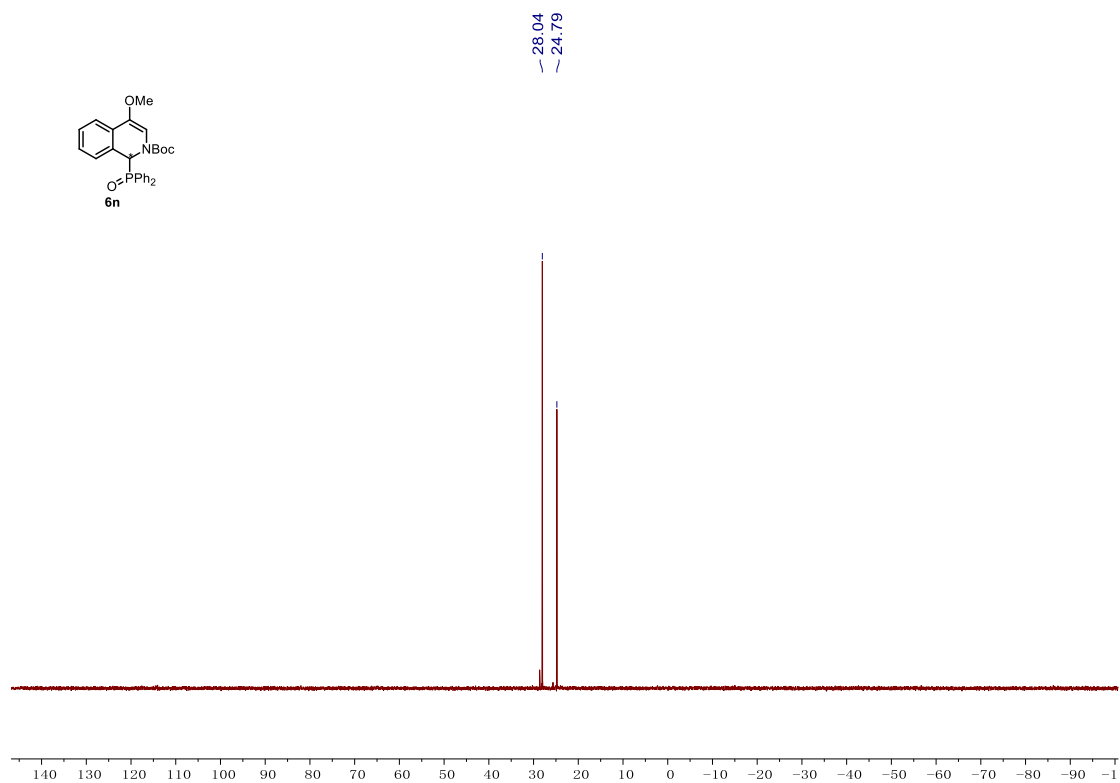

Fig.S 93 <sup>31</sup>P NMR of compound **6n**

#### 4. HPLC of 1,2-dihydroisoquinoline-1-ylphosphonates **4**

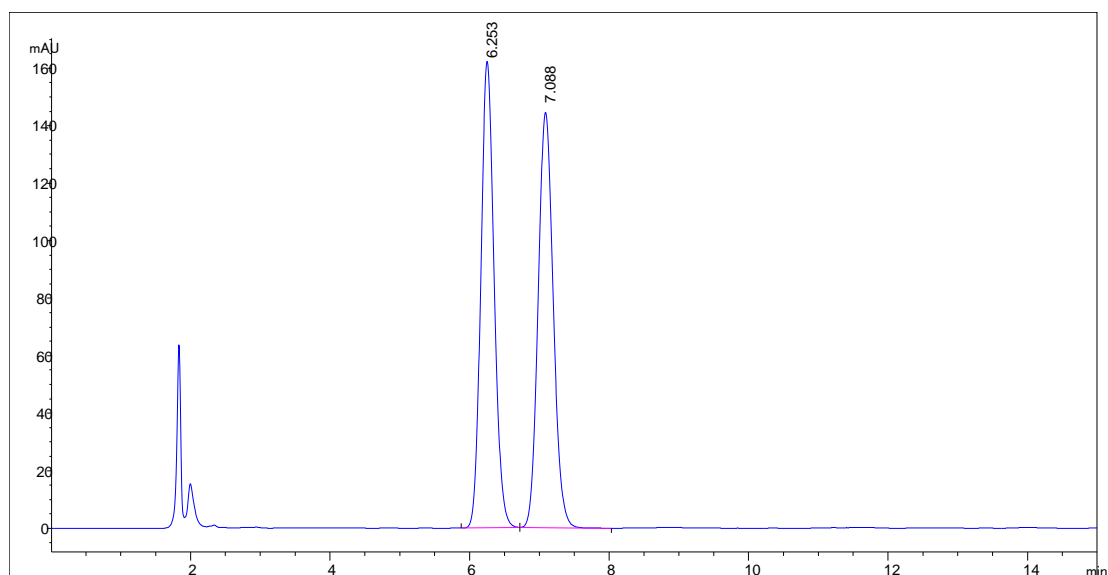

| # | Time (min) | Area (mAU*s) | Height(mAU) | Area % |
|---|------------|--------------|-------------|--------|
| 1 | 6.253      | 2163.2       | 162.2       | 49.986 |
| 2 | 7.088      | 2164.4       | 144.5       | 50.014 |

Fig.S 94 HPLC for racemic compound **4aa**

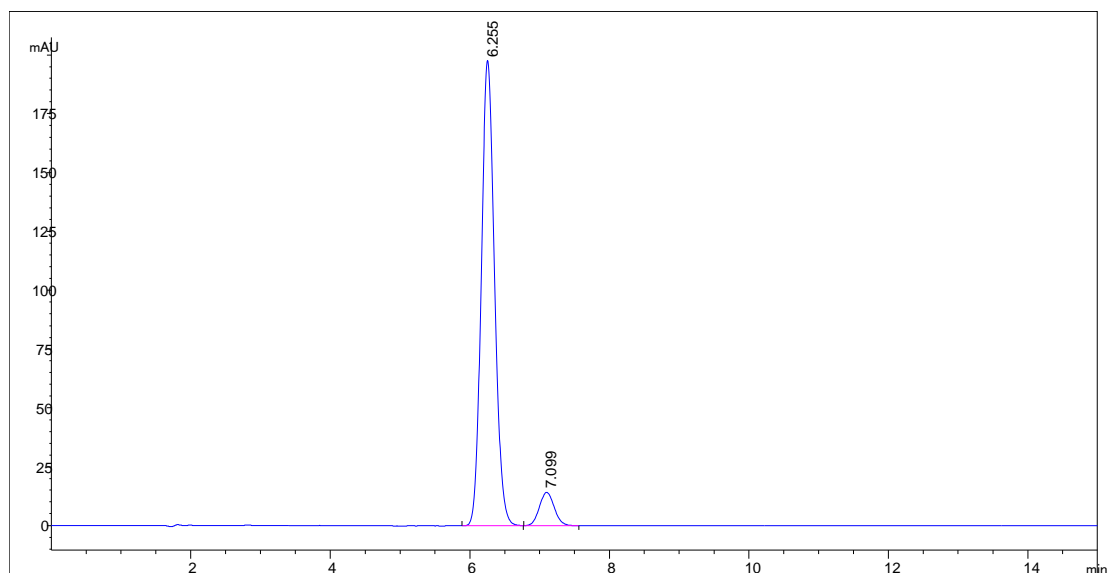

| # | Time (min) | Area (mAU*s) | Height(mAU) | Area % |
|---|------------|--------------|-------------|--------|
| 1 | 6.255      | 2624.1       | 197.6       | 92.693 |
| 2 | 7.099      | 206.9        | 14.1        | 7.307  |

Fig.S 95 HPLC for pure enantioenriched compound **4aa**

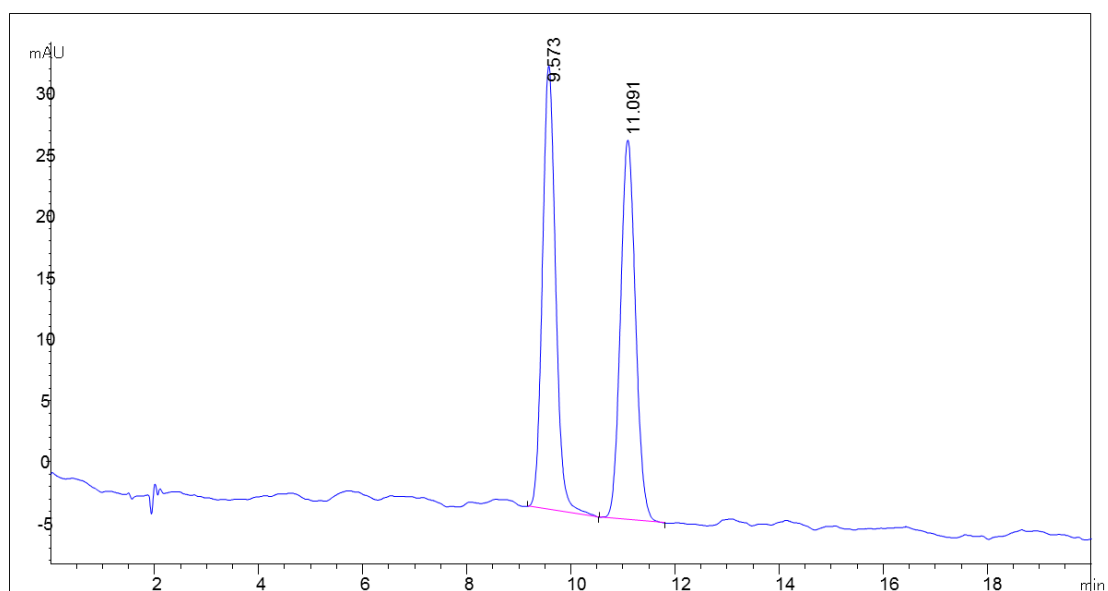

| # | Time (min) | Area (mAU*s) | Height(mAU) | Area % |
|---|------------|--------------|-------------|--------|
| 1 | 9.573      | 635.7        | 36.1        | 50.583 |
| 2 | 11.091     | 621          | 30.9        | 49.417 |

Fig.S 96 HPLC for racemic compound **4ab**

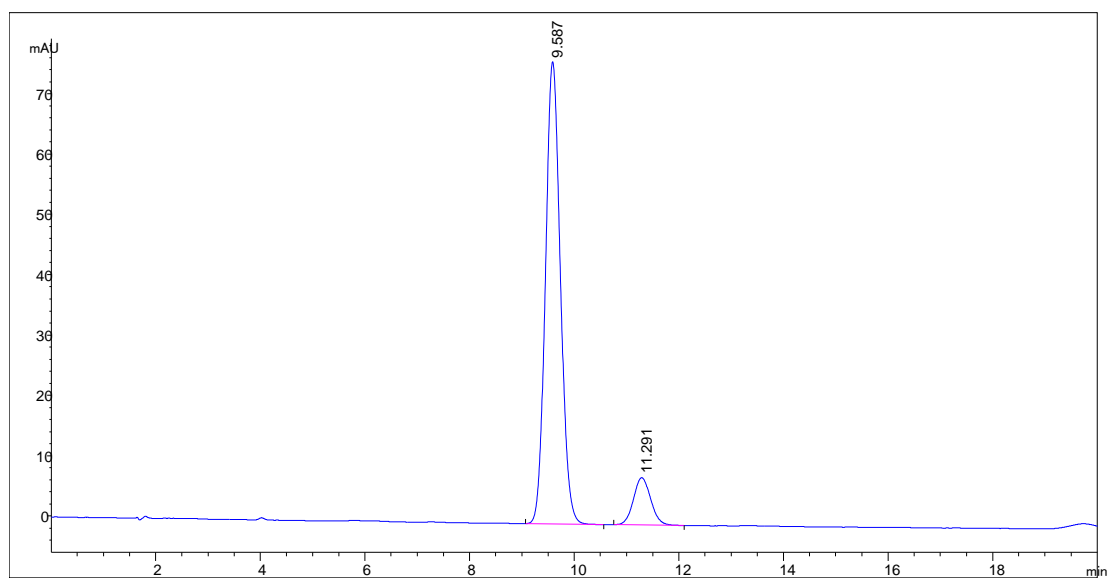

| # | Time (min) | Area (mAU*s) | Height(mAU) | Area % |
|---|------------|--------------|-------------|--------|
| 1 | 9.587      | 1516.1       | 76.6        | 89.436 |
| 2 | 11.291     | 179.1        | 7.8         | 10.564 |

Fig.S 97 HPLC for pure enantioenriched compound **4ab**

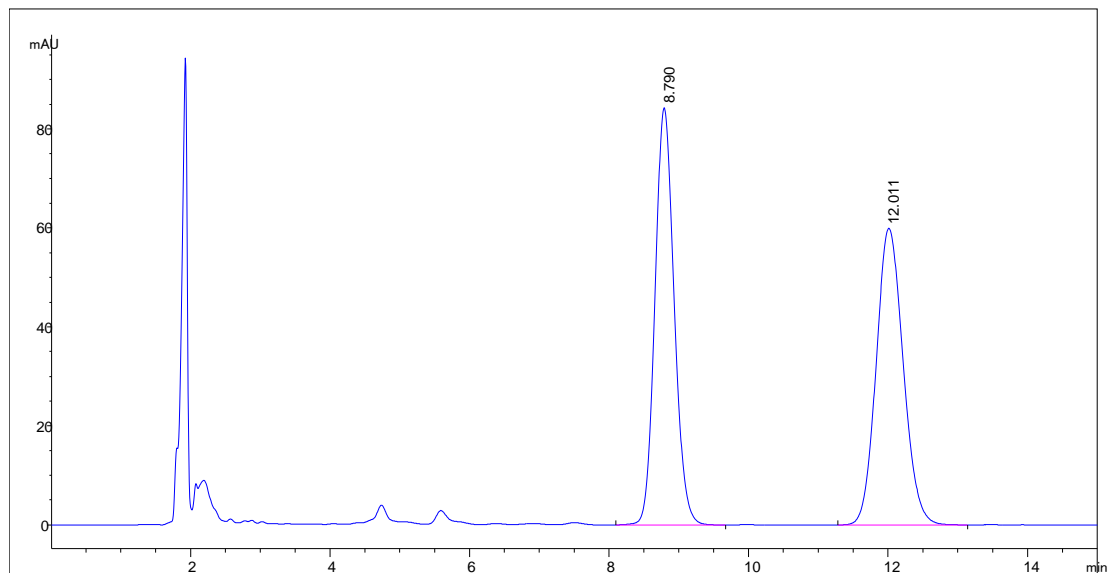

| # | Time (min) | Area (mAU*s) | Height(mAU) | Area % |
|---|------------|--------------|-------------|--------|
| 1 | 8.79       | 1614.9       | 84.4        | 50.082 |
| 2 | 12.011     | 1609.7       | 60          | 49.918 |

Fig.S 98 HPLC for racemic compound **4ac**

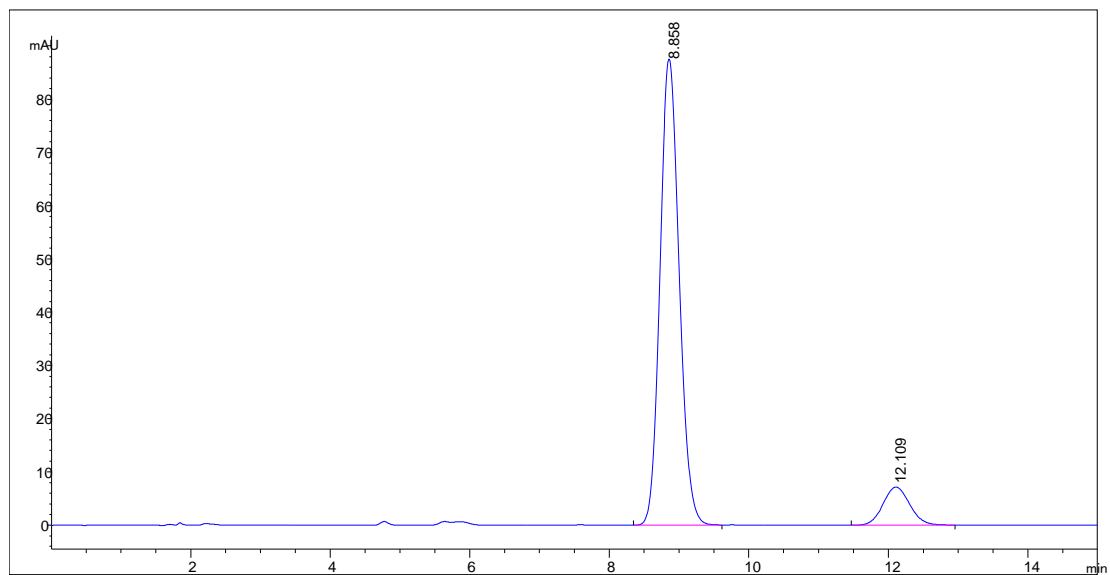

| # | Time (min) | Area (mAU*s) | Height(mAU) | Area % |
|---|------------|--------------|-------------|--------|
| 1 | 8.858      | 1670.6       | 87.5        | 89.882 |
| 2 | 12.109     | 188.1        | 7.1         | 10.118 |

Fig.S 99 HPLC for pure enantioenriched compound **4ac**

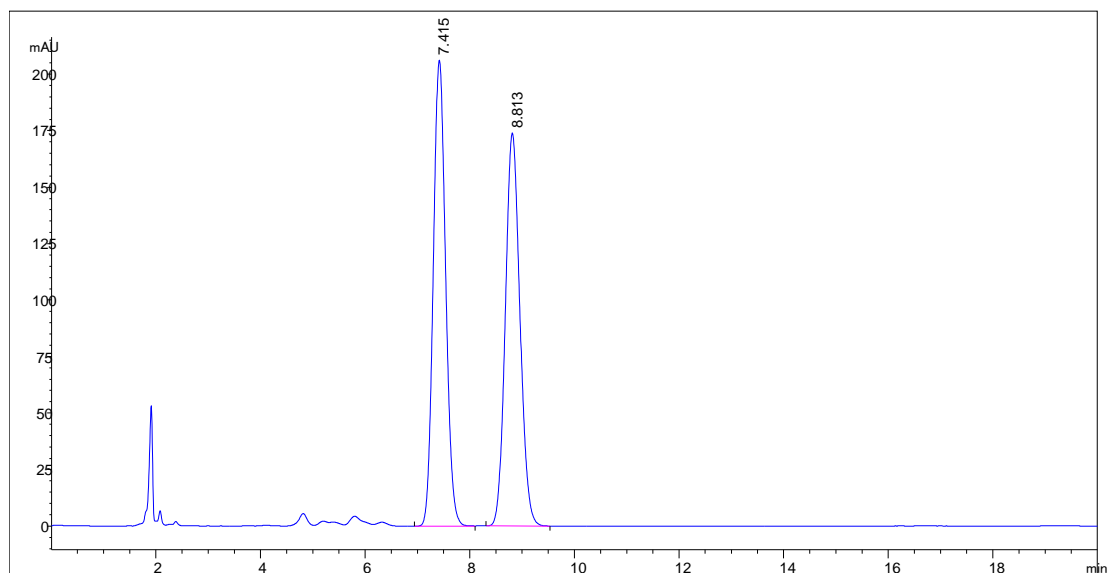

| # | Time (min) | Area (mAU*s) | Height(mAU) | Area % |
|---|------------|--------------|-------------|--------|
| 1 | 7.415      | 3378.8       | 206.3       | 50.064 |
| 2 | 8.813      | 3370.2       | 174         | 49.936 |

Fig.S 100 HPLC for racemic compound **4ad**

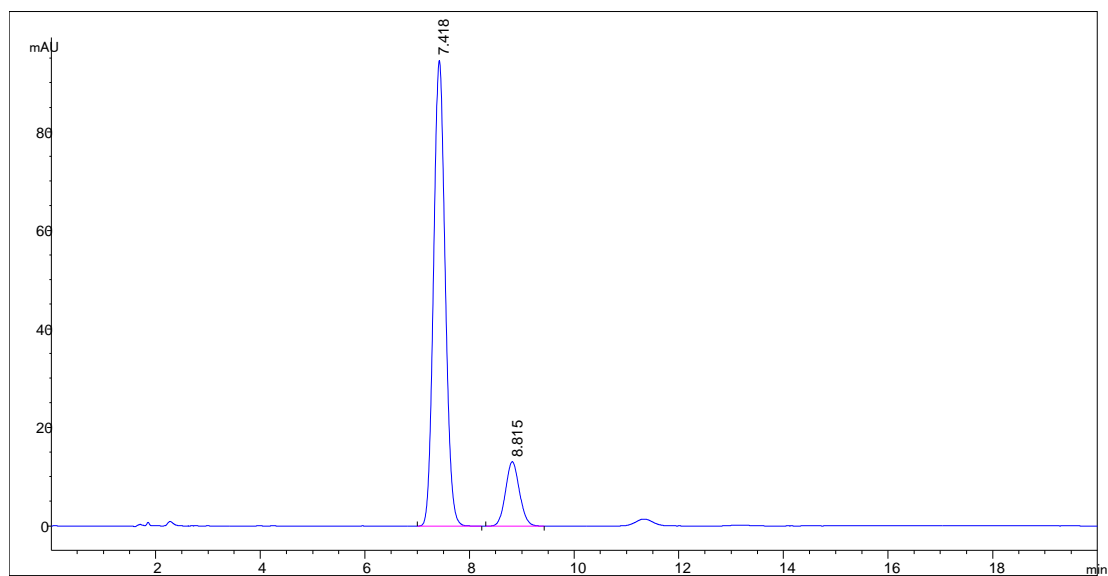

| # | Time (min) | Area (mAU*s) | Height(mAU) | Area % |
|---|------------|--------------|-------------|--------|
| 1 | 7.418      | 1456.6       | 94.5        | 85.771 |
| 2 | 8.815      | 241.7        | 13.1        | 14.229 |

Fig.S 101 HPLC for pure enantioenriched compound **4ad**



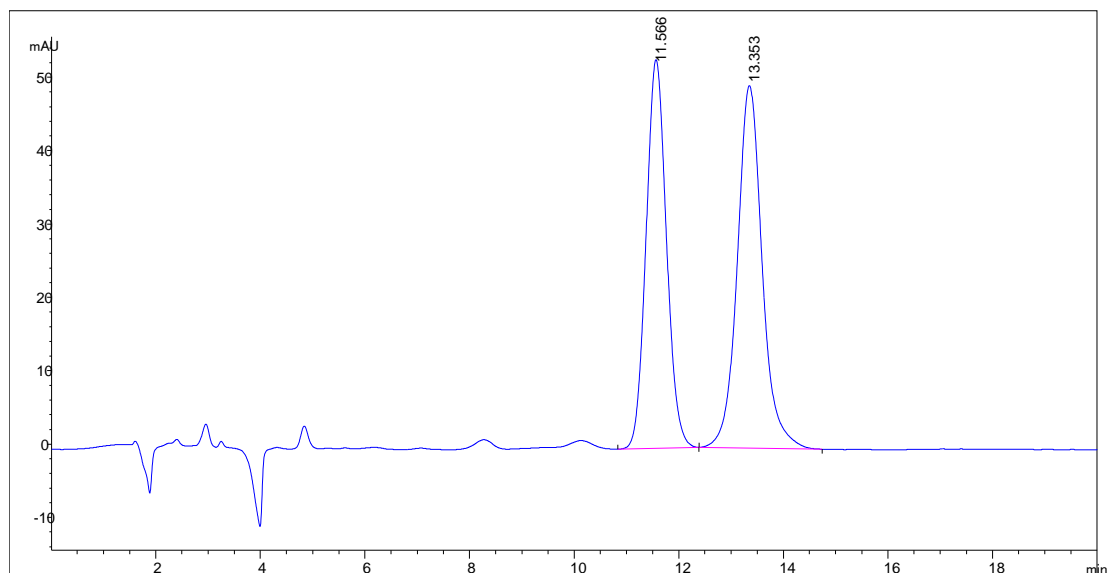

| # | Time (min) | Area (mAU*s) | Height(mAU) | Area % |
|---|------------|--------------|-------------|--------|
| 1 | 11.566     | 1430.9       | 53          | 46.717 |
| 2 | 13.353     | 1632         | 49.4        | 53.283 |

Fig.S 102 HPLC for racemic compound **4ba**

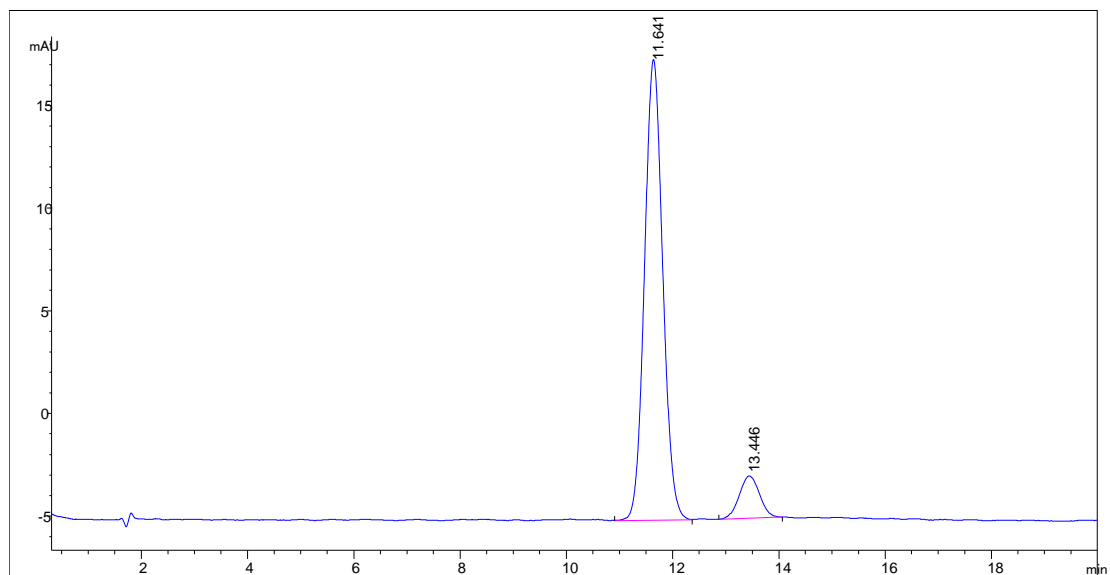

| # | Time (min) | Area (mAU*s) | Height(mAU) | Area % |
|---|------------|--------------|-------------|--------|
| 1 | 11.641     | 534.8        | 22.4        | 90.716 |
| 2 | 13.446     | 54.7         | 2.1         | 9.284  |

Fig.S 103 HPLC for pure enantioenriched compound **4ba**

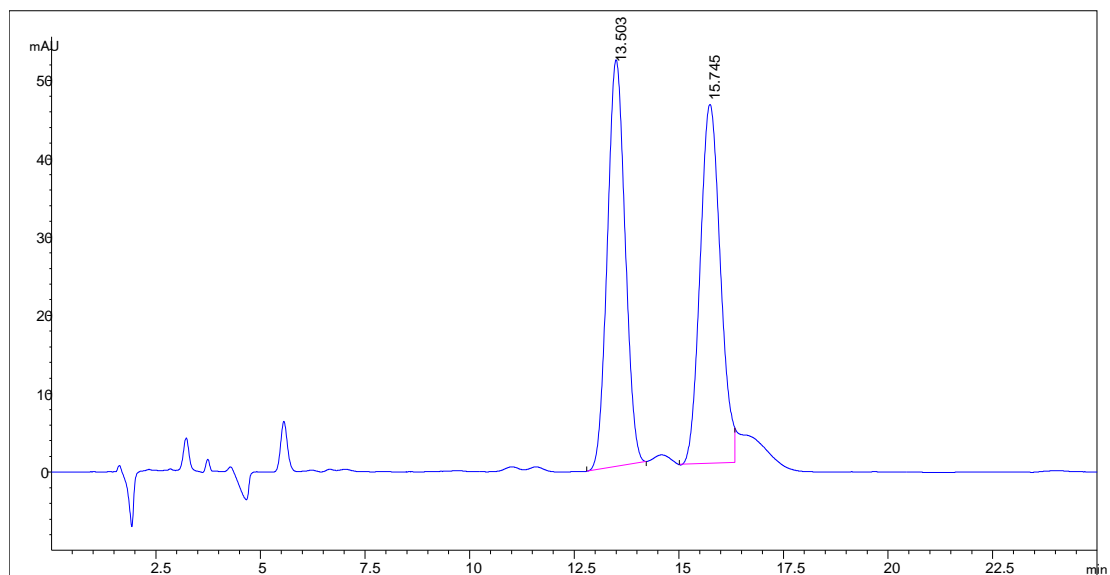

| # | Time (min) | Area (mAU*s) | Height(mAU) | Area % |
|---|------------|--------------|-------------|--------|
| 1 | 13.503     | 1535.9       | 51.9        | 49.921 |
| 2 | 15.745     | 1540.8       | 45.8        | 50.079 |

Fig.S 104 HPLC for racemic compound **4ca**

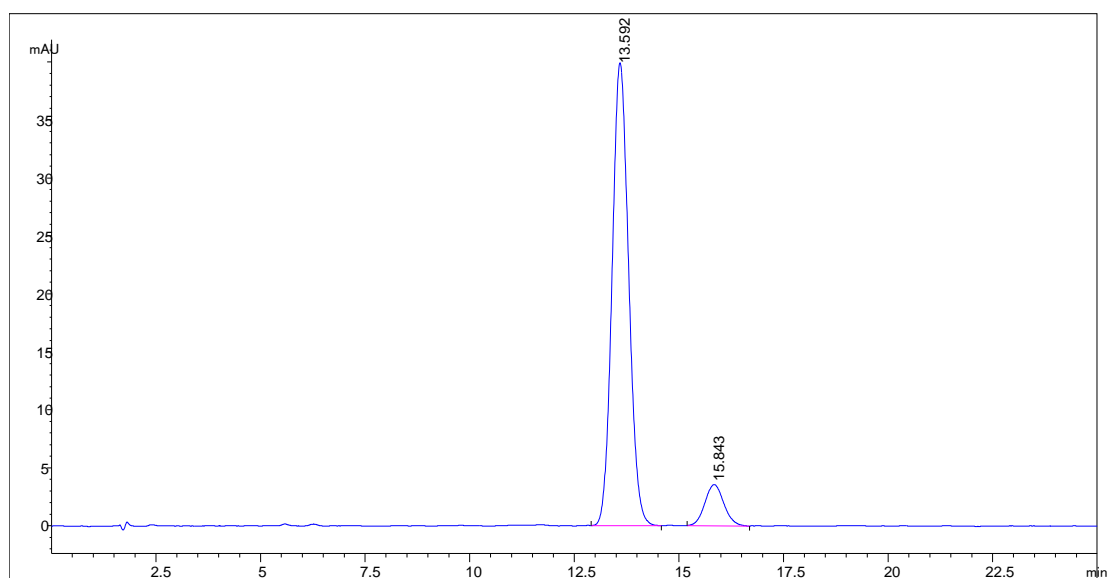

| # | Time (min) | Area (mAU*s) | Height(mAU) | Area % |
|---|------------|--------------|-------------|--------|
| 1 | 13.592     | 1099         | 39.9        | 90.769 |
| 2 | 15.843     | 111.8        | 3.6         | 9.231  |

Fig.S 105 HPLC for pure enantioenriched compound **4ca**

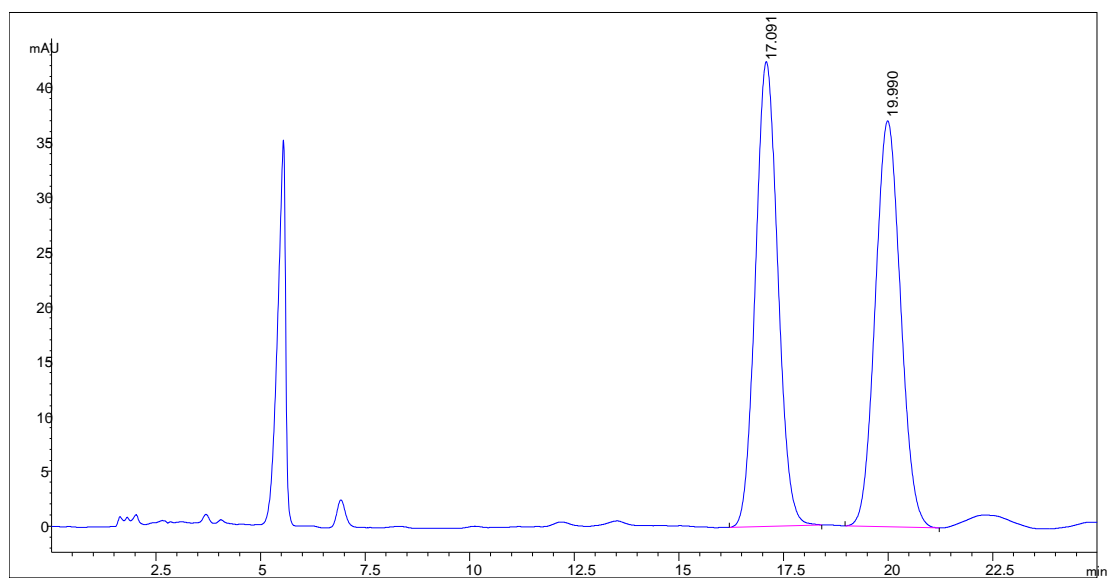

| # | Time (min) | Area (mAU*s) | Height(mAU) | Area % |
|---|------------|--------------|-------------|--------|
| 1 | 17.091     | 1574.2       | 42.4        | 50.281 |
| 2 | 19.99      | 1556.6       | 37          | 49.719 |

Fig.S 106 HPLC for racemic compound **4da**

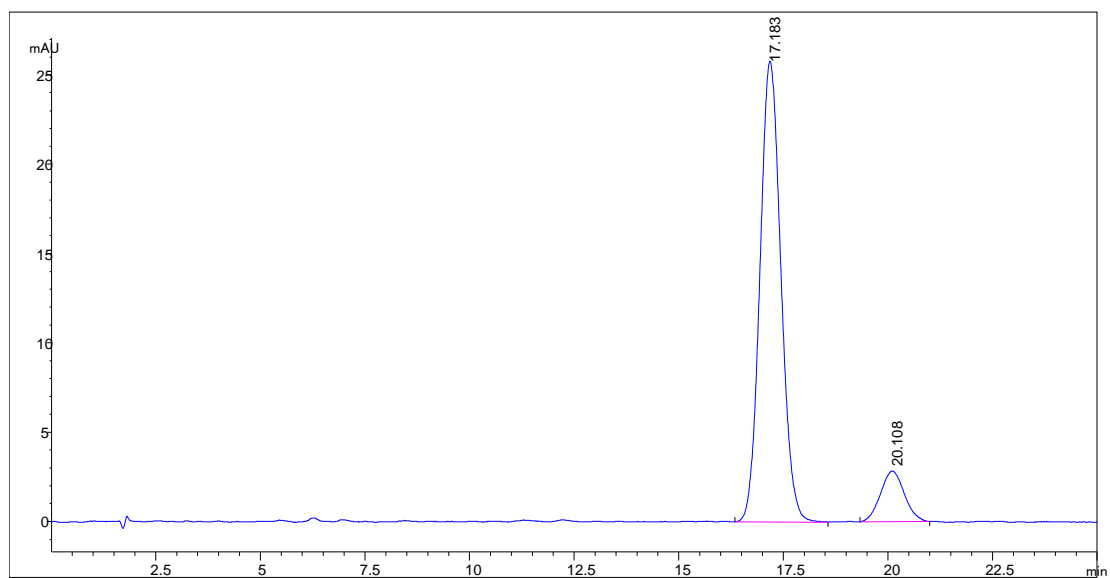

| # | Time (min) | Area (mAU*s) | Height(mAU) | Area % |
|---|------------|--------------|-------------|--------|
| 1 | 17.183     | 896.5        | 25.8        | 88.907 |
| 2 | 20.108     | 111.9        | 2.8         | 11.093 |

Fig.S 107 HPLC for pure enantioenriched compound **4da**

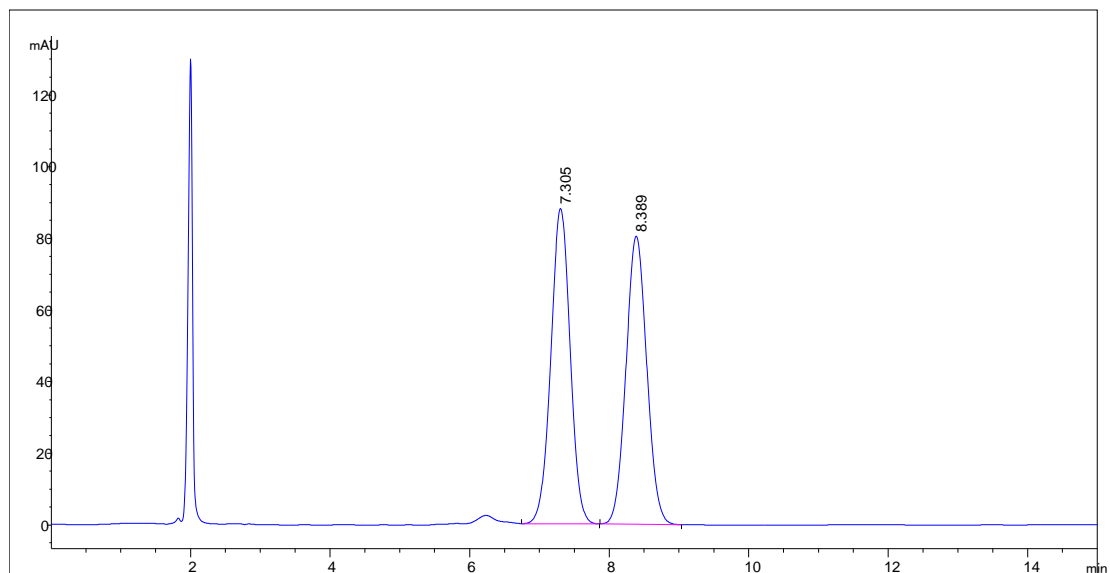

| # | Time (min) | Area (mAU*s) | Height(mAU) | Area % |
|---|------------|--------------|-------------|--------|
| 1 | 7.305      | 1695.2       | 88          | 50.444 |
| 2 | 8.389      | 1665.4       | 80.4        | 49.556 |

Fig.S 108 HPLC for racemic compound **4ea**

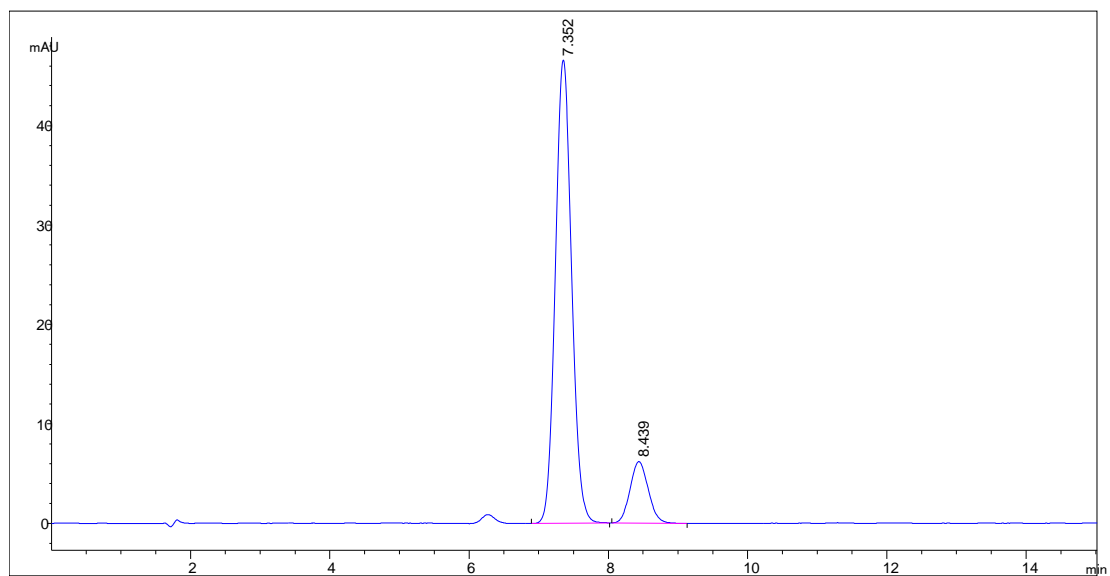

| # | Time (min) | Area (mAU*s) | Height(mAU) | Area % |
|---|------------|--------------|-------------|--------|
| 1 | 7.352      | 756.1        | 46.6        | 87.089 |
| 2 | 8.439      | 112.1        | 6.2         | 12.911 |

Fig.S 109 HPLC for pure enantioenriched compound **4ea**

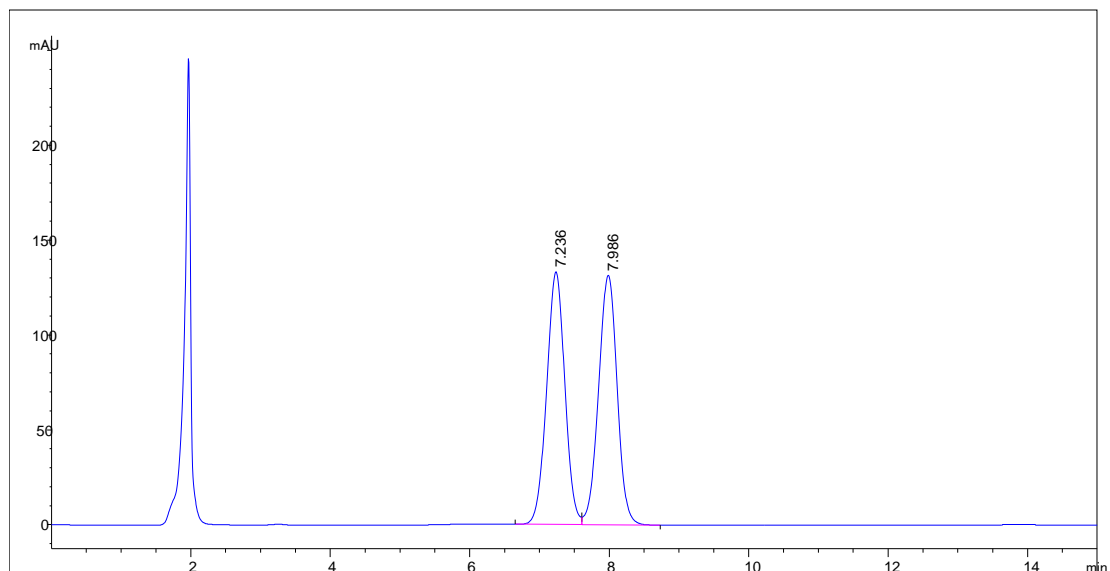

| # | Time (min) | Area (mAU*s) | Height(mAU) | Area % |
|---|------------|--------------|-------------|--------|
| 1 | 7.236      | 2432.4       | 133.3       | 49.994 |
| 2 | 7.986      | 2433         | 131.6       | 50.006 |

Fig.S 110 HPLC for racemic compound **4fa**

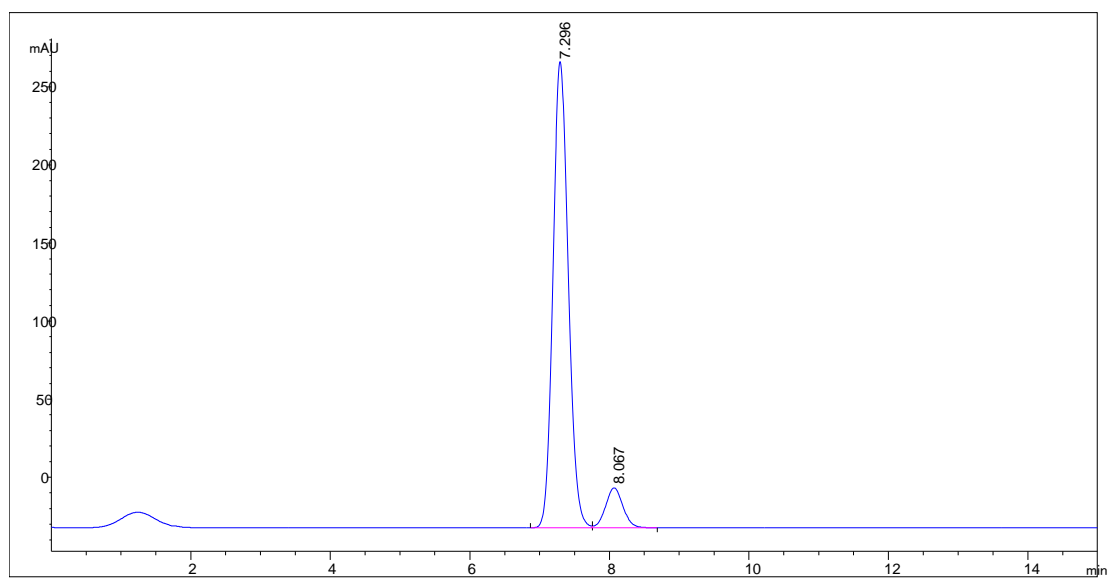

| # | Time (min) | Area (mAU*s) | Height(mAU) | Area % |
|---|------------|--------------|-------------|--------|
| 1 | 7.296      | 4561.7       | 298.4       | 91.267 |
| 2 | 8.067      | 436.5        | 25.4        | 8.733  |

Fig.S 111 HPLC for pure enantioenriched compound **4fa**

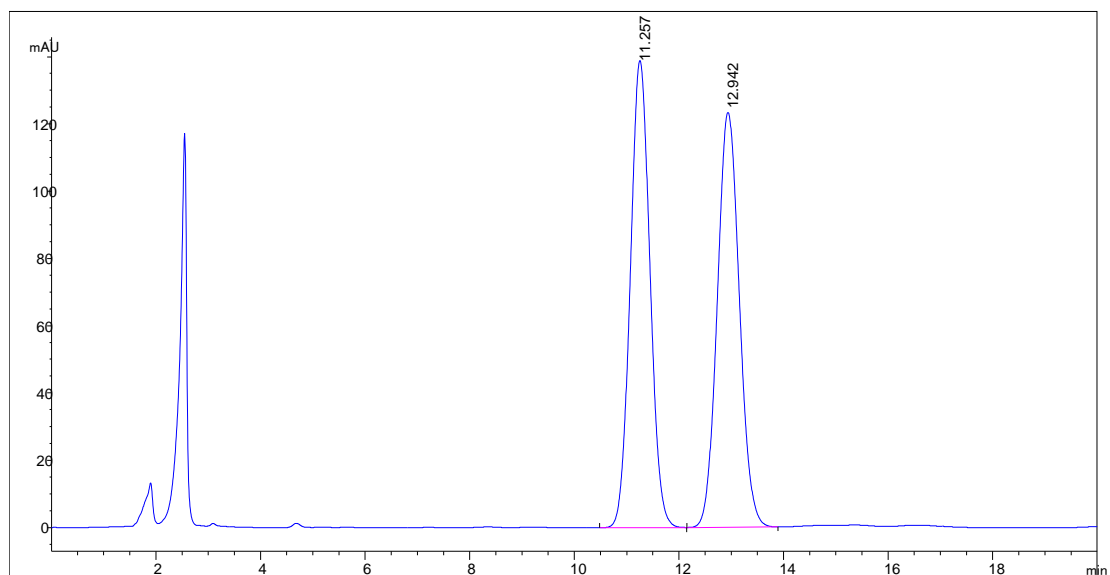

| # | Time (min) | Area (mAU*s) | Height(mAU) | Area % |
|---|------------|--------------|-------------|--------|
| 1 | 11.257     | 3622.5       | 138.9       | 50.066 |
| 2 | 12.942     | 3613.1       | 123.4       | 49.934 |

Fig.S 112 HPLC for racemic compound **4ga**

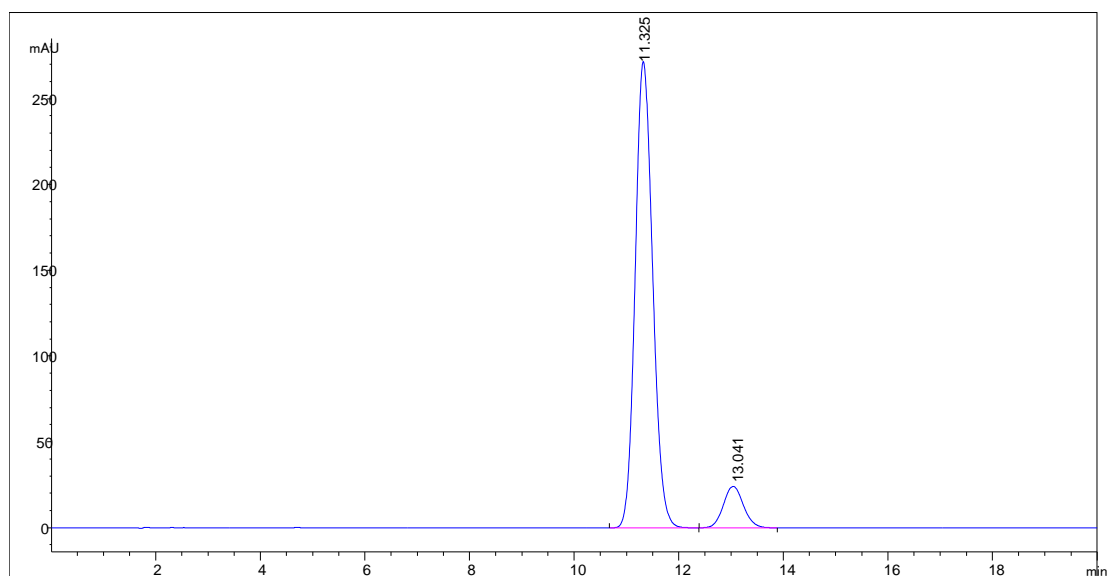

| # | Time (min) | Area (mAU*s) | Height(mAU) | Area % |
|---|------------|--------------|-------------|--------|
| 1 | 11.325     | 6299.5       | 271.7       | 90.754 |
| 2 | 13.041     | 641.8        | 24.1        | 9.246  |

Fig.S 113 HPLC for pure enantioenriched compound **4ga**

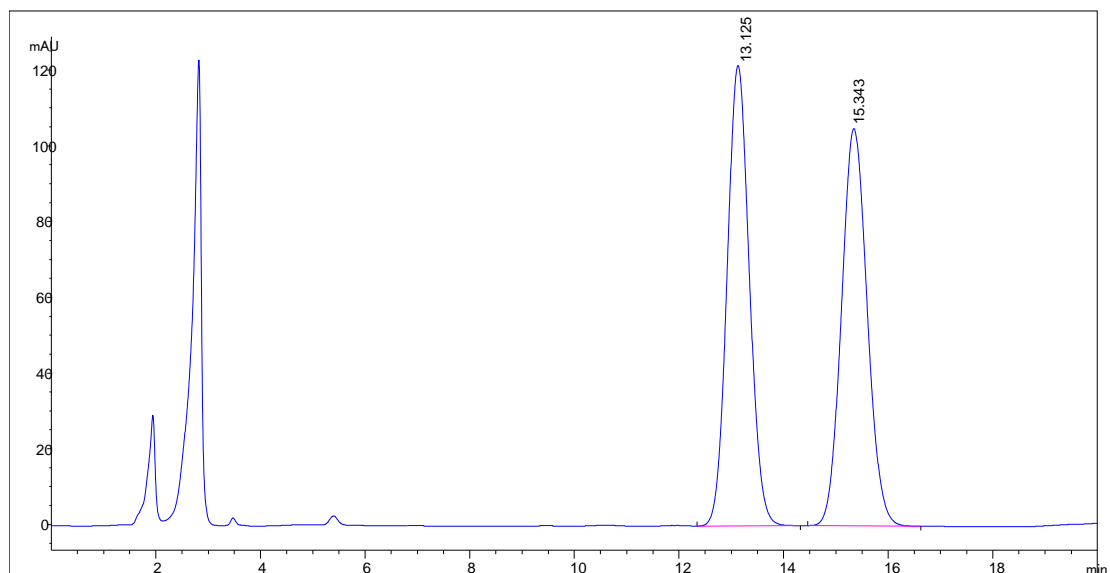

| # | Time (min) | Area (mAU*s) | Height(mAU) | Area % |
|---|------------|--------------|-------------|--------|
| 1 | 13.125     | 3583         | 121.5       | 50.030 |
| 2 | 15.343     | 3578.7       | 104.8       | 49.970 |

Fig.S 114 HPLC for racemic compound **4ha**

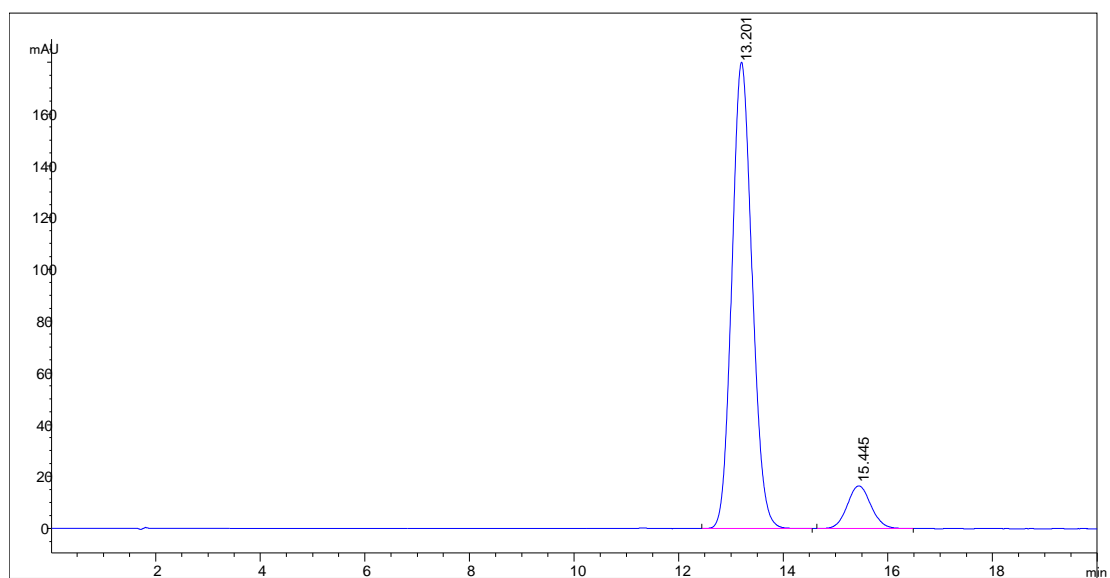

| # | Time (min) | Area (mAU*s) | Height(mAU) | Area % |
|---|------------|--------------|-------------|--------|
| 1 | 13.201     | 4840.6       | 180.1       | 90.347 |
| 2 | 15.445     | 517.2        | 16.4        | 9.653  |

Fig.S 115 HPLC for pure enantioenriched compound **4ha**

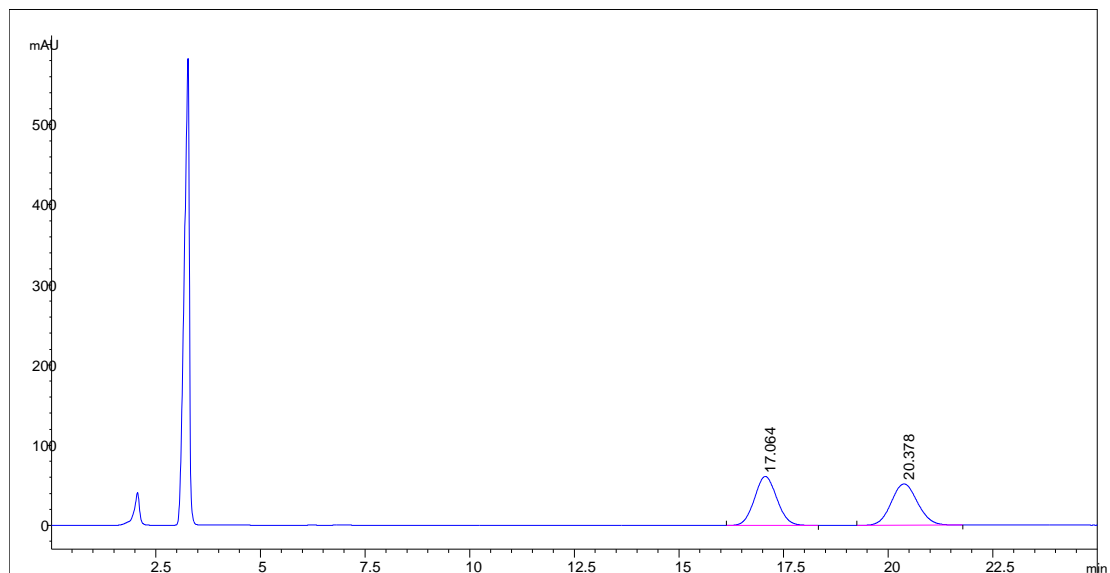

| # | Time (min) | Area (mAU*s) | Height(mAU) | Area % |
|---|------------|--------------|-------------|--------|
| 1 | 17.064     | 2264.4       | 60.9        | 50.079 |
| 2 | 20.378     | 2257.3       | 51.5        | 49.921 |

Fig.S 116 HPLC for racemic compound **4ia**

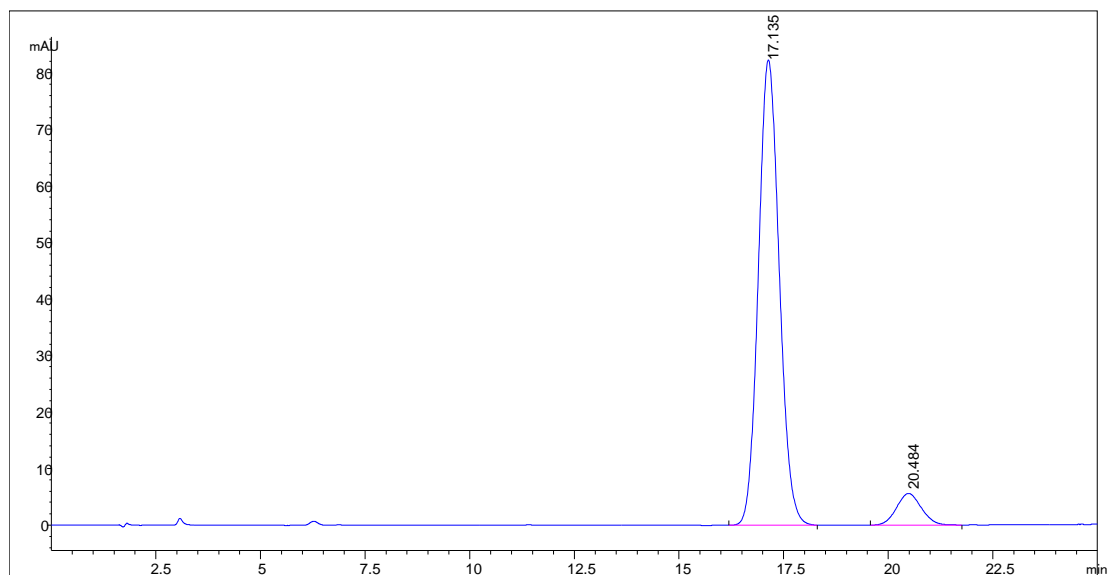

| # | Time (min) | Area (mAU*s) | Height(mAU) | Area % |
|---|------------|--------------|-------------|--------|
| 1 | 17.135     | 2854.6       | 82.3        | 92.523 |
| 2 | 20.484     | 230.7        | 5.6         | 7.477  |

Fig.S 117 HPLC for pure enantioenriched compound **4ia**



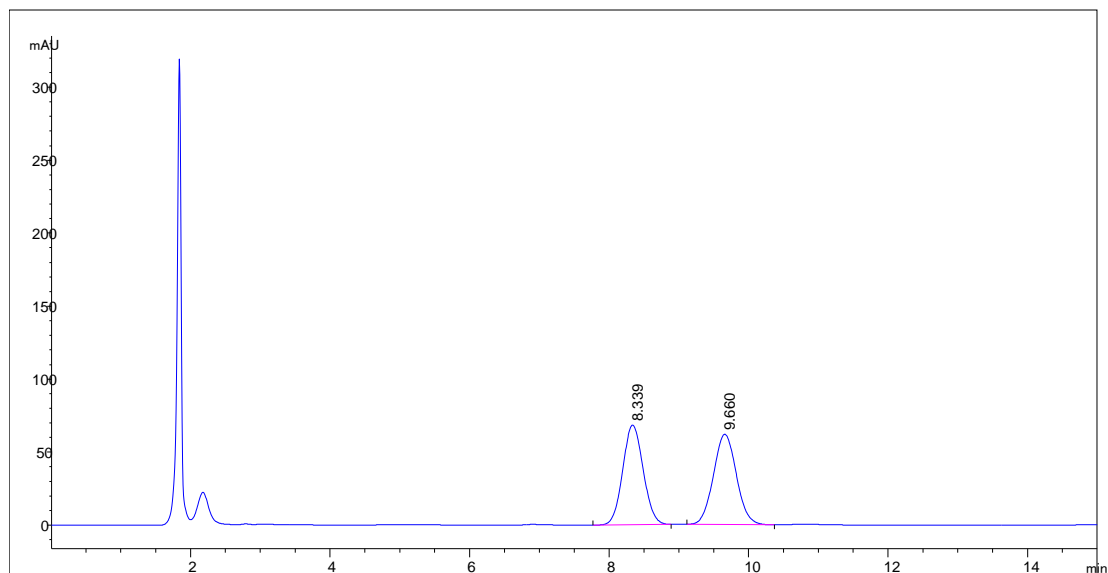

| # | Time (min) | Area (mAU*s) | Height(mAU) | Area % |
|---|------------|--------------|-------------|--------|
| 1 | 8.339      | 1390.9       | 68.2        | 49.724 |
| 2 | 9.66       | 1406.4       | 61.7        | 50.276 |

Fig.S 118 HPLC for racemic compound **4ja**

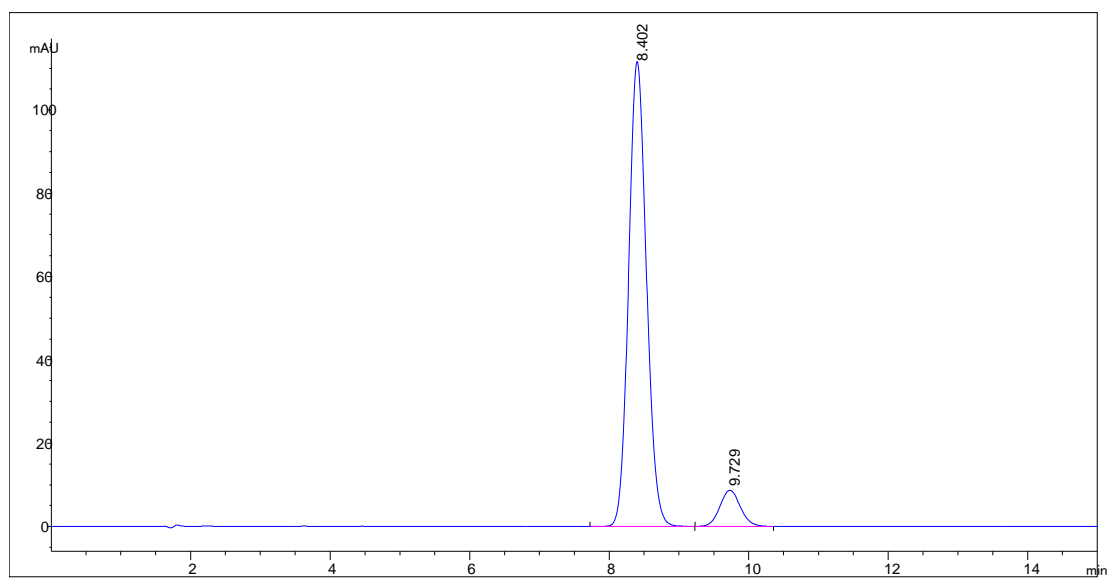

| # | Time (min) | Area (mAU*s) | Height(mAU) | Area % |
|---|------------|--------------|-------------|--------|
| 1 | 8.402      | 1982.1       | 111.6       | 91.858 |
| 2 | 9.729      | 175.7        | 8.6         | 8.142  |

Fig.S 119 HPLC for pure enantioenriched compound **4ja**

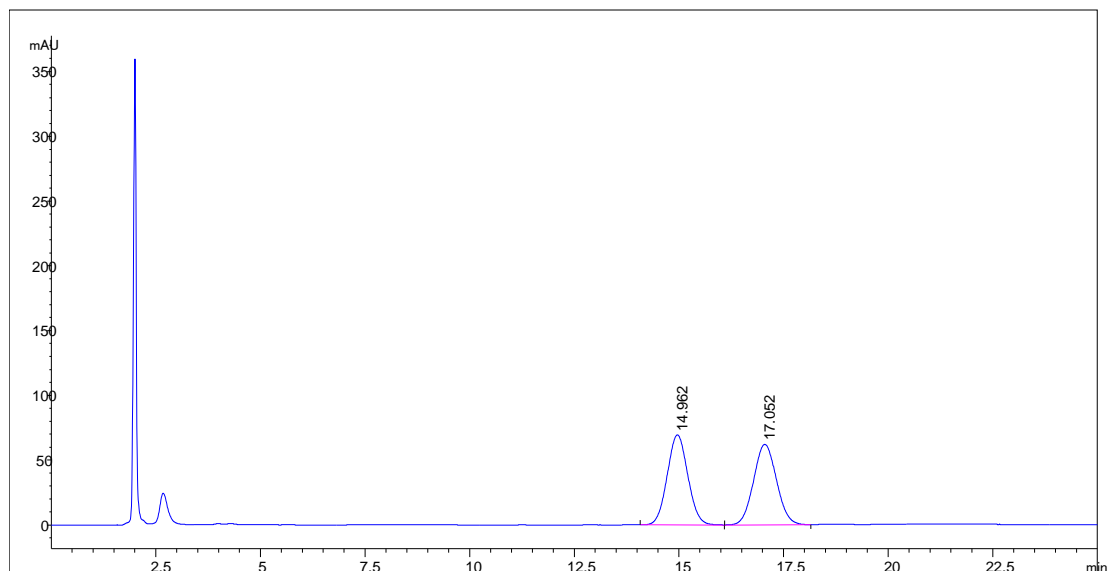

| # | Time (min) | Area (mAU*s) | Height(mAU) | Area % |
|---|------------|--------------|-------------|--------|
| 1 | 14.962     | 2372.4       | 69.3        | 50.106 |
| 2 | 17.052     | 2362.4       | 62          | 49.894 |

Fig.S 120 HPLC for racemic compound **4ka**

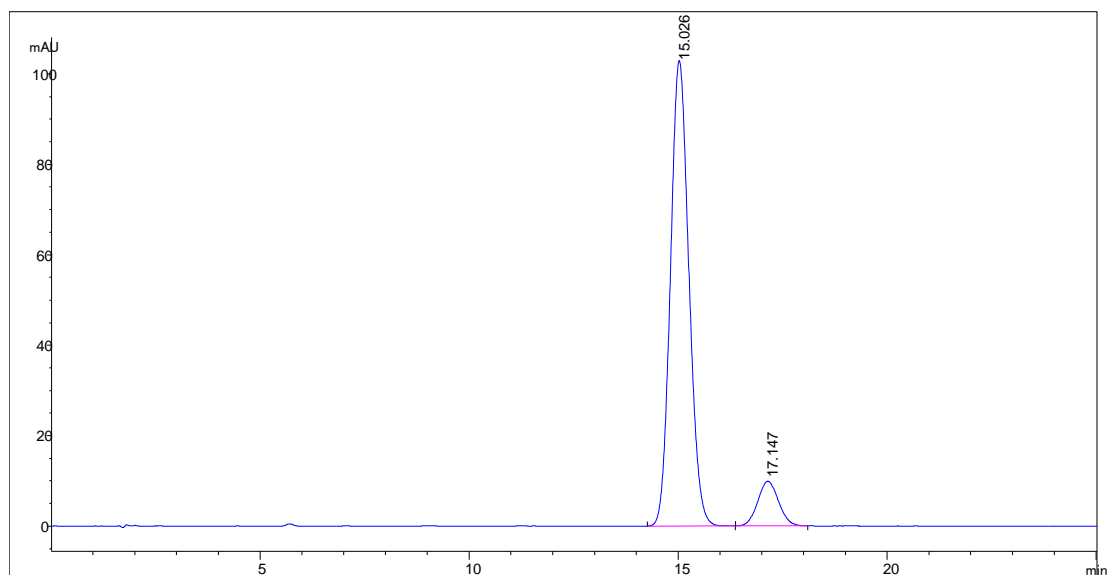

| # | Time (min) | Area (mAU*s) | Height(mAU) | Area % |
|---|------------|--------------|-------------|--------|
| 1 | 15.026     | 3153.1       | 102.9       | 90.235 |
| 2 | 17.147     | 341.2        | 9.9         | 9.765  |

Fig.S 121 HPLC for pure enantioenriched compound **4ka**

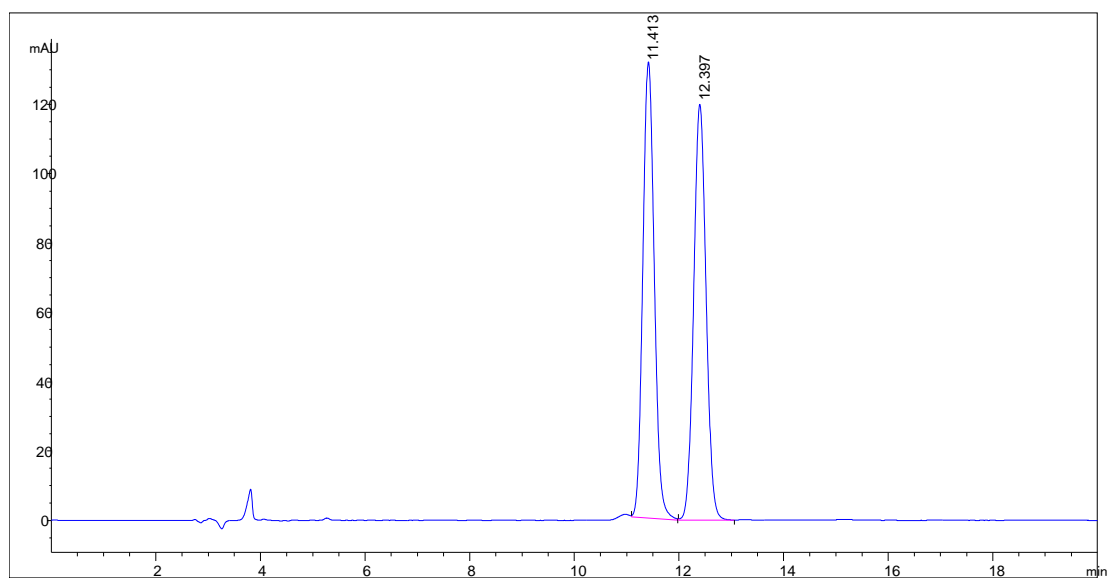

| # | Time (min) | Area (mAU*s) | Height(mAU) | Area % |
|---|------------|--------------|-------------|--------|
| 1 | 11.413     | 1990         | 131.6       | 50.107 |
| 2 | 12.397     | 1981.5       | 120         | 49.893 |

Fig.S 122 HPLC for racemic compound **4la**

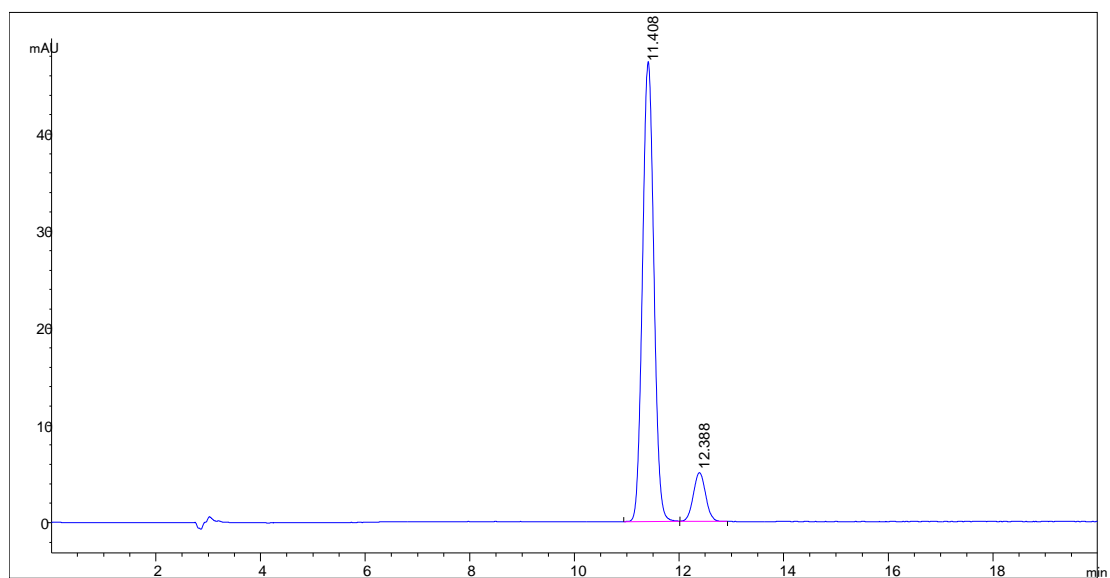

| # | Time (min) | Area (mAU*s) | Height(mAU) | Area % |
|---|------------|--------------|-------------|--------|
| 1 | 11.408     | 708.8        | 47.3        | 89.665 |
| 2 | 12.388     | 81.7         | 5           | 10.335 |

Fig.S 123 HPLC for pure enantioenriched compound **4la**

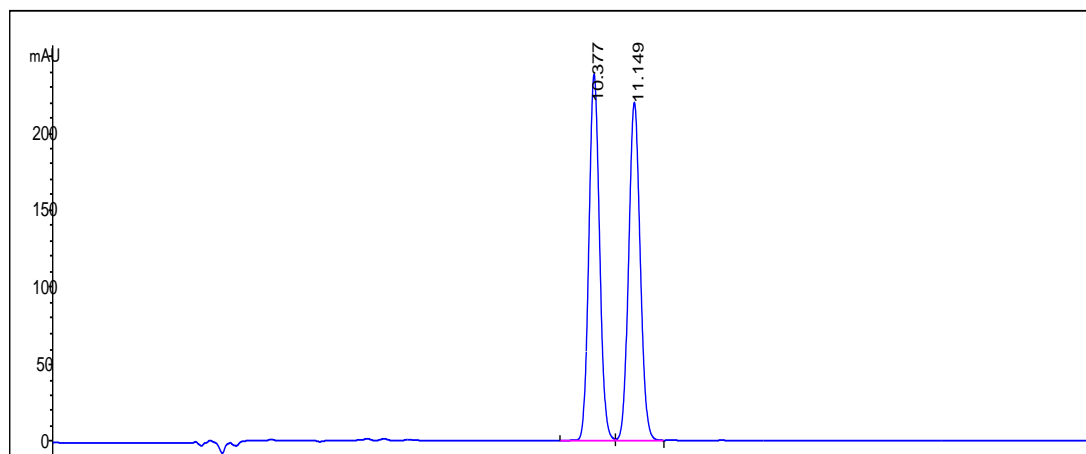

| # | Time (min) | Area (mAU*s) | Height(mAU) | Area % |
|---|------------|--------------|-------------|--------|
| 1 | 10.377     | 3389.7       | 237.6       | 50.001 |
| 2 | 11.149     | 3389.6       | 219.3       | 49.999 |

Fig.S 124 HPLC for racemic compound **4ma**

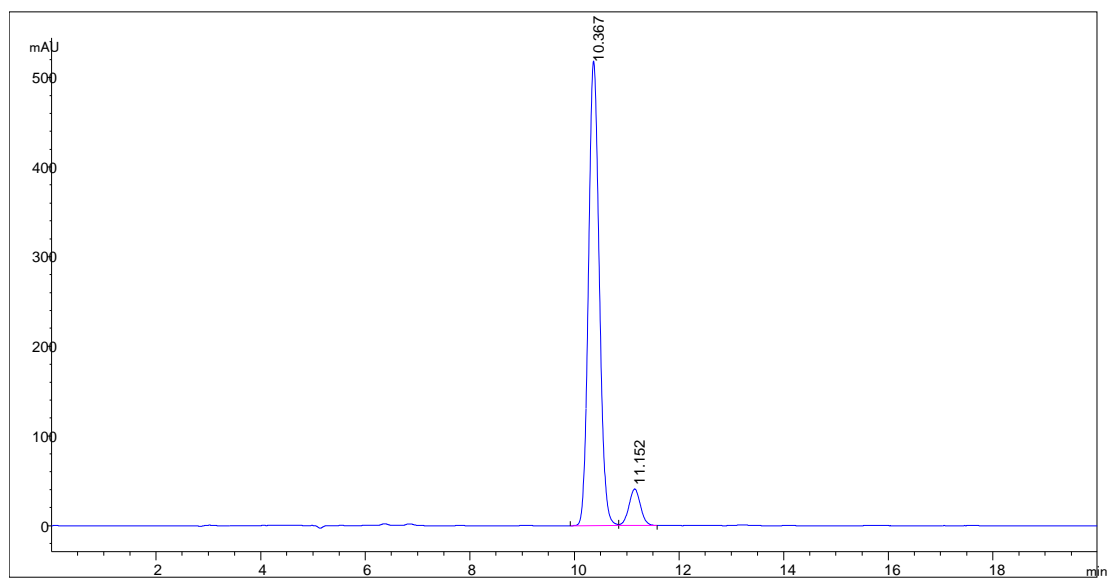

| # | Time (min) | Area (mAU*s) | Height(mAU) | Area % |
|---|------------|--------------|-------------|--------|
| 1 | 10.367     | 7422.1       | 518.4       | 92.253 |
| 2 | 11.152     | 623.3        | 40.6        | 7.747  |

Fig.S 125 HPLC for pure enantioenriched compound **4ma**

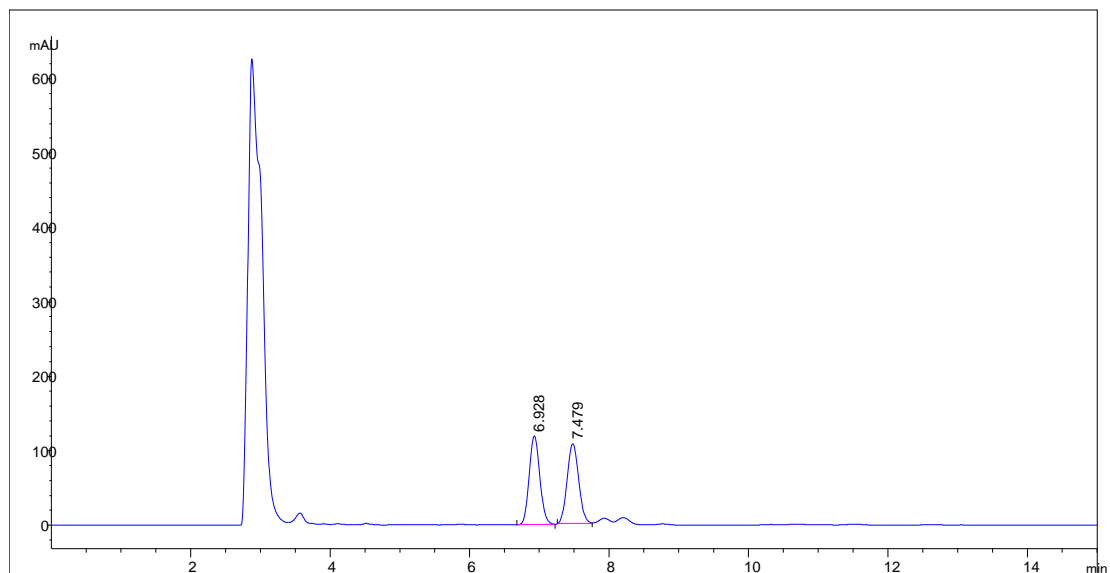

| # | Time (min) | Area (mAU*s) | Height(mAU) | Area % |
|---|------------|--------------|-------------|--------|
| 1 | 6.928      | 1255.6       | 119.1       | 50.628 |
| 2 | 7.479      | 1224.4       | 107.2       | 49.372 |

Fig.S 126 HPLC for racemic compound **4na**

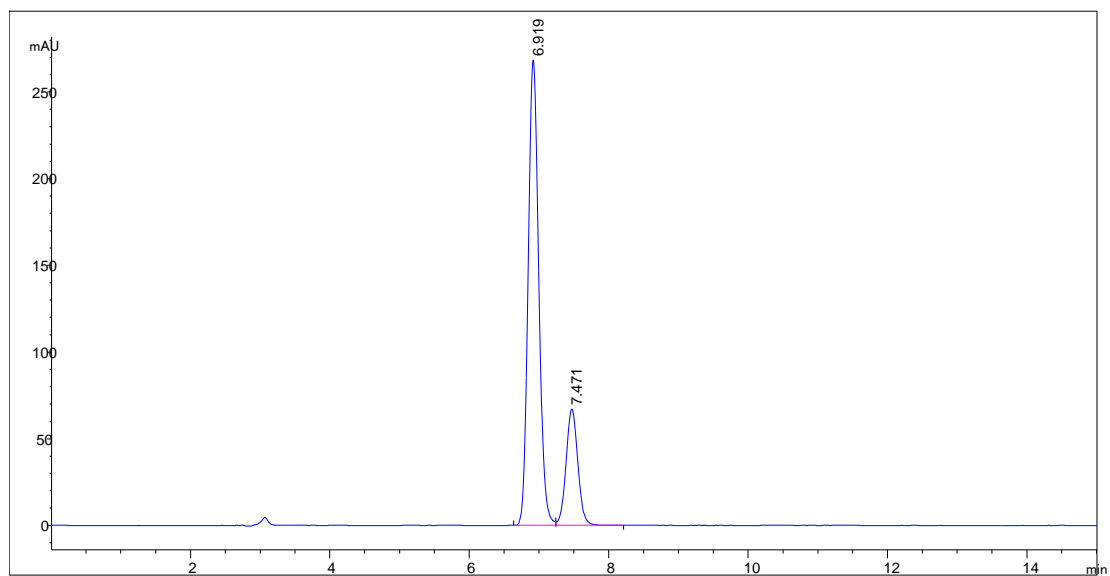

| # | Time (min) | Area (mAU*s) | Height(mAU) | Area % |
|---|------------|--------------|-------------|--------|
| 1 | 6.919      | 2826.7       | 268.4       | 78.154 |
| 2 | 7.471      | 790.1        | 67          | 21.846 |

Fig.S 127 HPLC for pure enantioenriched compound **4na**

## 5. HPLC of 1,2-dihydroisoquinoline-1-ylphenylphosphine oxides **6**

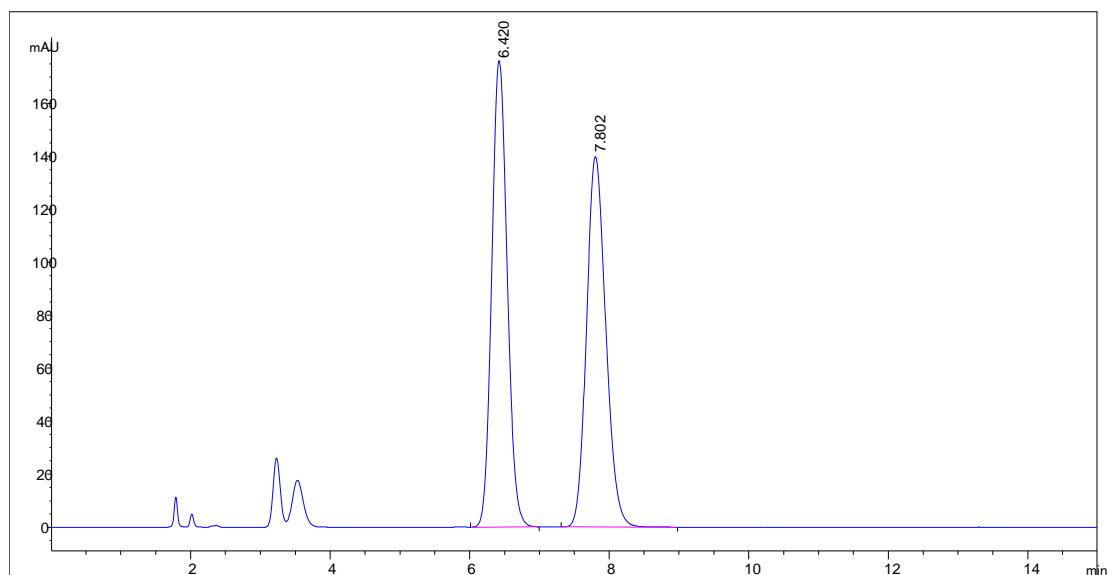

| # | Time (min) | Area (mAU*s) | Height(mAU) | Area % |
|---|------------|--------------|-------------|--------|
| 1 | 6.42       | 2689.7       | 176.1       | 49.981 |
| 2 | 7.802      | 2691.7       | 139.9       | 50.019 |

Fig.S 128 HPLC for racemic compound **6a**

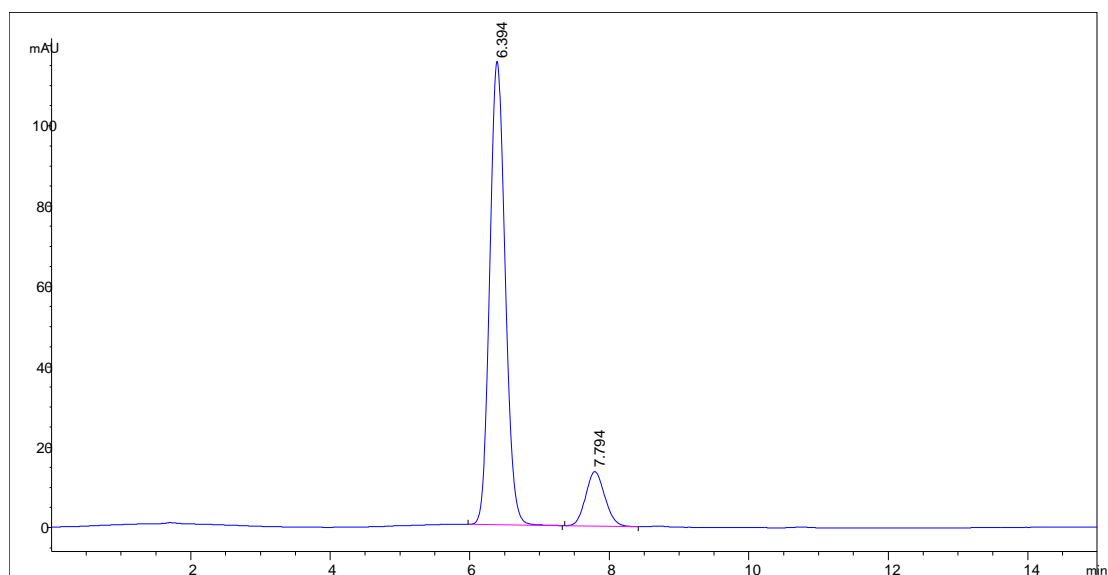

| # | Time (min) | Area (mAU*s) | Height(mAU) | Area % |
|---|------------|--------------|-------------|--------|
| 1 | 6.394      | 1765.5       | 115.3       | 87.176 |
| 2 | 7.794      | 259.7        | 13.5        | 12.824 |

Fig.S 129 HPLC for pure enantioenriched compound **6a**

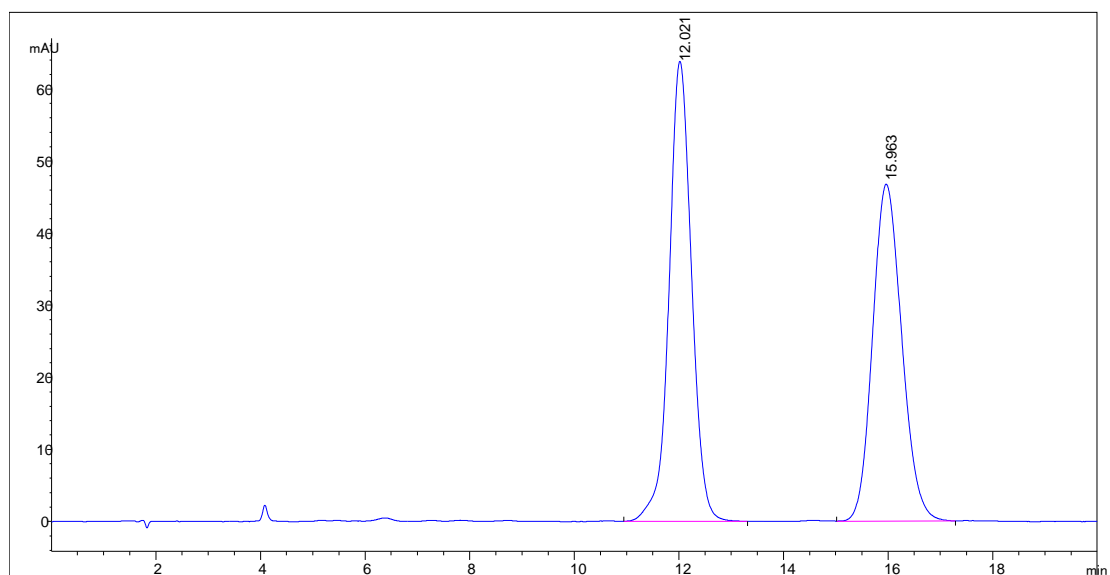

| # | Time (min) | Area (mAU*s) | Height(mAU) | Area % |
|---|------------|--------------|-------------|--------|
| 1 | 12.021     | 1908.3       | 63.8        | 51.378 |
| 2 | 15.963     | 1805.9       | 46.7        | 48.622 |

Fig.S 130 HPLC for racemic compound **6b**

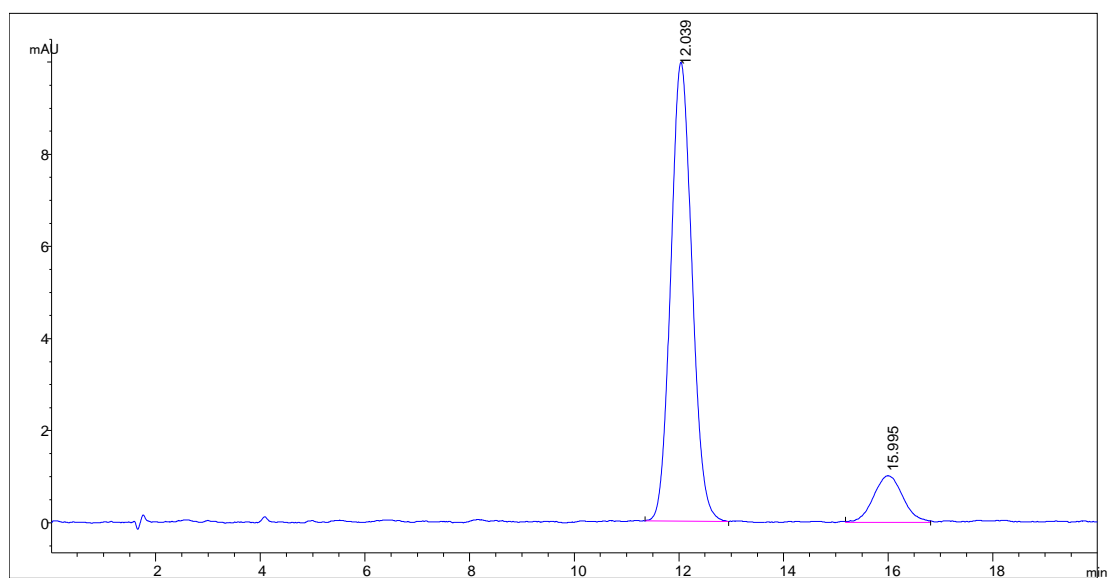

| # | Time (min) | Area (mAU*s) | Height(mAU) | Area % |
|---|------------|--------------|-------------|--------|
| 1 | 12.039     | 281          | 10          | 87.711 |
| 2 | 15.995     | 39.4         | 1           | 12.289 |

Fig.S 131 HPLC for pure enantioenriched compound **6b**

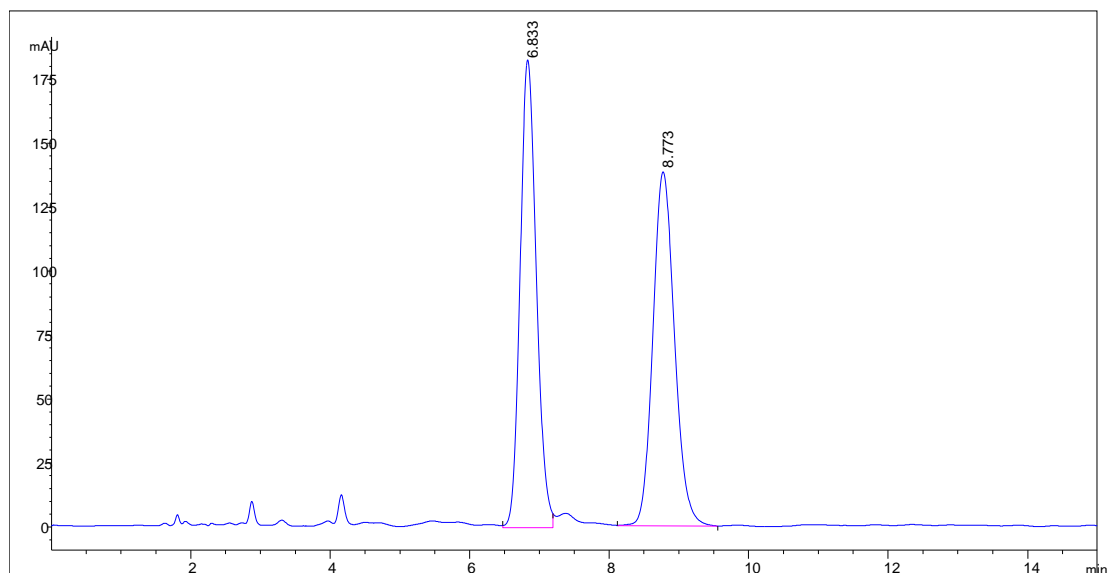

| # | Time (min) | Area (mAU*s) | Height(mAU) | Area % |
|---|------------|--------------|-------------|--------|
| 1 | 6.833      | 2978.1       | 183.1       | 50.030 |
| 2 | 8.773      | 2974.6       | 138.3       | 49.970 |

Fig.S 132 HPLC for racemic compound **6c**

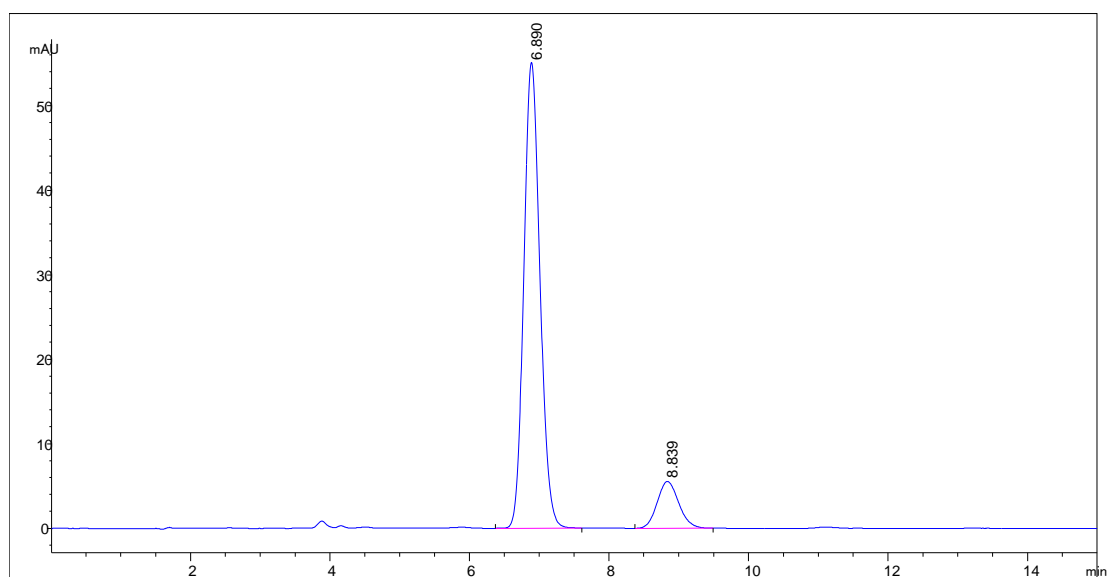

| # | Time (min) | Area (mAU*s) | Height(mAU) | Area % |
|---|------------|--------------|-------------|--------|
| 1 | 6.89       | 884          | 55.1        | 88.143 |
| 2 | 8.839      | 118.9        | 5.5         | 11.857 |

Fig.S 133 HPLC for pure enantioenriched compound **6c**



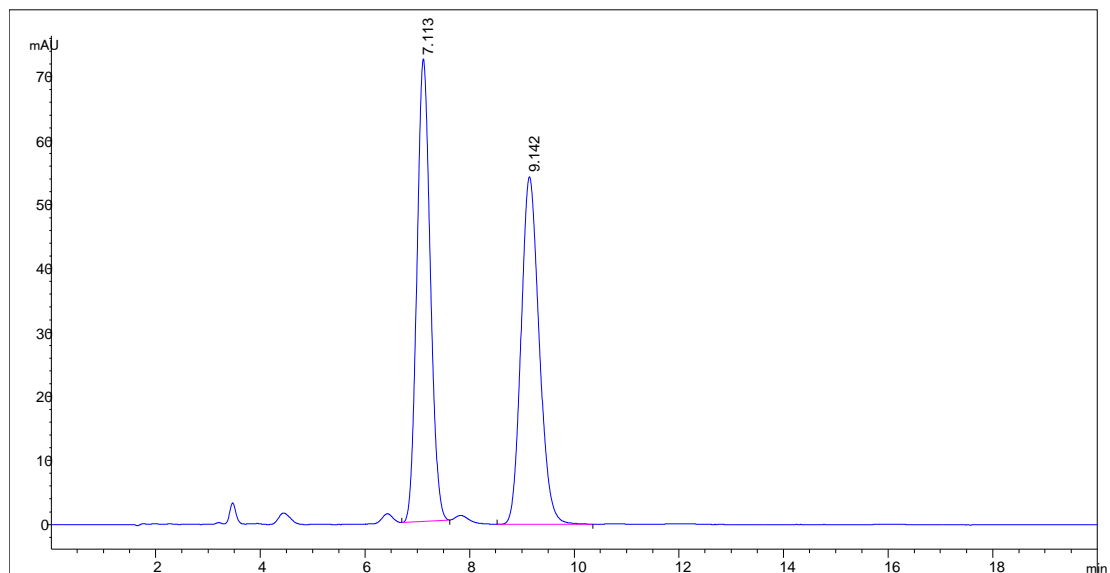

| # | Time (min) | Area (mAU*s) | Height(mAU) | Area % |
|---|------------|--------------|-------------|--------|
| 1 | 7.113      | 1288.1       | 72.3        | 49.696 |
| 2 | 9.142      | 1303.8       | 54.3        | 50.304 |

Fig.S 134 HPLC for racemic compound **6d**

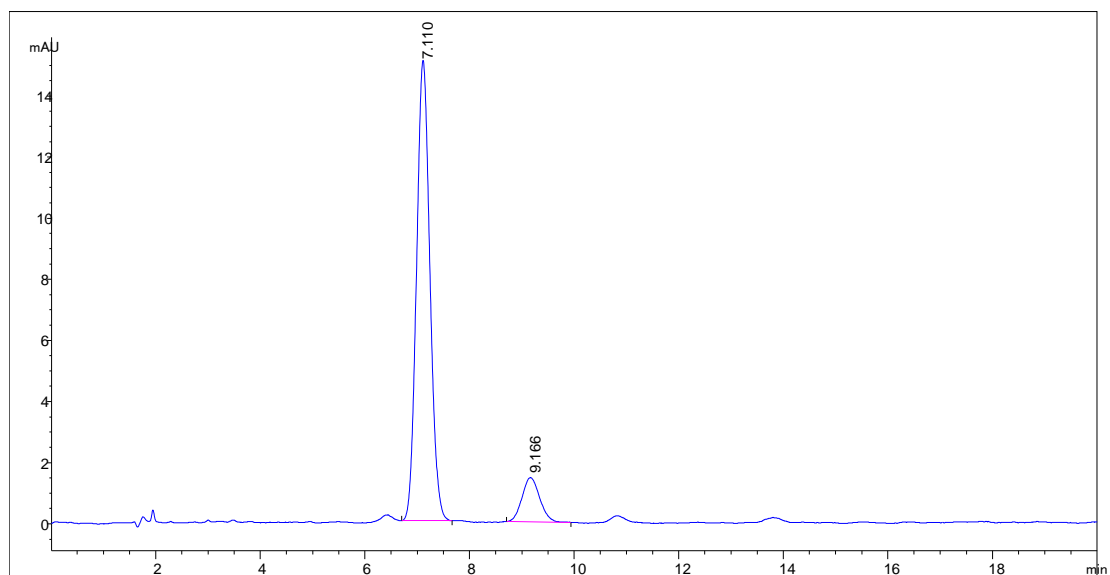

| # | Time (min) | Area (mAU*s) | Height(mAU) | Area % |
|---|------------|--------------|-------------|--------|
| 1 | 7.11       | 268.1        | 15.1        | 88.724 |
| 2 | 9.166      | 34.1         | 1.4         | 11.276 |

Fig.S 135 HPLC for pure enantioenriched compound **6d**

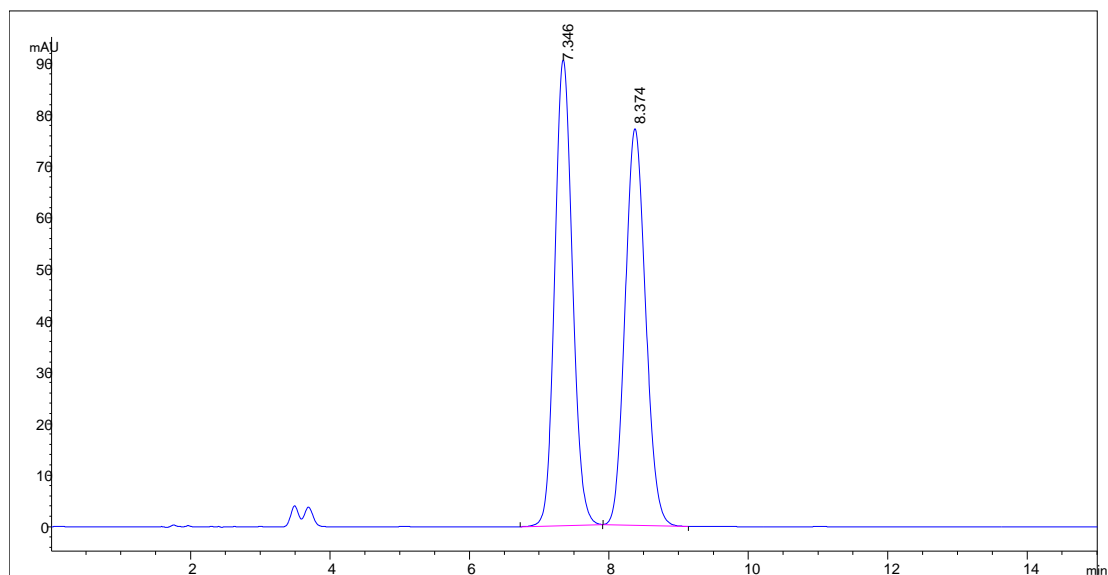

| # | Time (min) | Area (mAU*s) | Height(mAU) | Area % |
|---|------------|--------------|-------------|--------|
| 1 | 7.346      | 1587.1       | 90.4        | 50.311 |
| 2 | 8.374      | 1567.4       | 77          | 49.689 |

Fig.S 136 HPLC for racemic compound **6e**

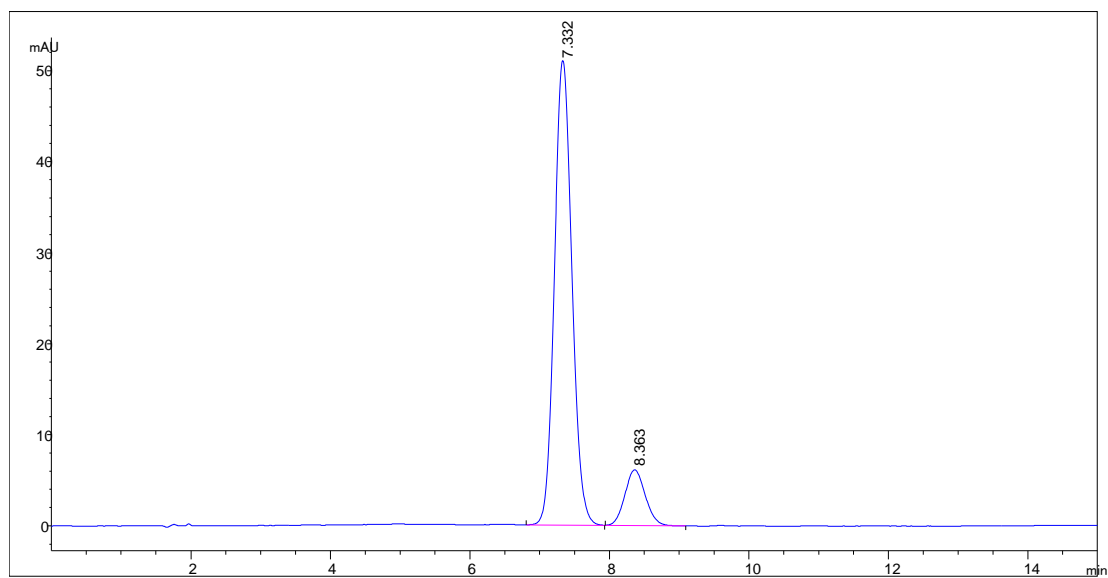

| # | Time (min) | Area (mAU*s) | Height(mAU) | Area % |
|---|------------|--------------|-------------|--------|
| 1 | 7.332      | 888.3        | 51          | 87.752 |
| 2 | 8.363      | 124          | 6.1         | 12.248 |

Fig.S 137 HPLC for pure enantioenriched compound **6e**

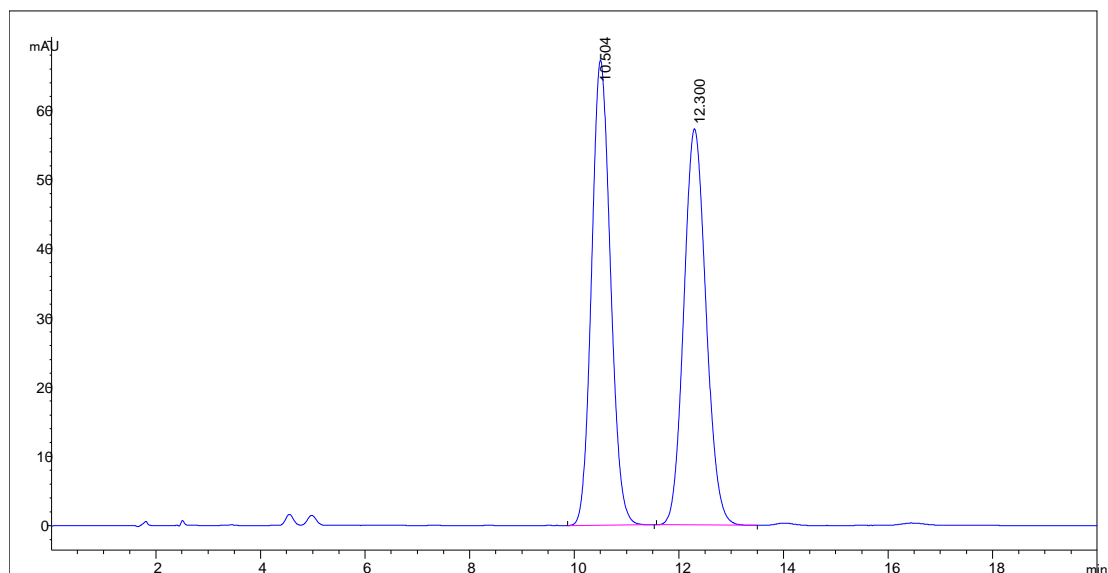

| # | Time (min) | Area (mAU*s) | Height(mAU) | Area % |
|---|------------|--------------|-------------|--------|
| 1 | 10.504     | 1684.3       | 67.2        | 49.921 |
| 2 | 12.3       | 1689.7       | 57.2        | 50.079 |

Fig.S 138 HPLC for racemic compound **6f**

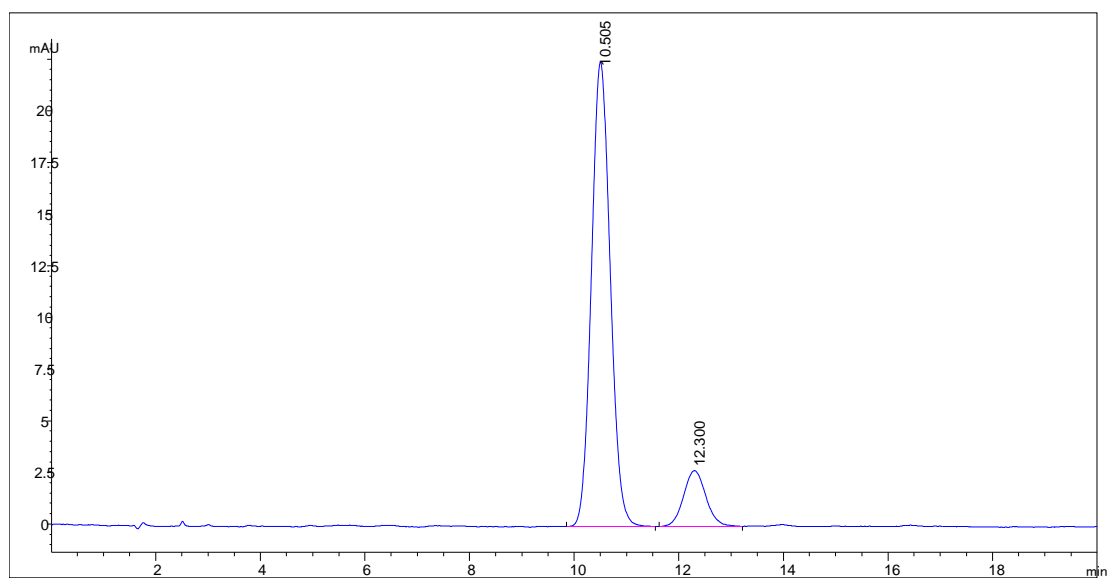

| # | Time (min) | Area (mAU*s) | Height(mAU) | Area % |
|---|------------|--------------|-------------|--------|
| 1 | 10.505     | 561.9        | 22.5        | 87.559 |
| 2 | 12.3       | 79.8         | 2.7         | 12.441 |

Fig.S 139 HPLC for pure enantioenriched compound **6f**

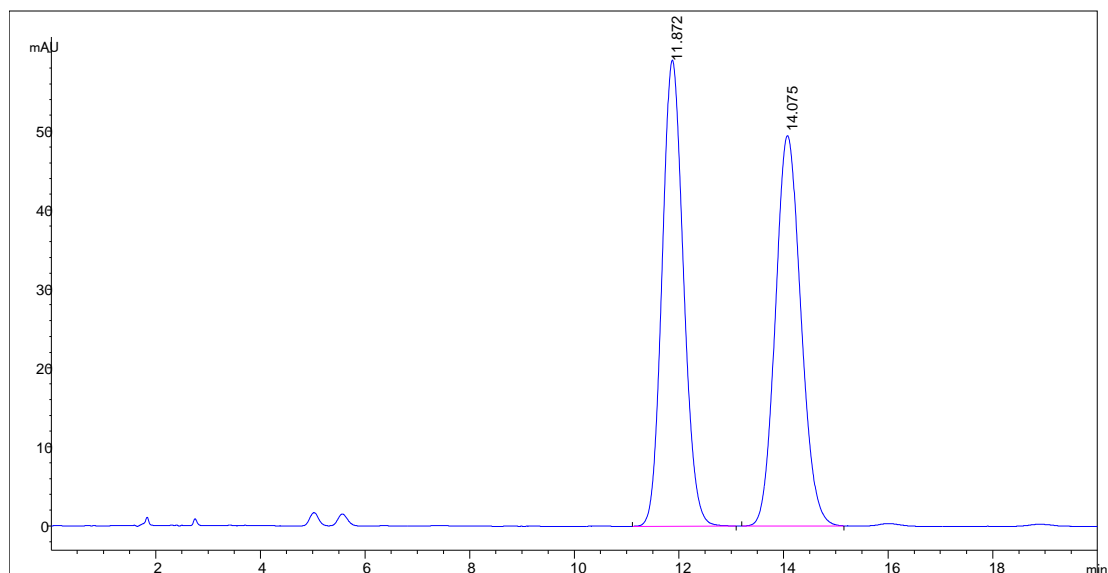

| # | Time (min) | Area (mAU*s) | Height(mAU) | Area % |
|---|------------|--------------|-------------|--------|
| 1 | 11.872     | 1676.8       | 59          | 50.050 |
| 2 | 14.075     | 1673.4       | 49.5        | 49.950 |

Fig.S 140 HPLC for racemic compound **6g**

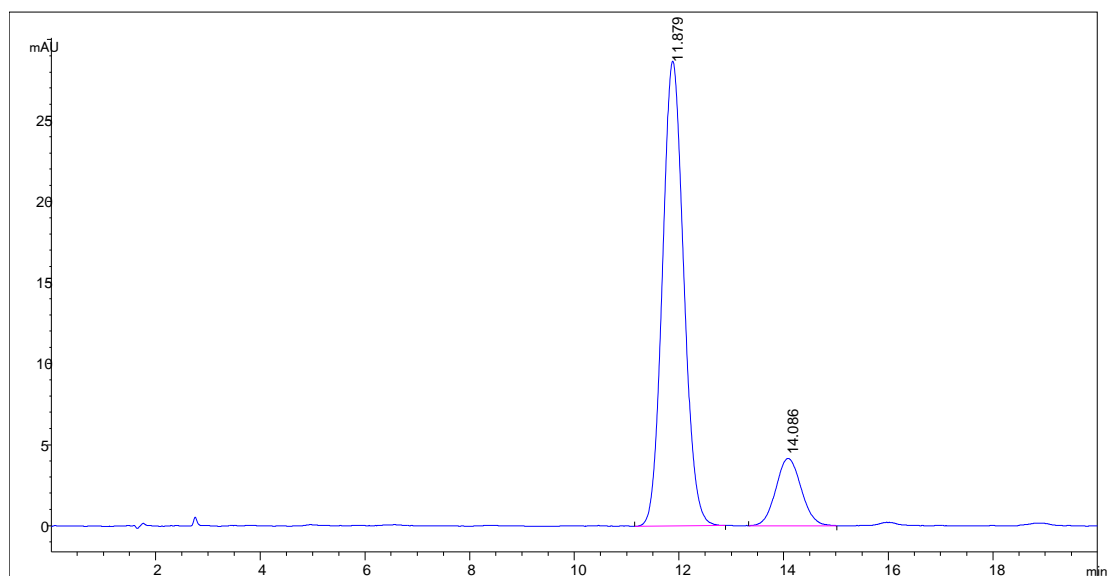

| # | Time (min) | Area (mAU*s) | Height(mAU) | Area % |
|---|------------|--------------|-------------|--------|
| 1 | 11.879     | 809.2        | 28.7        | 85.288 |
| 2 | 14.086     | 139.6        | 4.2         | 14.712 |

Fig.S 141 HPLC for pure enantioenriched compound **6g**

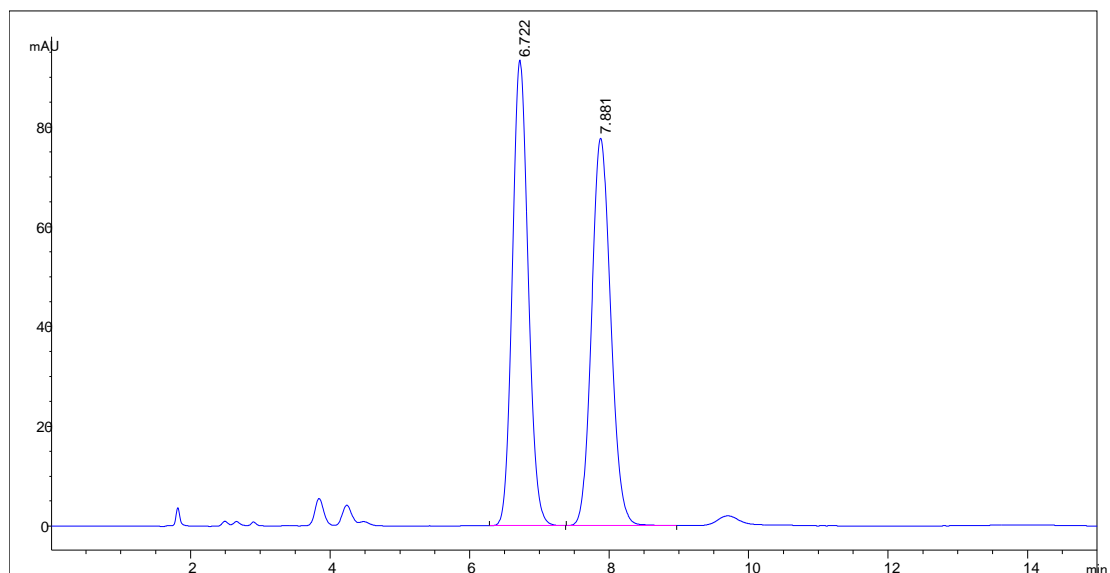

| # | Time (min) | Area (mAU*s) | Height(mAU) | Area % |
|---|------------|--------------|-------------|--------|
| 1 | 6.722      | 1479.5       | 93.4        | 49.997 |
| 2 | 7.881      | 1479.7       | 77.7        | 50.003 |

Fig.S 142 HPLC for racemic compound **6h**

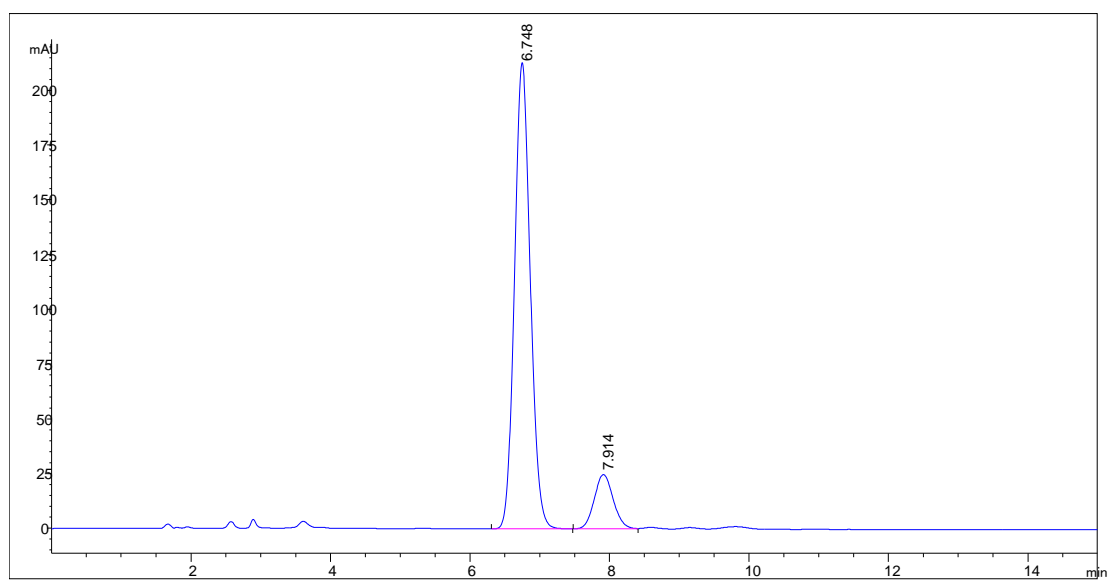

| # | Time (min) | Area (mAU*s) | Height(mAU) | Area % |
|---|------------|--------------|-------------|--------|
| 1 | 6.748      | 3365         | 212.9       | 87.894 |
| 2 | 7.914      | 463.5        | 24.7        | 12.106 |

Fig.S 143 HPLC for pure enantioenriched compound **6h**

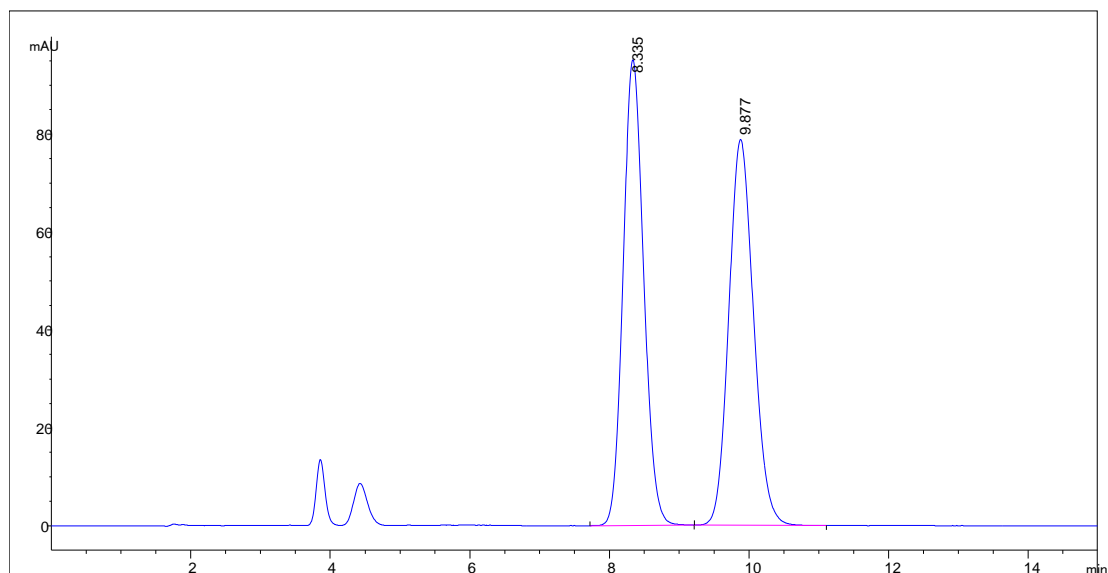

| # | Time (min) | Area (mAU*s) | Height(mAU) | Area % |
|---|------------|--------------|-------------|--------|
| 1 | 8.335      | 1946.3       | 95.1        | 50.041 |
| 2 | 9.877      | 1943.2       | 78.8        | 49.959 |

Fig.S 144 HPLC for racemic compound **6i**

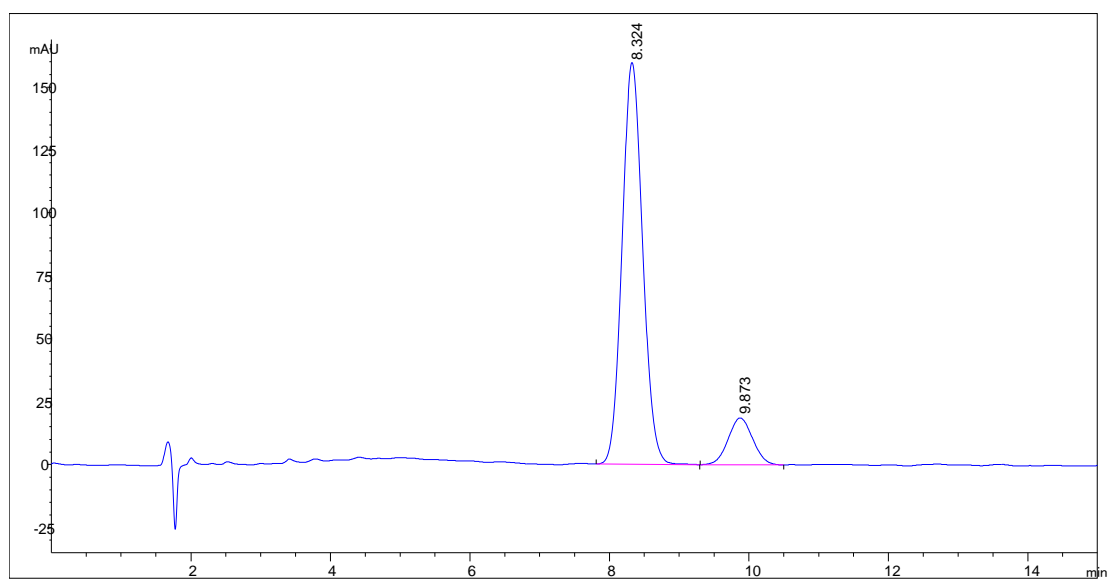

| # | Time (min) | Area (mAU*s) | Height(mAU) | Area % |
|---|------------|--------------|-------------|--------|
| 1 | 8.324      | 3277.4       | 159.6       | 87.729 |
| 2 | 9.873      | 458.4        | 18.7        | 12.271 |

Fig.S 145 HPLC for pure enantioenriched compound **6i**

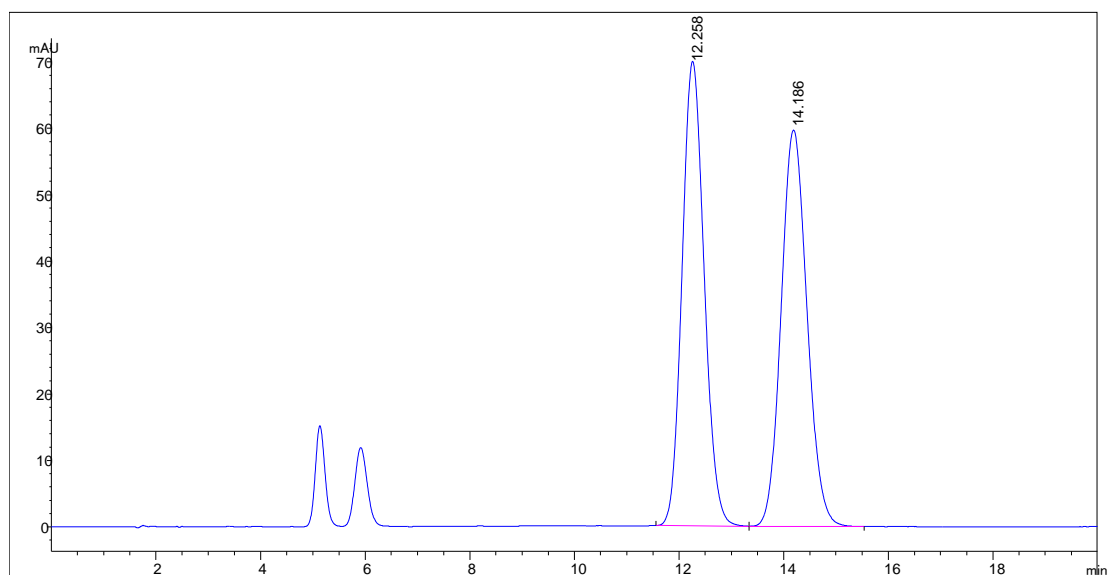

| # | Time (min) | Area (mAU*s) | Height(mAU) | Area % |
|---|------------|--------------|-------------|--------|
| 1 | 12.258     | 2047.1       | 70          | 49.992 |
| 2 | 14.186     | 2047.7       | 59.7        | 50.008 |

Fig.S 146 HPLC for racemic compound **6j**

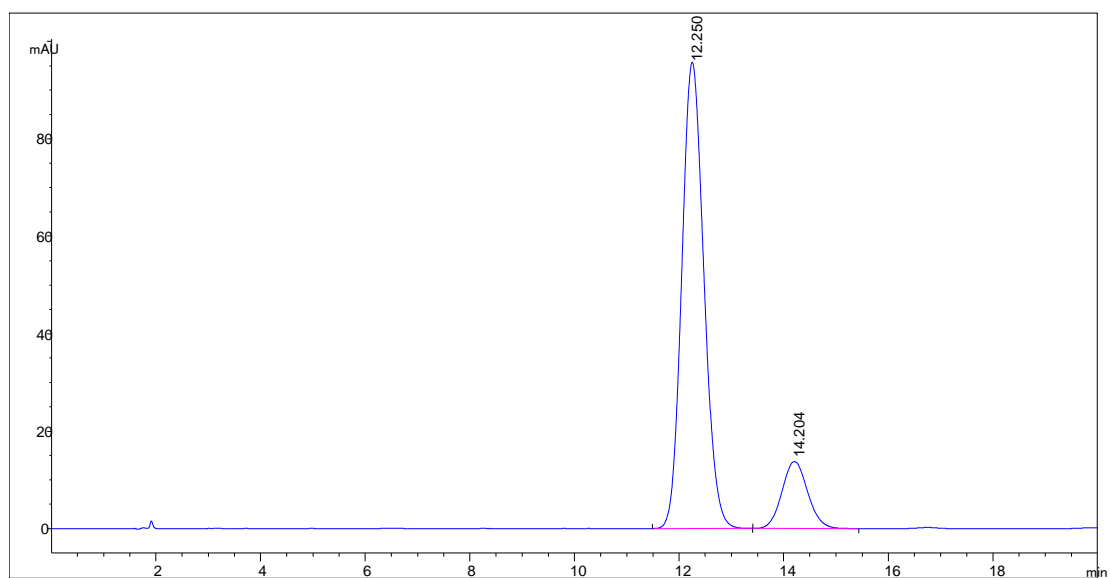

| # | Time (min) | Area (mAU*s) | Height(mAU) | Area % |
|---|------------|--------------|-------------|--------|
| 1 | 12.25      | 2803.7       | 95.7        | 85.620 |
| 2 | 14.204     | 470.9        | 13.8        | 14.380 |

Fig.S 147 HPLC for pure enantioenriched compound **6j**

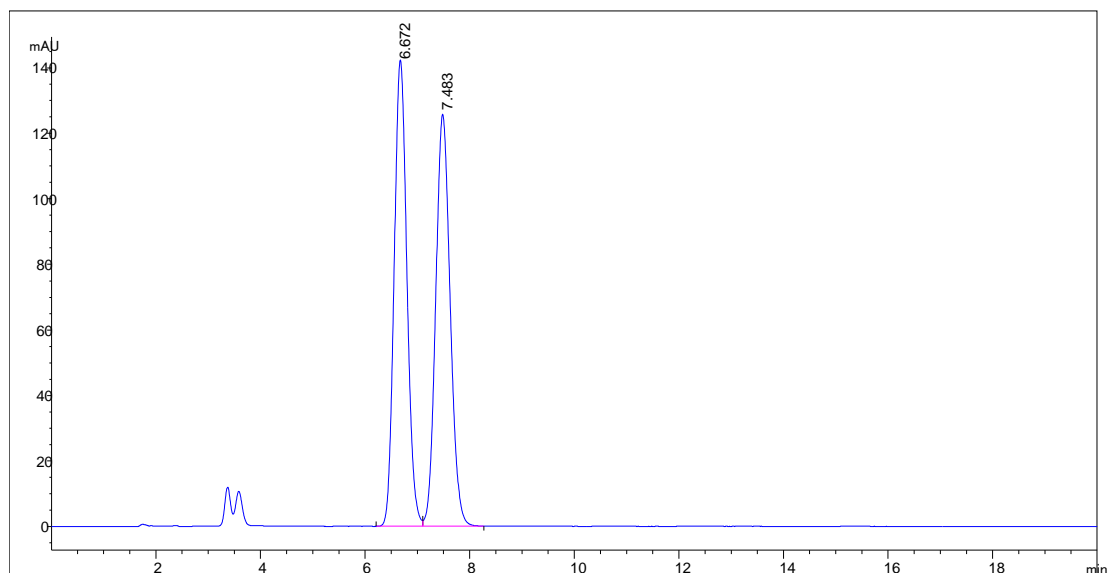

| # | Time (min) | Area (mAU*s) | Height(mAU) | Area % |
|---|------------|--------------|-------------|--------|
| 1 | 6.672      | 2408.6       | 142.4       | 49.893 |
| 2 | 7.483      | 2419         | 125.8       | 50.107 |

Fig.S 148 HPLC for racemic compound **6k**

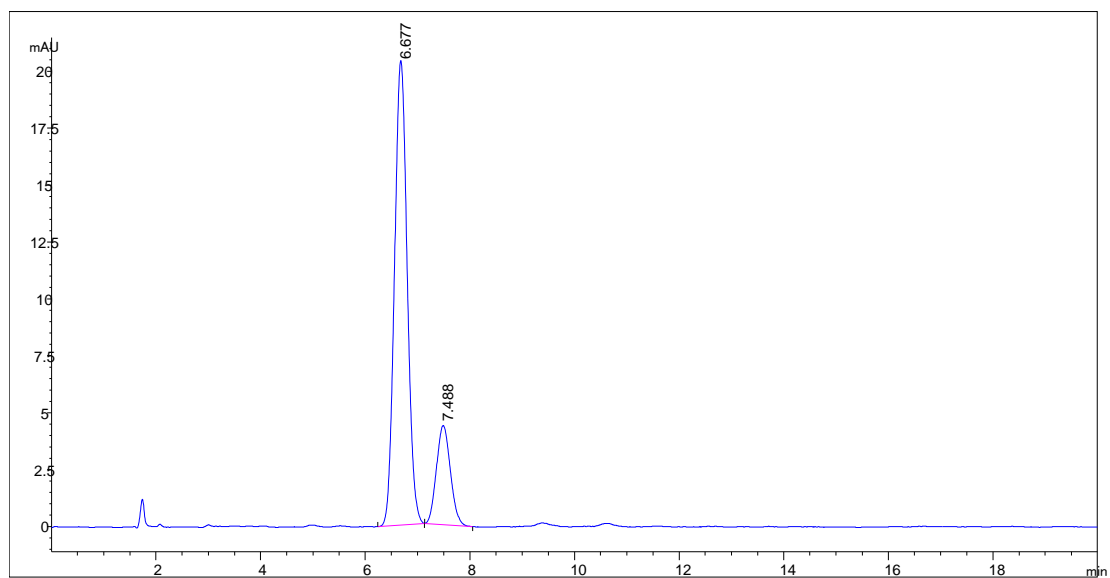

| # | Time (min) | Area (mAU*s) | Height(mAU) | Area % |
|---|------------|--------------|-------------|--------|
| 1 | 6.677      | 342.9        | 20.4        | 80.949 |
| 2 | 7.488      | 80.7         | 4.3         | 19.051 |

Fig.S 149 HPLC for pure enantioenriched compound **6k**



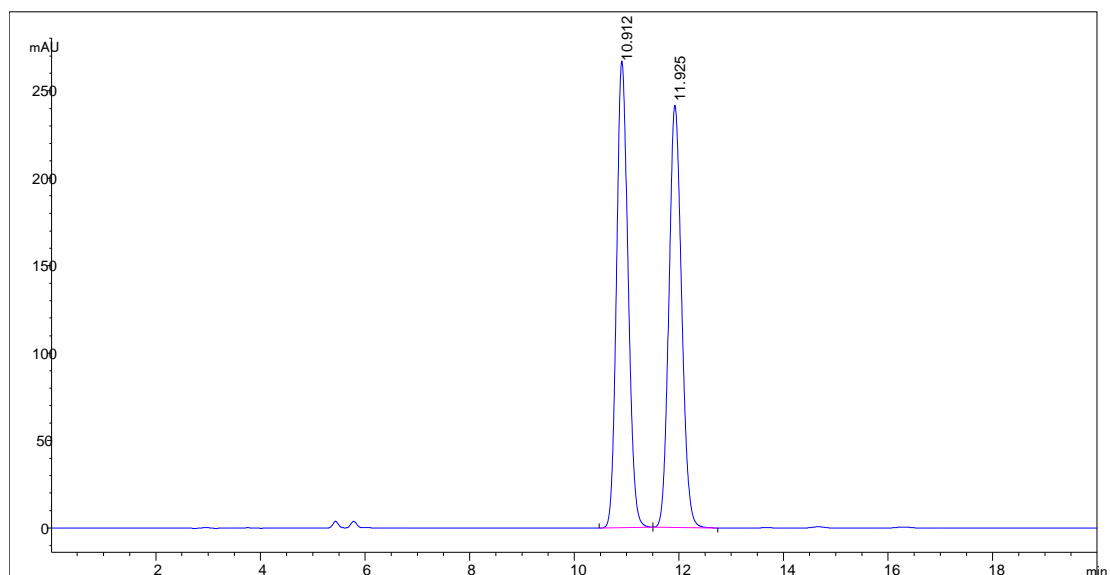

| # | Time (min) | Area (mAU*s) | Height(mAU) | Area % |
|---|------------|--------------|-------------|--------|
| 1 | 10.912     | 4087.5       | 266.9       | 50.002 |
| 2 | 11.925     | 4087.1       | 241.3       | 49.998 |

Fig.S 150 HPLC for racemic compound **6I**

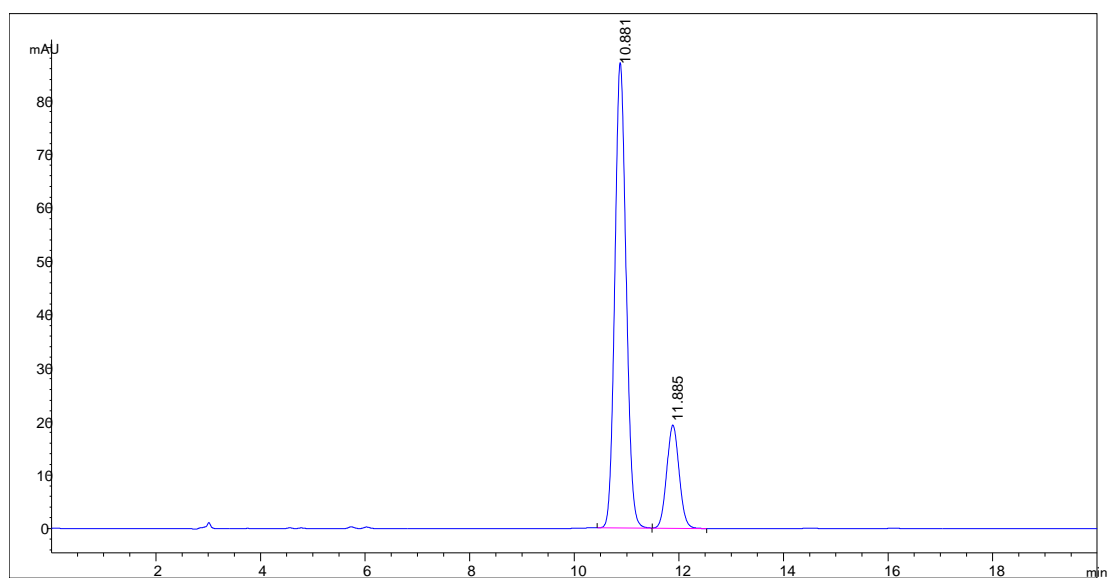

| # | Time (min) | Area (mAU*s) | Height(mAU) | Area % |
|---|------------|--------------|-------------|--------|
| 1 | 10.881     | 1310         | 87.1        | 80.456 |
| 2 | 11.885     | 318.2        | 19.3        | 19.544 |

Fig.S 151 HPLC for pure enantioenriched compound **6I**

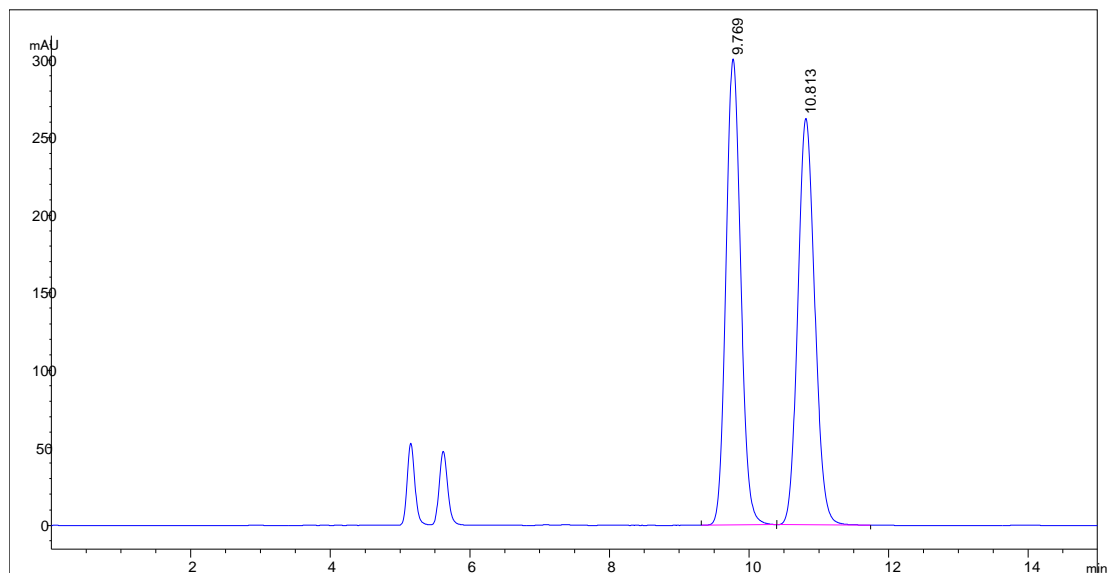

| # | Time (min) | Area (mAU*s) | Height(mAU) | Area % |
|---|------------|--------------|-------------|--------|
| 1 | 9.769      | 4410.6       | 300.7       | 50.026 |
| 2 | 10.813     | 4406         | 262         | 49.974 |

Fig.S 152 HPLC for racemic compound **6m**

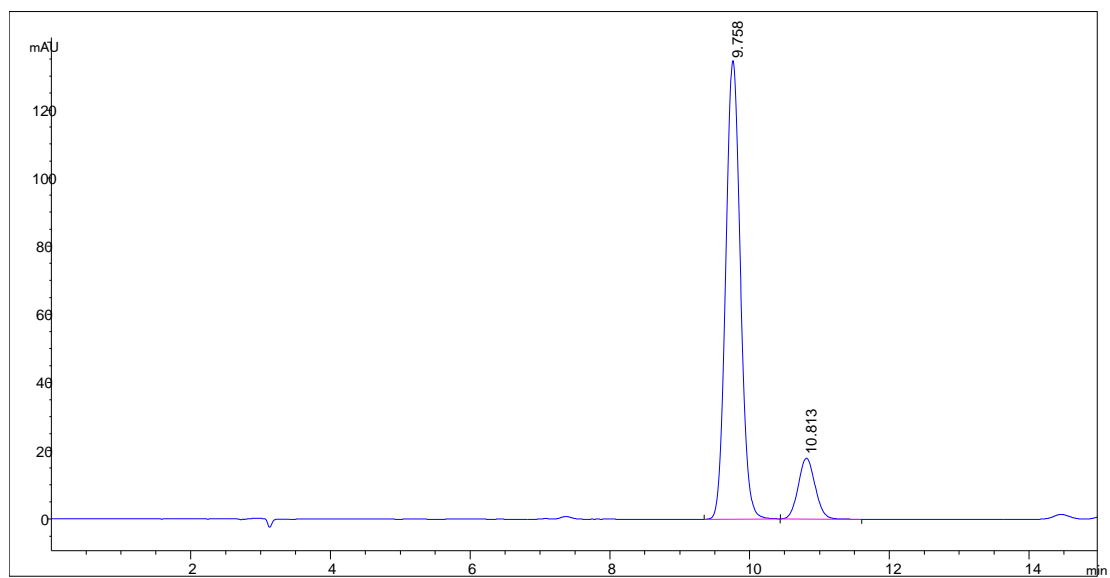

| # | Time (min) | Area (mAU*s) | Height(mAU) | Area % |
|---|------------|--------------|-------------|--------|
| 1 | 9.758      | 1957.8       | 134.5       | 86.798 |
| 2 | 10.813     | 297.8        | 17.9        | 13.202 |

Fig.S 153 HPLC for pure enantioenriched compound **6m**

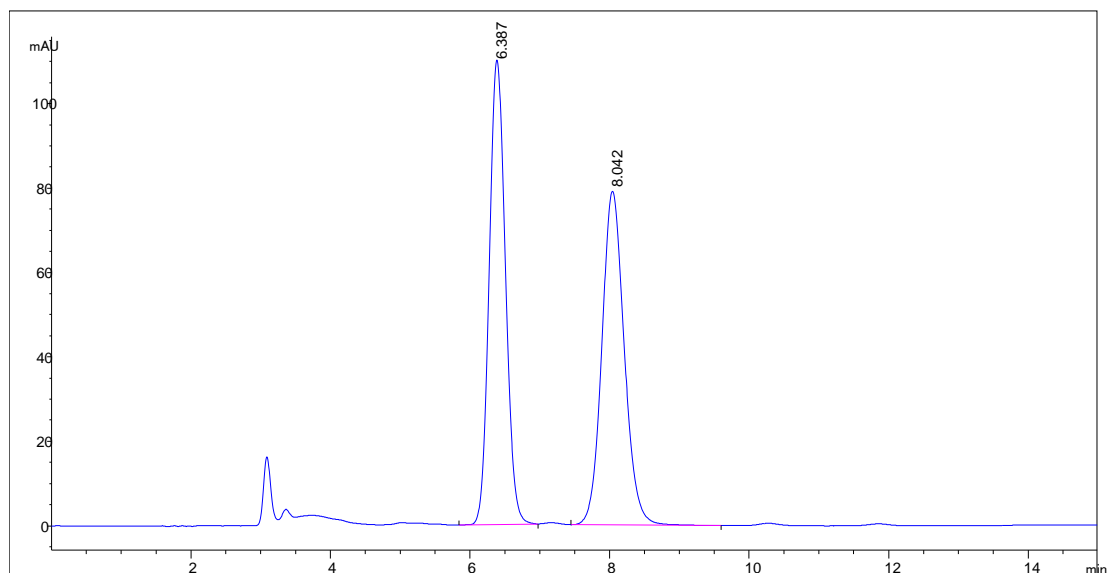

| # | Time (min) | Area (mAU*s) | Height(mAU) | Area % |
|---|------------|--------------|-------------|--------|
| 1 | 6.387      | 1771.5       | 110.1       | 50.157 |
| 2 | 8.042      | 1760.4       | 79.1        | 49.843 |

Fig.S 154 HPLC for racemic compound **6n**

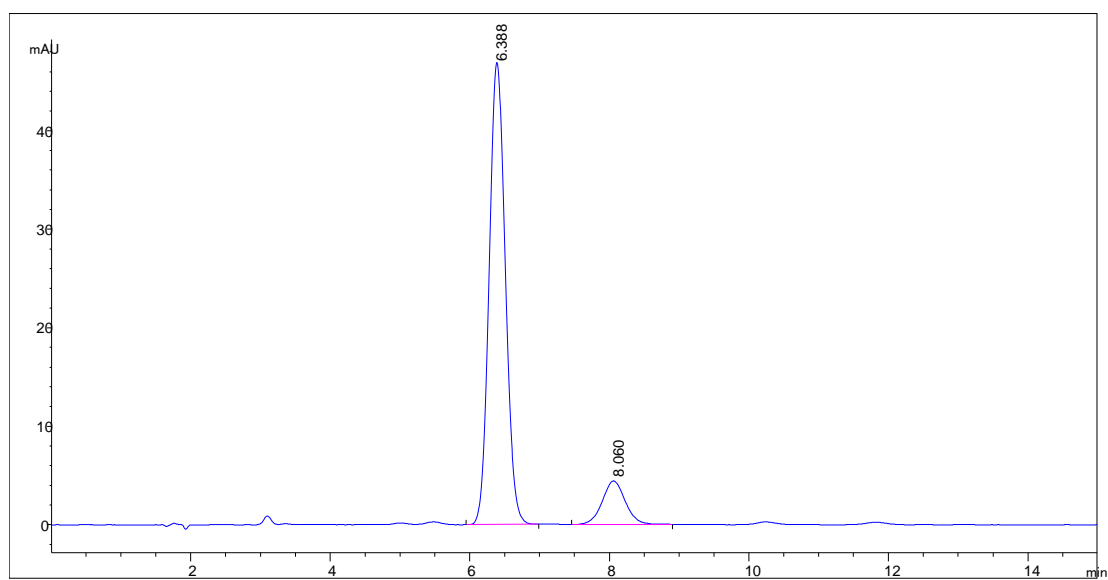

| # | Time (min) | Area (mAU*s) | Height(mAU) | Area % |
|---|------------|--------------|-------------|--------|
| 1 | 6.388      | 751.5        | 46.9        | 88.115 |
| 2 | 8.06       | 101.4        | 4.4         | 11.885 |

Fig.S 155 HPLC for pure enantioenriched compound **6n**

## 6. NMR spectrum and HPLC of diethyl (*S*)-(1,2,3,4-tetrahydroisoquinolin-1-yl) phosphonate **8**

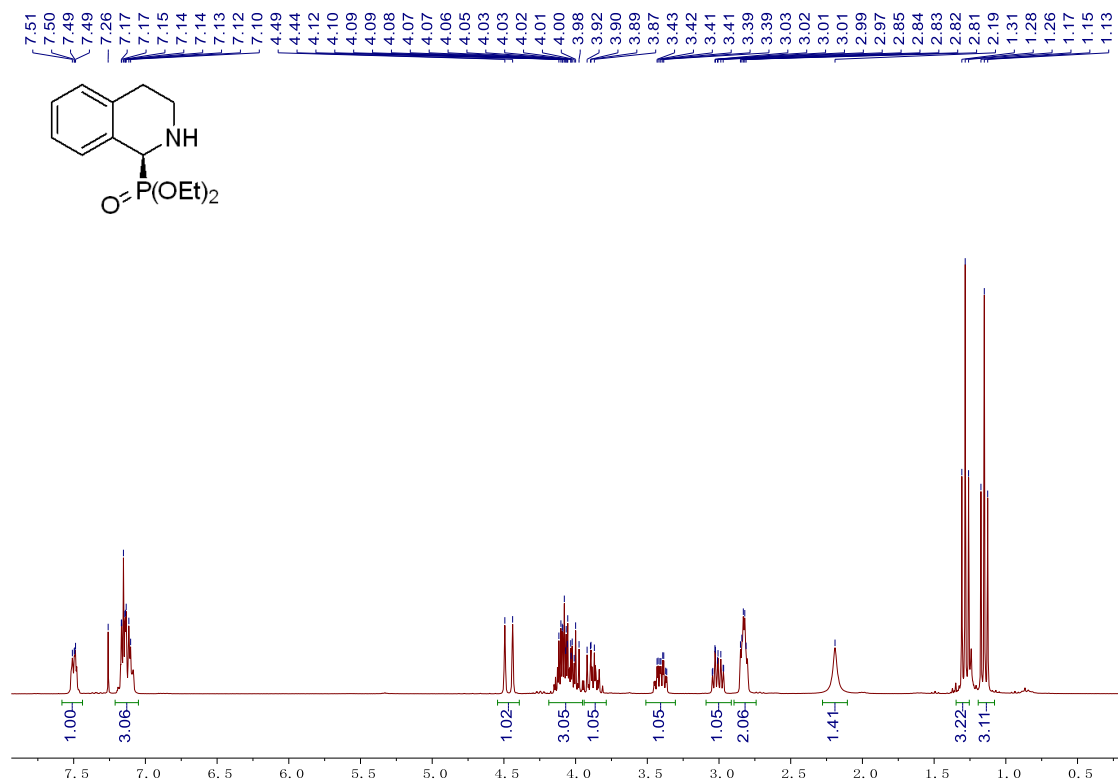

Fig.S 156 <sup>1</sup>H NMR of compound **8**

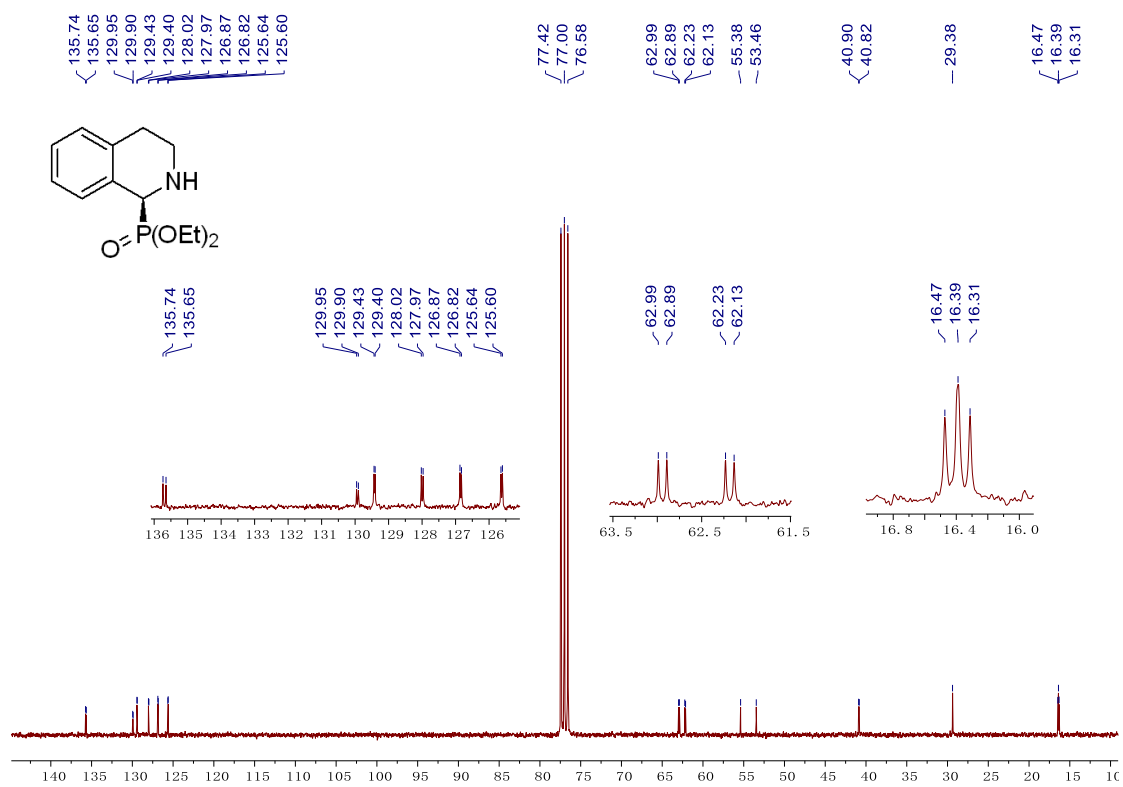

Fig.S 157 <sup>13</sup>C NMR of compound **8**

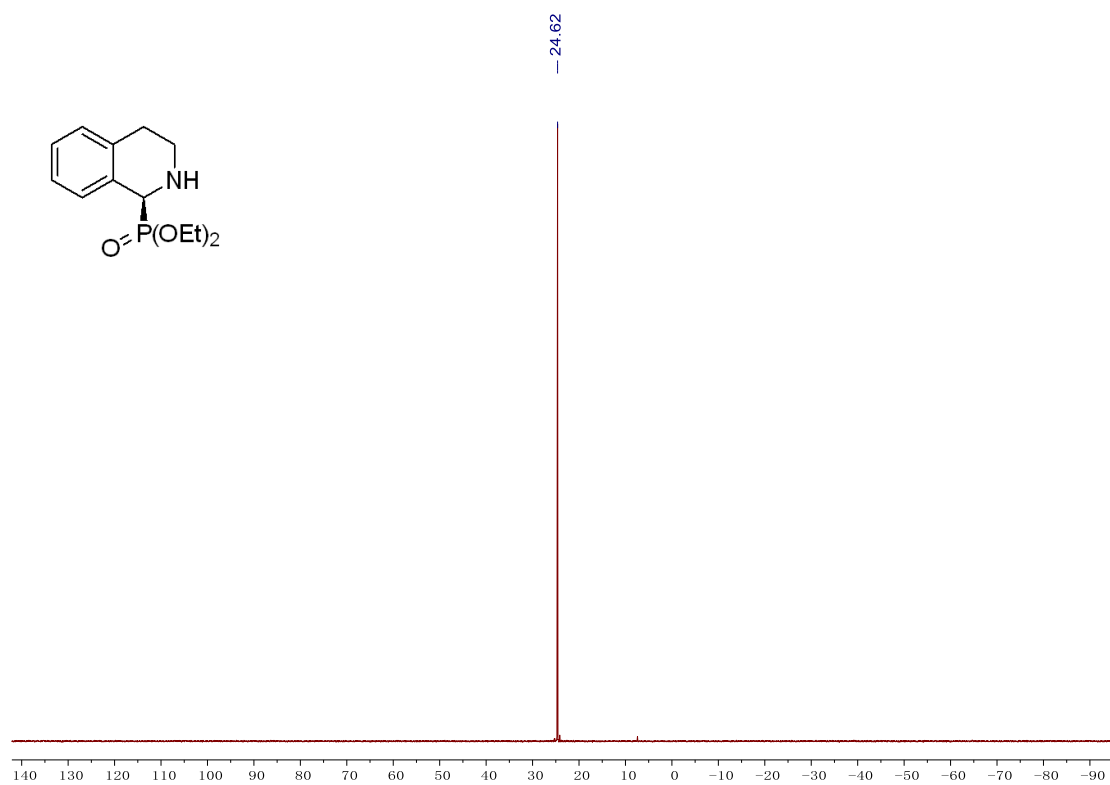

Fig.S 158  $^{31}\text{P}$  NMR of compound **8**

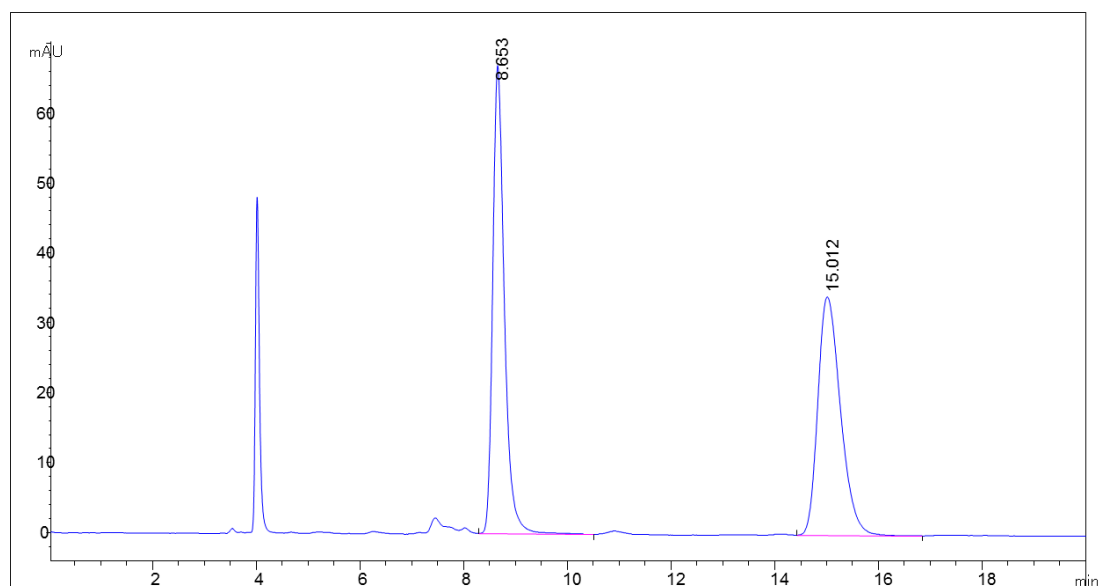

| # | Time (min) | Area (mAU*s) | Height(mAU) | Area % |
|---|------------|--------------|-------------|--------|
| 1 | 8.653      | 1448.5       | 67.1        | 50.303 |
| 2 | 15.012     | 1035.9       | 34          | 49.697 |

Fig.S 159 HPLC for racemic compound **8**

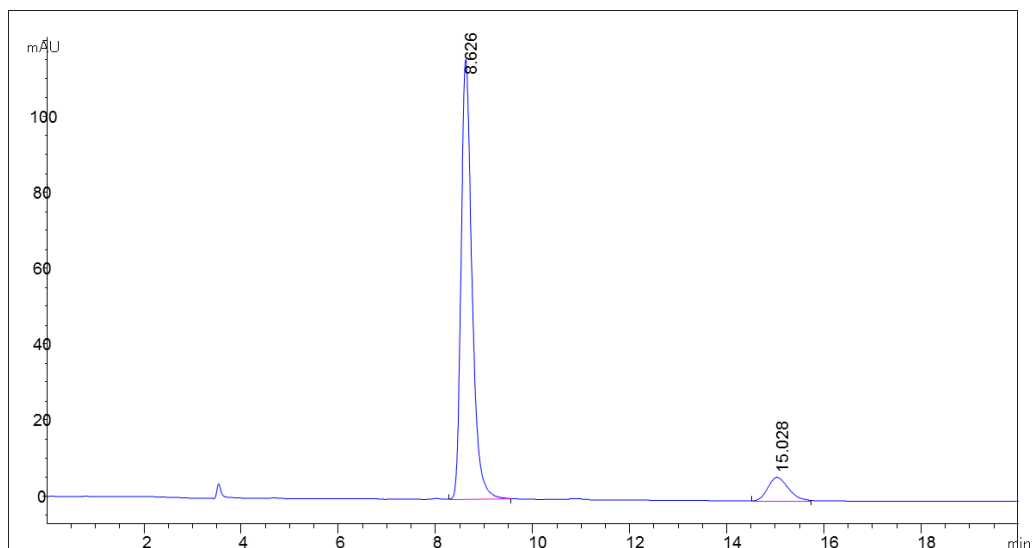

| # | Time (min) | Area (mAU*s) | Height(mAU) | Area % |
|---|------------|--------------|-------------|--------|
| 1 | 8.626      | 1798.1       | 116         | 90.48  |
| 2 | 15.028     | 189.2        | 6.3         | 9.52   |

Fig.S 160 HPLC for pure enantioenriched compound **8**

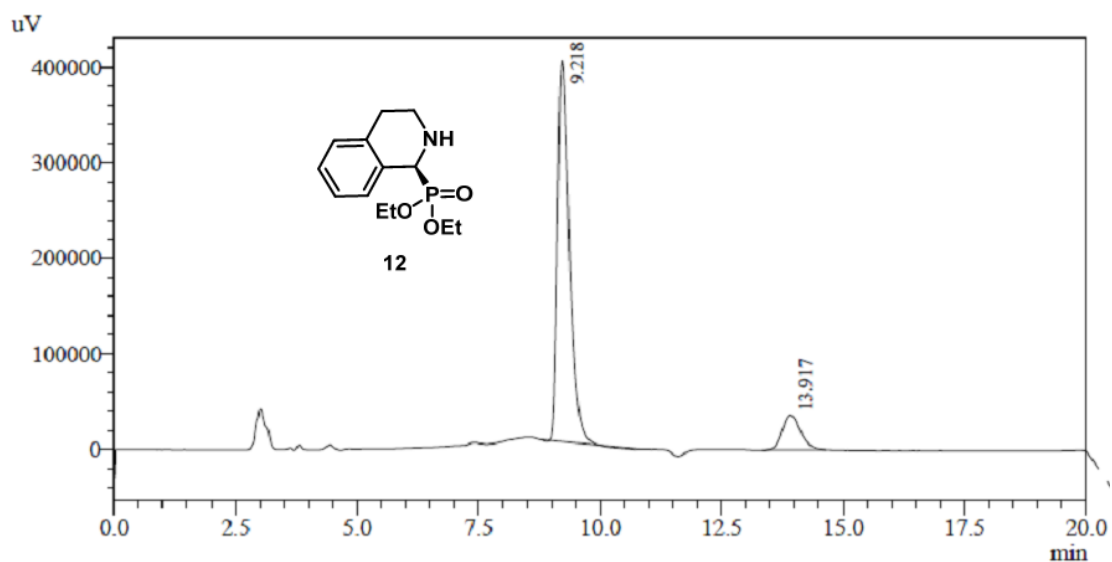

PeakTable

Detector A Ch1 210nm

| Peak# | Ret. Time | Area    | Area %  |
|-------|-----------|---------|---------|
| 1     | 9.218     | 6779973 | 87.473  |
| 2     | 13.917    | 970988  | 12.527  |
| Total |           | 7750961 | 100.000 |

Fig.S 161 HPLC for diethyl (*S*)-(1,2,3,4-tetrahydroisoquinolin-1-yl)phosphonate **8** (from *Chem. Sci.* 2016, 7, 6940-6945)

### 7. NMR spectrum of tert-butyl 1-(tert-butoxy)isoquinoline-2(1H)-carboxylate A.

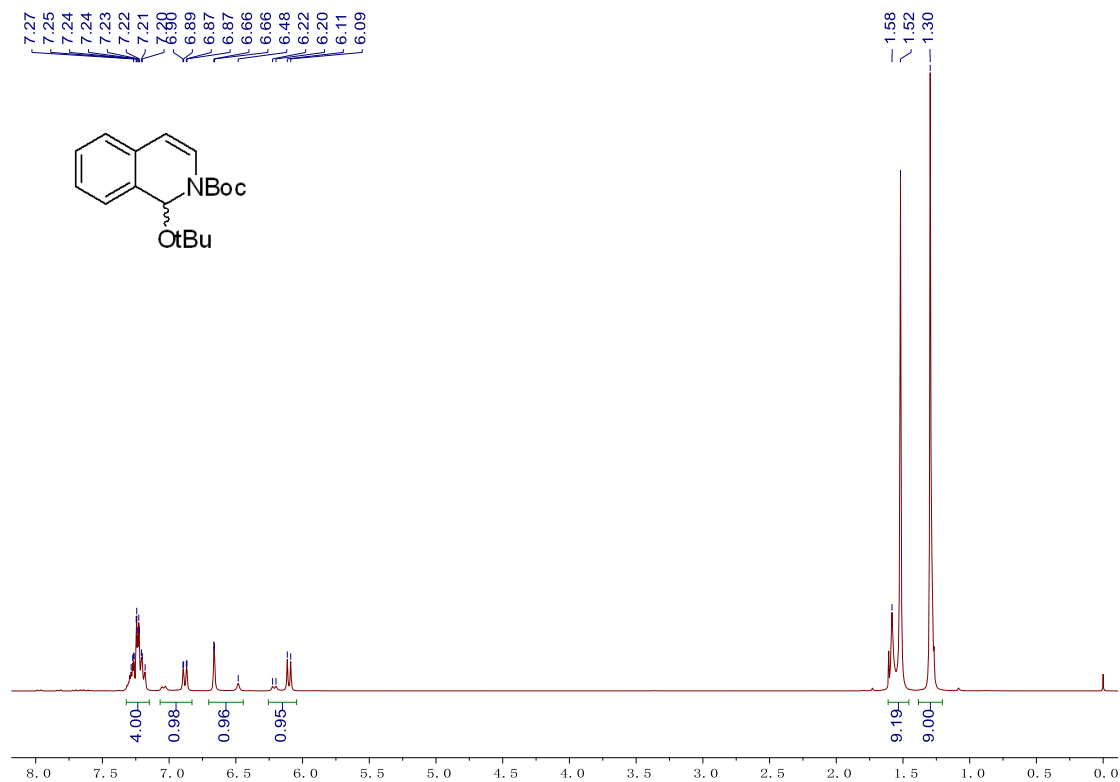

Fig.S 162 <sup>1</sup>H NMR of compound A

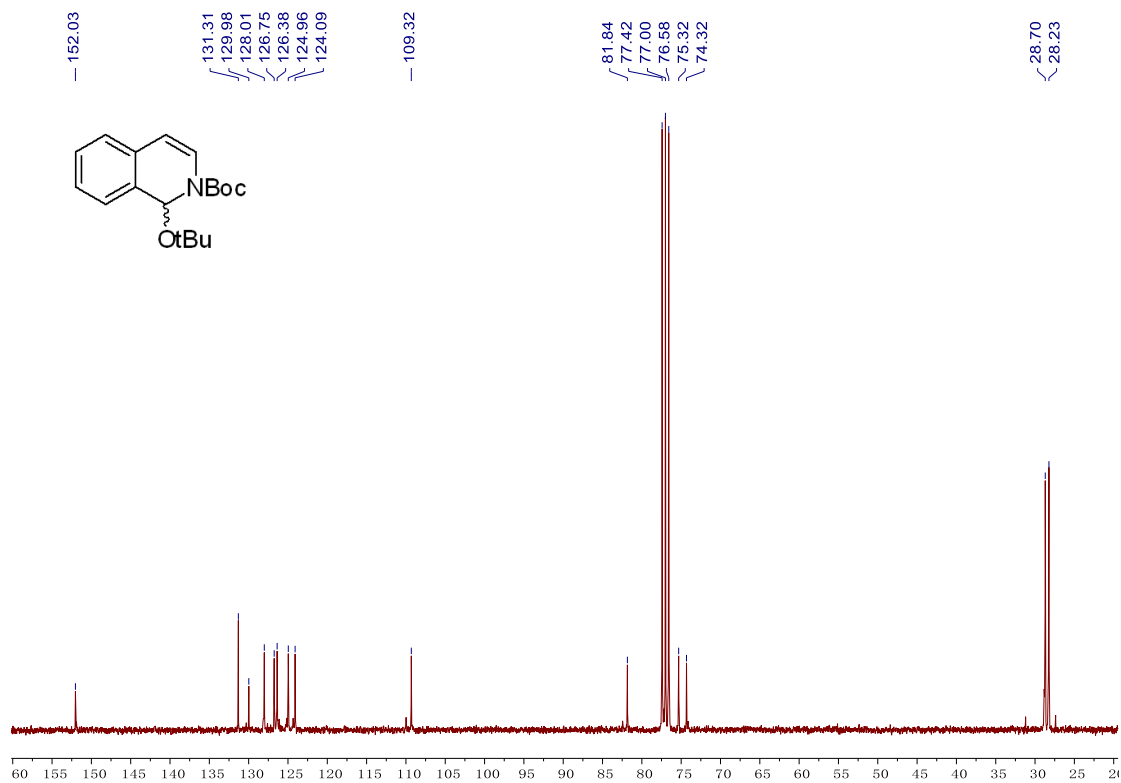

Fig.S 163 <sup>13</sup>C NMR of compound A
